# Supplementary material for: Changes in RNA Splicing in Developing Soybean (Glycine max) Embryos
Source: MDPI journal article supplement (doi:10.3390/biology2041311), 2013-11-21

**Figure S2.** Co-clustering analysis of 15368 transcripts displaying temporal differential expression during soybean embryo development. Co-clustering analysis was performed by using SplineCluster, as described in the Experimental Section, and resulted in 114 clusters.

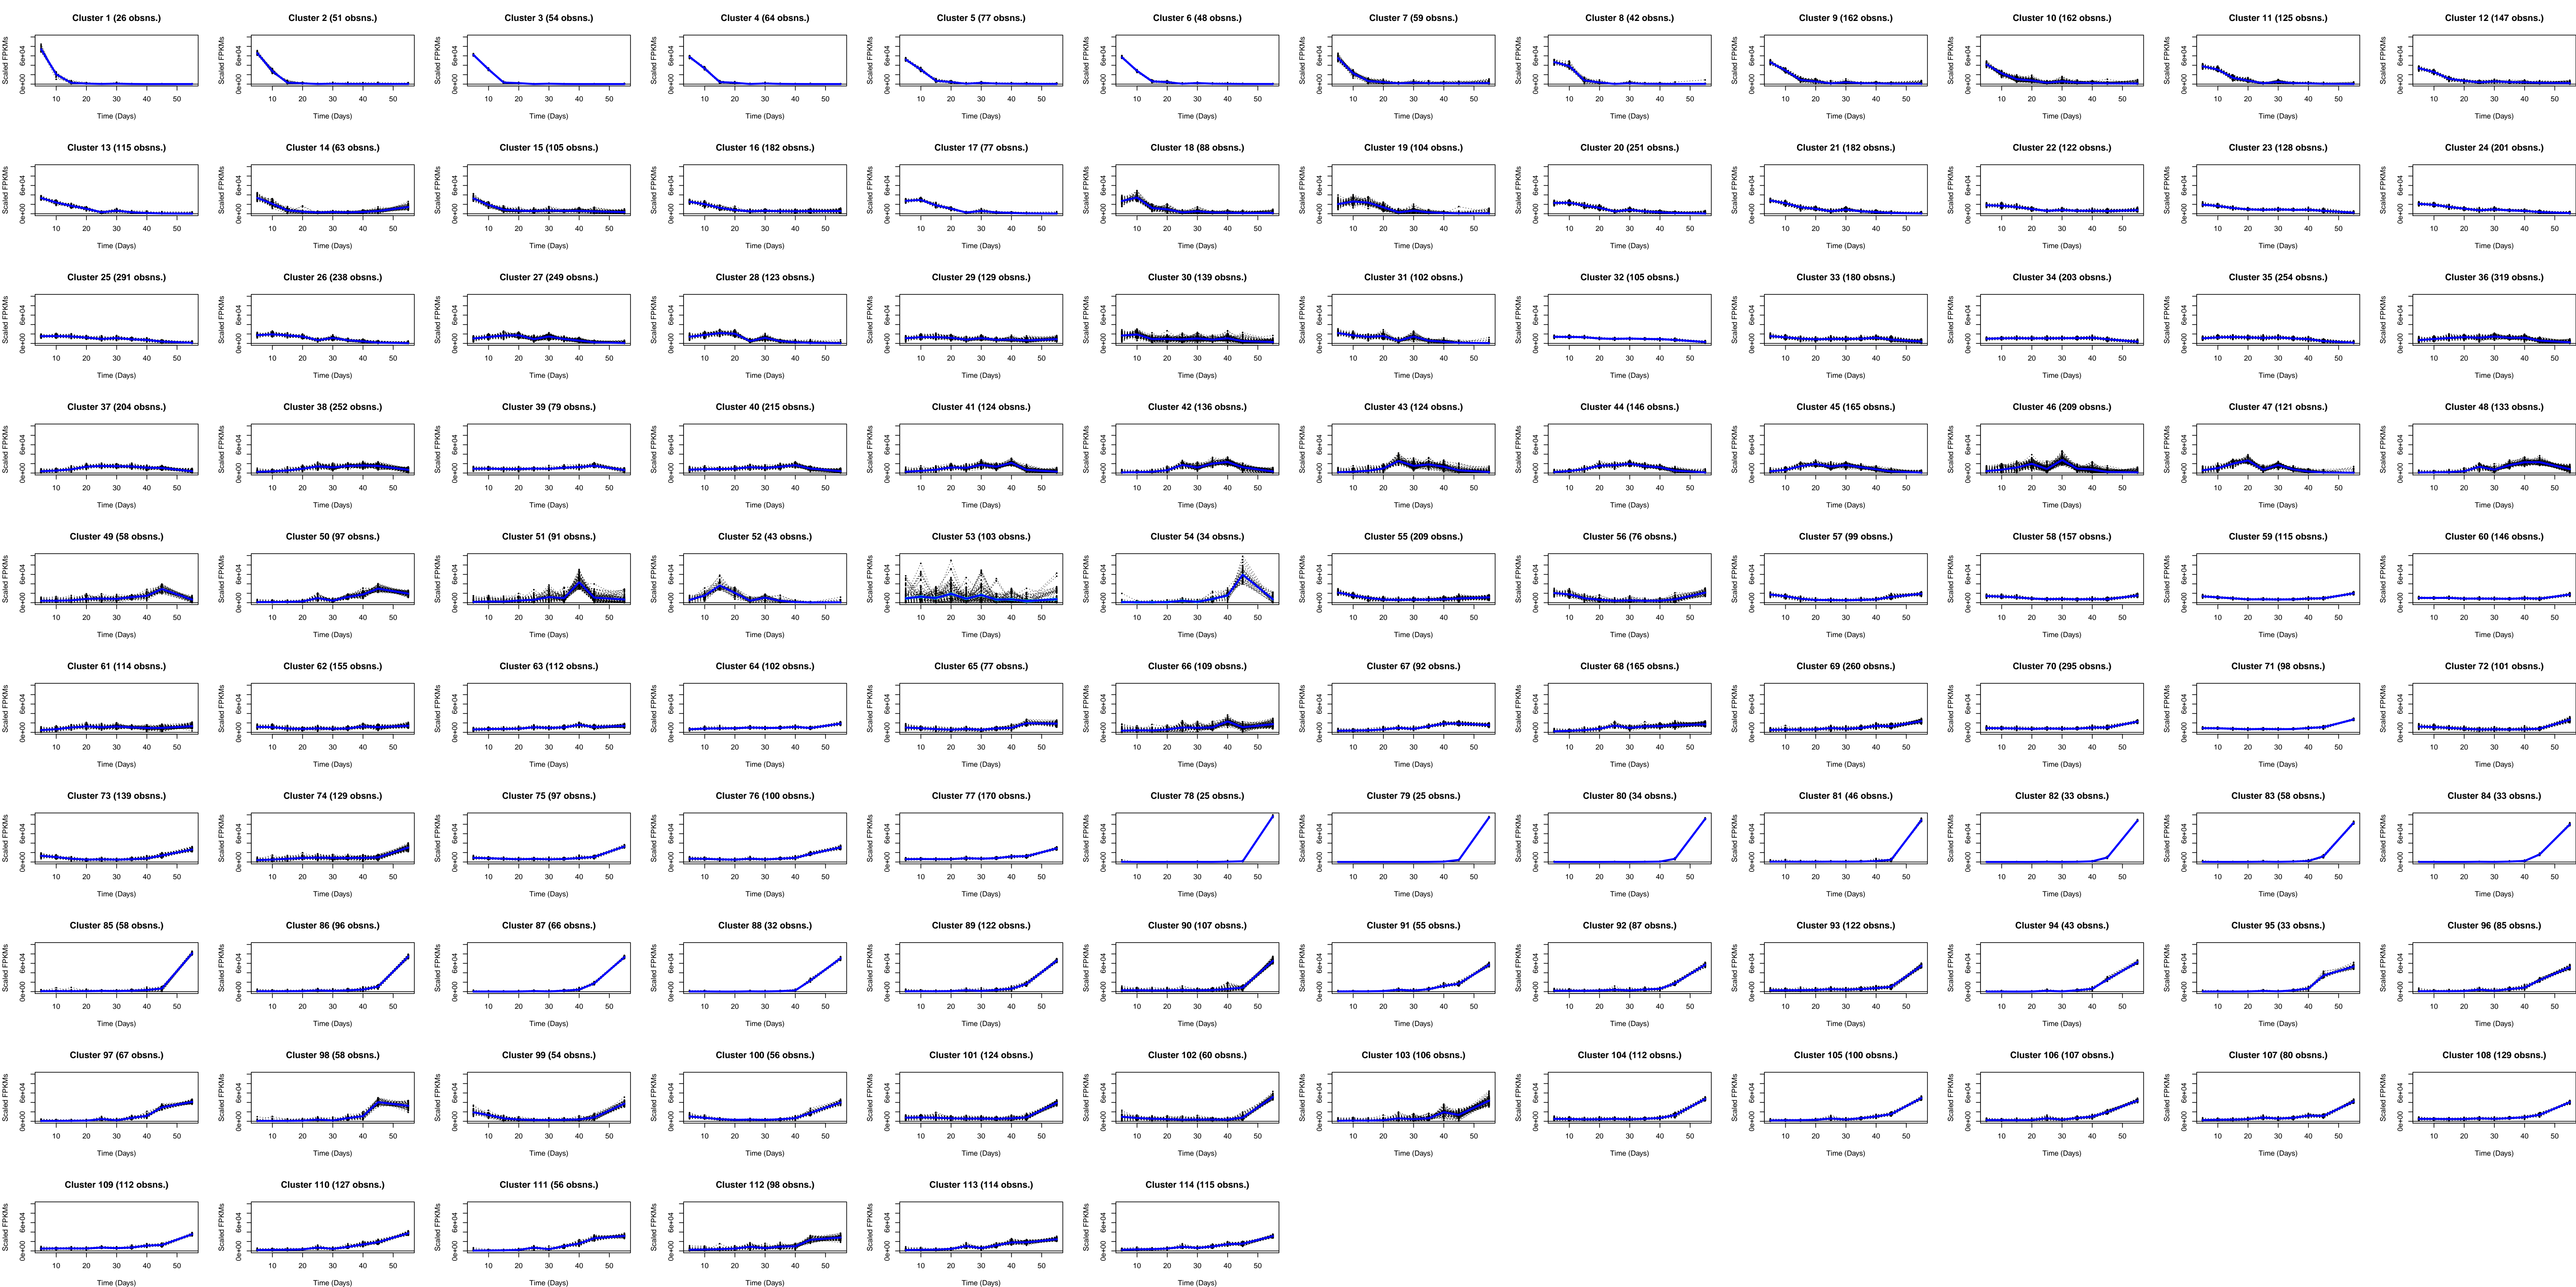

Supplement: s2 [file s2]
