# Supplementary material for: Changes in RNA Splicing in Developing Soybean (Glycine max) Embryos
Source: Biology (Basel). 2013 Nov 21;2(4):1311–37. doi: 10.3390/biology2041311 (PMC4009788; doi:10.3390/biology2041311)
Supplement: Supplementary File 5 — Supplementary Table S1 (XLSX, 11 KB) [file biology-02-01311-s005.xlsx]

## Sheet: Sheet1
Table S1. Genes and isoforms used for qPCR validation of RNA-seq-derived expression changes. Genes and isoforms are shown with the corresponding annotation, primer pairs used for qPCR, and time points of gene and isoform expression tested.
Gene/Isoform ID	Annotation	Forward_primer	Reverse_primer	Time points of interest
Glyma18g01330	glyceraldehyde-3P dehydrogenase C subunit	CGTTTGGTGGCCAGGGTTGC	GGGTCTTAGAGTCCTTCACCTTCACATCA	D25,D45,D55
Glyma06g23560	acyl-ACP thioesterase b	AATGCAACGGGAGAAACAAAAAACAGAAG	ACCATTATGAAGAATAATAACAACCCCCTACG	D35,D45,D55
Glyma08g24420	WRINKLED 1	TGCAAATGCAGCATACATTAAGATGATAAGT	GCCCGCAATAAATAAAAAAGGCAAAG	D15,D25,D45
Glyma07g05550	pyruvate dehydrogenase E1 alpha	CGTTTCTTCCGCCCCCTTCACTC	GCTGCAACAAAGAGCCAAAATCAATG	D15,D45
Glyma16g06850	glucose-6-phosphate dehydrogenase 6	TCCAAATTAGAGGGGCCTGAACAGAAAT	TAGTCATTGGTGTCATGTCAGCGCATAG	D25
Glyma10g06600	Phe ammonia-lyase 1	AACCCACTCTCTCTCCCTCTCCCC	CACAGAAGTTGGTGTTGGCAGCATTT	D15,D25,D35,D55
Glyma16g23750	DNAJ heat shock N-terminal domain-containing protein	TCCCTCCCTTCACCCTACTACCAAAG	GAGTAACAGTGGATGTAGGAAAAGGTGCTGT	D40,D45,D55
Glyma15g40440	protein kinase family protein	AACCATCTTTGTTTTGTTTCTTCACTTGTTTC	CGTGTCTCGCTGAAGAAGACGACTTAC	D40,D45,D55
Glyma16g33790	trypsin and protease inhibitor family protein	CAGGTTAACCATGAAGTTTATGTATCTTGC	GTAATCTACGCCAGCTCGAACTTTC	D55
Glyma07g06370	jasmonate resitant 1	GTTCTGCCTGACACAGTCCAAGC	TTAGCTCCAATATTATTGAAAGACTCCAG	D55
Glyma08g07460	oxidoreductase, 2OG-Fe(II) oxygenase family protein	GGTTGGTCACTATACCTTCTCTCTTCAG	TGATTCAGTTAGTGCTTTCACGCT	D25,D35,D55
Glyma14g00360	synaptic vesicle protein EHS-1	GCTGGCAACCTGGTATCCAAGAA	GCTTCCACGTTCACAGCTTTCG	Not changing (control)
Glyma13g16500	nucleosome assembly protein 1	AGGAGGAAGATGAAGATGACGATGATGAC	CAACAACTACATAAATGACCTTCTGCATCTACTG	Not changing (control)
Glyma07g11810.1	Gln synthase	CCTTGGTGGGTTTCCTGGAC	CTACAATATCACGGCCATAGGC	D40,D45,D55
Glyma07g11810.N3		CTTTGACGTATATCCTTATTTTATAG	CCTCTGTAACATAAAAACATCTC	D45
Glyma09g41340.3	SnRK 3.8	GAAGGCATACCTTCAACACCACCAC	GGCTTCAGGTCTGAGATCATTG	D35,D45,D55
Glyma09g41340.N4		GTTTCATTAGACCCGAAC	TTGCAAATTTCACCAATTTGGGTG	D55
Glyma05g34450.1	HSF-type DNA binding; heat shock TF	GAAACTTGAGAAATTGTTGT	CTTCATTACCTAGATAGTAG	D25
Glyma05g34450.N3		GGCTTCTGCAATAATAATATGC	CGTATGTTAGTGCACTAGTGC	D55
Glyma09g04000.2	ATP-citrate lyase	CAACTGATGGTGTTTCCCTGCCGCA	GTTGGTAAGGTAAGATCTATTC	D55
Glyma09g04000.3		CAGAATAGATCTTACCAACCCGA	GAAGCTAACTACCACCCTCCAC	D55
