# Supplementary material for: Changes in RNA Splicing in Developing Soybean (Glycine max) Embryos
Source: Biology (Basel). 2013 Nov 21;2(4):1311–37. doi: 10.3390/biology2041311 (PMC4009788; doi:10.3390/biology2041311)
Supplement: Supplementary File 6 — Supplementary Table S2 (XLSX, 11523 KB) [file biology-02-01311-s006.xlsx]

## Sheet: all 54K expressed isoforms
Table S2. Differential expression (DE) of isoforms – searchable tables. Table 1. 54k expressed isoforms shown here are encoded by the genes that had: (i) just one isoform changed significantly, while the other isoform(s) were expressed in a stable manner or (ii) at least two isoforms showing differential expression. The corresponding Cuffcompare class code, PAC_id, TSS_ID, information whether the…
Isoform_ID	Transcript_Class	PAC_ID	TSS_ID	Is differentially expressed?	Cluster_Number	Arabidopsis_Homologue	BINCODE	BIN_Name	Description	Type
Glyma11g15870.N2	j	PAC:26297257	TSS40957	No	NO Cluster	AT2G28490	'33.1'	'development.storage proteins'	'moderately similar to ( 425)AT2G28490| Symbols: | cupin family protein | chr2:12185889-12188060 REVERSEvery weakly similar to (94.4)VCLC_PEA no original description'
Glyma11g15870.1	=	PAC:26297257	TSS40957	Yes	68	AT2G28490	'33.1'	'development.storage proteins'	'moderately similar to ( 425)AT2G28490| Symbols: | cupin family protein | chr2:12185889-12188060 REVERSEvery weakly similar to (94.4)VCLC_PEA no original description'
Glyma17g05280.N2	j	PAC:26313588	TSS62303	No	NO Cluster	AT2G27810	'34.99'	'transport.misc'	'highly similar to ( 880)AT2G27810| Symbols: | xanthine/uracil permease family protein | chr2:11859415-11862488 FORWARD no original description'
Glyma17g05280.N3	j	PAC:26313588	TSS62303	No	NO Cluster	AT2G27810	'34.99'	'transport.misc'	'highly similar to ( 880)AT2G27810| Symbols: | xanthine/uracil permease family protein | chr2:11859415-11862488 FORWARD no original description'
Glyma17g05280.N4	j	PAC:26313588	TSS62303	No	NO Cluster	AT2G27810	'34.99'	'transport.misc'	'highly similar to ( 880)AT2G27810| Symbols: | xanthine/uracil permease family protein | chr2:11859415-11862488 FORWARD no original description'
Glyma17g05280.N5	j	PAC:26313588	TSS62303	No	NO Cluster	AT2G27810	'34.99'	'transport.misc'	'highly similar to ( 880)AT2G27810| Symbols: | xanthine/uracil permease family protein | chr2:11859415-11862488 FORWARD no original description'
Glyma17g05280.N6	j	PAC:26313588	TSS62303	Yes	24	AT2G27810	'34.99'	'transport.misc'	'highly similar to ( 880)AT2G27810| Symbols: | xanthine/uracil permease family protein | chr2:11859415-11862488 FORWARD no original description'
Glyma17g05280.1	=	PAC:26313588	TSS62303	No	NO Cluster	AT2G27810	'34.99'	'transport.misc'	'highly similar to ( 880)AT2G27810| Symbols: | xanthine/uracil permease family protein | chr2:11859415-11862488 FORWARD no original description'
Glyma16g05670.N3	j	PAC:26351540	TSS59277	No	NO Cluster	AT3G26935	'27.3.99'	'RNA.regulation of transcription.unclassified'	'highly similar to ( 641)AT3G26935| Symbols: | zinc finger (DHHC type) family protein | chr3:9934238-9936455 REVERSE no original description'
Glyma16g05670.N2	j	PAC:26351540	TSS59276	No	NO Cluster	AT3G26935	'27.3.99'	'RNA.regulation of transcription.unclassified'	'highly similar to ( 641)AT3G26935| Symbols: | zinc finger (DHHC type) family protein | chr3:9934238-9936455 REVERSE no original description'
Glyma16g05670.1	=	PAC:26351540	TSS59276	Yes	29	AT3G26935	'27.3.99'	'RNA.regulation of transcription.unclassified'	'highly similar to ( 641)AT3G26935| Symbols: | zinc finger (DHHC type) family protein | chr3:9934238-9936455 REVERSE no original description'
Glyma17g29001.N14	j	PAC:26310970	TSS65149	No	NO Cluster	NO MapMan Annotation
Glyma17g29001.N15	j	PAC:26310970	TSS65149	No	NO Cluster	NO MapMan Annotation
Glyma17g29001.N16	j	PAC:26310970	TSS65149	No	NO Cluster	NO MapMan Annotation
Glyma17g29001.1	=	PAC:26310970	TSS65150	No	NO Cluster	NO MapMan Annotation
Glyma17g29001.N10	j	PAC:26310970	TSS65149	No	NO Cluster	NO MapMan Annotation
Glyma17g29001.N9	j	PAC:26310970	TSS65149	Yes	55	NO MapMan Annotation
Glyma17g29001.N8	j	PAC:26310970	TSS65149	No	NO Cluster	NO MapMan Annotation
Glyma17g29001.N7	j	PAC:26310970	TSS65149	No	NO Cluster	NO MapMan Annotation
Glyma17g29001.N5	j	PAC:26310970	TSS65149	No	NO Cluster	NO MapMan Annotation
Glyma17g29001.N13	j	PAC:26310970	TSS65149	No	NO Cluster	NO MapMan Annotation
Glyma17g29001.N12	j	PAC:26310970	TSS65149	No	NO Cluster	NO MapMan Annotation
Glyma17g29001.N3	j	PAC:26310970	TSS65149	No	NO Cluster	NO MapMan Annotation
Glyma17g29001.N4	j	PAC:26310970	TSS65149	No	NO Cluster	NO MapMan Annotation
Glyma17g29001.N2	j	PAC:26310970	TSS65149	No	NO Cluster	NO MapMan Annotation
Glyma02g43100.1	=	PAC:26288019	TSS5062	Yes	39	AT5G05480	'35.2'	'not assigned.unknown'	'highly similar to ( 559)AT5G05480| Symbols: | similar to unknown protein [Arabidopsis thaliana] (TAIR:AT3G14920.1); similar to hypothetical protein [Vitis vinifera] (GB:CAN73340.1) | chr5:1622339-1624165 REVERSE no original description'
Glyma02g43100.N2	o	PAC:26288019	TSS5062	No	NO Cluster	AT5G05480	'35.2'	'not assigned.unknown'	'highly similar to ( 559)AT5G05480| Symbols: | similar to unknown protein [Arabidopsis thaliana] (TAIR:AT3G14920.1); similar to hypothetical protein [Vitis vinifera] (GB:CAN73340.1) | chr5:1622339-1624165 REVERSE no original description'
Glyma08g42720.N3	j	PAC:26306825	TSS28869	No	NO Cluster	AT1G11660	'20.2.1'	'stress.abiotic.heat'	'highly similar to ( 906)AT1G11660| Symbols: | heat shock protein, putative | chr1:3921056-3924347 FORWARDmoderately similar to ( 256)BIP_SPIOL no original description'
Glyma08g42720.N2	j	PAC:26306825	TSS28869	No	NO Cluster	AT1G11660	'20.2.1'	'stress.abiotic.heat'	'highly similar to ( 906)AT1G11660| Symbols: | heat shock protein, putative | chr1:3921056-3924347 FORWARDmoderately similar to ( 256)BIP_SPIOL no original description'
Glyma08g42720.N4	j	PAC:26306825	TSS28869	No	NO Cluster	AT1G11660	'20.2.1'	'stress.abiotic.heat'	'highly similar to ( 906)AT1G11660| Symbols: | heat shock protein, putative | chr1:3921056-3924347 FORWARDmoderately similar to ( 256)BIP_SPIOL no original description'
Glyma08g42720.1	=	PAC:26306825	TSS28869	Yes	60	AT1G11660	'20.2.1'	'stress.abiotic.heat'	'highly similar to ( 906)AT1G11660| Symbols: | heat shock protein, putative | chr1:3921056-3924347 FORWARDmoderately similar to ( 256)BIP_SPIOL no original description'
Glyma12g32040.N5	j	PAC:26292613	TSS46506	No	NO Cluster	AT1G05205	'35.2'	'not assigned.unknown'	'weakly similar to ( 102)AT1G05205| Symbols: | similar to hypothetical protein OsJ_021517 [Oryza sativa (japonica cultivar-group)] (GB:EAZ38034.1); similar to unknown protein [Oryza sativa (japonica cultivar-group)] (GB:BAD45491.1); similar to hypothetical protein OsI_023333 [Oryza sativa (indica cultivar-group)] (GB:EAZ02101.1) | chr1:1509351-1510248 REVERSE no original description'
Glyma12g32040.N6	j	PAC:26292613	TSS46506	No	NO Cluster	AT1G05205	'35.2'	'not assigned.unknown'	'weakly similar to ( 102)AT1G05205| Symbols: | similar to hypothetical protein OsJ_021517 [Oryza sativa (japonica cultivar-group)] (GB:EAZ38034.1); similar to unknown protein [Oryza sativa (japonica cultivar-group)] (GB:BAD45491.1); similar to hypothetical protein OsI_023333 [Oryza sativa (indica cultivar-group)] (GB:EAZ02101.1) | chr1:1509351-1510248 REVERSE no original description'
Glyma12g32040.N4	j	PAC:26292613	TSS46506	No	NO Cluster	AT1G05205	'35.2'	'not assigned.unknown'	'weakly similar to ( 102)AT1G05205| Symbols: | similar to hypothetical protein OsJ_021517 [Oryza sativa (japonica cultivar-group)] (GB:EAZ38034.1); similar to unknown protein [Oryza sativa (japonica cultivar-group)] (GB:BAD45491.1); similar to hypothetical protein OsI_023333 [Oryza sativa (indica cultivar-group)] (GB:EAZ02101.1) | chr1:1509351-1510248 REVERSE no original description'
Glyma12g32040.1	=	PAC:26292613	TSS46506	Yes	40	AT1G05205	'35.2'	'not assigned.unknown'	'weakly similar to ( 102)AT1G05205| Symbols: | similar to hypothetical protein OsJ_021517 [Oryza sativa (japonica cultivar-group)] (GB:EAZ38034.1); similar to unknown protein [Oryza sativa (japonica cultivar-group)] (GB:BAD45491.1); similar to hypothetical protein OsI_023333 [Oryza sativa (indica cultivar-group)] (GB:EAZ02101.1) | chr1:1509351-1510248 REVERSE no original description'
Glyma12g32040.N2	j	PAC:26292613	TSS46505	No	NO Cluster	AT1G05205	'35.2'	'not assigned.unknown'	'weakly similar to ( 102)AT1G05205| Symbols: | similar to hypothetical protein OsJ_021517 [Oryza sativa (japonica cultivar-group)] (GB:EAZ38034.1); similar to unknown protein [Oryza sativa (japonica cultivar-group)] (GB:BAD45491.1); similar to hypothetical protein OsI_023333 [Oryza sativa (indica cultivar-group)] (GB:EAZ02101.1) | chr1:1509351-1510248 REVERSE no original description'
Glyma12g32040.N3	j	PAC:26292613	TSS46506	No	NO Cluster	AT1G05205	'35.2'	'not assigned.unknown'	'weakly similar to ( 102)AT1G05205| Symbols: | similar to hypothetical protein OsJ_021517 [Oryza sativa (japonica cultivar-group)] (GB:EAZ38034.1); similar to unknown protein [Oryza sativa (japonica cultivar-group)] (GB:BAD45491.1); similar to hypothetical protein OsI_023333 [Oryza sativa (indica cultivar-group)] (GB:EAZ02101.1) | chr1:1509351-1510248 REVERSE no original description'
Glyma12g32040.2	=	PAC:26292614	TSS46506	No	NO Cluster	AT1G05205	'35.2'	'not assigned.unknown'	'weakly similar to ( 102)AT1G05205| Symbols: | similar to hypothetical protein OsJ_021517 [Oryza sativa (japonica cultivar-group)] (GB:EAZ38034.1); similar to unknown protein [Oryza sativa (japonica cultivar-group)] (GB:BAD45491.1); similar to hypothetical protein OsI_023333 [Oryza sativa (indica cultivar-group)] (GB:EAZ02101.1) | chr1:1509351-1510248 REVERSE no original description'
Glyma08g04530.N8	j	PAC:26306778	TSS29516	No	NO Cluster	AT3G18440	'35.2'	'not assigned.unknown'	'moderately similar to ( 445)AT3G18440| Symbols: ATALMT9 | ATALMT9 (ALUMINUM-ACTIVATED MALATE TRANSPORTER 9); anion channel/ | chr3:6328187-6330658 FORWARD no original description'
Glyma08g04530.N7	j	PAC:26306778	TSS29516	No	NO Cluster	AT3G18440	'35.2'	'not assigned.unknown'	'moderately similar to ( 445)AT3G18440| Symbols: ATALMT9 | ATALMT9 (ALUMINUM-ACTIVATED MALATE TRANSPORTER 9); anion channel/ | chr3:6328187-6330658 FORWARD no original description'
Glyma08g04530.N5	j	PAC:26306778	TSS29516	No	NO Cluster	AT3G18440	'35.2'	'not assigned.unknown'	'moderately similar to ( 445)AT3G18440| Symbols: ATALMT9 | ATALMT9 (ALUMINUM-ACTIVATED MALATE TRANSPORTER 9); anion channel/ | chr3:6328187-6330658 FORWARD no original description'
Glyma08g04530.N6	j	PAC:26306778	TSS29516	No	NO Cluster	AT3G18440	'35.2'	'not assigned.unknown'	'moderately similar to ( 445)AT3G18440| Symbols: ATALMT9 | ATALMT9 (ALUMINUM-ACTIVATED MALATE TRANSPORTER 9); anion channel/ | chr3:6328187-6330658 FORWARD no original description'
Glyma08g04530.1	=	PAC:26306779	TSS29516	Yes	113	AT3G18440	'35.2'	'not assigned.unknown'	'moderately similar to ( 445)AT3G18440| Symbols: ATALMT9 | ATALMT9 (ALUMINUM-ACTIVATED MALATE TRANSPORTER 9); anion channel/ | chr3:6328187-6330658 FORWARD no original description'
Glyma08g04530.4	=	PAC:26306780	TSS29516	No	NO Cluster	AT3G18440	'35.2'	'not assigned.unknown'	'moderately similar to ( 445)AT3G18440| Symbols: ATALMT9 | ATALMT9 (ALUMINUM-ACTIVATED MALATE TRANSPORTER 9); anion channel/ | chr3:6328187-6330658 FORWARD no original description'
Glyma08g04530.3	=	PAC:26306778	TSS29516	No	NO Cluster	AT3G18440	'35.2'	'not assigned.unknown'	'moderately similar to ( 445)AT3G18440| Symbols: ATALMT9 | ATALMT9 (ALUMINUM-ACTIVATED MALATE TRANSPORTER 9); anion channel/ | chr3:6328187-6330658 FORWARD no original description'
Glyma08g04530.2	=	PAC:26306777	TSS29516	No	NO Cluster	AT3G18440	'35.2'	'not assigned.unknown'	'moderately similar to ( 445)AT3G18440| Symbols: ATALMT9 | ATALMT9 (ALUMINUM-ACTIVATED MALATE TRANSPORTER 9); anion channel/ | chr3:6328187-6330658 FORWARD no original description'
Glyma08g04530.N9	j	PAC:26306778	TSS29516	No	NO Cluster	AT3G18440	'35.2'	'not assigned.unknown'	'moderately similar to ( 445)AT3G18440| Symbols: ATALMT9 | ATALMT9 (ALUMINUM-ACTIVATED MALATE TRANSPORTER 9); anion channel/ | chr3:6328187-6330658 FORWARD no original description'
Glyma07g03980.N8	j	PAC:26347706	TSS23040	No	NO Cluster	AT1G67120	'35.2'	'not assigned.unknown'	'nearly identical (4095)AT1G67120| Symbols: | midasin-related | chr1:25073390-25099189 REVERSE no original description'
Glyma07g03980.N7	j	PAC:26347706	TSS23040	No	NO Cluster	AT1G67120	'35.2'	'not assigned.unknown'	'nearly identical (4095)AT1G67120| Symbols: | midasin-related | chr1:25073390-25099189 REVERSE no original description'
Glyma07g03980.N5	j	PAC:26347706	TSS23038	No	NO Cluster	AT1G67120	'35.2'	'not assigned.unknown'	'nearly identical (4095)AT1G67120| Symbols: | midasin-related | chr1:25073390-25099189 REVERSE no original description'
Glyma07g03980.N4	j	PAC:26347706	TSS23038	No	NO Cluster	AT1G67120	'35.2'	'not assigned.unknown'	'nearly identical (4095)AT1G67120| Symbols: | midasin-related | chr1:25073390-25099189 REVERSE no original description'
Glyma07g03980.N3	j	PAC:26347706	TSS23038	No	NO Cluster	AT1G67120	'35.2'	'not assigned.unknown'	'nearly identical (4095)AT1G67120| Symbols: | midasin-related | chr1:25073390-25099189 REVERSE no original description'
Glyma07g03980.N2	j	PAC:26347706	TSS23038	No	NO Cluster	AT1G67120	'35.2'	'not assigned.unknown'	'nearly identical (4095)AT1G67120| Symbols: | midasin-related | chr1:25073390-25099189 REVERSE no original description'
Glyma07g03980.N6	j	PAC:26347706	TSS23039	No	NO Cluster	AT1G67120	'35.2'	'not assigned.unknown'	'nearly identical (4095)AT1G67120| Symbols: | midasin-related | chr1:25073390-25099189 REVERSE no original description'
Glyma07g03980.1	=	PAC:26347706	TSS23038	Yes	29	AT1G67120	'35.2'	'not assigned.unknown'	'nearly identical (4095)AT1G67120| Symbols: | midasin-related | chr1:25073390-25099189 REVERSE no original description'
Glyma04g10940.2	=	PAC:26304024	TSS13683	No	NO Cluster	AT1G78230	'29.4'	'protein.postranslational modification'	'moderately similar to ( 455)AT1G78230| Symbols: | protein binding | chr1:29435119-29437409 FORWARD no original description'
Glyma04g10940.3	=	PAC:26304023	TSS13682	Yes	28	AT1G78230	'29.4'	'protein.postranslational modification'	'moderately similar to ( 455)AT1G78230| Symbols: | protein binding | chr1:29435119-29437409 FORWARD no original description'
Glyma04g10940.1	=	PAC:26304022	TSS13683	No	NO Cluster	AT1G78230	'29.4'	'protein.postranslational modification'	'moderately similar to ( 455)AT1G78230| Symbols: | protein binding | chr1:29435119-29437409 FORWARD no original description'
Glyma04g10940.N4	j	PAC:26304023	TSS13682	No	NO Cluster	AT1G78230	'29.4'	'protein.postranslational modification'	'moderately similar to ( 455)AT1G78230| Symbols: | protein binding | chr1:29435119-29437409 FORWARD no original description'
Glyma04g10940.N5	j	PAC:26304023	TSS13682	No	NO Cluster	AT1G78230	'29.4'	'protein.postranslational modification'	'moderately similar to ( 455)AT1G78230| Symbols: | protein binding | chr1:29435119-29437409 FORWARD no original description'
Glyma05g02540.2	=	PAC:26321193	TSS16653	No	NO Cluster	AT5G63110	'27.3.55'	'RNA.regulation of transcription.HDA'	'highly similar to ( 716)AT5G63110| Symbols: AXE1, ATHDA6, RTS1, RPD3B, SIL1, HDA6 | HDA6 (HISTONE DEACETYLASE 6); histone deacetylase | chr5:25333060-25335453 REVERSEhighly similar to ( 561)HDAC_MAIZE no original description'
Glyma05g02540.1	=	PAC:26321192	TSS16653	Yes	73	AT5G63110	'27.3.55'	'RNA.regulation of transcription.HDA'	'highly similar to ( 716)AT5G63110| Symbols: AXE1, ATHDA6, RTS1, RPD3B, SIL1, HDA6 | HDA6 (HISTONE DEACETYLASE 6); histone deacetylase | chr5:25333060-25335453 REVERSEhighly similar to ( 561)HDAC_MAIZE no original description'
Glyma05g02540.N4	j	PAC:26321192	TSS16653	No	NO Cluster	AT5G63110	'27.3.55'	'RNA.regulation of transcription.HDA'	'highly similar to ( 716)AT5G63110| Symbols: AXE1, ATHDA6, RTS1, RPD3B, SIL1, HDA6 | HDA6 (HISTONE DEACETYLASE 6); histone deacetylase | chr5:25333060-25335453 REVERSEhighly similar to ( 561)HDAC_MAIZE no original description'
Glyma05g02540.N3	j	PAC:26321192	TSS16653	No	NO Cluster	AT5G63110	'27.3.55'	'RNA.regulation of transcription.HDA'	'highly similar to ( 716)AT5G63110| Symbols: AXE1, ATHDA6, RTS1, RPD3B, SIL1, HDA6 | HDA6 (HISTONE DEACETYLASE 6); histone deacetylase | chr5:25333060-25335453 REVERSEhighly similar to ( 561)HDAC_MAIZE no original description'
Glyma05g36630.1	=	PAC:26321009	TSS16373	Yes	23	AT5G53480	'29.3.1'	'protein.targeting.nucleus'	'nearly identical (1436)AT5G53480| Symbols: | importin beta-2, putative | chr5:21731242-21733935 FORWARD no original description'
Glyma05g36630.N3	j	PAC:26321009	TSS16374	No	NO Cluster	AT5G53480	'29.3.1'	'protein.targeting.nucleus'	'nearly identical (1436)AT5G53480| Symbols: | importin beta-2, putative | chr5:21731242-21733935 FORWARD no original description'
Glyma05g36630.N4	j	PAC:26321009	TSS16374	No	NO Cluster	AT5G53480	'29.3.1'	'protein.targeting.nucleus'	'nearly identical (1436)AT5G53480| Symbols: | importin beta-2, putative | chr5:21731242-21733935 FORWARD no original description'
Glyma05g36630.N2	j	PAC:26321009	TSS16372	No	NO Cluster	AT5G53480	'29.3.1'	'protein.targeting.nucleus'	'nearly identical (1436)AT5G53480| Symbols: | importin beta-2, putative | chr5:21731242-21733935 FORWARD no original description'
Glyma02g16611.N4	j	PAC:26289854	TSS4308	No	NO Cluster	NO MapMan Annotation
Glyma02g16611.N3	j	PAC:26289854	TSS4306	No	NO Cluster	NO MapMan Annotation
Glyma02g16611.N2	j	PAC:26289854	TSS4306	No	NO Cluster	NO MapMan Annotation
Glyma02g16611.1	=	PAC:26289854	TSS4307	Yes	9	NO MapMan Annotation
Glyma09g01110.N3	j	PAC:26341903	TSS31767	No	NO Cluster	AT1G05010	'17.5.1'	'hormone metabolism.ethylene.synthesis-degradation'	'moderately similar to ( 448)AT1G05010| Symbols: ACO4, EAT1, EFE | EFE (ETHYLENE FORMING ENZYME) | chr1:1431418-1432694 REVERSEhighly similar to ( 516)ACCO_PEA no original description'
Glyma09g01110.1	=	PAC:26341903	TSS31767	Yes	27	AT1G05010	'17.5.1'	'hormone metabolism.ethylene.synthesis-degradation'	'moderately similar to ( 448)AT1G05010| Symbols: ACO4, EAT1, EFE | EFE (ETHYLENE FORMING ENZYME) | chr1:1431418-1432694 REVERSEhighly similar to ( 516)ACCO_PEA no original description'
Glyma09g01110.N2	j	PAC:26341903	TSS31767	No	NO Cluster	AT1G05010	'17.5.1'	'hormone metabolism.ethylene.synthesis-degradation'	'moderately similar to ( 448)AT1G05010| Symbols: ACO4, EAT1, EFE | EFE (ETHYLENE FORMING ENZYME) | chr1:1431418-1432694 REVERSEhighly similar to ( 516)ACCO_PEA no original description'
Glyma16g32370.N5	j	PAC:26351075	TSS61726	No	NO Cluster	AT4G25440	'35.2'	'not assigned.unknown'	'highly similar to ( 573)AT4G25440| Symbols: ZFWD1 | ZFWD1 (zinc finger WD40 repeat protein 1); nucleic acid binding / zinc ion binding | chr4:13007117-13009391 REVERSE no original description'
Glyma16g32370.N4	j	PAC:26351075	TSS61726	No	NO Cluster	AT4G25440	'35.2'	'not assigned.unknown'	'highly similar to ( 573)AT4G25440| Symbols: ZFWD1 | ZFWD1 (zinc finger WD40 repeat protein 1); nucleic acid binding / zinc ion binding | chr4:13007117-13009391 REVERSE no original description'
Glyma16g32370.N6	j	PAC:26351075	TSS61726	No	NO Cluster	AT4G25440	'35.2'	'not assigned.unknown'	'highly similar to ( 573)AT4G25440| Symbols: ZFWD1 | ZFWD1 (zinc finger WD40 repeat protein 1); nucleic acid binding / zinc ion binding | chr4:13007117-13009391 REVERSE no original description'
Glyma16g32370.1	=	PAC:26351075	TSS61726	Yes	69	AT4G25440	'35.2'	'not assigned.unknown'	'highly similar to ( 573)AT4G25440| Symbols: ZFWD1 | ZFWD1 (zinc finger WD40 repeat protein 1); nucleic acid binding / zinc ion binding | chr4:13007117-13009391 REVERSE no original description'
Glyma16g32370.N3	j	PAC:26351075	TSS61726	No	NO Cluster	AT4G25440	'35.2'	'not assigned.unknown'	'highly similar to ( 573)AT4G25440| Symbols: ZFWD1 | ZFWD1 (zinc finger WD40 repeat protein 1); nucleic acid binding / zinc ion binding | chr4:13007117-13009391 REVERSE no original description'
Glyma16g32370.N2	j	PAC:26351075	TSS61726	No	NO Cluster	AT4G25440	'35.2'	'not assigned.unknown'	'highly similar to ( 573)AT4G25440| Symbols: ZFWD1 | ZFWD1 (zinc finger WD40 repeat protein 1); nucleic acid binding / zinc ion binding | chr4:13007117-13009391 REVERSE no original description'
Glyma16g32370.N8	j	PAC:26351075	TSS61726	No	NO Cluster	AT4G25440	'35.2'	'not assigned.unknown'	'highly similar to ( 573)AT4G25440| Symbols: ZFWD1 | ZFWD1 (zinc finger WD40 repeat protein 1); nucleic acid binding / zinc ion binding | chr4:13007117-13009391 REVERSE no original description'
Glyma16g32370.N7	j	PAC:26351075	TSS61726	No	NO Cluster	AT4G25440	'35.2'	'not assigned.unknown'	'highly similar to ( 573)AT4G25440| Symbols: ZFWD1 | ZFWD1 (zinc finger WD40 repeat protein 1); nucleic acid binding / zinc ion binding | chr4:13007117-13009391 REVERSE no original description'
Glyma16g32370.N9	j	PAC:26351075	TSS61726	No	NO Cluster	AT4G25440	'35.2'	'not assigned.unknown'	'highly similar to ( 573)AT4G25440| Symbols: ZFWD1 | ZFWD1 (zinc finger WD40 repeat protein 1); nucleic acid binding / zinc ion binding | chr4:13007117-13009391 REVERSE no original description'
Glyma19g02370.1	=	PAC:26326742	TSS69802	No	NO Cluster	AT1G69840	'35.2'	'not assigned.unknown'	'moderately similar to ( 446)AT1G69840| Symbols: | band 7 family protein | chr1:26297595-26298813 REVERSE no original description'
Glyma19g02370.4	=	PAC:26326740	TSS69801	Yes	63	AT1G69840	'35.2'	'not assigned.unknown'	'moderately similar to ( 446)AT1G69840| Symbols: | band 7 family protein | chr1:26297595-26298813 REVERSE no original description'
Glyma19g02370.5	=	PAC:26326741	TSS69801	No	NO Cluster	AT1G69840	'35.2'	'not assigned.unknown'	'moderately similar to ( 446)AT1G69840| Symbols: | band 7 family protein | chr1:26297595-26298813 REVERSE no original description'
Glyma12g30910.N3	j	PAC:26293855	TSS46426	No	NO Cluster	AT2G27600	'29.5.9'	'protein.degradation.AAA type'	'highly similar to ( 766)AT2G27600| Symbols: SKD1, VPS4 | SKD1/VPS4; ATP binding | chr2:11788303-11790807 FORWARDweakly similar to ( 176)CDC48_SOYBN no original description'	'29.5.11.20'	'protein.degradation.ubiquitin.proteasom'	'glyma12g30910'	'highly similar to ( 766)AT2G27600| Symbols: SKD1, VPS4 | SKD1/VPS4; ATP binding | chr2:11788303-11790807 FORWARDweakly similar to ( 176)CDC48_SOYBN no original description'
Glyma12g30910.N2	j	PAC:26293855	TSS46426	No	NO Cluster	AT2G27600	'29.5.9'	'protein.degradation.AAA type'	'highly similar to ( 766)AT2G27600| Symbols: SKD1, VPS4 | SKD1/VPS4; ATP binding | chr2:11788303-11790807 FORWARDweakly similar to ( 176)CDC48_SOYBN no original description'	'29.5.11.20'	'protein.degradation.ubiquitin.proteasom'	'glyma12g30910'	'highly similar to ( 766)AT2G27600| Symbols: SKD1, VPS4 | SKD1/VPS4; ATP binding | chr2:11788303-11790807 FORWARDweakly similar to ( 176)CDC48_SOYBN no original description'
Glyma12g30910.1	=	PAC:26293855	TSS46426	Yes	70	AT2G27600	'29.5.9'	'protein.degradation.AAA type'	'highly similar to ( 766)AT2G27600| Symbols: SKD1, VPS4 | SKD1/VPS4; ATP binding | chr2:11788303-11790807 FORWARDweakly similar to ( 176)CDC48_SOYBN no original description'	'29.5.11.20'	'protein.degradation.ubiquitin.proteasom'	'glyma12g30910'	'highly similar to ( 766)AT2G27600| Symbols: SKD1, VPS4 | SKD1/VPS4; ATP binding | chr2:11788303-11790807 FORWARDweakly similar to ( 176)CDC48_SOYBN no original description'
Glyma12g30910.N4	j	PAC:26293855	TSS46426	No	NO Cluster	AT2G27600	'29.5.9'	'protein.degradation.AAA type'	'highly similar to ( 766)AT2G27600| Symbols: SKD1, VPS4 | SKD1/VPS4; ATP binding | chr2:11788303-11790807 FORWARDweakly similar to ( 176)CDC48_SOYBN no original description'	'29.5.11.20'	'protein.degradation.ubiquitin.proteasom'	'glyma12g30910'	'highly similar to ( 766)AT2G27600| Symbols: SKD1, VPS4 | SKD1/VPS4; ATP binding | chr2:11788303-11790807 FORWARDweakly similar to ( 176)CDC48_SOYBN no original description'
Glyma12g30910.N5	j	PAC:26293855	TSS46426	No	NO Cluster	AT2G27600	'29.5.9'	'protein.degradation.AAA type'	'highly similar to ( 766)AT2G27600| Symbols: SKD1, VPS4 | SKD1/VPS4; ATP binding | chr2:11788303-11790807 FORWARDweakly similar to ( 176)CDC48_SOYBN no original description'	'29.5.11.20'	'protein.degradation.ubiquitin.proteasom'	'glyma12g30910'	'highly similar to ( 766)AT2G27600| Symbols: SKD1, VPS4 | SKD1/VPS4; ATP binding | chr2:11788303-11790807 FORWARDweakly similar to ( 176)CDC48_SOYBN no original description'
Glyma10g07710.1	=	PAC:26345944	TSS36152	No	NO Cluster	AT2G36460	'4.7'	'glycolysis.aldolase'	'highly similar to ( 612)AT2G36460| Symbols: | fructose-bisphosphate aldolase, putative | chr2:15304008-15304811 REVERSEhighly similar to ( 582)ALF_CICAR no original description'
Glyma10g07710.N3	j	PAC:26345944	TSS36153	Yes	86	AT2G36460	'4.7'	'glycolysis.aldolase'	'highly similar to ( 612)AT2G36460| Symbols: | fructose-bisphosphate aldolase, putative | chr2:15304008-15304811 REVERSEhighly similar to ( 582)ALF_CICAR no original description'
Glyma10g07710.N2	j	PAC:26345944	TSS36153	No	NO Cluster	AT2G36460	'4.7'	'glycolysis.aldolase'	'highly similar to ( 612)AT2G36460| Symbols: | fructose-bisphosphate aldolase, putative | chr2:15304008-15304811 REVERSEhighly similar to ( 582)ALF_CICAR no original description'
Glyma04g39700.2	=	PAC:26303475	TSS12762	No	NO Cluster	AT2G21940	'13.1.6.1.5'	'amino acid metabolism.synthesis.aromatic aa.chorismate.shikimate kinase'	'moderately similar to ( 280)AT2G21940| Symbols: | shikimate kinase, putative | chr2:9358186-9359961 FORWARD no original description'
Glyma04g39700.1	=	PAC:26303473	TSS12762	No	NO Cluster	AT2G21940	'13.1.6.1.5'	'amino acid metabolism.synthesis.aromatic aa.chorismate.shikimate kinase'	'moderately similar to ( 280)AT2G21940| Symbols: | shikimate kinase, putative | chr2:9358186-9359961 FORWARD no original description'
Glyma04g39700.4	=	PAC:26303476	TSS12762	No	NO Cluster	AT2G21940	'13.1.6.1.5'	'amino acid metabolism.synthesis.aromatic aa.chorismate.shikimate kinase'	'moderately similar to ( 280)AT2G21940| Symbols: | shikimate kinase, putative | chr2:9358186-9359961 FORWARD no original description'
Glyma04g39700.N12	j	PAC:26303473	TSS12762	No	NO Cluster	AT2G21940	'13.1.6.1.5'	'amino acid metabolism.synthesis.aromatic aa.chorismate.shikimate kinase'	'moderately similar to ( 280)AT2G21940| Symbols: | shikimate kinase, putative | chr2:9358186-9359961 FORWARD no original description'
Glyma04g39700.3	=	PAC:26303474	TSS12762	Yes	41	AT2G21940	'13.1.6.1.5'	'amino acid metabolism.synthesis.aromatic aa.chorismate.shikimate kinase'	'moderately similar to ( 280)AT2G21940| Symbols: | shikimate kinase, putative | chr2:9358186-9359961 FORWARD no original description'
Glyma04g39700.N11	j	PAC:26303473	TSS12762	No	NO Cluster	AT2G21940	'13.1.6.1.5'	'amino acid metabolism.synthesis.aromatic aa.chorismate.shikimate kinase'	'moderately similar to ( 280)AT2G21940| Symbols: | shikimate kinase, putative | chr2:9358186-9359961 FORWARD no original description'
Glyma04g39700.N9	j	PAC:26303473	TSS12762	No	NO Cluster	AT2G21940	'13.1.6.1.5'	'amino acid metabolism.synthesis.aromatic aa.chorismate.shikimate kinase'	'moderately similar to ( 280)AT2G21940| Symbols: | shikimate kinase, putative | chr2:9358186-9359961 FORWARD no original description'
Glyma04g39700.N10	j	PAC:26303473	TSS12762	No	NO Cluster	AT2G21940	'13.1.6.1.5'	'amino acid metabolism.synthesis.aromatic aa.chorismate.shikimate kinase'	'moderately similar to ( 280)AT2G21940| Symbols: | shikimate kinase, putative | chr2:9358186-9359961 FORWARD no original description'
Glyma04g39700.N7	j	PAC:26303473	TSS12762	No	NO Cluster	AT2G21940	'13.1.6.1.5'	'amino acid metabolism.synthesis.aromatic aa.chorismate.shikimate kinase'	'moderately similar to ( 280)AT2G21940| Symbols: | shikimate kinase, putative | chr2:9358186-9359961 FORWARD no original description'
Glyma04g39700.N8	j	PAC:26303473	TSS12762	No	NO Cluster	AT2G21940	'13.1.6.1.5'	'amino acid metabolism.synthesis.aromatic aa.chorismate.shikimate kinase'	'moderately similar to ( 280)AT2G21940| Symbols: | shikimate kinase, putative | chr2:9358186-9359961 FORWARD no original description'
Glyma04g39700.5	=	PAC:26303478	TSS12763	No	NO Cluster	AT2G21940	'13.1.6.1.5'	'amino acid metabolism.synthesis.aromatic aa.chorismate.shikimate kinase'	'moderately similar to ( 280)AT2G21940| Symbols: | shikimate kinase, putative | chr2:9358186-9359961 FORWARD no original description'
Glyma04g39700.6	=	PAC:26303477	TSS12764	No	NO Cluster	AT2G21940	'13.1.6.1.5'	'amino acid metabolism.synthesis.aromatic aa.chorismate.shikimate kinase'	'moderately similar to ( 280)AT2G21940| Symbols: | shikimate kinase, putative | chr2:9358186-9359961 FORWARD no original description'
Glyma11g05610.N5	j	PAC:26295398	TSS42164	No	NO Cluster	AT3G19420	'29.4'	'protein.postranslational modification'	'highly similar to ( 655)AT3G19420| Symbols: | phosphoric monoester hydrolase | chr3:6731830-6735360 FORWARD no original description'
Glyma11g05610.N6	j	PAC:26295398	TSS42164	No	NO Cluster	AT3G19420	'29.4'	'protein.postranslational modification'	'highly similar to ( 655)AT3G19420| Symbols: | phosphoric monoester hydrolase | chr3:6731830-6735360 FORWARD no original description'
Glyma11g05610.N2	j	PAC:26295398	TSS42164	No	NO Cluster	AT3G19420	'29.4'	'protein.postranslational modification'	'highly similar to ( 655)AT3G19420| Symbols: | phosphoric monoester hydrolase | chr3:6731830-6735360 FORWARD no original description'
Glyma11g05610.1	=	PAC:26295398	TSS42164	No	NO Cluster	AT3G19420	'29.4'	'protein.postranslational modification'	'highly similar to ( 655)AT3G19420| Symbols: | phosphoric monoester hydrolase | chr3:6731830-6735360 FORWARD no original description'
Glyma11g05610.N3	j	PAC:26295398	TSS42164	No	NO Cluster	AT3G19420	'29.4'	'protein.postranslational modification'	'highly similar to ( 655)AT3G19420| Symbols: | phosphoric monoester hydrolase | chr3:6731830-6735360 FORWARD no original description'
Glyma11g05610.N4	j	PAC:26295398	TSS42164	Yes	44	AT3G19420	'29.4'	'protein.postranslational modification'	'highly similar to ( 655)AT3G19420| Symbols: | phosphoric monoester hydrolase | chr3:6731830-6735360 FORWARD no original description'
Glyma11g05610.N7	j	PAC:26295398	TSS42164	No	NO Cluster	AT3G19420	'29.4'	'protein.postranslational modification'	'highly similar to ( 655)AT3G19420| Symbols: | phosphoric monoester hydrolase | chr3:6731830-6735360 FORWARD no original description'
Glyma19g36460.N11	j	PAC:26328715	TSS70935	No	NO Cluster	AT5G03160	'20.2.1'	'stress.abiotic.heat'	'highly similar to ( 506)AT5G03160| Symbols: | DNAJ heat shock N-terminal domain-containing protein | chr5:750285-752670 FORWARD no original description'
Glyma19g36460.N12	j	PAC:26328715	TSS70935	No	NO Cluster	AT5G03160	'20.2.1'	'stress.abiotic.heat'	'highly similar to ( 506)AT5G03160| Symbols: | DNAJ heat shock N-terminal domain-containing protein | chr5:750285-752670 FORWARD no original description'
Glyma19g36460.N9	j	PAC:26328715	TSS70935	No	NO Cluster	AT5G03160	'20.2.1'	'stress.abiotic.heat'	'highly similar to ( 506)AT5G03160| Symbols: | DNAJ heat shock N-terminal domain-containing protein | chr5:750285-752670 FORWARD no original description'
Glyma19g36460.N10	j	PAC:26328715	TSS70935	No	NO Cluster	AT5G03160	'20.2.1'	'stress.abiotic.heat'	'highly similar to ( 506)AT5G03160| Symbols: | DNAJ heat shock N-terminal domain-containing protein | chr5:750285-752670 FORWARD no original description'
Glyma19g36460.1	=	PAC:26328715	TSS70935	Yes	24	AT5G03160	'20.2.1'	'stress.abiotic.heat'	'highly similar to ( 506)AT5G03160| Symbols: | DNAJ heat shock N-terminal domain-containing protein | chr5:750285-752670 FORWARD no original description'
Glyma19g36460.N2	j	PAC:26328715	TSS70935	No	NO Cluster	AT5G03160	'20.2.1'	'stress.abiotic.heat'	'highly similar to ( 506)AT5G03160| Symbols: | DNAJ heat shock N-terminal domain-containing protein | chr5:750285-752670 FORWARD no original description'
Glyma19g36460.N6	j	PAC:26328715	TSS70935	No	NO Cluster	AT5G03160	'20.2.1'	'stress.abiotic.heat'	'highly similar to ( 506)AT5G03160| Symbols: | DNAJ heat shock N-terminal domain-containing protein | chr5:750285-752670 FORWARD no original description'
Glyma19g36460.N5	j	PAC:26328715	TSS70935	No	NO Cluster	AT5G03160	'20.2.1'	'stress.abiotic.heat'	'highly similar to ( 506)AT5G03160| Symbols: | DNAJ heat shock N-terminal domain-containing protein | chr5:750285-752670 FORWARD no original description'
Glyma19g36460.N8	j	PAC:26328715	TSS70935	No	NO Cluster	AT5G03160	'20.2.1'	'stress.abiotic.heat'	'highly similar to ( 506)AT5G03160| Symbols: | DNAJ heat shock N-terminal domain-containing protein | chr5:750285-752670 FORWARD no original description'
Glyma19g36460.N7	j	PAC:26328715	TSS70935	No	NO Cluster	AT5G03160	'20.2.1'	'stress.abiotic.heat'	'highly similar to ( 506)AT5G03160| Symbols: | DNAJ heat shock N-terminal domain-containing protein | chr5:750285-752670 FORWARD no original description'
Glyma19g36460.N4	j	PAC:26328715	TSS70935	No	NO Cluster	AT5G03160	'20.2.1'	'stress.abiotic.heat'	'highly similar to ( 506)AT5G03160| Symbols: | DNAJ heat shock N-terminal domain-containing protein | chr5:750285-752670 FORWARD no original description'
Glyma19g36460.N3	j	PAC:26328715	TSS70935	No	NO Cluster	AT5G03160	'20.2.1'	'stress.abiotic.heat'	'highly similar to ( 506)AT5G03160| Symbols: | DNAJ heat shock N-terminal domain-containing protein | chr5:750285-752670 FORWARD no original description'
Glyma15g00560.5	=	PAC:26330872	TSS55155	No	NO Cluster	AT1G16880	'13'	'amino acid metabolism'	'moderately similar to ( 355)AT1G16880| Symbols: | uridylyltransferase-related | chr1:5773789-5775265 FORWARD no original description'
Glyma15g00560.3	=	PAC:26330871	TSS55155	No	NO Cluster	AT1G16880	'13'	'amino acid metabolism'	'moderately similar to ( 355)AT1G16880| Symbols: | uridylyltransferase-related | chr1:5773789-5775265 FORWARD no original description'
Glyma15g00560.N8	s	PAC:26330870	TSS57036	No	NO Cluster	AT1G16880	'13'	'amino acid metabolism'	'moderately similar to ( 355)AT1G16880| Symbols: | uridylyltransferase-related | chr1:5773789-5775265 FORWARD no original description'
Glyma15g00560.1	=	PAC:26330870	TSS55154	No	NO Cluster	AT1G16880	'13'	'amino acid metabolism'	'moderately similar to ( 355)AT1G16880| Symbols: | uridylyltransferase-related | chr1:5773789-5775265 FORWARD no original description'
Glyma15g00560.N7	j	PAC:26330870	TSS55154	Yes	45	AT1G16880	'13'	'amino acid metabolism'	'moderately similar to ( 355)AT1G16880| Symbols: | uridylyltransferase-related | chr1:5773789-5775265 FORWARD no original description'
Glyma15g00560.7	=	PAC:26330874	TSS55156	No	NO Cluster	AT1G16880	'13'	'amino acid metabolism'	'moderately similar to ( 355)AT1G16880| Symbols: | uridylyltransferase-related | chr1:5773789-5775265 FORWARD no original description'
Glyma15g00560.6	=	PAC:26330873	TSS55155	No	NO Cluster	AT1G16880	'13'	'amino acid metabolism'	'moderately similar to ( 355)AT1G16880| Symbols: | uridylyltransferase-related | chr1:5773789-5775265 FORWARD no original description'
Glyma05g27550.N4	j	PAC:26321015	TSS15765	No	NO Cluster	AT1G30320	'27.3.99'	'RNA.regulation of transcription.unclassified'	'moderately similar to ( 352)AT1G30320| Symbols: | remorin family protein | chr1:10680330-10682834 FORWARD no original description'
Glyma05g27550.N2	j	PAC:26321015	TSS15764	No	NO Cluster	AT1G30320	'27.3.99'	'RNA.regulation of transcription.unclassified'	'moderately similar to ( 352)AT1G30320| Symbols: | remorin family protein | chr1:10680330-10682834 FORWARD no original description'
Glyma05g27550.1	=	PAC:26321015	TSS15764	Yes	32	AT1G30320	'27.3.99'	'RNA.regulation of transcription.unclassified'	'moderately similar to ( 352)AT1G30320| Symbols: | remorin family protein | chr1:10680330-10682834 FORWARD no original description'
Glyma05g27550.N3	j	PAC:26321015	TSS15765	No	NO Cluster	AT1G30320	'27.3.99'	'RNA.regulation of transcription.unclassified'	'moderately similar to ( 352)AT1G30320| Symbols: | remorin family protein | chr1:10680330-10682834 FORWARD no original description'
Glyma02g34870.N4	j	PAC:26289634	TSS6682	No	NO Cluster	AT2G35880	'35.2'	'not assigned.unknown'	'weakly similar to ( 108)AT2G35880| Symbols: | similar to unknown protein [Arabidopsis thaliana] (TAIR:AT4G32330.3); similar to unknown protein [Arabidopsis thaliana] (TAIR:AT4G32330.2); similar to unknown protein [Arabidopsis thaliana] (TAIR:AT4G32330.1); similar to Os06g0606800 [Oryza sativa (japonica cultivar-group)] (GB:NP_001058026.1); similar to unnamed protein product [Vitis vinifera] (GB:…
Glyma02g34870.2	=	PAC:26289635	TSS6682	No	NO Cluster	AT2G35880	'35.2'	'not assigned.unknown'	'weakly similar to ( 108)AT2G35880| Symbols: | similar to unknown protein [Arabidopsis thaliana] (TAIR:AT4G32330.3); similar to unknown protein [Arabidopsis thaliana] (TAIR:AT4G32330.2); similar to unknown protein [Arabidopsis thaliana] (TAIR:AT4G32330.1); similar to Os06g0606800 [Oryza sativa (japonica cultivar-group)] (GB:NP_001058026.1); similar to unnamed protein product [Vitis vinifera] (GB:…
Glyma02g34870.N3	j	PAC:26289634	TSS6682	No	NO Cluster	AT2G35880	'35.2'	'not assigned.unknown'	'weakly similar to ( 108)AT2G35880| Symbols: | similar to unknown protein [Arabidopsis thaliana] (TAIR:AT4G32330.3); similar to unknown protein [Arabidopsis thaliana] (TAIR:AT4G32330.2); similar to unknown protein [Arabidopsis thaliana] (TAIR:AT4G32330.1); similar to Os06g0606800 [Oryza sativa (japonica cultivar-group)] (GB:NP_001058026.1); similar to unnamed protein product [Vitis vinifera] (GB:…
Glyma02g34870.1	=	PAC:26289634	TSS6682	Yes	45	AT2G35880	'35.2'	'not assigned.unknown'	'weakly similar to ( 108)AT2G35880| Symbols: | similar to unknown protein [Arabidopsis thaliana] (TAIR:AT4G32330.3); similar to unknown protein [Arabidopsis thaliana] (TAIR:AT4G32330.2); similar to unknown protein [Arabidopsis thaliana] (TAIR:AT4G32330.1); similar to Os06g0606800 [Oryza sativa (japonica cultivar-group)] (GB:NP_001058026.1); similar to unnamed protein product [Vitis vinifera] (GB:…
Glyma07g03560.3	=	PAC:26350182	TSS23014	No	NO Cluster	AT1G80160	'24.2'	'Biodegradation of Xenobiotics.lactoylglutathione lyase'	'moderately similar to ( 268)AT1G80160| Symbols: | lactoylglutathione lyase family protein / glyoxalase I family protein | chr1:30156172-30156822 FORWARD no original description'
Glyma07g03560.2	=	PAC:26350183	TSS23013	No	NO Cluster	AT1G80160	'24.2'	'Biodegradation of Xenobiotics.lactoylglutathione lyase'	'moderately similar to ( 268)AT1G80160| Symbols: | lactoylglutathione lyase family protein / glyoxalase I family protein | chr1:30156172-30156822 FORWARD no original description'
Glyma07g03560.N6	j	PAC:26350181	TSS23013	No	NO Cluster	AT1G80160	'24.2'	'Biodegradation of Xenobiotics.lactoylglutathione lyase'	'moderately similar to ( 268)AT1G80160| Symbols: | lactoylglutathione lyase family protein / glyoxalase I family protein | chr1:30156172-30156822 FORWARD no original description'
Glyma07g03560.1	=	PAC:26350181	TSS23013	Yes	110	AT1G80160	'24.2'	'Biodegradation of Xenobiotics.lactoylglutathione lyase'	'moderately similar to ( 268)AT1G80160| Symbols: | lactoylglutathione lyase family protein / glyoxalase I family protein | chr1:30156172-30156822 FORWARD no original description'
Glyma07g03560.N4	j	PAC:26350181	TSS23013	No	NO Cluster	AT1G80160	'24.2'	'Biodegradation of Xenobiotics.lactoylglutathione lyase'	'moderately similar to ( 268)AT1G80160| Symbols: | lactoylglutathione lyase family protein / glyoxalase I family protein | chr1:30156172-30156822 FORWARD no original description'
Glyma07g03560.N5	j	PAC:26350181	TSS23013	No	NO Cluster	AT1G80160	'24.2'	'Biodegradation of Xenobiotics.lactoylglutathione lyase'	'moderately similar to ( 268)AT1G80160| Symbols: | lactoylglutathione lyase family protein / glyoxalase I family protein | chr1:30156172-30156822 FORWARD no original description'
Glyma05g27480.N3	j	PAC:26321484	TSS15760	Yes	70	AT1G17210	'35.2'	'not assigned.unknown'	'highly similar to ( 797)AT1G17210| Symbols: | zinc ion binding | chr1:5880495-5884650 REVERSE no original description'
Glyma05g27480.N5	j	PAC:26321484	TSS15760	No	NO Cluster	AT1G17210	'35.2'	'not assigned.unknown'	'highly similar to ( 797)AT1G17210| Symbols: | zinc ion binding | chr1:5880495-5884650 REVERSE no original description'
Glyma05g27480.N4	j	PAC:26321484	TSS15760	No	NO Cluster	AT1G17210	'35.2'	'not assigned.unknown'	'highly similar to ( 797)AT1G17210| Symbols: | zinc ion binding | chr1:5880495-5884650 REVERSE no original description'
Glyma05g27480.N7	j	PAC:26321484	TSS15760	No	NO Cluster	AT1G17210	'35.2'	'not assigned.unknown'	'highly similar to ( 797)AT1G17210| Symbols: | zinc ion binding | chr1:5880495-5884650 REVERSE no original description'
Glyma05g27480.N6	j	PAC:26321484	TSS15760	No	NO Cluster	AT1G17210	'35.2'	'not assigned.unknown'	'highly similar to ( 797)AT1G17210| Symbols: | zinc ion binding | chr1:5880495-5884650 REVERSE no original description'
Glyma05g27480.N10	j	PAC:26321484	TSS15760	No	NO Cluster	AT1G17210	'35.2'	'not assigned.unknown'	'highly similar to ( 797)AT1G17210| Symbols: | zinc ion binding | chr1:5880495-5884650 REVERSE no original description'
Glyma05g27480.N11	j	PAC:26321484	TSS15760	No	NO Cluster	AT1G17210	'35.2'	'not assigned.unknown'	'highly similar to ( 797)AT1G17210| Symbols: | zinc ion binding | chr1:5880495-5884650 REVERSE no original description'
Glyma05g27480.N8	j	PAC:26321484	TSS15760	No	NO Cluster	AT1G17210	'35.2'	'not assigned.unknown'	'highly similar to ( 797)AT1G17210| Symbols: | zinc ion binding | chr1:5880495-5884650 REVERSE no original description'
Glyma05g27480.N9	j	PAC:26321484	TSS15760	No	NO Cluster	AT1G17210	'35.2'	'not assigned.unknown'	'highly similar to ( 797)AT1G17210| Symbols: | zinc ion binding | chr1:5880495-5884650 REVERSE no original description'
Glyma05g27480.N14	j	PAC:26321484	TSS15760	No	NO Cluster	AT1G17210	'35.2'	'not assigned.unknown'	'highly similar to ( 797)AT1G17210| Symbols: | zinc ion binding | chr1:5880495-5884650 REVERSE no original description'
Glyma05g27480.1	=	PAC:26321483	TSS15760	No	NO Cluster	AT1G17210	'35.2'	'not assigned.unknown'	'highly similar to ( 797)AT1G17210| Symbols: | zinc ion binding | chr1:5880495-5884650 REVERSE no original description'
Glyma05g27480.N12	j	PAC:26321484	TSS15760	No	NO Cluster	AT1G17210	'35.2'	'not assigned.unknown'	'highly similar to ( 797)AT1G17210| Symbols: | zinc ion binding | chr1:5880495-5884650 REVERSE no original description'
Glyma05g27480.N13	j	PAC:26321484	TSS15760	No	NO Cluster	AT1G17210	'35.2'	'not assigned.unknown'	'highly similar to ( 797)AT1G17210| Symbols: | zinc ion binding | chr1:5880495-5884650 REVERSE no original description'
Glyma05g27480.2	=	PAC:26321484	TSS15761	No	NO Cluster	AT1G17210	'35.2'	'not assigned.unknown'	'highly similar to ( 797)AT1G17210| Symbols: | zinc ion binding | chr1:5880495-5884650 REVERSE no original description'
Glyma10g29580.N2	j	PAC:26343541	TSS38811	No	NO Cluster	AT5G27540	'30.5'	'signalling.G-proteins'	'highly similar to ( 895)AT5G27540| Symbols: EMB2473 | EMB2473 (EMBRYO DEFECTIVE 2473); GTP binding | chr5:9722819-9727115 FORWARD no original description'
Glyma10g29580.1	=	PAC:26343541	TSS38811	Yes	60	AT5G27540	'30.5'	'signalling.G-proteins'	'highly similar to ( 895)AT5G27540| Symbols: EMB2473 | EMB2473 (EMBRYO DEFECTIVE 2473); GTP binding | chr5:9722819-9727115 FORWARD no original description'
Glyma10g29580.N4	j	PAC:26343541	TSS38811	No	NO Cluster	AT5G27540	'30.5'	'signalling.G-proteins'	'highly similar to ( 895)AT5G27540| Symbols: EMB2473 | EMB2473 (EMBRYO DEFECTIVE 2473); GTP binding | chr5:9722819-9727115 FORWARD no original description'
Glyma10g29580.N3	j	PAC:26343541	TSS38811	No	NO Cluster	AT5G27540	'30.5'	'signalling.G-proteins'	'highly similar to ( 895)AT5G27540| Symbols: EMB2473 | EMB2473 (EMBRYO DEFECTIVE 2473); GTP binding | chr5:9722819-9727115 FORWARD no original description'
Glyma09g33920.N2	j	PAC:26340298	TSS33118	No	NO Cluster	AT1G32330	'27.3.23'	'RNA.regulation of transcription.HSF,Heat-shock transcription factor family'	'moderately similar to ( 329)AT1G32330| Symbols: HSFA1D, ATHSFA1D | ATHSFA1D (Arabidopsis thaliana heat shock transcription factor A1D); DNA binding / transcription factor | chr1:11657245-11660214 REVERSE no original description'
Glyma09g33920.N3	j	PAC:26340298	TSS33118	No	NO Cluster	AT1G32330	'27.3.23'	'RNA.regulation of transcription.HSF,Heat-shock transcription factor family'	'moderately similar to ( 329)AT1G32330| Symbols: HSFA1D, ATHSFA1D | ATHSFA1D (Arabidopsis thaliana heat shock transcription factor A1D); DNA binding / transcription factor | chr1:11657245-11660214 REVERSE no original description'
Glyma09g33920.N4	j	PAC:26340298	TSS33119	No	NO Cluster	AT1G32330	'27.3.23'	'RNA.regulation of transcription.HSF,Heat-shock transcription factor family'	'moderately similar to ( 329)AT1G32330| Symbols: HSFA1D, ATHSFA1D | ATHSFA1D (Arabidopsis thaliana heat shock transcription factor A1D); DNA binding / transcription factor | chr1:11657245-11660214 REVERSE no original description'
Glyma09g33920.1	=	PAC:26340298	TSS33119	Yes	71	AT1G32330	'27.3.23'	'RNA.regulation of transcription.HSF,Heat-shock transcription factor family'	'moderately similar to ( 329)AT1G32330| Symbols: HSFA1D, ATHSFA1D | ATHSFA1D (Arabidopsis thaliana heat shock transcription factor A1D); DNA binding / transcription factor | chr1:11657245-11660214 REVERSE no original description'
Glyma11g02960.N2	j	PAC:26297731	TSS41982	No	NO Cluster	AT1G62990	'27.3.22'	'RNA.regulation of transcription.HB,Homeobox transcription factor family'	'moderately similar to ( 439)AT1G62990| Symbols: IXR11, KNAT7 | KNAT7 (Knotted-like Arabidopsis thaliana); DNA binding / transcription factor | chr1:23341133-23344013 FORWARDmoderately similar to ( 430)HD1_BRANA no original description'
Glyma11g02960.1	=	PAC:26297731	TSS41983	Yes	69	AT1G62990	'27.3.22'	'RNA.regulation of transcription.HB,Homeobox transcription factor family'	'moderately similar to ( 439)AT1G62990| Symbols: IXR11, KNAT7 | KNAT7 (Knotted-like Arabidopsis thaliana); DNA binding / transcription factor | chr1:23341133-23344013 FORWARDmoderately similar to ( 430)HD1_BRANA no original description'
Glyma13g35653.1	=	PAC:26317049	TSS48763	No	NO Cluster	NO MapMan Annotation
Glyma13g35653.N2	j	PAC:26317049	TSS48763	Yes	86	NO MapMan Annotation
Glyma04g33320.2	=	PAC:26304772	TSS12368	Yes	103	AT1G08570	'21.1'	'redox.thioredoxin'	'moderately similar to ( 240)AT1G08570| Symbols: | thioredoxin family protein | chr1:2713607-2714315 FORWARD no original description'
Glyma04g33320.N4	j	PAC:26304772	TSS12368	No	NO Cluster	AT1G08570	'21.1'	'redox.thioredoxin'	'moderately similar to ( 240)AT1G08570| Symbols: | thioredoxin family protein | chr1:2713607-2714315 FORWARD no original description'
Glyma04g33320.N3	j	PAC:26304772	TSS12368	No	NO Cluster	AT1G08570	'21.1'	'redox.thioredoxin'	'moderately similar to ( 240)AT1G08570| Symbols: | thioredoxin family protein | chr1:2713607-2714315 FORWARD no original description'
Glyma14g33670.1	=	PAC:26287292	TSS53188	Yes	58	AT1G36990	'35.2'	'not assigned.unknown'	'moderately similar to ( 268)AT1G36990| Symbols: | similar to unknown protein [Arabidopsis thaliana] (TAIR:AT4G08510.1); similar to unnamed protein product [Vitis vinifera] (GB:CAO61797.1) | chr1:14030035-14032152 REVERSE no original description'
Glyma14g33670.N5	j	PAC:26287292	TSS53188	No	NO Cluster	AT1G36990	'35.2'	'not assigned.unknown'	'moderately similar to ( 268)AT1G36990| Symbols: | similar to unknown protein [Arabidopsis thaliana] (TAIR:AT4G08510.1); similar to unnamed protein product [Vitis vinifera] (GB:CAO61797.1) | chr1:14030035-14032152 REVERSE no original description'
Glyma14g33670.N3	j	PAC:26287292	TSS53188	No	NO Cluster	AT1G36990	'35.2'	'not assigned.unknown'	'moderately similar to ( 268)AT1G36990| Symbols: | similar to unknown protein [Arabidopsis thaliana] (TAIR:AT4G08510.1); similar to unnamed protein product [Vitis vinifera] (GB:CAO61797.1) | chr1:14030035-14032152 REVERSE no original description'
Glyma14g33670.N2	j	PAC:26287292	TSS53188	No	NO Cluster	AT1G36990	'35.2'	'not assigned.unknown'	'moderately similar to ( 268)AT1G36990| Symbols: | similar to unknown protein [Arabidopsis thaliana] (TAIR:AT4G08510.1); similar to unnamed protein product [Vitis vinifera] (GB:CAO61797.1) | chr1:14030035-14032152 REVERSE no original description'
Glyma08g23540.N2	j	PAC:26306326	TSS30687	Yes	81	AT1G80920	'20.2.1'	'stress.abiotic.heat'	'very weakly similar to (92.4)AT1G80920| Symbols: J8 | J8; heat shock protein binding / unfolded protein binding | chr1:30408755-30409441 REVERSE no original description'
Glyma08g23540.1	=	PAC:26306326	TSS30687	No	NO Cluster	AT1G80920	'20.2.1'	'stress.abiotic.heat'	'very weakly similar to (92.4)AT1G80920| Symbols: J8 | J8; heat shock protein binding / unfolded protein binding | chr1:30408755-30409441 REVERSE no original description'
Glyma13g40410.N4	x	PAC:26316341	TSS51595	No	NO Cluster	AT5G60210	'31.1'	'cell.organisation'	'moderately similar to ( 302)AT5G60210| Symbols: | cytoplasmic linker protein-related | chr5:24260755-24262858 REVERSE no original description'
Glyma13g40410.N3	j	PAC:26316341	TSS49069	No	NO Cluster	AT5G60210	'31.1'	'cell.organisation'	'moderately similar to ( 302)AT5G60210| Symbols: | cytoplasmic linker protein-related | chr5:24260755-24262858 REVERSE no original description'
Glyma13g40410.1	=	PAC:26316341	TSS49069	No	NO Cluster	AT5G60210	'31.1'	'cell.organisation'	'moderately similar to ( 302)AT5G60210| Symbols: | cytoplasmic linker protein-related | chr5:24260755-24262858 REVERSE no original description'
Glyma13g40410.N2	j	PAC:26316341	TSS49069	Yes	18	AT5G60210	'31.1'	'cell.organisation'	'moderately similar to ( 302)AT5G60210| Symbols: | cytoplasmic linker protein-related | chr5:24260755-24262858 REVERSE no original description'
Glyma01g44630.3	=	PAC:26323750	TSS1551	No	NO Cluster	AT3G22680	'35.2'	'not assigned.unknown'	'weakly similar to ( 184)AT3G22680| Symbols: | Identical to Uncharacterized protein At3g22680 [Arabidopsis Thaliana] (GB:Q9LUJ3;GB:Q84MD0); similar to unnamed protein product [Vitis vinifera] (GB:CAO71208.1); similar to Os06g0630300 [Oryza sativa (japonica cultivar-group)] (GB:NP_001058122.1); contains InterPro domain Protein of unknown function DUF1950 (InterPro:IPR015270) | chr3:8019792-8020381…
Glyma01g44630.4	=	PAC:26323751	TSS1551	Yes	34	AT3G22680	'35.2'	'not assigned.unknown'	'weakly similar to ( 184)AT3G22680| Symbols: | Identical to Uncharacterized protein At3g22680 [Arabidopsis Thaliana] (GB:Q9LUJ3;GB:Q84MD0); similar to unnamed protein product [Vitis vinifera] (GB:CAO71208.1); similar to Os06g0630300 [Oryza sativa (japonica cultivar-group)] (GB:NP_001058122.1); contains InterPro domain Protein of unknown function DUF1950 (InterPro:IPR015270) | chr3:8019792-8020381…
Glyma01g44630.N6	j	PAC:26323751	TSS1551	No	NO Cluster	AT3G22680	'35.2'	'not assigned.unknown'	'weakly similar to ( 184)AT3G22680| Symbols: | Identical to Uncharacterized protein At3g22680 [Arabidopsis Thaliana] (GB:Q9LUJ3;GB:Q84MD0); similar to unnamed protein product [Vitis vinifera] (GB:CAO71208.1); similar to Os06g0630300 [Oryza sativa (japonica cultivar-group)] (GB:NP_001058122.1); contains InterPro domain Protein of unknown function DUF1950 (InterPro:IPR015270) | chr3:8019792-8020381…
Glyma01g44630.N5	j	PAC:26323751	TSS1551	No	NO Cluster	AT3G22680	'35.2'	'not assigned.unknown'	'weakly similar to ( 184)AT3G22680| Symbols: | Identical to Uncharacterized protein At3g22680 [Arabidopsis Thaliana] (GB:Q9LUJ3;GB:Q84MD0); similar to unnamed protein product [Vitis vinifera] (GB:CAO71208.1); similar to Os06g0630300 [Oryza sativa (japonica cultivar-group)] (GB:NP_001058122.1); contains InterPro domain Protein of unknown function DUF1950 (InterPro:IPR015270) | chr3:8019792-8020381…
Glyma20g35580.1	=	PAC:26338491	TSS74821	Yes	112	AT4G10300	'35.2'	'not assigned.unknown'	'weakly similar to ( 175)AT4G10300| Symbols: | similar to unknown protein [Arabidopsis thaliana] (TAIR:AT3G04300.1); similar to unknown [Populus trichocarpa] (GB:ABK95374.1); contains InterPro domain RmlC-like jelly roll fold (InterPro:IPR014710); contains InterPro domain Protein of unknown function DUF861, cupin-3 (InterPro:IPR008579); contains InterPro domain Cupin, RmlC-type (InterPro:IPR01105…
Glyma20g35580.N3	j	PAC:26338491	TSS74821	No	NO Cluster	AT4G10300	'35.2'	'not assigned.unknown'	'weakly similar to ( 175)AT4G10300| Symbols: | similar to unknown protein [Arabidopsis thaliana] (TAIR:AT3G04300.1); similar to unknown [Populus trichocarpa] (GB:ABK95374.1); contains InterPro domain RmlC-like jelly roll fold (InterPro:IPR014710); contains InterPro domain Protein of unknown function DUF861, cupin-3 (InterPro:IPR008579); contains InterPro domain Cupin, RmlC-type (InterPro:IPR01105…
Glyma20g35580.N2	j	PAC:26338491	TSS74821	No	NO Cluster	AT4G10300	'35.2'	'not assigned.unknown'	'weakly similar to ( 175)AT4G10300| Symbols: | similar to unknown protein [Arabidopsis thaliana] (TAIR:AT3G04300.1); similar to unknown [Populus trichocarpa] (GB:ABK95374.1); contains InterPro domain RmlC-like jelly roll fold (InterPro:IPR014710); contains InterPro domain Protein of unknown function DUF861, cupin-3 (InterPro:IPR008579); contains InterPro domain Cupin, RmlC-type (InterPro:IPR01105…
Glyma11g02280.1	=	PAC:26295638	TSS40032	Yes	30	AT1G64080	'35.2'	'not assigned.unknown'	'weakly similar to ( 167)AT1G64080| Symbols: | similar to unnamed protein product [Vitis vinifera] (GB:CAO65893.1) | chr1:23788893-23790220 REVERSE no original description'
Glyma11g02280.N2	x	PAC:26295638	TSS41941	No	NO Cluster	AT1G64080	'35.2'	'not assigned.unknown'	'weakly similar to ( 167)AT1G64080| Symbols: | similar to unnamed protein product [Vitis vinifera] (GB:CAO65893.1) | chr1:23788893-23790220 REVERSE no original description'
Glyma12g32450.2	=	PAC:26294268	TSS46526	Yes	74	AT4G03230	'30.2.17'	'signalling.receptor kinases.DUF 26'	'highly similar to ( 747)AT4G03230| Symbols: | S-locus lectin protein kinase family protein | chr4:1419278-1422828 REVERSEmoderately similar to ( 291)KPRO_MAIZE no original description'
Glyma12g32450.N3	j	PAC:26294268	TSS46526	No	NO Cluster	AT4G03230	'30.2.17'	'signalling.receptor kinases.DUF 26'	'highly similar to ( 747)AT4G03230| Symbols: | S-locus lectin protein kinase family protein | chr4:1419278-1422828 REVERSEmoderately similar to ( 291)KPRO_MAIZE no original description'
Glyma12g32450.N4	j	PAC:26294268	TSS46526	No	NO Cluster	AT4G03230	'30.2.17'	'signalling.receptor kinases.DUF 26'	'highly similar to ( 747)AT4G03230| Symbols: | S-locus lectin protein kinase family protein | chr4:1419278-1422828 REVERSEmoderately similar to ( 291)KPRO_MAIZE no original description'
Glyma12g32450.N5	j	PAC:26294268	TSS46526	No	NO Cluster	AT4G03230	'30.2.17'	'signalling.receptor kinases.DUF 26'	'highly similar to ( 747)AT4G03230| Symbols: | S-locus lectin protein kinase family protein | chr4:1419278-1422828 REVERSEmoderately similar to ( 291)KPRO_MAIZE no original description'
Glyma06g08952.N8	j	PAC:26302533	TSS21116	No	NO Cluster	NO MapMan Annotation
Glyma06g08952.N7	j	PAC:26302533	TSS21116	No	NO Cluster	NO MapMan Annotation
Glyma06g08952.N6	j	PAC:26302533	TSS21116	No	NO Cluster	NO MapMan Annotation
Glyma06g08952.N5	j	PAC:26302533	TSS21116	No	NO Cluster	NO MapMan Annotation
Glyma06g08952.4	=	PAC:26302536	TSS21116	No	NO Cluster	NO MapMan Annotation
Glyma06g08952.3	=	PAC:26302535	TSS21116	No	NO Cluster	NO MapMan Annotation
Glyma06g08952.2	=	PAC:26302534	TSS21116	Yes	52	NO MapMan Annotation
Glyma06g08952.1	=	PAC:26302533	TSS21116	No	NO Cluster	NO MapMan Annotation
Glyma08g09480.1	=	PAC:26309596	TSS27205	Yes	39	AT5G45680	'29.8'	'protein.assembly and cofactor ligation'	'weakly similar to ( 198)AT5G45680| Symbols: | FK506-binding protein 1 (FKBP13) | chr5:18548121-18549355 FORWARDvery weakly similar to (82.4)FKB15_VICFA no original description'
Glyma08g09480.N2	j	PAC:26309596	TSS27205	No	NO Cluster	AT5G45680	'29.8'	'protein.assembly and cofactor ligation'	'weakly similar to ( 198)AT5G45680| Symbols: | FK506-binding protein 1 (FKBP13) | chr5:18548121-18549355 FORWARDvery weakly similar to (82.4)FKB15_VICFA no original description'
Glyma01g01840.2	=	PAC:26324488	TSS1718	Yes	38	No Arabidopsis Homolohue	'35.2'	'not assigned.unknown'	'no original description'
Glyma01g01840.1	=	PAC:26324487	TSS1718	No	NO Cluster	No Arabidopsis Homolohue	'35.2'	'not assigned.unknown'	'no original description'
Glyma01g01840.N3	j	PAC:26324487	TSS1718	No	NO Cluster	No Arabidopsis Homolohue	'35.2'	'not assigned.unknown'	'no original description'
Glyma19g36960.N3	j	PAC:26326699	TSS70966	No	NO Cluster	AT2G36835	'35.2'	'not assigned.unknown'	'weakly similar to ( 138)AT2G36835| Symbols: | similar to hypothetical protein [Vitis vinifera] (GB:CAN81061.1) | chr2:15456918-15458386 REVERSE no original description'
Glyma19g36960.N4	j	PAC:26326699	TSS70966	No	NO Cluster	AT2G36835	'35.2'	'not assigned.unknown'	'weakly similar to ( 138)AT2G36835| Symbols: | similar to hypothetical protein [Vitis vinifera] (GB:CAN81061.1) | chr2:15456918-15458386 REVERSE no original description'
Glyma19g36960.1	=	PAC:26326698	TSS70966	No	NO Cluster	AT2G36835	'35.2'	'not assigned.unknown'	'weakly similar to ( 138)AT2G36835| Symbols: | similar to hypothetical protein [Vitis vinifera] (GB:CAN81061.1) | chr2:15456918-15458386 REVERSE no original description'
Glyma19g36960.2	=	PAC:26326699	TSS70966	Yes	106	AT2G36835	'35.2'	'not assigned.unknown'	'weakly similar to ( 138)AT2G36835| Symbols: | similar to hypothetical protein [Vitis vinifera] (GB:CAN81061.1) | chr2:15456918-15458386 REVERSE no original description'
Glyma14g10180.N9	j	PAC:26284921	TSS52671	No	NO Cluster	AT1G10120	'27.3.6'	'RNA.regulation of transcription.bHLH,Basic Helix-Loop-Helix family'	'moderately similar to ( 223)AT1G10120| Symbols: | DNA binding / transcription factor | chr1:3304230-3305986 REVERSE no original description'
Glyma14g10180.N8	j	PAC:26284921	TSS52671	No	NO Cluster	AT1G10120	'27.3.6'	'RNA.regulation of transcription.bHLH,Basic Helix-Loop-Helix family'	'moderately similar to ( 223)AT1G10120| Symbols: | DNA binding / transcription factor | chr1:3304230-3305986 REVERSE no original description'
Glyma14g10180.1	=	PAC:26284921	TSS52671	Yes	36	AT1G10120	'27.3.6'	'RNA.regulation of transcription.bHLH,Basic Helix-Loop-Helix family'	'moderately similar to ( 223)AT1G10120| Symbols: | DNA binding / transcription factor | chr1:3304230-3305986 REVERSE no original description'
Glyma14g10180.N4	j	PAC:26284921	TSS52670	No	NO Cluster	AT1G10120	'27.3.6'	'RNA.regulation of transcription.bHLH,Basic Helix-Loop-Helix family'	'moderately similar to ( 223)AT1G10120| Symbols: | DNA binding / transcription factor | chr1:3304230-3305986 REVERSE no original description'
Glyma14g10180.N5	j	PAC:26284921	TSS52670	No	NO Cluster	AT1G10120	'27.3.6'	'RNA.regulation of transcription.bHLH,Basic Helix-Loop-Helix family'	'moderately similar to ( 223)AT1G10120| Symbols: | DNA binding / transcription factor | chr1:3304230-3305986 REVERSE no original description'
Glyma14g10180.N2	j	PAC:26284921	TSS52670	No	NO Cluster	AT1G10120	'27.3.6'	'RNA.regulation of transcription.bHLH,Basic Helix-Loop-Helix family'	'moderately similar to ( 223)AT1G10120| Symbols: | DNA binding / transcription factor | chr1:3304230-3305986 REVERSE no original description'
Glyma14g10180.N3	j	PAC:26284921	TSS52670	No	NO Cluster	AT1G10120	'27.3.6'	'RNA.regulation of transcription.bHLH,Basic Helix-Loop-Helix family'	'moderately similar to ( 223)AT1G10120| Symbols: | DNA binding / transcription factor | chr1:3304230-3305986 REVERSE no original description'
Glyma14g10180.N6	j	PAC:26284921	TSS52671	No	NO Cluster	AT1G10120	'27.3.6'	'RNA.regulation of transcription.bHLH,Basic Helix-Loop-Helix family'	'moderately similar to ( 223)AT1G10120| Symbols: | DNA binding / transcription factor | chr1:3304230-3305986 REVERSE no original description'
Glyma14g10180.N7	j	PAC:26284921	TSS52671	No	NO Cluster	AT1G10120	'27.3.6'	'RNA.regulation of transcription.bHLH,Basic Helix-Loop-Helix family'	'moderately similar to ( 223)AT1G10120| Symbols: | DNA binding / transcription factor | chr1:3304230-3305986 REVERSE no original description'
Glyma09g07400.N4	j	PAC:26343489	TSS34108	No	NO Cluster	AT2G19490	'28.1'	'DNA.synthesis/chromatin structure'	'highly similar to ( 503)AT2G19490| Symbols: | recA family protein | chr2:8448814-8451088 FORWARD no original description'
Glyma09g07400.1	=	PAC:26343489	TSS34108	Yes	15	AT2G19490	'28.1'	'DNA.synthesis/chromatin structure'	'highly similar to ( 503)AT2G19490| Symbols: | recA family protein | chr2:8448814-8451088 FORWARD no original description'
Glyma09g07400.N2	j	PAC:26343489	TSS34108	No	NO Cluster	AT2G19490	'28.1'	'DNA.synthesis/chromatin structure'	'highly similar to ( 503)AT2G19490| Symbols: | recA family protein | chr2:8448814-8451088 FORWARD no original description'
Glyma09g07400.N3	j	PAC:26343489	TSS34108	No	NO Cluster	AT2G19490	'28.1'	'DNA.synthesis/chromatin structure'	'highly similar to ( 503)AT2G19490| Symbols: | recA family protein | chr2:8448814-8451088 FORWARD no original description'
Glyma02g02620.N2	x	PAC:26290692	TSS3482	Yes	31	AT1G69850	'34.13'	'transport.peptides and oligopeptides'	'highly similar to ( 715)AT1G69850| Symbols: NTL1, ATNRT1:2 | ATNRT1:2 (NITRATE TRANSPORTER 1:2); calcium ion binding / transporter | chr1:26300608-26304070 REVERSE no original description'
Glyma02g02620.1	=	PAC:26290692	TSS5539	No	NO Cluster	AT1G69850	'34.13'	'transport.peptides and oligopeptides'	'highly similar to ( 715)AT1G69850| Symbols: NTL1, ATNRT1:2 | ATNRT1:2 (NITRATE TRANSPORTER 1:2); calcium ion binding / transporter | chr1:26300608-26304070 REVERSE no original description'
Glyma02g02620.N3	j	PAC:26290692	TSS5539	No	NO Cluster	AT1G69850	'34.13'	'transport.peptides and oligopeptides'	'highly similar to ( 715)AT1G69850| Symbols: NTL1, ATNRT1:2 | ATNRT1:2 (NITRATE TRANSPORTER 1:2); calcium ion binding / transporter | chr1:26300608-26304070 REVERSE no original description'
Glyma04g24430.1	=	PAC:26303676	TSS13970	Yes	99	AT4G28080	'35.2'	'not assigned.unknown'	'nearly identical (1128)AT4G28080| Symbols: | binding | chr4:13948999-13956718 REVERSE no original description'
Glyma04g24430.N11	j	PAC:26303676	TSS13970	No	NO Cluster	AT4G28080	'35.2'	'not assigned.unknown'	'nearly identical (1128)AT4G28080| Symbols: | binding | chr4:13948999-13956718 REVERSE no original description'
Glyma04g24430.N7	j	PAC:26303676	TSS13968	No	NO Cluster	AT4G28080	'35.2'	'not assigned.unknown'	'nearly identical (1128)AT4G28080| Symbols: | binding | chr4:13948999-13956718 REVERSE no original description'
Glyma04g24430.N10	j	PAC:26303676	TSS13970	No	NO Cluster	AT4G28080	'35.2'	'not assigned.unknown'	'nearly identical (1128)AT4G28080| Symbols: | binding | chr4:13948999-13956718 REVERSE no original description'
Glyma04g24430.N9	j	PAC:26303676	TSS13969	No	NO Cluster	AT4G28080	'35.2'	'not assigned.unknown'	'nearly identical (1128)AT4G28080| Symbols: | binding | chr4:13948999-13956718 REVERSE no original description'
Glyma04g24430.N4	j	PAC:26303676	TSS13967	No	NO Cluster	AT4G28080	'35.2'	'not assigned.unknown'	'nearly identical (1128)AT4G28080| Symbols: | binding | chr4:13948999-13956718 REVERSE no original description'
Glyma04g24430.N3	j	PAC:26303676	TSS13967	No	NO Cluster	AT4G28080	'35.2'	'not assigned.unknown'	'nearly identical (1128)AT4G28080| Symbols: | binding | chr4:13948999-13956718 REVERSE no original description'
Glyma04g24430.N6	j	PAC:26303676	TSS13967	No	NO Cluster	AT4G28080	'35.2'	'not assigned.unknown'	'nearly identical (1128)AT4G28080| Symbols: | binding | chr4:13948999-13956718 REVERSE no original description'
Glyma04g24430.N5	j	PAC:26303676	TSS13967	No	NO Cluster	AT4G28080	'35.2'	'not assigned.unknown'	'nearly identical (1128)AT4G28080| Symbols: | binding | chr4:13948999-13956718 REVERSE no original description'
Glyma04g24430.N2	j	PAC:26303676	TSS13966	No	NO Cluster	AT4G28080	'35.2'	'not assigned.unknown'	'nearly identical (1128)AT4G28080| Symbols: | binding | chr4:13948999-13956718 REVERSE no original description'
Glyma04g24430.N8	j	PAC:26303676	TSS13968	No	NO Cluster	AT4G28080	'35.2'	'not assigned.unknown'	'nearly identical (1128)AT4G28080| Symbols: | binding | chr4:13948999-13956718 REVERSE no original description'
Glyma12g08210.N11	j	PAC:26292073	TSS45739	No	NO Cluster	AT2G28250	'29.4.1.57'	'protein.postranslational modification.kinase.receptor like cytoplasmatic kinase VII'	'highly similar to ( 555)AT2G28250| Symbols: NCRK | protein kinase family protein | chr2:12051081-12053416 FORWARDmoderately similar to ( 209)NORK_MEDTR no original description'
Glyma12g08210.N10	j	PAC:26292073	TSS45739	No	NO Cluster	AT2G28250	'29.4.1.57'	'protein.postranslational modification.kinase.receptor like cytoplasmatic kinase VII'	'highly similar to ( 555)AT2G28250| Symbols: NCRK | protein kinase family protein | chr2:12051081-12053416 FORWARDmoderately similar to ( 209)NORK_MEDTR no original description'
Glyma12g08210.3	=	PAC:26292074	TSS45739	Yes	43	AT2G28250	'29.4.1.57'	'protein.postranslational modification.kinase.receptor like cytoplasmatic kinase VII'	'highly similar to ( 555)AT2G28250| Symbols: NCRK | protein kinase family protein | chr2:12051081-12053416 FORWARDmoderately similar to ( 209)NORK_MEDTR no original description'
Glyma12g08210.N9	j	PAC:26292073	TSS45739	No	NO Cluster	AT2G28250	'29.4.1.57'	'protein.postranslational modification.kinase.receptor like cytoplasmatic kinase VII'	'highly similar to ( 555)AT2G28250| Symbols: NCRK | protein kinase family protein | chr2:12051081-12053416 FORWARDmoderately similar to ( 209)NORK_MEDTR no original description'
Glyma12g08210.4	=	PAC:26292075	TSS45740	No	NO Cluster	AT2G28250	'29.4.1.57'	'protein.postranslational modification.kinase.receptor like cytoplasmatic kinase VII'	'highly similar to ( 555)AT2G28250| Symbols: NCRK | protein kinase family protein | chr2:12051081-12053416 FORWARDmoderately similar to ( 209)NORK_MEDTR no original description'
Glyma12g08210.2	=	PAC:26292073	TSS45740	No	NO Cluster	AT2G28250	'29.4.1.57'	'protein.postranslational modification.kinase.receptor like cytoplasmatic kinase VII'	'highly similar to ( 555)AT2G28250| Symbols: NCRK | protein kinase family protein | chr2:12051081-12053416 FORWARDmoderately similar to ( 209)NORK_MEDTR no original description'
Glyma12g08210.N13	j	PAC:26292073	TSS45739	No	NO Cluster	AT2G28250	'29.4.1.57'	'protein.postranslational modification.kinase.receptor like cytoplasmatic kinase VII'	'highly similar to ( 555)AT2G28250| Symbols: NCRK | protein kinase family protein | chr2:12051081-12053416 FORWARDmoderately similar to ( 209)NORK_MEDTR no original description'
Glyma12g08210.N12	j	PAC:26292073	TSS45739	No	NO Cluster	AT2G28250	'29.4.1.57'	'protein.postranslational modification.kinase.receptor like cytoplasmatic kinase VII'	'highly similar to ( 555)AT2G28250| Symbols: NCRK | protein kinase family protein | chr2:12051081-12053416 FORWARDmoderately similar to ( 209)NORK_MEDTR no original description'
Glyma12g08210.N14	j	PAC:26292073	TSS45741	No	NO Cluster	AT2G28250	'29.4.1.57'	'protein.postranslational modification.kinase.receptor like cytoplasmatic kinase VII'	'highly similar to ( 555)AT2G28250| Symbols: NCRK | protein kinase family protein | chr2:12051081-12053416 FORWARDmoderately similar to ( 209)NORK_MEDTR no original description'
Glyma12g08210.5	=	PAC:26292076	TSS45740	No	NO Cluster	AT2G28250	'29.4.1.57'	'protein.postranslational modification.kinase.receptor like cytoplasmatic kinase VII'	'highly similar to ( 555)AT2G28250| Symbols: NCRK | protein kinase family protein | chr2:12051081-12053416 FORWARDmoderately similar to ( 209)NORK_MEDTR no original description'
Glyma12g08210.N8	j	PAC:26292073	TSS45738	No	NO Cluster	AT2G28250	'29.4.1.57'	'protein.postranslational modification.kinase.receptor like cytoplasmatic kinase VII'	'highly similar to ( 555)AT2G28250| Symbols: NCRK | protein kinase family protein | chr2:12051081-12053416 FORWARDmoderately similar to ( 209)NORK_MEDTR no original description'
Glyma12g08210.N7	s	PAC:26292074	TSS44192	No	NO Cluster	AT2G28250	'29.4.1.57'	'protein.postranslational modification.kinase.receptor like cytoplasmatic kinase VII'	'highly similar to ( 555)AT2G28250| Symbols: NCRK | protein kinase family protein | chr2:12051081-12053416 FORWARDmoderately similar to ( 209)NORK_MEDTR no original description'
Glyma12g08210.N6	s	PAC:26292074	TSS44192	No	NO Cluster	AT2G28250	'29.4.1.57'	'protein.postranslational modification.kinase.receptor like cytoplasmatic kinase VII'	'highly similar to ( 555)AT2G28250| Symbols: NCRK | protein kinase family protein | chr2:12051081-12053416 FORWARDmoderately similar to ( 209)NORK_MEDTR no original description'
Glyma08g05480.N2	j	PAC:26308976	TSS26929	No	NO Cluster	AT1G48650	'28.1'	'DNA.synthesis/chromatin structure'	'nearly identical (1613)AT1G48650| Symbols: | helicase domain-containing protein | chr1:17993338-17998837 REVERSE no original description'
Glyma08g05480.N3	j	PAC:26308976	TSS26929	No	NO Cluster	AT1G48650	'28.1'	'DNA.synthesis/chromatin structure'	'nearly identical (1613)AT1G48650| Symbols: | helicase domain-containing protein | chr1:17993338-17998837 REVERSE no original description'
Glyma08g05480.1	=	PAC:26308976	TSS26929	Yes	60	AT1G48650	'28.1'	'DNA.synthesis/chromatin structure'	'nearly identical (1613)AT1G48650| Symbols: | helicase domain-containing protein | chr1:17993338-17998837 REVERSE no original description'
Glyma08g05480.N9	j	PAC:26308976	TSS26929	No	NO Cluster	AT1G48650	'28.1'	'DNA.synthesis/chromatin structure'	'nearly identical (1613)AT1G48650| Symbols: | helicase domain-containing protein | chr1:17993338-17998837 REVERSE no original description'
Glyma08g05480.N8	j	PAC:26308976	TSS26929	No	NO Cluster	AT1G48650	'28.1'	'DNA.synthesis/chromatin structure'	'nearly identical (1613)AT1G48650| Symbols: | helicase domain-containing protein | chr1:17993338-17998837 REVERSE no original description'
Glyma08g05480.N7	j	PAC:26308976	TSS26929	No	NO Cluster	AT1G48650	'28.1'	'DNA.synthesis/chromatin structure'	'nearly identical (1613)AT1G48650| Symbols: | helicase domain-containing protein | chr1:17993338-17998837 REVERSE no original description'
Glyma08g05480.N6	j	PAC:26308976	TSS26929	No	NO Cluster	AT1G48650	'28.1'	'DNA.synthesis/chromatin structure'	'nearly identical (1613)AT1G48650| Symbols: | helicase domain-containing protein | chr1:17993338-17998837 REVERSE no original description'
Glyma08g05480.N5	j	PAC:26308976	TSS26929	No	NO Cluster	AT1G48650	'28.1'	'DNA.synthesis/chromatin structure'	'nearly identical (1613)AT1G48650| Symbols: | helicase domain-containing protein | chr1:17993338-17998837 REVERSE no original description'
Glyma08g05480.N4	j	PAC:26308976	TSS26929	No	NO Cluster	AT1G48650	'28.1'	'DNA.synthesis/chromatin structure'	'nearly identical (1613)AT1G48650| Symbols: | helicase domain-containing protein | chr1:17993338-17998837 REVERSE no original description'
Glyma08g00300.N2	j	PAC:26308242	TSS29253	No	NO Cluster	AT3G55010	'23.1.2.5'	'nucleotide metabolism.synthesis.purine.AIR synthase'	'moderately similar to ( 474)AT3G55010| Symbols: ATPURM, PUR5 | ATPURM/PUR5; phosphoribosylformylglycinamidine cyclo-ligase | chr3:20397795-20399526 FORWARDhighly similar to ( 629)PUR5_VIGUN no original description'
Glyma08g00300.N3	j	PAC:26308242	TSS29253	No	NO Cluster	AT3G55010	'23.1.2.5'	'nucleotide metabolism.synthesis.purine.AIR synthase'	'moderately similar to ( 474)AT3G55010| Symbols: ATPURM, PUR5 | ATPURM/PUR5; phosphoribosylformylglycinamidine cyclo-ligase | chr3:20397795-20399526 FORWARDhighly similar to ( 629)PUR5_VIGUN no original description'
Glyma08g00300.N7	j	PAC:26308242	TSS29253	No	NO Cluster	AT3G55010	'23.1.2.5'	'nucleotide metabolism.synthesis.purine.AIR synthase'	'moderately similar to ( 474)AT3G55010| Symbols: ATPURM, PUR5 | ATPURM/PUR5; phosphoribosylformylglycinamidine cyclo-ligase | chr3:20397795-20399526 FORWARDhighly similar to ( 629)PUR5_VIGUN no original description'
Glyma08g00300.N6	j	PAC:26308242	TSS29253	No	NO Cluster	AT3G55010	'23.1.2.5'	'nucleotide metabolism.synthesis.purine.AIR synthase'	'moderately similar to ( 474)AT3G55010| Symbols: ATPURM, PUR5 | ATPURM/PUR5; phosphoribosylformylglycinamidine cyclo-ligase | chr3:20397795-20399526 FORWARDhighly similar to ( 629)PUR5_VIGUN no original description'
Glyma08g00300.1	=	PAC:26308242	TSS29253	Yes	75	AT3G55010	'23.1.2.5'	'nucleotide metabolism.synthesis.purine.AIR synthase'	'moderately similar to ( 474)AT3G55010| Symbols: ATPURM, PUR5 | ATPURM/PUR5; phosphoribosylformylglycinamidine cyclo-ligase | chr3:20397795-20399526 FORWARDhighly similar to ( 629)PUR5_VIGUN no original description'
Glyma08g00300.N4	j	PAC:26308242	TSS29253	No	NO Cluster	AT3G55010	'23.1.2.5'	'nucleotide metabolism.synthesis.purine.AIR synthase'	'moderately similar to ( 474)AT3G55010| Symbols: ATPURM, PUR5 | ATPURM/PUR5; phosphoribosylformylglycinamidine cyclo-ligase | chr3:20397795-20399526 FORWARDhighly similar to ( 629)PUR5_VIGUN no original description'
Glyma08g00300.N5	j	PAC:26308242	TSS29253	No	NO Cluster	AT3G55010	'23.1.2.5'	'nucleotide metabolism.synthesis.purine.AIR synthase'	'moderately similar to ( 474)AT3G55010| Symbols: ATPURM, PUR5 | ATPURM/PUR5; phosphoribosylformylglycinamidine cyclo-ligase | chr3:20397795-20399526 FORWARDhighly similar to ( 629)PUR5_VIGUN no original description'
Glyma10g03910.3	=	PAC:26346535	TSS35899	Yes	55	AT3G04610	'27.4'	'RNA.RNA binding'	'moderately similar to ( 352)AT3G04610| Symbols: FLK | FLK (FLOWERING LOCUS KH DOMAIN); nucleic acid binding | chr3:1250768-1254278 REVERSE no original description'
Glyma10g03910.2	=	PAC:26346537	TSS35899	No	NO Cluster	AT3G04610	'27.4'	'RNA.RNA binding'	'moderately similar to ( 352)AT3G04610| Symbols: FLK | FLK (FLOWERING LOCUS KH DOMAIN); nucleic acid binding | chr3:1250768-1254278 REVERSE no original description'
Glyma10g03910.N23	x	PAC:26346536	TSS37994	No	NO Cluster	AT3G04610	'27.4'	'RNA.RNA binding'	'moderately similar to ( 352)AT3G04610| Symbols: FLK | FLK (FLOWERING LOCUS KH DOMAIN); nucleic acid binding | chr3:1250768-1254278 REVERSE no original description'
Glyma10g03910.N17	j	PAC:26346536	TSS35899	No	NO Cluster	AT3G04610	'27.4'	'RNA.RNA binding'	'moderately similar to ( 352)AT3G04610| Symbols: FLK | FLK (FLOWERING LOCUS KH DOMAIN); nucleic acid binding | chr3:1250768-1254278 REVERSE no original description'
Glyma10g03910.N16	j	PAC:26346536	TSS35899	No	NO Cluster	AT3G04610	'27.4'	'RNA.RNA binding'	'moderately similar to ( 352)AT3G04610| Symbols: FLK | FLK (FLOWERING LOCUS KH DOMAIN); nucleic acid binding | chr3:1250768-1254278 REVERSE no original description'
Glyma10g03910.N14	j	PAC:26346536	TSS35899	No	NO Cluster	AT3G04610	'27.4'	'RNA.RNA binding'	'moderately similar to ( 352)AT3G04610| Symbols: FLK | FLK (FLOWERING LOCUS KH DOMAIN); nucleic acid binding | chr3:1250768-1254278 REVERSE no original description'
Glyma10g03910.N20	j	PAC:26346536	TSS35899	No	NO Cluster	AT3G04610	'27.4'	'RNA.RNA binding'	'moderately similar to ( 352)AT3G04610| Symbols: FLK | FLK (FLOWERING LOCUS KH DOMAIN); nucleic acid binding | chr3:1250768-1254278 REVERSE no original description'
Glyma10g03910.N19	j	PAC:26346536	TSS35899	No	NO Cluster	AT3G04610	'27.4'	'RNA.RNA binding'	'moderately similar to ( 352)AT3G04610| Symbols: FLK | FLK (FLOWERING LOCUS KH DOMAIN); nucleic acid binding | chr3:1250768-1254278 REVERSE no original description'
Glyma10g03910.N9	j	PAC:26346536	TSS35899	No	NO Cluster	AT3G04610	'27.4'	'RNA.RNA binding'	'moderately similar to ( 352)AT3G04610| Symbols: FLK | FLK (FLOWERING LOCUS KH DOMAIN); nucleic acid binding | chr3:1250768-1254278 REVERSE no original description'
Glyma10g03910.N7	j	PAC:26346536	TSS35899	No	NO Cluster	AT3G04610	'27.4'	'RNA.RNA binding'	'moderately similar to ( 352)AT3G04610| Symbols: FLK | FLK (FLOWERING LOCUS KH DOMAIN); nucleic acid binding | chr3:1250768-1254278 REVERSE no original description'
Glyma10g03910.N5	j	PAC:26346536	TSS35899	No	NO Cluster	AT3G04610	'27.4'	'RNA.RNA binding'	'moderately similar to ( 352)AT3G04610| Symbols: FLK | FLK (FLOWERING LOCUS KH DOMAIN); nucleic acid binding | chr3:1250768-1254278 REVERSE no original description'
Glyma10g03910.N6	j	PAC:26346536	TSS35899	No	NO Cluster	AT3G04610	'27.4'	'RNA.RNA binding'	'moderately similar to ( 352)AT3G04610| Symbols: FLK | FLK (FLOWERING LOCUS KH DOMAIN); nucleic acid binding | chr3:1250768-1254278 REVERSE no original description'
Glyma10g03910.N4	j	PAC:26346536	TSS35899	No	NO Cluster	AT3G04610	'27.4'	'RNA.RNA binding'	'moderately similar to ( 352)AT3G04610| Symbols: FLK | FLK (FLOWERING LOCUS KH DOMAIN); nucleic acid binding | chr3:1250768-1254278 REVERSE no original description'
Glyma13g05310.2	=	PAC:26317047	TSS47112	No	NO Cluster	AT1G26830	'29.5.11.4.5.1'	'protein.degradation.ubiquitin.E3.BTB/POZ Cullin3.Cullin3'	'nearly identical (1091)AT1G26830| Symbols: CUL3A, ATCUL3A, ATCUL3, CUL3 | ATCUL3/ATCUL3A/CUL3/CUL3A (Cullin 3A); protein binding / ubiquitin-protein ligase | chr1:9296050-9298361 FORWARD no original description'
Glyma13g05310.2	=	PAC:26317047	TSS47111	No	NO Cluster	AT1G26830	'29.5.11.4.5.1'	'protein.degradation.ubiquitin.E3.BTB/POZ Cullin3.Cullin3'	'nearly identical (1091)AT1G26830| Symbols: CUL3A, ATCUL3A, ATCUL3, CUL3 | ATCUL3/ATCUL3A/CUL3/CUL3A (Cullin 3A); protein binding / ubiquitin-protein ligase | chr1:9296050-9298361 FORWARD no original description'
Glyma13g05310.1	=	PAC:26317048	TSS47111	Yes	71	AT1G26830	'29.5.11.4.5.1'	'protein.degradation.ubiquitin.E3.BTB/POZ Cullin3.Cullin3'	'nearly identical (1091)AT1G26830| Symbols: CUL3A, ATCUL3A, ATCUL3, CUL3 | ATCUL3/ATCUL3A/CUL3/CUL3A (Cullin 3A); protein binding / ubiquitin-protein ligase | chr1:9296050-9298361 FORWARD no original description'
Glyma18g35370.N4	j	PAC:26354418	TSS68669	No	NO Cluster	AT5G56420	'29.5.11.4.3.2'	'protein.degradation.ubiquitin.E3.SCF.FBOX'	'weakly similar to ( 147)AT5G56420| Symbols: | F-box family protein | chr5:22868089-22869560 REVERSE no original description'
Glyma18g35370.N3	j	PAC:26354418	TSS68669	No	NO Cluster	AT5G56420	'29.5.11.4.3.2'	'protein.degradation.ubiquitin.E3.SCF.FBOX'	'weakly similar to ( 147)AT5G56420| Symbols: | F-box family protein | chr5:22868089-22869560 REVERSE no original description'
Glyma18g35370.N2	j	PAC:26354418	TSS68668	No	NO Cluster	AT5G56420	'29.5.11.4.3.2'	'protein.degradation.ubiquitin.E3.SCF.FBOX'	'weakly similar to ( 147)AT5G56420| Symbols: | F-box family protein | chr5:22868089-22869560 REVERSE no original description'
Glyma18g35370.1	=	PAC:26354418	TSS68669	Yes	62	AT5G56420	'29.5.11.4.3.2'	'protein.degradation.ubiquitin.E3.SCF.FBOX'	'weakly similar to ( 147)AT5G56420| Symbols: | F-box family protein | chr5:22868089-22869560 REVERSE no original description'
Glyma18g35370.N6	j	PAC:26354418	TSS68669	No	NO Cluster	AT5G56420	'29.5.11.4.3.2'	'protein.degradation.ubiquitin.E3.SCF.FBOX'	'weakly similar to ( 147)AT5G56420| Symbols: | F-box family protein | chr5:22868089-22869560 REVERSE no original description'
Glyma18g35370.N5	j	PAC:26354418	TSS68669	No	NO Cluster	AT5G56420	'29.5.11.4.3.2'	'protein.degradation.ubiquitin.E3.SCF.FBOX'	'weakly similar to ( 147)AT5G56420| Symbols: | F-box family protein | chr5:22868089-22869560 REVERSE no original description'
Glyma08g06460.N2	j	PAC:26306353	TSS29634	Yes	35	AT4G21430	'29.5.11.4.2'	'protein.degradation.ubiquitin.E3.RING'	'highly similar to ( 626)AT4G21430| Symbols: B160 | B160; transcription factor | chr4:11407846-11412170 REVERSE no original description'
Glyma08g06460.N3	j	PAC:26306353	TSS29634	No	NO Cluster	AT4G21430	'29.5.11.4.2'	'protein.degradation.ubiquitin.E3.RING'	'highly similar to ( 626)AT4G21430| Symbols: B160 | B160; transcription factor | chr4:11407846-11412170 REVERSE no original description'
Glyma08g06460.1	=	PAC:26306353	TSS29634	No	NO Cluster	AT4G21430	'29.5.11.4.2'	'protein.degradation.ubiquitin.E3.RING'	'highly similar to ( 626)AT4G21430| Symbols: B160 | B160; transcription factor | chr4:11407846-11412170 REVERSE no original description'
Glyma05g31920.1	=	PAC:26320301	TSS17760	No	NO Cluster	AT5G22510	'2.2.1.3.1'	'major CHO metabolism.degradation.sucrose.invertases.neutral'	'highly similar to ( 904)AT5G22510| Symbols: | beta-fructofuranosidase, putative / invertase, putative / saccharase, putative / beta-fructosidase, putative | chr5:7474977-7477482 REVERSE no original description'
Glyma05g31920.2	=	PAC:26320300	TSS17760	No	NO Cluster	AT5G22510	'2.2.1.3.1'	'major CHO metabolism.degradation.sucrose.invertases.neutral'	'highly similar to ( 904)AT5G22510| Symbols: | beta-fructofuranosidase, putative / invertase, putative / saccharase, putative / beta-fructosidase, putative | chr5:7474977-7477482 REVERSE no original description'
Glyma05g31920.N11	j	PAC:26320300	TSS17760	No	NO Cluster	AT5G22510	'2.2.1.3.1'	'major CHO metabolism.degradation.sucrose.invertases.neutral'	'highly similar to ( 904)AT5G22510| Symbols: | beta-fructofuranosidase, putative / invertase, putative / saccharase, putative / beta-fructosidase, putative | chr5:7474977-7477482 REVERSE no original description'
Glyma05g31920.N9	j	PAC:26320300	TSS17760	No	NO Cluster	AT5G22510	'2.2.1.3.1'	'major CHO metabolism.degradation.sucrose.invertases.neutral'	'highly similar to ( 904)AT5G22510| Symbols: | beta-fructofuranosidase, putative / invertase, putative / saccharase, putative / beta-fructosidase, putative | chr5:7474977-7477482 REVERSE no original description'
Glyma05g31920.N10	j	PAC:26320300	TSS17760	No	NO Cluster	AT5G22510	'2.2.1.3.1'	'major CHO metabolism.degradation.sucrose.invertases.neutral'	'highly similar to ( 904)AT5G22510| Symbols: | beta-fructofuranosidase, putative / invertase, putative / saccharase, putative / beta-fructosidase, putative | chr5:7474977-7477482 REVERSE no original description'
Glyma05g31920.N5	j	PAC:26320300	TSS17760	No	NO Cluster	AT5G22510	'2.2.1.3.1'	'major CHO metabolism.degradation.sucrose.invertases.neutral'	'highly similar to ( 904)AT5G22510| Symbols: | beta-fructofuranosidase, putative / invertase, putative / saccharase, putative / beta-fructosidase, putative | chr5:7474977-7477482 REVERSE no original description'
Glyma05g31920.N6	j	PAC:26320300	TSS17760	No	NO Cluster	AT5G22510	'2.2.1.3.1'	'major CHO metabolism.degradation.sucrose.invertases.neutral'	'highly similar to ( 904)AT5G22510| Symbols: | beta-fructofuranosidase, putative / invertase, putative / saccharase, putative / beta-fructosidase, putative | chr5:7474977-7477482 REVERSE no original description'
Glyma05g31920.N7	j	PAC:26320300	TSS17760	No	NO Cluster	AT5G22510	'2.2.1.3.1'	'major CHO metabolism.degradation.sucrose.invertases.neutral'	'highly similar to ( 904)AT5G22510| Symbols: | beta-fructofuranosidase, putative / invertase, putative / saccharase, putative / beta-fructosidase, putative | chr5:7474977-7477482 REVERSE no original description'
Glyma05g31920.N8	j	PAC:26320300	TSS17760	No	NO Cluster	AT5G22510	'2.2.1.3.1'	'major CHO metabolism.degradation.sucrose.invertases.neutral'	'highly similar to ( 904)AT5G22510| Symbols: | beta-fructofuranosidase, putative / invertase, putative / saccharase, putative / beta-fructosidase, putative | chr5:7474977-7477482 REVERSE no original description'
Glyma05g31920.N3	j	PAC:26320300	TSS17760	Yes	71	AT5G22510	'2.2.1.3.1'	'major CHO metabolism.degradation.sucrose.invertases.neutral'	'highly similar to ( 904)AT5G22510| Symbols: | beta-fructofuranosidase, putative / invertase, putative / saccharase, putative / beta-fructosidase, putative | chr5:7474977-7477482 REVERSE no original description'
Glyma05g31920.N4	j	PAC:26320300	TSS17760	No	NO Cluster	AT5G22510	'2.2.1.3.1'	'major CHO metabolism.degradation.sucrose.invertases.neutral'	'highly similar to ( 904)AT5G22510| Symbols: | beta-fructofuranosidase, putative / invertase, putative / saccharase, putative / beta-fructosidase, putative | chr5:7474977-7477482 REVERSE no original description'
Glyma17g12050.N3	j	PAC:26312641	TSS64615	No	NO Cluster	AT5G32440	'28.1'	'DNA.synthesis/chromatin structure'	'weakly similar to ( 121)AT5G32440| Symbols: | similar to unknown [Populus trichocarpa] (GB:ABK93674.1); contains InterPro domain Ubiquitin system component Cue (InterPro:IPR003892); contains InterPro domain UBA-like (InterPro:IPR009060) | chr5:12094244-12095321 FORWARD no original description'
Glyma17g12050.N4	j	PAC:26312641	TSS64615	No	NO Cluster	AT5G32440	'28.1'	'DNA.synthesis/chromatin structure'	'weakly similar to ( 121)AT5G32440| Symbols: | similar to unknown [Populus trichocarpa] (GB:ABK93674.1); contains InterPro domain Ubiquitin system component Cue (InterPro:IPR003892); contains InterPro domain UBA-like (InterPro:IPR009060) | chr5:12094244-12095321 FORWARD no original description'
Glyma17g12050.N5	j	PAC:26312641	TSS64615	Yes	110	AT5G32440	'28.1'	'DNA.synthesis/chromatin structure'	'weakly similar to ( 121)AT5G32440| Symbols: | similar to unknown [Populus trichocarpa] (GB:ABK93674.1); contains InterPro domain Ubiquitin system component Cue (InterPro:IPR003892); contains InterPro domain UBA-like (InterPro:IPR009060) | chr5:12094244-12095321 FORWARD no original description'
Glyma17g12050.N6	j	PAC:26312641	TSS64615	No	NO Cluster	AT5G32440	'28.1'	'DNA.synthesis/chromatin structure'	'weakly similar to ( 121)AT5G32440| Symbols: | similar to unknown [Populus trichocarpa] (GB:ABK93674.1); contains InterPro domain Ubiquitin system component Cue (InterPro:IPR003892); contains InterPro domain UBA-like (InterPro:IPR009060) | chr5:12094244-12095321 FORWARD no original description'
Glyma13g06840.N6	j	PAC:26317660	TSS49786	No	NO Cluster	AT5G15790	'29.5.11.4.2'	'protein.degradation.ubiquitin.E3.RING'	'moderately similar to ( 254)AT5G15790| Symbols: | zinc finger (C3HC4-type RING finger) family protein | chr5:5149803-5150967 FORWARD no original description'
Glyma13g06840.N5	j	PAC:26317660	TSS49786	No	NO Cluster	AT5G15790	'29.5.11.4.2'	'protein.degradation.ubiquitin.E3.RING'	'moderately similar to ( 254)AT5G15790| Symbols: | zinc finger (C3HC4-type RING finger) family protein | chr5:5149803-5150967 FORWARD no original description'
Glyma13g06840.N8	j	PAC:26317660	TSS49787	No	NO Cluster	AT5G15790	'29.5.11.4.2'	'protein.degradation.ubiquitin.E3.RING'	'moderately similar to ( 254)AT5G15790| Symbols: | zinc finger (C3HC4-type RING finger) family protein | chr5:5149803-5150967 FORWARD no original description'
Glyma13g06840.N7	j	PAC:26317660	TSS49786	No	NO Cluster	AT5G15790	'29.5.11.4.2'	'protein.degradation.ubiquitin.E3.RING'	'moderately similar to ( 254)AT5G15790| Symbols: | zinc finger (C3HC4-type RING finger) family protein | chr5:5149803-5150967 FORWARD no original description'
Glyma13g06840.N9	j	PAC:26317660	TSS49787	No	NO Cluster	AT5G15790	'29.5.11.4.2'	'protein.degradation.ubiquitin.E3.RING'	'moderately similar to ( 254)AT5G15790| Symbols: | zinc finger (C3HC4-type RING finger) family protein | chr5:5149803-5150967 FORWARD no original description'
Glyma13g06840.N10	j	PAC:26317660	TSS49787	No	NO Cluster	AT5G15790	'29.5.11.4.2'	'protein.degradation.ubiquitin.E3.RING'	'moderately similar to ( 254)AT5G15790| Symbols: | zinc finger (C3HC4-type RING finger) family protein | chr5:5149803-5150967 FORWARD no original description'
Glyma13g06840.N4	j	PAC:26317660	TSS49786	No	NO Cluster	AT5G15790	'29.5.11.4.2'	'protein.degradation.ubiquitin.E3.RING'	'moderately similar to ( 254)AT5G15790| Symbols: | zinc finger (C3HC4-type RING finger) family protein | chr5:5149803-5150967 FORWARD no original description'
Glyma13g06840.N11	j	PAC:26317660	TSS49787	No	NO Cluster	AT5G15790	'29.5.11.4.2'	'protein.degradation.ubiquitin.E3.RING'	'moderately similar to ( 254)AT5G15790| Symbols: | zinc finger (C3HC4-type RING finger) family protein | chr5:5149803-5150967 FORWARD no original description'
Glyma13g06840.3	=	PAC:26317660	TSS49788	Yes	105	AT5G15790	'29.5.11.4.2'	'protein.degradation.ubiquitin.E3.RING'	'moderately similar to ( 254)AT5G15790| Symbols: | zinc finger (C3HC4-type RING finger) family protein | chr5:5149803-5150967 FORWARD no original description'
Glyma17g16570.1	=	PAC:26313091	TSS63044	Yes	45	AT4G35470	'30.2.11'	'signalling.receptor kinases.leucine rich repeat XI'	'moderately similar to ( 405)AT4G35470| Symbols: | leucine-rich repeat family protein | chr4:16846536-16848453 FORWARDvery weakly similar to (82.4)RPK1_IPONI no original description'
Glyma17g16570.N3	j	PAC:26313091	TSS63044	No	NO Cluster	AT4G35470	'30.2.11'	'signalling.receptor kinases.leucine rich repeat XI'	'moderately similar to ( 405)AT4G35470| Symbols: | leucine-rich repeat family protein | chr4:16846536-16848453 FORWARDvery weakly similar to (82.4)RPK1_IPONI no original description'
Glyma17g16570.N2	j	PAC:26313091	TSS63044	No	NO Cluster	AT4G35470	'30.2.11'	'signalling.receptor kinases.leucine rich repeat XI'	'moderately similar to ( 405)AT4G35470| Symbols: | leucine-rich repeat family protein | chr4:16846536-16848453 FORWARDvery weakly similar to (82.4)RPK1_IPONI no original description'
Glyma05g05710.1	=	PAC:26319594	TSS16841	Yes	35	AT2G35190	'31.4'	'cell.vesicle transport'	'weakly similar to ( 163)AT2G35190| Symbols: ATNPSN11, NSPN11, NPSN11 | NPSN11 (NOVEL PLANT SNARE 11); protein transporter | chr2:14838166-14840058 FORWARD no original description'
Glyma05g05710.N2	j	PAC:26319594	TSS16841	No	NO Cluster	AT2G35190	'31.4'	'cell.vesicle transport'	'weakly similar to ( 163)AT2G35190| Symbols: ATNPSN11, NSPN11, NPSN11 | NPSN11 (NOVEL PLANT SNARE 11); protein transporter | chr2:14838166-14840058 FORWARD no original description'
Glyma18g05620.N3	j	PAC:26355291	TSS65949	No	NO Cluster	AT5G58250	'35.2'	'not assigned.unknown'	'weakly similar to ( 189)AT5G58250| Symbols: | similar to hypothetical protein [Vitis vinifera] (GB:CAN75840.1); contains domain PD020337 (PD020337) | chr5:23576784-23577598 FORWARD no original description'
Glyma18g05620.2	=	PAC:26355292	TSS65949	No	NO Cluster	AT5G58250	'35.2'	'not assigned.unknown'	'weakly similar to ( 189)AT5G58250| Symbols: | similar to hypothetical protein [Vitis vinifera] (GB:CAN75840.1); contains domain PD020337 (PD020337) | chr5:23576784-23577598 FORWARD no original description'
Glyma18g05620.2	=	PAC:26355292	TSS65949	No	NO Cluster	AT5G58250	'35.2'	'not assigned.unknown'	'weakly similar to ( 189)AT5G58250| Symbols: | similar to hypothetical protein [Vitis vinifera] (GB:CAN75840.1); contains domain PD020337 (PD020337) | chr5:23576784-23577598 FORWARD no original description'
Glyma18g05620.1	=	PAC:26355291	TSS65949	Yes	10	AT5G58250	'35.2'	'not assigned.unknown'	'weakly similar to ( 189)AT5G58250| Symbols: | similar to hypothetical protein [Vitis vinifera] (GB:CAN75840.1); contains domain PD020337 (PD020337) | chr5:23576784-23577598 FORWARD no original description'
Glyma18g05620.N6	j	PAC:26355291	TSS65949	No	NO Cluster	AT5G58250	'35.2'	'not assigned.unknown'	'weakly similar to ( 189)AT5G58250| Symbols: | similar to hypothetical protein [Vitis vinifera] (GB:CAN75840.1); contains domain PD020337 (PD020337) | chr5:23576784-23577598 FORWARD no original description'
Glyma18g05620.N4	j	PAC:26355291	TSS65949	No	NO Cluster	AT5G58250	'35.2'	'not assigned.unknown'	'weakly similar to ( 189)AT5G58250| Symbols: | similar to hypothetical protein [Vitis vinifera] (GB:CAN75840.1); contains domain PD020337 (PD020337) | chr5:23576784-23577598 FORWARD no original description'
Glyma18g05620.N5	j	PAC:26355291	TSS65949	No	NO Cluster	AT5G58250	'35.2'	'not assigned.unknown'	'weakly similar to ( 189)AT5G58250| Symbols: | similar to hypothetical protein [Vitis vinifera] (GB:CAN75840.1); contains domain PD020337 (PD020337) | chr5:23576784-23577598 FORWARD no original description'
Glyma02g00320.1	=	PAC:26287758	TSS3311	Yes	16	AT5G17560	'27.3'	'RNA.regulation of transcription'	'weakly similar to ( 132)AT5G17560| Symbols: | BolA-like family protein | chr5:5788476-5789673 FORWARD no original description'
Glyma02g00320.2	=	PAC:26287759	TSS3311	No	NO Cluster	AT5G17560	'27.3'	'RNA.regulation of transcription'	'weakly similar to ( 132)AT5G17560| Symbols: | BolA-like family protein | chr5:5788476-5789673 FORWARD no original description'
Glyma02g00320.N3	j	PAC:26287758	TSS3311	No	NO Cluster	AT5G17560	'27.3'	'RNA.regulation of transcription'	'weakly similar to ( 132)AT5G17560| Symbols: | BolA-like family protein | chr5:5788476-5789673 FORWARD no original description'
Glyma06g18551.N2	j	PAC:26300932	TSS19563	No	NO Cluster	NO MapMan Annotation
Glyma06g18551.1	=	PAC:26300932	TSS19563	Yes	110	NO MapMan Annotation
Glyma06g18551.N3	j	PAC:26300932	TSS19563	No	NO Cluster	NO MapMan Annotation
Glyma02g10910.N3	j	PAC:26290360	TSS3989	No	NO Cluster	AT1G13310	'35.2'	'not assigned.unknown'	'moderately similar to ( 254)AT1G13310| Symbols: | similar to unnamed protein product [Vitis vinifera] (GB:CAO42102.1); contains InterPro domain BRO1 (InterPro:IPR004328) | chr1:4561214-4562926 REVERSE no original description'
Glyma02g10910.N2	j	PAC:26290360	TSS3988	No	NO Cluster	AT1G13310	'35.2'	'not assigned.unknown'	'moderately similar to ( 254)AT1G13310| Symbols: | similar to unnamed protein product [Vitis vinifera] (GB:CAO42102.1); contains InterPro domain BRO1 (InterPro:IPR004328) | chr1:4561214-4562926 REVERSE no original description'
Glyma02g10910.1	=	PAC:26290360	TSS3988	Yes	46	AT1G13310	'35.2'	'not assigned.unknown'	'moderately similar to ( 254)AT1G13310| Symbols: | similar to unnamed protein product [Vitis vinifera] (GB:CAO42102.1); contains InterPro domain BRO1 (InterPro:IPR004328) | chr1:4561214-4562926 REVERSE no original description'
Glyma02g45640.N2	o	PAC:26288795	TSS5229	No	NO Cluster	No Arabidopsis Homolohue	'35.2'	'not assigned.unknown'	'no original description'
Glyma02g45640.1	=	PAC:26288795	TSS5230	Yes	36	No Arabidopsis Homolohue	'35.2'	'not assigned.unknown'	'no original description'
Glyma02g45640.N3	o	PAC:26288795	TSS5230	No	NO Cluster	No Arabidopsis Homolohue	'35.2'	'not assigned.unknown'	'no original description'
Glyma04g33033.N3	j	PAC:26303859	TSS14078	No	NO Cluster	NO MapMan Annotation
Glyma04g33033.N4	j	PAC:26303859	TSS14078	No	NO Cluster	NO MapMan Annotation
Glyma04g33033.N2	j	PAC:26303859	TSS14077	Yes	45	NO MapMan Annotation
Glyma04g33033.1	=	PAC:26303859	TSS14079	No	NO Cluster	NO MapMan Annotation
Glyma04g33033.N9	j	PAC:26303859	TSS14079	No	NO Cluster	NO MapMan Annotation
Glyma04g33033.N10	j	PAC:26303859	TSS14079	No	NO Cluster	NO MapMan Annotation
Glyma04g33033.N11	j	PAC:26303859	TSS14079	No	NO Cluster	NO MapMan Annotation
Glyma04g33033.N5	j	PAC:26303859	TSS14079	No	NO Cluster	NO MapMan Annotation
Glyma04g33033.N6	j	PAC:26303859	TSS14079	No	NO Cluster	NO MapMan Annotation
Glyma04g33033.N7	j	PAC:26303859	TSS14079	No	NO Cluster	NO MapMan Annotation
Glyma04g33033.N8	j	PAC:26303859	TSS14079	No	NO Cluster	NO MapMan Annotation
Glyma06g14420.N4	j	PAC:26301900	TSS19300	No	NO Cluster	AT5G24650	'29.3.2'	'protein.targeting.mitochondria'	'moderately similar to ( 250)AT5G24650| Symbols: | mitochondrial import inner membrane translocase subunit Tim17/Tim22/Tim23 family protein | chr5:8437126-8438862 FORWARD no original description'
Glyma06g14420.N3	j	PAC:26301900	TSS19300	No	NO Cluster	AT5G24650	'29.3.2'	'protein.targeting.mitochondria'	'moderately similar to ( 250)AT5G24650| Symbols: | mitochondrial import inner membrane translocase subunit Tim17/Tim22/Tim23 family protein | chr5:8437126-8438862 FORWARD no original description'
Glyma06g14420.2	=	PAC:26301901	TSS19300	No	NO Cluster	AT5G24650	'29.3.2'	'protein.targeting.mitochondria'	'moderately similar to ( 250)AT5G24650| Symbols: | mitochondrial import inner membrane translocase subunit Tim17/Tim22/Tim23 family protein | chr5:8437126-8438862 FORWARD no original description'
Glyma06g14420.1	=	PAC:26301900	TSS19300	Yes	59	AT5G24650	'29.3.2'	'protein.targeting.mitochondria'	'moderately similar to ( 250)AT5G24650| Symbols: | mitochondrial import inner membrane translocase subunit Tim17/Tim22/Tim23 family protein | chr5:8437126-8438862 FORWARD no original description'
Glyma18g03480.N7	j	PAC:26357301	TSS67815	No	NO Cluster	AT5G58030	'34.99'	'transport.misc'	'moderately similar to ( 363)AT5G58030| Symbols: | transport protein particle (TRAPP) component Bet3 family protein | chr5:23504247-23505709 REVERSE no original description'
Glyma18g03480.N5	j	PAC:26357301	TSS67815	No	NO Cluster	AT5G58030	'34.99'	'transport.misc'	'moderately similar to ( 363)AT5G58030| Symbols: | transport protein particle (TRAPP) component Bet3 family protein | chr5:23504247-23505709 REVERSE no original description'
Glyma18g03480.N4	j	PAC:26357301	TSS67815	No	NO Cluster	AT5G58030	'34.99'	'transport.misc'	'moderately similar to ( 363)AT5G58030| Symbols: | transport protein particle (TRAPP) component Bet3 family protein | chr5:23504247-23505709 REVERSE no original description'
Glyma18g03480.2	=	PAC:26357301	TSS67815	Yes	33	AT5G58030	'34.99'	'transport.misc'	'moderately similar to ( 363)AT5G58030| Symbols: | transport protein particle (TRAPP) component Bet3 family protein | chr5:23504247-23505709 REVERSE no original description'
Glyma18g03480.N6	j	PAC:26357301	TSS67815	No	NO Cluster	AT5G58030	'34.99'	'transport.misc'	'moderately similar to ( 363)AT5G58030| Symbols: | transport protein particle (TRAPP) component Bet3 family protein | chr5:23504247-23505709 REVERSE no original description'
Glyma18g03480.N3	j	PAC:26357301	TSS67815	No	NO Cluster	AT5G58030	'34.99'	'transport.misc'	'moderately similar to ( 363)AT5G58030| Symbols: | transport protein particle (TRAPP) component Bet3 family protein | chr5:23504247-23505709 REVERSE no original description'
Glyma08g19510.1	=	PAC:26307105	TSS27882	No	NO Cluster	No Arabidopsis Homolohue	'35.2'	'not assigned.unknown'	'no original description'
Glyma08g19510.N2	j	PAC:26307105	TSS27881	Yes	111	No Arabidopsis Homolohue	'35.2'	'not assigned.unknown'	'no original description'
Glyma08g19510.N3	s	PAC:26307105	TSS30470	No	NO Cluster	No Arabidopsis Homolohue	'35.2'	'not assigned.unknown'	'no original description'
Glyma05g01360.N5	j	PAC:26322293	TSS16588	No	NO Cluster	AT5G62740	'35.2'	'not assigned.unknown'	'moderately similar to ( 452)AT5G62740| Symbols: | band 7 family protein | chr5:25218546-25219761 FORWARD no original description'
Glyma05g01360.3	=	PAC:26322291	TSS16588	No	NO Cluster	AT5G62740	'35.2'	'not assigned.unknown'	'moderately similar to ( 452)AT5G62740| Symbols: | band 7 family protein | chr5:25218546-25219761 FORWARD no original description'
Glyma05g01360.1	=	PAC:26322292	TSS16589	Yes	21	AT5G62740	'35.2'	'not assigned.unknown'	'moderately similar to ( 452)AT5G62740| Symbols: | band 7 family protein | chr5:25218546-25219761 FORWARD no original description'
Glyma05g01360.N4	j	PAC:26322293	TSS16588	No	NO Cluster	AT5G62740	'35.2'	'not assigned.unknown'	'moderately similar to ( 452)AT5G62740| Symbols: | band 7 family protein | chr5:25218546-25219761 FORWARD no original description'
Glyma05g01360.2	=	PAC:26322293	TSS16590	No	NO Cluster	AT5G62740	'35.2'	'not assigned.unknown'	'moderately similar to ( 452)AT5G62740| Symbols: | band 7 family protein | chr5:25218546-25219761 FORWARD no original description'
Glyma15g05930.N6	j	PAC:26332772	TSS55497	No	NO Cluster	AT5G09430	'35.2'	'not assigned.unknown'	'moderately similar to ( 449)AT5G09430| Symbols: | hydrolase | chr5:2932163-2933363 FORWARD no original description'
Glyma15g05930.N5	j	PAC:26332772	TSS55497	No	NO Cluster	AT5G09430	'35.2'	'not assigned.unknown'	'moderately similar to ( 449)AT5G09430| Symbols: | hydrolase | chr5:2932163-2933363 FORWARD no original description'
Glyma15g05930.N4	j	PAC:26332772	TSS55497	No	NO Cluster	AT5G09430	'35.2'	'not assigned.unknown'	'moderately similar to ( 449)AT5G09430| Symbols: | hydrolase | chr5:2932163-2933363 FORWARD no original description'
Glyma15g05930.N3	j	PAC:26332772	TSS55497	No	NO Cluster	AT5G09430	'35.2'	'not assigned.unknown'	'moderately similar to ( 449)AT5G09430| Symbols: | hydrolase | chr5:2932163-2933363 FORWARD no original description'
Glyma15g05930.2	=	PAC:26332772	TSS55498	Yes	114	AT5G09430	'35.2'	'not assigned.unknown'	'moderately similar to ( 449)AT5G09430| Symbols: | hydrolase | chr5:2932163-2933363 FORWARD no original description'
Glyma15g05930.N7	j	PAC:26332772	TSS55497	No	NO Cluster	AT5G09430	'35.2'	'not assigned.unknown'	'moderately similar to ( 449)AT5G09430| Symbols: | hydrolase | chr5:2932163-2933363 FORWARD no original description'
Glyma03g05300.1	=	PAC:26333326	TSS7873	No	NO Cluster	No Arabidopsis Homolohue	'35.2'	'not assigned.unknown'	'no original description'
Glyma03g05300.N6	j	PAC:26333326	TSS7872	No	NO Cluster	No Arabidopsis Homolohue	'35.2'	'not assigned.unknown'	'no original description'
Glyma03g05300.N5	j	PAC:26333326	TSS7872	No	NO Cluster	No Arabidopsis Homolohue	'35.2'	'not assigned.unknown'	'no original description'
Glyma03g05300.N3	j	PAC:26333326	TSS7872	No	NO Cluster	No Arabidopsis Homolohue	'35.2'	'not assigned.unknown'	'no original description'
Glyma03g05300.N2	j	PAC:26333326	TSS7872	No	NO Cluster	No Arabidopsis Homolohue	'35.2'	'not assigned.unknown'	'no original description'
Glyma03g05300.N4	j	PAC:26333326	TSS7872	No	NO Cluster	No Arabidopsis Homolohue	'35.2'	'not assigned.unknown'	'no original description'
Glyma03g05300.N8	x	PAC:26333326	TSS9705	No	NO Cluster	No Arabidopsis Homolohue	'35.2'	'not assigned.unknown'	'no original description'
Glyma03g05300.N7	x	PAC:26333326	TSS9704	Yes	40	No Arabidopsis Homolohue	'35.2'	'not assigned.unknown'	'no original description'
Glyma10g36600.N17	j	PAC:26344186	TSS37224	No	NO Cluster	AT1G22770	'33.99'	'development.unspecified'	'nearly identical (1610)AT1G22770| Symbols: FB, GI | GI (GIGANTEA); binding | chr1:8062387-8067436 FORWARDnearly identical (1488)GIGAN_ORYSA no original description'
Glyma10g36600.3	=	PAC:26344186	TSS37223	No	NO Cluster	AT1G22770	'33.99'	'development.unspecified'	'nearly identical (1610)AT1G22770| Symbols: FB, GI | GI (GIGANTEA); binding | chr1:8062387-8067436 FORWARDnearly identical (1488)GIGAN_ORYSA no original description'
Glyma10g36600.N16	j	PAC:26344186	TSS37223	No	NO Cluster	AT1G22770	'33.99'	'development.unspecified'	'nearly identical (1610)AT1G22770| Symbols: FB, GI | GI (GIGANTEA); binding | chr1:8062387-8067436 FORWARDnearly identical (1488)GIGAN_ORYSA no original description'
Glyma10g36600.N15	j	PAC:26344186	TSS37223	No	NO Cluster	AT1G22770	'33.99'	'development.unspecified'	'nearly identical (1610)AT1G22770| Symbols: FB, GI | GI (GIGANTEA); binding | chr1:8062387-8067436 FORWARDnearly identical (1488)GIGAN_ORYSA no original description'
Glyma10g36600.N14	j	PAC:26344186	TSS37223	No	NO Cluster	AT1G22770	'33.99'	'development.unspecified'	'nearly identical (1610)AT1G22770| Symbols: FB, GI | GI (GIGANTEA); binding | chr1:8062387-8067436 FORWARDnearly identical (1488)GIGAN_ORYSA no original description'
Glyma10g36600.N11	j	PAC:26344186	TSS37223	No	NO Cluster	AT1G22770	'33.99'	'development.unspecified'	'nearly identical (1610)AT1G22770| Symbols: FB, GI | GI (GIGANTEA); binding | chr1:8062387-8067436 FORWARDnearly identical (1488)GIGAN_ORYSA no original description'
Glyma10g36600.N12	j	PAC:26344186	TSS37223	Yes	68	AT1G22770	'33.99'	'development.unspecified'	'nearly identical (1610)AT1G22770| Symbols: FB, GI | GI (GIGANTEA); binding | chr1:8062387-8067436 FORWARDnearly identical (1488)GIGAN_ORYSA no original description'
Glyma10g36600.N13	j	PAC:26344186	TSS37223	No	NO Cluster	AT1G22770	'33.99'	'development.unspecified'	'nearly identical (1610)AT1G22770| Symbols: FB, GI | GI (GIGANTEA); binding | chr1:8062387-8067436 FORWARDnearly identical (1488)GIGAN_ORYSA no original description'
Glyma10g36600.N10	j	PAC:26344186	TSS37223	No	NO Cluster	AT1G22770	'33.99'	'development.unspecified'	'nearly identical (1610)AT1G22770| Symbols: FB, GI | GI (GIGANTEA); binding | chr1:8062387-8067436 FORWARDnearly identical (1488)GIGAN_ORYSA no original description'
Glyma10g36600.N8	j	PAC:26344186	TSS37223	No	NO Cluster	AT1G22770	'33.99'	'development.unspecified'	'nearly identical (1610)AT1G22770| Symbols: FB, GI | GI (GIGANTEA); binding | chr1:8062387-8067436 FORWARDnearly identical (1488)GIGAN_ORYSA no original description'
Glyma10g36600.N9	j	PAC:26344186	TSS37223	No	NO Cluster	AT1G22770	'33.99'	'development.unspecified'	'nearly identical (1610)AT1G22770| Symbols: FB, GI | GI (GIGANTEA); binding | chr1:8062387-8067436 FORWARDnearly identical (1488)GIGAN_ORYSA no original description'
Glyma10g36600.N6	j	PAC:26344186	TSS37223	No	NO Cluster	AT1G22770	'33.99'	'development.unspecified'	'nearly identical (1610)AT1G22770| Symbols: FB, GI | GI (GIGANTEA); binding | chr1:8062387-8067436 FORWARDnearly identical (1488)GIGAN_ORYSA no original description'
Glyma10g36600.N7	j	PAC:26344186	TSS37223	No	NO Cluster	AT1G22770	'33.99'	'development.unspecified'	'nearly identical (1610)AT1G22770| Symbols: FB, GI | GI (GIGANTEA); binding | chr1:8062387-8067436 FORWARDnearly identical (1488)GIGAN_ORYSA no original description'
Glyma10g36600.N4	j	PAC:26344186	TSS37223	No	NO Cluster	AT1G22770	'33.99'	'development.unspecified'	'nearly identical (1610)AT1G22770| Symbols: FB, GI | GI (GIGANTEA); binding | chr1:8062387-8067436 FORWARDnearly identical (1488)GIGAN_ORYSA no original description'
Glyma10g36600.N5	j	PAC:26344186	TSS37223	No	NO Cluster	AT1G22770	'33.99'	'development.unspecified'	'nearly identical (1610)AT1G22770| Symbols: FB, GI | GI (GIGANTEA); binding | chr1:8062387-8067436 FORWARDnearly identical (1488)GIGAN_ORYSA no original description'
Glyma09g29480.1	=	PAC:26341561	TSS34753	Yes	63	AT5G23130	'35.2'	'not assigned.unknown'	'weakly similar to ( 187)AT5G23130| Symbols: | peptidoglycan-binding LysM domain-containing protein | chr5:7781478-7783336 FORWARD no original description'
Glyma09g29480.N2	j	PAC:26341561	TSS34753	No	NO Cluster	AT5G23130	'35.2'	'not assigned.unknown'	'weakly similar to ( 187)AT5G23130| Symbols: | peptidoglycan-binding LysM domain-containing protein | chr5:7781478-7783336 FORWARD no original description'
Glyma01g36654.1	=	PAC:26325767	TSS2652	No	NO Cluster	NO MapMan Annotation
Glyma01g36654.N5	j	PAC:26325768	TSS2653	Yes	29	NO MapMan Annotation
Glyma01g36654.2	=	PAC:26325768	TSS2651	No	NO Cluster	NO MapMan Annotation
Glyma01g36654.N3	j	PAC:26325768	TSS2651	No	NO Cluster	NO MapMan Annotation
Glyma10g28180.1	=	PAC:26347210	TSS36647	Yes	20	AT5G26710	'29.1.17'	'protein.aa activation.glutamate-tRNA ligase'	'nearly identical (1141)AT5G26710| Symbols: | glutamate-tRNA ligase, putative / glutamyl-tRNA synthetase, putatuve / GluRS, putative | chr5:9305676-9308250 FORWARDmoderately similar to ( 249)SYQ_LUPLU no original description'
Glyma10g28180.N3	j	PAC:26347210	TSS36648	No	NO Cluster	AT5G26710	'29.1.17'	'protein.aa activation.glutamate-tRNA ligase'	'nearly identical (1141)AT5G26710| Symbols: | glutamate-tRNA ligase, putative / glutamyl-tRNA synthetase, putatuve / GluRS, putative | chr5:9305676-9308250 FORWARDmoderately similar to ( 249)SYQ_LUPLU no original description'
Glyma10g28180.N2	j	PAC:26347210	TSS36647	No	NO Cluster	AT5G26710	'29.1.17'	'protein.aa activation.glutamate-tRNA ligase'	'nearly identical (1141)AT5G26710| Symbols: | glutamate-tRNA ligase, putative / glutamyl-tRNA synthetase, putatuve / GluRS, putative | chr5:9305676-9308250 FORWARDmoderately similar to ( 249)SYQ_LUPLU no original description'
Glyma10g28180.N4	j	PAC:26347210	TSS36649	No	NO Cluster	AT5G26710	'29.1.17'	'protein.aa activation.glutamate-tRNA ligase'	'nearly identical (1141)AT5G26710| Symbols: | glutamate-tRNA ligase, putative / glutamyl-tRNA synthetase, putatuve / GluRS, putative | chr5:9305676-9308250 FORWARDmoderately similar to ( 249)SYQ_LUPLU no original description'
Glyma10g28180.N5	j	PAC:26347210	TSS36650	No	NO Cluster	AT5G26710	'29.1.17'	'protein.aa activation.glutamate-tRNA ligase'	'nearly identical (1141)AT5G26710| Symbols: | glutamate-tRNA ligase, putative / glutamyl-tRNA synthetase, putatuve / GluRS, putative | chr5:9305676-9308250 FORWARDmoderately similar to ( 249)SYQ_LUPLU no original description'
Glyma10g28180.N6	j	PAC:26347210	TSS36650	No	NO Cluster	AT5G26710	'29.1.17'	'protein.aa activation.glutamate-tRNA ligase'	'nearly identical (1141)AT5G26710| Symbols: | glutamate-tRNA ligase, putative / glutamyl-tRNA synthetase, putatuve / GluRS, putative | chr5:9305676-9308250 FORWARDmoderately similar to ( 249)SYQ_LUPLU no original description'
Glyma16g29870.N3	o	PAC:26352212	TSS61593	No	NO Cluster	AT5G24010	'29.4.1.57'	'protein.postranslational modification.kinase.receptor like cytoplasmatic kinase VII'	'highly similar to ( 504)AT5G24010| Symbols: | protein kinase family protein | chr5:8113913-8116387 FORWARDmoderately similar to ( 238)NORK_MEDTR no original description'
Glyma16g29870.2	=	PAC:26352212	TSS61593	Yes	21	AT5G24010	'29.4.1.57'	'protein.postranslational modification.kinase.receptor like cytoplasmatic kinase VII'	'highly similar to ( 504)AT5G24010| Symbols: | protein kinase family protein | chr5:8113913-8116387 FORWARDmoderately similar to ( 238)NORK_MEDTR no original description'
Glyma15g39820.3	=	PAC:26329598	TSS58605	Yes	9	AT1G17140	'35.2'	'not assigned.unknown'	'weakly similar to ( 185)AT1G17140| Symbols: | tropomyosin-related | chr1:5856733-5857854 REVERSE no original description'
Glyma15g39820.1	=	PAC:26329599	TSS58604	No	NO Cluster	AT1G17140	'35.2'	'not assigned.unknown'	'weakly similar to ( 185)AT1G17140| Symbols: | tropomyosin-related | chr1:5856733-5857854 REVERSE no original description'
Glyma15g39820.N8	j	PAC:26329600	TSS58603	No	NO Cluster	AT1G17140	'35.2'	'not assigned.unknown'	'weakly similar to ( 185)AT1G17140| Symbols: | tropomyosin-related | chr1:5856733-5857854 REVERSE no original description'
Glyma15g39820.N10	j	PAC:26329600	TSS58606	No	NO Cluster	AT1G17140	'35.2'	'not assigned.unknown'	'weakly similar to ( 185)AT1G17140| Symbols: | tropomyosin-related | chr1:5856733-5857854 REVERSE no original description'
Glyma15g39820.5	=	PAC:26329601	TSS58605	No	NO Cluster	AT1G17140	'35.2'	'not assigned.unknown'	'weakly similar to ( 185)AT1G17140| Symbols: | tropomyosin-related | chr1:5856733-5857854 REVERSE no original description'
Glyma15g39820.4	=	PAC:26329600	TSS58606	No	NO Cluster	AT1G17140	'35.2'	'not assigned.unknown'	'weakly similar to ( 185)AT1G17140| Symbols: | tropomyosin-related | chr1:5856733-5857854 REVERSE no original description'
Glyma15g39820.N11	j	PAC:26329600	TSS58606	No	NO Cluster	AT1G17140	'35.2'	'not assigned.unknown'	'weakly similar to ( 185)AT1G17140| Symbols: | tropomyosin-related | chr1:5856733-5857854 REVERSE no original description'
Glyma15g39820.N7	j	PAC:26329600	TSS58603	No	NO Cluster	AT1G17140	'35.2'	'not assigned.unknown'	'weakly similar to ( 185)AT1G17140| Symbols: | tropomyosin-related | chr1:5856733-5857854 REVERSE no original description'
Glyma15g39820.N6	j	PAC:26329600	TSS58602	No	NO Cluster	AT1G17140	'35.2'	'not assigned.unknown'	'weakly similar to ( 185)AT1G17140| Symbols: | tropomyosin-related | chr1:5856733-5857854 REVERSE no original description'
Glyma15g39820.N9	j	PAC:26329600	TSS58604	No	NO Cluster	AT1G17140	'35.2'	'not assigned.unknown'	'weakly similar to ( 185)AT1G17140| Symbols: | tropomyosin-related | chr1:5856733-5857854 REVERSE no original description'
Glyma20g05530.N2	j	PAC:26339029	TSS73596	No	NO Cluster	AT1G76490	'16.1.2.3'	'secondary metabolism.isoprenoids.mevalonate pathway.HMG-CoA reductase'	'highly similar to ( 720)AT1G76490| Symbols: HMGR1, HMG1 | HMG1 (3-HYDROXY-3-METHYLGLUTARYL COA REDUCTASE) | chr1:28700695-28703100 FORWARDhighly similar to ( 748)HMDH1_HEVBR no original description'
Glyma20g05530.N3	j	PAC:26339029	TSS73596	No	NO Cluster	AT1G76490	'16.1.2.3'	'secondary metabolism.isoprenoids.mevalonate pathway.HMG-CoA reductase'	'highly similar to ( 720)AT1G76490| Symbols: HMGR1, HMG1 | HMG1 (3-HYDROXY-3-METHYLGLUTARYL COA REDUCTASE) | chr1:28700695-28703100 FORWARDhighly similar to ( 748)HMDH1_HEVBR no original description'
Glyma20g05530.1	=	PAC:26339029	TSS73596	Yes	41	AT1G76490	'16.1.2.3'	'secondary metabolism.isoprenoids.mevalonate pathway.HMG-CoA reductase'	'highly similar to ( 720)AT1G76490| Symbols: HMGR1, HMG1 | HMG1 (3-HYDROXY-3-METHYLGLUTARYL COA REDUCTASE) | chr1:28700695-28703100 FORWARDhighly similar to ( 748)HMDH1_HEVBR no original description'
Glyma13g27710.N2	j	PAC:26317213	TSS50805	No	NO Cluster	AT3G06050	'21.5'	'redox.peroxiredoxin'	'moderately similar to ( 276)AT3G06050| Symbols: PRXIIF, ATPRXIIF | ATPRXIIF/PRXIIF (PEROXIREDOXIN IIF); antioxidant/ peroxidase | chr3:1826317-1827815 REVERSE no original description'
Glyma13g27710.N3	j	PAC:26317213	TSS50805	No	NO Cluster	AT3G06050	'21.5'	'redox.peroxiredoxin'	'moderately similar to ( 276)AT3G06050| Symbols: PRXIIF, ATPRXIIF | ATPRXIIF/PRXIIF (PEROXIREDOXIN IIF); antioxidant/ peroxidase | chr3:1826317-1827815 REVERSE no original description'
Glyma13g27710.1	=	PAC:26317213	TSS50805	Yes	65	AT3G06050	'21.5'	'redox.peroxiredoxin'	'moderately similar to ( 276)AT3G06050| Symbols: PRXIIF, ATPRXIIF | ATPRXIIF/PRXIIF (PEROXIREDOXIN IIF); antioxidant/ peroxidase | chr3:1826317-1827815 REVERSE no original description'
Glyma02g41340.1	=	PAC:26287615	TSS7044	Yes	80	AT5G37790	'29.4.1.57'	'protein.postranslational modification.kinase.receptor like cytoplasmatic kinase VII'	'highly similar to ( 598)AT5G37790| Symbols: | protein kinase family protein | chr5:15025663-15028255 REVERSEweakly similar to ( 182)NORK_MEDTR no original description'
Glyma02g41340.N3	j	PAC:26287616	TSS7044	No	NO Cluster	AT5G37790	'29.4.1.57'	'protein.postranslational modification.kinase.receptor like cytoplasmatic kinase VII'	'highly similar to ( 598)AT5G37790| Symbols: | protein kinase family protein | chr5:15025663-15028255 REVERSEweakly similar to ( 182)NORK_MEDTR no original description'
Glyma02g41340.2	=	PAC:26287616	TSS7044	No	NO Cluster	AT5G37790	'29.4.1.57'	'protein.postranslational modification.kinase.receptor like cytoplasmatic kinase VII'	'highly similar to ( 598)AT5G37790| Symbols: | protein kinase family protein | chr5:15025663-15028255 REVERSEweakly similar to ( 182)NORK_MEDTR no original description'
Glyma20g24110.1	=	PAC:26336957	TSS74064	Yes	113	AT1G34360	'27.3.67'	'RNA.regulation of transcription.putative transcription regulator'	'weakly similar to ( 138)AT1G34360| Symbols: | translation initiation factor 3 (IF-3) family protein | chr1:12542964-12546003 FORWARD no original description'
Glyma20g24110.N3	j	PAC:26336957	TSS74064	No	NO Cluster	AT1G34360	'27.3.67'	'RNA.regulation of transcription.putative transcription regulator'	'weakly similar to ( 138)AT1G34360| Symbols: | translation initiation factor 3 (IF-3) family protein | chr1:12542964-12546003 FORWARD no original description'
Glyma20g24110.N2	j	PAC:26336957	TSS74064	No	NO Cluster	AT1G34360	'27.3.67'	'RNA.regulation of transcription.putative transcription regulator'	'weakly similar to ( 138)AT1G34360| Symbols: | translation initiation factor 3 (IF-3) family protein | chr1:12542964-12546003 FORWARD no original description'
Glyma12g34110.N9	j	PAC:26293071	TSS45052	No	NO Cluster	AT5G54780	'30.5'	'signalling.G-proteins'	'highly similar to ( 647)AT5G54780| Symbols: | RAB GTPase activator | chr5:22265922-22268918 REVERSE no original description'
Glyma12g34110.N8	j	PAC:26293071	TSS45052	No	NO Cluster	AT5G54780	'30.5'	'signalling.G-proteins'	'highly similar to ( 647)AT5G54780| Symbols: | RAB GTPase activator | chr5:22265922-22268918 REVERSE no original description'
Glyma12g34110.N7	j	PAC:26293071	TSS45052	No	NO Cluster	AT5G54780	'30.5'	'signalling.G-proteins'	'highly similar to ( 647)AT5G54780| Symbols: | RAB GTPase activator | chr5:22265922-22268918 REVERSE no original description'
Glyma12g34110.N5	j	PAC:26293071	TSS45052	No	NO Cluster	AT5G54780	'30.5'	'signalling.G-proteins'	'highly similar to ( 647)AT5G54780| Symbols: | RAB GTPase activator | chr5:22265922-22268918 REVERSE no original description'
Glyma12g34110.N6	j	PAC:26293071	TSS45052	No	NO Cluster	AT5G54780	'30.5'	'signalling.G-proteins'	'highly similar to ( 647)AT5G54780| Symbols: | RAB GTPase activator | chr5:22265922-22268918 REVERSE no original description'
Glyma12g34110.N2	j	PAC:26293071	TSS45052	No	NO Cluster	AT5G54780	'30.5'	'signalling.G-proteins'	'highly similar to ( 647)AT5G54780| Symbols: | RAB GTPase activator | chr5:22265922-22268918 REVERSE no original description'
Glyma12g34110.N3	j	PAC:26293071	TSS45052	No	NO Cluster	AT5G54780	'30.5'	'signalling.G-proteins'	'highly similar to ( 647)AT5G54780| Symbols: | RAB GTPase activator | chr5:22265922-22268918 REVERSE no original description'
Glyma12g34110.1	=	PAC:26293071	TSS45052	Yes	24	AT5G54780	'30.5'	'signalling.G-proteins'	'highly similar to ( 647)AT5G54780| Symbols: | RAB GTPase activator | chr5:22265922-22268918 REVERSE no original description'
Glyma12g34110.N4	j	PAC:26293071	TSS45052	No	NO Cluster	AT5G54780	'30.5'	'signalling.G-proteins'	'highly similar to ( 647)AT5G54780| Symbols: | RAB GTPase activator | chr5:22265922-22268918 REVERSE no original description'
Glyma07g14850.2	=	PAC:26349305	TSS25517	Yes	35	AT1G61670	'35.2'	'not assigned.unknown'	'highly similar to ( 603)AT1G61670| Symbols: | similar to unknown protein [Arabidopsis thaliana] (TAIR:AT1G10980.1); similar to hypothetical protein [Vitis vinifera] (GB:CAN66485.1); similar to unnamed protein product [Vitis vinifera] (GB:CAO41520.1); similar to unnamed protein product [Vitis vinifera] (GB:CAO48876.1); contains InterPro domain Transmembrane receptor, eukaryota; (InterPro:IPR00963…
Glyma07g14850.N3	j	PAC:26349305	TSS25517	No	NO Cluster	AT1G61670	'35.2'	'not assigned.unknown'	'highly similar to ( 603)AT1G61670| Symbols: | similar to unknown protein [Arabidopsis thaliana] (TAIR:AT1G10980.1); similar to hypothetical protein [Vitis vinifera] (GB:CAN66485.1); similar to unnamed protein product [Vitis vinifera] (GB:CAO41520.1); similar to unnamed protein product [Vitis vinifera] (GB:CAO48876.1); contains InterPro domain Transmembrane receptor, eukaryota; (InterPro:IPR00963…
Glyma07g14850.N4	j	PAC:26349305	TSS25517	No	NO Cluster	AT1G61670	'35.2'	'not assigned.unknown'	'highly similar to ( 603)AT1G61670| Symbols: | similar to unknown protein [Arabidopsis thaliana] (TAIR:AT1G10980.1); similar to hypothetical protein [Vitis vinifera] (GB:CAN66485.1); similar to unnamed protein product [Vitis vinifera] (GB:CAO41520.1); similar to unnamed protein product [Vitis vinifera] (GB:CAO48876.1); contains InterPro domain Transmembrane receptor, eukaryota; (InterPro:IPR00963…
Glyma03g17410.1	=	PAC:26334488	TSS8122	Yes	55	AT3G53940	'34.9'	'transport.metabolite transporters at the mitochondrial membrane'	'moderately similar to ( 457)AT3G53940| Symbols: | mitochondrial substrate carrier family protein | chr3:19982236-19984542 REVERSEweakly similar to ( 143)BT1_MAIZE no original description'
Glyma03g17410.N3	j	PAC:26334488	TSS8122	No	NO Cluster	AT3G53940	'34.9'	'transport.metabolite transporters at the mitochondrial membrane'	'moderately similar to ( 457)AT3G53940| Symbols: | mitochondrial substrate carrier family protein | chr3:19982236-19984542 REVERSEweakly similar to ( 143)BT1_MAIZE no original description'
Glyma03g17410.N4	j	PAC:26334488	TSS8122	No	NO Cluster	AT3G53940	'34.9'	'transport.metabolite transporters at the mitochondrial membrane'	'moderately similar to ( 457)AT3G53940| Symbols: | mitochondrial substrate carrier family protein | chr3:19982236-19984542 REVERSEweakly similar to ( 143)BT1_MAIZE no original description'
Glyma03g17410.N2	j	PAC:26334488	TSS8122	No	NO Cluster	AT3G53940	'34.9'	'transport.metabolite transporters at the mitochondrial membrane'	'moderately similar to ( 457)AT3G53940| Symbols: | mitochondrial substrate carrier family protein | chr3:19982236-19984542 REVERSEweakly similar to ( 143)BT1_MAIZE no original description'
Glyma04g05960.2	=	PAC:26305284	TSS13387	No	NO Cluster	AT2G26300	'30.5'	'signalling.G-proteins'	'highly similar to ( 632)AT2G26300| Symbols: ATGPA1, GP ALPHA 1, GPA1 | GPA1 (G PROTEIN ALPHA SUBUNIT 1); signal transducer | chr2:11205165-11207900 FORWARDhighly similar to ( 683)GPA1_SOYBN no original description'
Glyma04g05960.3	=	PAC:26305286	TSS13389	No	NO Cluster	AT2G26300	'30.5'	'signalling.G-proteins'	'highly similar to ( 632)AT2G26300| Symbols: ATGPA1, GP ALPHA 1, GPA1 | GPA1 (G PROTEIN ALPHA SUBUNIT 1); signal transducer | chr2:11205165-11207900 FORWARDhighly similar to ( 683)GPA1_SOYBN no original description'
Glyma04g05960.N11	j	PAC:26305285	TSS13388	No	NO Cluster	AT2G26300	'30.5'	'signalling.G-proteins'	'highly similar to ( 632)AT2G26300| Symbols: ATGPA1, GP ALPHA 1, GPA1 | GPA1 (G PROTEIN ALPHA SUBUNIT 1); signal transducer | chr2:11205165-11207900 FORWARDhighly similar to ( 683)GPA1_SOYBN no original description'
Glyma04g05960.1	=	PAC:26305285	TSS13388	No	NO Cluster	AT2G26300	'30.5'	'signalling.G-proteins'	'highly similar to ( 632)AT2G26300| Symbols: ATGPA1, GP ALPHA 1, GPA1 | GPA1 (G PROTEIN ALPHA SUBUNIT 1); signal transducer | chr2:11205165-11207900 FORWARDhighly similar to ( 683)GPA1_SOYBN no original description'
Glyma04g05960.N10	j	PAC:26305285	TSS13388	No	NO Cluster	AT2G26300	'30.5'	'signalling.G-proteins'	'highly similar to ( 632)AT2G26300| Symbols: ATGPA1, GP ALPHA 1, GPA1 | GPA1 (G PROTEIN ALPHA SUBUNIT 1); signal transducer | chr2:11205165-11207900 FORWARDhighly similar to ( 683)GPA1_SOYBN no original description'
Glyma04g05960.N7	j	PAC:26305285	TSS13387	No	NO Cluster	AT2G26300	'30.5'	'signalling.G-proteins'	'highly similar to ( 632)AT2G26300| Symbols: ATGPA1, GP ALPHA 1, GPA1 | GPA1 (G PROTEIN ALPHA SUBUNIT 1); signal transducer | chr2:11205165-11207900 FORWARDhighly similar to ( 683)GPA1_SOYBN no original description'
Glyma04g05960.N6	j	PAC:26305285	TSS13386	Yes	36	AT2G26300	'30.5'	'signalling.G-proteins'	'highly similar to ( 632)AT2G26300| Symbols: ATGPA1, GP ALPHA 1, GPA1 | GPA1 (G PROTEIN ALPHA SUBUNIT 1); signal transducer | chr2:11205165-11207900 FORWARDhighly similar to ( 683)GPA1_SOYBN no original description'
Glyma04g05960.N8	j	PAC:26305285	TSS13388	No	NO Cluster	AT2G26300	'30.5'	'signalling.G-proteins'	'highly similar to ( 632)AT2G26300| Symbols: ATGPA1, GP ALPHA 1, GPA1 | GPA1 (G PROTEIN ALPHA SUBUNIT 1); signal transducer | chr2:11205165-11207900 FORWARDhighly similar to ( 683)GPA1_SOYBN no original description'
Glyma04g05960.N5	j	PAC:26305285	TSS13386	No	NO Cluster	AT2G26300	'30.5'	'signalling.G-proteins'	'highly similar to ( 632)AT2G26300| Symbols: ATGPA1, GP ALPHA 1, GPA1 | GPA1 (G PROTEIN ALPHA SUBUNIT 1); signal transducer | chr2:11205165-11207900 FORWARDhighly similar to ( 683)GPA1_SOYBN no original description'
Glyma07g06050.1	=	PAC:26348584	TSS25066	Yes	9	AT4G00950	'27.3.8'	'RNA.regulation of transcription.C2C2(Zn) DOF zinc finger family'	'very weakly similar to (88.2)AT4G00950| Symbols: MEE47 | MEE47 (maternal effect embryo arrest 47); transcription factor | chr4:405984-407087 REVERSE no original description'
Glyma07g06050.N2	j	PAC:26348584	TSS25066	No	NO Cluster	AT4G00950	'27.3.8'	'RNA.regulation of transcription.C2C2(Zn) DOF zinc finger family'	'very weakly similar to (88.2)AT4G00950| Symbols: MEE47 | MEE47 (maternal effect embryo arrest 47); transcription factor | chr4:405984-407087 REVERSE no original description'
Glyma08g26070.4	=	PAC:26310913	TSS28310	No	NO Cluster	No Arabidopsis Homolohue	'35.2'	'not assigned.unknown'	'no original description'
Glyma08g26070.2	=	PAC:26310914	TSS28310	No	NO Cluster	No Arabidopsis Homolohue	'35.2'	'not assigned.unknown'	'no original description'
Glyma08g26070.N5	j	PAC:26310913	TSS28310	No	NO Cluster	No Arabidopsis Homolohue	'35.2'	'not assigned.unknown'	'no original description'
Glyma08g26070.1	=	PAC:26310912	TSS28310	Yes	41	No Arabidopsis Homolohue	'35.2'	'not assigned.unknown'	'no original description'
Glyma08g26070.3	=	PAC:26310915	TSS28310	No	NO Cluster	No Arabidopsis Homolohue	'35.2'	'not assigned.unknown'	'no original description'
Glyma03g24990.N2	j	PAC:26334678	TSS10089	Yes	32	AT2G05170	'29.3.4.3'	'protein.targeting.secretory pathway.vacuole'	'nearly identical (1427)AT2G05170| Symbols: ATVPS11 | ATVPS11 (Arabidopsis thaliana vacuolar protein sorting 11); transporter | chr2:1870017-1873275 FORWARD no original description'
Glyma03g24990.1	=	PAC:26334678	TSS10088	No	NO Cluster	AT2G05170	'29.3.4.3'	'protein.targeting.secretory pathway.vacuole'	'nearly identical (1427)AT2G05170| Symbols: ATVPS11 | ATVPS11 (Arabidopsis thaliana vacuolar protein sorting 11); transporter | chr2:1870017-1873275 FORWARD no original description'
Glyma03g24990.N3	j	PAC:26334678	TSS10089	No	NO Cluster	AT2G05170	'29.3.4.3'	'protein.targeting.secretory pathway.vacuole'	'nearly identical (1427)AT2G05170| Symbols: ATVPS11 | ATVPS11 (Arabidopsis thaliana vacuolar protein sorting 11); transporter | chr2:1870017-1873275 FORWARD no original description'
Glyma11g16210.N3	j	PAC:26297573	TSS40980	No	NO Cluster	AT5G13780	'13.2.2.1'	'amino acid metabolism.degradation.glutamate family.glutamine'	'moderately similar to ( 285)AT5G13780| Symbols: | GCN5-related N-acetyltransferase, putative | chr5:4447613-4448606 REVERSE no original description'
Glyma11g16210.N4	j	PAC:26297573	TSS40980	No	NO Cluster	AT5G13780	'13.2.2.1'	'amino acid metabolism.degradation.glutamate family.glutamine'	'moderately similar to ( 285)AT5G13780| Symbols: | GCN5-related N-acetyltransferase, putative | chr5:4447613-4448606 REVERSE no original description'
Glyma11g16210.N2	j	PAC:26297573	TSS40980	Yes	55	AT5G13780	'13.2.2.1'	'amino acid metabolism.degradation.glutamate family.glutamine'	'moderately similar to ( 285)AT5G13780| Symbols: | GCN5-related N-acetyltransferase, putative | chr5:4447613-4448606 REVERSE no original description'
Glyma11g16210.1	=	PAC:26297573	TSS40980	No	NO Cluster	AT5G13780	'13.2.2.1'	'amino acid metabolism.degradation.glutamate family.glutamine'	'moderately similar to ( 285)AT5G13780| Symbols: | GCN5-related N-acetyltransferase, putative | chr5:4447613-4448606 REVERSE no original description'
Glyma11g16210.N5	j	PAC:26297573	TSS40980	No	NO Cluster	AT5G13780	'13.2.2.1'	'amino acid metabolism.degradation.glutamate family.glutamine'	'moderately similar to ( 285)AT5G13780| Symbols: | GCN5-related N-acetyltransferase, putative | chr5:4447613-4448606 REVERSE no original description'
Glyma15g12170.1	=	PAC:26330542	TSS55915	Yes	44	No Arabidopsis Homolohue	'35.2'	'not assigned.unknown'	'no original description'
Glyma15g12170.N2	j	PAC:26330542	TSS55916	No	NO Cluster	No Arabidopsis Homolohue	'35.2'	'not assigned.unknown'	'no original description'
Glyma02g38821.N2	o	PAC:26291085	TSS6895	Yes	29	NO MapMan Annotation
Glyma02g38821.1	=	PAC:26291085	TSS6896	No	NO Cluster	NO MapMan Annotation
Glyma08g44590.N3	j	PAC:26309116	TSS31417	No	NO Cluster	AT5G56000	'20.2.1'	'stress.abiotic.heat'	'nearly identical (1056)AT5G56000| Symbols: | heat shock protein 81-4 (HSP81-4) | chr5:22694828-22697293 REVERSEnearly identical (1047)HSP81_ORYSA no original description'
Glyma08g44590.N2	j	PAC:26309116	TSS31417	Yes	30	AT5G56000	'20.2.1'	'stress.abiotic.heat'	'nearly identical (1056)AT5G56000| Symbols: | heat shock protein 81-4 (HSP81-4) | chr5:22694828-22697293 REVERSEnearly identical (1047)HSP81_ORYSA no original description'
Glyma08g44590.1	=	PAC:26309116	TSS31417	No	NO Cluster	AT5G56000	'20.2.1'	'stress.abiotic.heat'	'nearly identical (1056)AT5G56000| Symbols: | heat shock protein 81-4 (HSP81-4) | chr5:22694828-22697293 REVERSEnearly identical (1047)HSP81_ORYSA no original description'
Glyma18g05080.2	=	PAC:26354730	TSS65916	Yes	30	AT4G10710	'27.3.52'	'RNA.regulation of transcription.Global transcription factor group'	'nearly identical (1391)AT4G10710| Symbols: SPT16 | SPT16 (GLOBAL TRANSCRIPTION FACTOR C); metalloexopeptidase | chr4:6602222-6605446 REVERSEnearly identical (1353)SPT16_ORYSA no original description'
Glyma18g05080.N4	j	PAC:26354731	TSS65916	No	NO Cluster	AT4G10710	'27.3.52'	'RNA.regulation of transcription.Global transcription factor group'	'nearly identical (1391)AT4G10710| Symbols: SPT16 | SPT16 (GLOBAL TRANSCRIPTION FACTOR C); metalloexopeptidase | chr4:6602222-6605446 REVERSEnearly identical (1353)SPT16_ORYSA no original description'
Glyma18g05080.3	=	PAC:26354731	TSS65916	No	NO Cluster	AT4G10710	'27.3.52'	'RNA.regulation of transcription.Global transcription factor group'	'nearly identical (1391)AT4G10710| Symbols: SPT16 | SPT16 (GLOBAL TRANSCRIPTION FACTOR C); metalloexopeptidase | chr4:6602222-6605446 REVERSEnearly identical (1353)SPT16_ORYSA no original description'
Glyma18g05080.N5	j	PAC:26354731	TSS65917	No	NO Cluster	AT4G10710	'27.3.52'	'RNA.regulation of transcription.Global transcription factor group'	'nearly identical (1391)AT4G10710| Symbols: SPT16 | SPT16 (GLOBAL TRANSCRIPTION FACTOR C); metalloexopeptidase | chr4:6602222-6605446 REVERSEnearly identical (1353)SPT16_ORYSA no original description'
Glyma15g11470.1	=	PAC:26332834	TSS55875	Yes	113	AT1G11700	'35.2'	'not assigned.unknown'	'weakly similar to ( 145)AT1G11700| Symbols: | similar to unknown protein [Arabidopsis thaliana] (TAIR:AT1G61930.1); similar to unnamed protein product [Vitis vinifera] (GB:CAO17934.1); contains InterPro domain Protein of unknown function DUF584 (InterPro:IPR007608) | chr1:3945852-3946457 FORWARD no original description'
Glyma15g11470.N2	o	PAC:26332834	TSS55875	No	NO Cluster	AT1G11700	'35.2'	'not assigned.unknown'	'weakly similar to ( 145)AT1G11700| Symbols: | similar to unknown protein [Arabidopsis thaliana] (TAIR:AT1G61930.1); similar to unnamed protein product [Vitis vinifera] (GB:CAO17934.1); contains InterPro domain Protein of unknown function DUF584 (InterPro:IPR007608) | chr1:3945852-3946457 FORWARD no original description'
Glyma04g41530.N2	j	PAC:26303979	TSS14526	No	NO Cluster	AT5G06160	'27.1.1'	'RNA.processing.splicing'	'highly similar to ( 674)AT5G06160| Symbols: | splicing factor-related | chr5:1862624-1866299 REVERSE no original description'
Glyma04g41530.N3	j	PAC:26303979	TSS14526	No	NO Cluster	AT5G06160	'27.1.1'	'RNA.processing.splicing'	'highly similar to ( 674)AT5G06160| Symbols: | splicing factor-related | chr5:1862624-1866299 REVERSE no original description'
Glyma04g41530.1	=	PAC:26303979	TSS14526	Yes	73	AT5G06160	'27.1.1'	'RNA.processing.splicing'	'highly similar to ( 674)AT5G06160| Symbols: | splicing factor-related | chr5:1862624-1866299 REVERSE no original description'
Glyma08g20090.3	=	PAC:26310877	TSS30508	Yes	103	AT1G60940	'29.4'	'protein.postranslational modification'	'highly similar to ( 599)AT1G60940| Symbols: SNRK2-10, SNRK2.10, SRK2B | SNRK2-10/SNRK2.10/SRK2B (SNF1-RELATED PROTEIN KINASE 2.10); kinase | chr1:22443063-22445561 REVERSEhighly similar to ( 578)SAPK6_ORYSA no original description'
Glyma08g20090.N17	j	PAC:26310878	TSS30508	No	NO Cluster	AT1G60940	'29.4'	'protein.postranslational modification'	'highly similar to ( 599)AT1G60940| Symbols: SNRK2-10, SNRK2.10, SRK2B | SNRK2-10/SNRK2.10/SRK2B (SNF1-RELATED PROTEIN KINASE 2.10); kinase | chr1:22443063-22445561 REVERSEhighly similar to ( 578)SAPK6_ORYSA no original description'
Glyma08g20090.N14	j	PAC:26310878	TSS30508	No	NO Cluster	AT1G60940	'29.4'	'protein.postranslational modification'	'highly similar to ( 599)AT1G60940| Symbols: SNRK2-10, SNRK2.10, SRK2B | SNRK2-10/SNRK2.10/SRK2B (SNF1-RELATED PROTEIN KINASE 2.10); kinase | chr1:22443063-22445561 REVERSEhighly similar to ( 578)SAPK6_ORYSA no original description'
Glyma08g20090.N13	j	PAC:26310878	TSS30508	No	NO Cluster	AT1G60940	'29.4'	'protein.postranslational modification'	'highly similar to ( 599)AT1G60940| Symbols: SNRK2-10, SNRK2.10, SRK2B | SNRK2-10/SNRK2.10/SRK2B (SNF1-RELATED PROTEIN KINASE 2.10); kinase | chr1:22443063-22445561 REVERSEhighly similar to ( 578)SAPK6_ORYSA no original description'
Glyma08g20090.N16	j	PAC:26310878	TSS30508	No	NO Cluster	AT1G60940	'29.4'	'protein.postranslational modification'	'highly similar to ( 599)AT1G60940| Symbols: SNRK2-10, SNRK2.10, SRK2B | SNRK2-10/SNRK2.10/SRK2B (SNF1-RELATED PROTEIN KINASE 2.10); kinase | chr1:22443063-22445561 REVERSEhighly similar to ( 578)SAPK6_ORYSA no original description'
Glyma08g20090.N15	j	PAC:26310878	TSS30508	No	NO Cluster	AT1G60940	'29.4'	'protein.postranslational modification'	'highly similar to ( 599)AT1G60940| Symbols: SNRK2-10, SNRK2.10, SRK2B | SNRK2-10/SNRK2.10/SRK2B (SNF1-RELATED PROTEIN KINASE 2.10); kinase | chr1:22443063-22445561 REVERSEhighly similar to ( 578)SAPK6_ORYSA no original description'
Glyma08g20090.N10	j	PAC:26310878	TSS30508	No	NO Cluster	AT1G60940	'29.4'	'protein.postranslational modification'	'highly similar to ( 599)AT1G60940| Symbols: SNRK2-10, SNRK2.10, SRK2B | SNRK2-10/SNRK2.10/SRK2B (SNF1-RELATED PROTEIN KINASE 2.10); kinase | chr1:22443063-22445561 REVERSEhighly similar to ( 578)SAPK6_ORYSA no original description'
Glyma08g20090.N9	j	PAC:26310878	TSS30508	No	NO Cluster	AT1G60940	'29.4'	'protein.postranslational modification'	'highly similar to ( 599)AT1G60940| Symbols: SNRK2-10, SNRK2.10, SRK2B | SNRK2-10/SNRK2.10/SRK2B (SNF1-RELATED PROTEIN KINASE 2.10); kinase | chr1:22443063-22445561 REVERSEhighly similar to ( 578)SAPK6_ORYSA no original description'
Glyma08g20090.N12	j	PAC:26310878	TSS30508	No	NO Cluster	AT1G60940	'29.4'	'protein.postranslational modification'	'highly similar to ( 599)AT1G60940| Symbols: SNRK2-10, SNRK2.10, SRK2B | SNRK2-10/SNRK2.10/SRK2B (SNF1-RELATED PROTEIN KINASE 2.10); kinase | chr1:22443063-22445561 REVERSEhighly similar to ( 578)SAPK6_ORYSA no original description'
Glyma08g20090.N11	j	PAC:26310878	TSS30508	No	NO Cluster	AT1G60940	'29.4'	'protein.postranslational modification'	'highly similar to ( 599)AT1G60940| Symbols: SNRK2-10, SNRK2.10, SRK2B | SNRK2-10/SNRK2.10/SRK2B (SNF1-RELATED PROTEIN KINASE 2.10); kinase | chr1:22443063-22445561 REVERSEhighly similar to ( 578)SAPK6_ORYSA no original description'
Glyma08g20090.4	=	PAC:26310878	TSS30508	No	NO Cluster	AT1G60940	'29.4'	'protein.postranslational modification'	'highly similar to ( 599)AT1G60940| Symbols: SNRK2-10, SNRK2.10, SRK2B | SNRK2-10/SNRK2.10/SRK2B (SNF1-RELATED PROTEIN KINASE 2.10); kinase | chr1:22443063-22445561 REVERSEhighly similar to ( 578)SAPK6_ORYSA no original description'
Glyma08g20090.N7	j	PAC:26310878	TSS30508	No	NO Cluster	AT1G60940	'29.4'	'protein.postranslational modification'	'highly similar to ( 599)AT1G60940| Symbols: SNRK2-10, SNRK2.10, SRK2B | SNRK2-10/SNRK2.10/SRK2B (SNF1-RELATED PROTEIN KINASE 2.10); kinase | chr1:22443063-22445561 REVERSEhighly similar to ( 578)SAPK6_ORYSA no original description'
Glyma08g20090.N8	j	PAC:26310878	TSS30508	No	NO Cluster	AT1G60940	'29.4'	'protein.postranslational modification'	'highly similar to ( 599)AT1G60940| Symbols: SNRK2-10, SNRK2.10, SRK2B | SNRK2-10/SNRK2.10/SRK2B (SNF1-RELATED PROTEIN KINASE 2.10); kinase | chr1:22443063-22445561 REVERSEhighly similar to ( 578)SAPK6_ORYSA no original description'
Glyma08g20090.N5	j	PAC:26310878	TSS30508	No	NO Cluster	AT1G60940	'29.4'	'protein.postranslational modification'	'highly similar to ( 599)AT1G60940| Symbols: SNRK2-10, SNRK2.10, SRK2B | SNRK2-10/SNRK2.10/SRK2B (SNF1-RELATED PROTEIN KINASE 2.10); kinase | chr1:22443063-22445561 REVERSEhighly similar to ( 578)SAPK6_ORYSA no original description'
Glyma08g20090.N6	j	PAC:26310878	TSS30508	No	NO Cluster	AT1G60940	'29.4'	'protein.postranslational modification'	'highly similar to ( 599)AT1G60940| Symbols: SNRK2-10, SNRK2.10, SRK2B | SNRK2-10/SNRK2.10/SRK2B (SNF1-RELATED PROTEIN KINASE 2.10); kinase | chr1:22443063-22445561 REVERSEhighly similar to ( 578)SAPK6_ORYSA no original description'
Glyma07g10000.1	=	PAC:26349602	TSS25300	Yes	25	AT3G25800	'29.4'	'protein.postranslational modification'	'nearly identical (1045)AT3G25800| Symbols: PR 65, PR65, PDF1 | PDF1 (65 KDA REGULATORY SUBUNIT OF PROTEIN PHOSPHATASE 2A); protein phosphatase type 2A regulator | chr3:9424273-9427020 REVERSEhighly similar to ( 709)2AAA_PEA no original description'
Glyma07g10000.N2	j	PAC:26349602	TSS25299	No	NO Cluster	AT3G25800	'29.4'	'protein.postranslational modification'	'nearly identical (1045)AT3G25800| Symbols: PR 65, PR65, PDF1 | PDF1 (65 KDA REGULATORY SUBUNIT OF PROTEIN PHOSPHATASE 2A); protein phosphatase type 2A regulator | chr3:9424273-9427020 REVERSEhighly similar to ( 709)2AAA_PEA no original description'
Glyma07g10000.N3	j	PAC:26349602	TSS25299	No	NO Cluster	AT3G25800	'29.4'	'protein.postranslational modification'	'nearly identical (1045)AT3G25800| Symbols: PR 65, PR65, PDF1 | PDF1 (65 KDA REGULATORY SUBUNIT OF PROTEIN PHOSPHATASE 2A); protein phosphatase type 2A regulator | chr3:9424273-9427020 REVERSEhighly similar to ( 709)2AAA_PEA no original description'
Glyma07g10000.N4	j	PAC:26349602	TSS25300	No	NO Cluster	AT3G25800	'29.4'	'protein.postranslational modification'	'nearly identical (1045)AT3G25800| Symbols: PR 65, PR65, PDF1 | PDF1 (65 KDA REGULATORY SUBUNIT OF PROTEIN PHOSPHATASE 2A); protein phosphatase type 2A regulator | chr3:9424273-9427020 REVERSEhighly similar to ( 709)2AAA_PEA no original description'
Glyma07g10000.N5	j	PAC:26349602	TSS25300	No	NO Cluster	AT3G25800	'29.4'	'protein.postranslational modification'	'nearly identical (1045)AT3G25800| Symbols: PR 65, PR65, PDF1 | PDF1 (65 KDA REGULATORY SUBUNIT OF PROTEIN PHOSPHATASE 2A); protein phosphatase type 2A regulator | chr3:9424273-9427020 REVERSEhighly similar to ( 709)2AAA_PEA no original description'
Glyma08g39090.N2	j	PAC:26310769	TSS28640	No	NO Cluster	AT1G60770	'27.3.67'	'RNA.regulation of transcription.putative transcription regulator'	'highly similar to ( 606)AT1G60770| Symbols: | pentatricopeptide (PPR) repeat-containing protein | chr1:22370624-22372313 REVERSE no original description'
Glyma08g39090.1	=	PAC:26310769	TSS28640	No	NO Cluster	AT1G60770	'27.3.67'	'RNA.regulation of transcription.putative transcription regulator'	'highly similar to ( 606)AT1G60770| Symbols: | pentatricopeptide (PPR) repeat-containing protein | chr1:22370624-22372313 REVERSE no original description'
Glyma08g39090.N3	j	PAC:26310769	TSS28640	Yes	58	AT1G60770	'27.3.67'	'RNA.regulation of transcription.putative transcription regulator'	'highly similar to ( 606)AT1G60770| Symbols: | pentatricopeptide (PPR) repeat-containing protein | chr1:22370624-22372313 REVERSE no original description'
Glyma11g08931.1	=	PAC:26294749	TSS40508	Yes	53	NO MapMan Annotation
Glyma11g08931.N5	j	PAC:26294749	TSS40508	No	NO Cluster	NO MapMan Annotation
Glyma11g08931.N2	j	PAC:26294749	TSS40508	No	NO Cluster	NO MapMan Annotation
Glyma11g08931.N4	j	PAC:26294749	TSS40508	No	NO Cluster	NO MapMan Annotation
Glyma11g08931.N3	j	PAC:26294749	TSS40508	No	NO Cluster	NO MapMan Annotation
Glyma01g37010.N2	j	PAC:26323652	TSS2675	No	NO Cluster	AT2G17850	'33.99'	'development.unspecified'	'weakly similar to ( 163)AT2G17850| Symbols: | similar to unknown protein [Arabidopsis thaliana] (TAIR:AT5G66170.2); similar to unnamed protein product [Vitis vinifera] (GB:CAO48196.1); contains InterPro domain Rhodanese-like (InterPro:IPR001763) | chr2:7767087-7767869 REVERSEweakly similar to ( 112)DIN1_RAPSA no original description'
Glyma01g37010.N3	j	PAC:26323652	TSS2676	No	NO Cluster	AT2G17850	'33.99'	'development.unspecified'	'weakly similar to ( 163)AT2G17850| Symbols: | similar to unknown protein [Arabidopsis thaliana] (TAIR:AT5G66170.2); similar to unnamed protein product [Vitis vinifera] (GB:CAO48196.1); contains InterPro domain Rhodanese-like (InterPro:IPR001763) | chr2:7767087-7767869 REVERSEweakly similar to ( 112)DIN1_RAPSA no original description'
Glyma01g37010.N7	j	PAC:26323652	TSS2676	No	NO Cluster	AT2G17850	'33.99'	'development.unspecified'	'weakly similar to ( 163)AT2G17850| Symbols: | similar to unknown protein [Arabidopsis thaliana] (TAIR:AT5G66170.2); similar to unnamed protein product [Vitis vinifera] (GB:CAO48196.1); contains InterPro domain Rhodanese-like (InterPro:IPR001763) | chr2:7767087-7767869 REVERSEweakly similar to ( 112)DIN1_RAPSA no original description'
Glyma01g37010.1	=	PAC:26323652	TSS2676	Yes	103	AT2G17850	'33.99'	'development.unspecified'	'weakly similar to ( 163)AT2G17850| Symbols: | similar to unknown protein [Arabidopsis thaliana] (TAIR:AT5G66170.2); similar to unnamed protein product [Vitis vinifera] (GB:CAO48196.1); contains InterPro domain Rhodanese-like (InterPro:IPR001763) | chr2:7767087-7767869 REVERSEweakly similar to ( 112)DIN1_RAPSA no original description'
Glyma01g37010.N4	j	PAC:26323652	TSS2676	No	NO Cluster	AT2G17850	'33.99'	'development.unspecified'	'weakly similar to ( 163)AT2G17850| Symbols: | similar to unknown protein [Arabidopsis thaliana] (TAIR:AT5G66170.2); similar to unnamed protein product [Vitis vinifera] (GB:CAO48196.1); contains InterPro domain Rhodanese-like (InterPro:IPR001763) | chr2:7767087-7767869 REVERSEweakly similar to ( 112)DIN1_RAPSA no original description'
Glyma01g37010.N5	j	PAC:26323652	TSS2676	No	NO Cluster	AT2G17850	'33.99'	'development.unspecified'	'weakly similar to ( 163)AT2G17850| Symbols: | similar to unknown protein [Arabidopsis thaliana] (TAIR:AT5G66170.2); similar to unnamed protein product [Vitis vinifera] (GB:CAO48196.1); contains InterPro domain Rhodanese-like (InterPro:IPR001763) | chr2:7767087-7767869 REVERSEweakly similar to ( 112)DIN1_RAPSA no original description'
Glyma01g37010.N6	j	PAC:26323652	TSS2676	No	NO Cluster	AT2G17850	'33.99'	'development.unspecified'	'weakly similar to ( 163)AT2G17850| Symbols: | similar to unknown protein [Arabidopsis thaliana] (TAIR:AT5G66170.2); similar to unnamed protein product [Vitis vinifera] (GB:CAO48196.1); contains InterPro domain Rhodanese-like (InterPro:IPR001763) | chr2:7767087-7767869 REVERSEweakly similar to ( 112)DIN1_RAPSA no original description'
Glyma04g01421.N4	j	PAC:26303669	TSS13102	No	NO Cluster	NO MapMan Annotation
Glyma04g01421.N5	j	PAC:26303669	TSS13102	No	NO Cluster	NO MapMan Annotation
Glyma04g01421.N6	j	PAC:26303669	TSS13102	No	NO Cluster	NO MapMan Annotation
Glyma04g01421.N7	j	PAC:26303669	TSS13103	No	NO Cluster	NO MapMan Annotation
Glyma04g01421.N8	j	PAC:26303669	TSS13103	No	NO Cluster	NO MapMan Annotation
Glyma04g01421.N2	j	PAC:26303669	TSS13102	No	NO Cluster	NO MapMan Annotation
Glyma04g01421.N3	j	PAC:26303669	TSS13102	No	NO Cluster	NO MapMan Annotation
Glyma04g01421.1	=	PAC:26303669	TSS13104	Yes	48	NO MapMan Annotation
Glyma03g22620.N2	x	PAC:26334078	TSS8216	No	NO Cluster	AT3G48770	'35.2'	'not assigned.unknown'	'nearly identical (1583)AT3G48770| Symbols: | ATP binding / DNA binding | chr3:18090246-18097802 REVERSE no original description'
Glyma03g22620.1	=	PAC:26334078	TSS10019	Yes	47	AT3G48770	'35.2'	'not assigned.unknown'	'nearly identical (1583)AT3G48770| Symbols: | ATP binding / DNA binding | chr3:18090246-18097802 REVERSE no original description'
Glyma03g22620.N5	j	PAC:26334078	TSS10019	No	NO Cluster	AT3G48770	'35.2'	'not assigned.unknown'	'nearly identical (1583)AT3G48770| Symbols: | ATP binding / DNA binding | chr3:18090246-18097802 REVERSE no original description'
Glyma03g22620.N4	j	PAC:26334078	TSS10019	No	NO Cluster	AT3G48770	'35.2'	'not assigned.unknown'	'nearly identical (1583)AT3G48770| Symbols: | ATP binding / DNA binding | chr3:18090246-18097802 REVERSE no original description'
Glyma03g22620.N3	j	PAC:26334078	TSS10019	No	NO Cluster	AT3G48770	'35.2'	'not assigned.unknown'	'nearly identical (1583)AT3G48770| Symbols: | ATP binding / DNA binding | chr3:18090246-18097802 REVERSE no original description'
Glyma08g43740.N5	j	PAC:26307285	TSS31369	No	NO Cluster	AT3G07810	'27.4'	'RNA.RNA binding'	'moderately similar to ( 356)AT3G07810| Symbols: | heterogeneous nuclear ribonucleoprotein, putative / hnRNP, putative | chr3:2492881-2495108 FORWARD no original description'
Glyma08g43740.N4	j	PAC:26307285	TSS31369	No	NO Cluster	AT3G07810	'27.4'	'RNA.RNA binding'	'moderately similar to ( 356)AT3G07810| Symbols: | heterogeneous nuclear ribonucleoprotein, putative / hnRNP, putative | chr3:2492881-2495108 FORWARD no original description'
Glyma08g43740.N8	j	PAC:26307285	TSS31369	No	NO Cluster	AT3G07810	'27.4'	'RNA.RNA binding'	'moderately similar to ( 356)AT3G07810| Symbols: | heterogeneous nuclear ribonucleoprotein, putative / hnRNP, putative | chr3:2492881-2495108 FORWARD no original description'
Glyma08g43740.1	=	PAC:26307284	TSS31369	Yes	36	AT3G07810	'27.4'	'RNA.RNA binding'	'moderately similar to ( 356)AT3G07810| Symbols: | heterogeneous nuclear ribonucleoprotein, putative / hnRNP, putative | chr3:2492881-2495108 FORWARD no original description'
Glyma08g43740.2	=	PAC:26307285	TSS31369	No	NO Cluster	AT3G07810	'27.4'	'RNA.RNA binding'	'moderately similar to ( 356)AT3G07810| Symbols: | heterogeneous nuclear ribonucleoprotein, putative / hnRNP, putative | chr3:2492881-2495108 FORWARD no original description'
Glyma08g43740.N7	j	PAC:26307285	TSS31369	No	NO Cluster	AT3G07810	'27.4'	'RNA.RNA binding'	'moderately similar to ( 356)AT3G07810| Symbols: | heterogeneous nuclear ribonucleoprotein, putative / hnRNP, putative | chr3:2492881-2495108 FORWARD no original description'
Glyma08g43740.N6	j	PAC:26307285	TSS31369	No	NO Cluster	AT3G07810	'27.4'	'RNA.RNA binding'	'moderately similar to ( 356)AT3G07810| Symbols: | heterogeneous nuclear ribonucleoprotein, putative / hnRNP, putative | chr3:2492881-2495108 FORWARD no original description'
Glyma08g43740.N3	s	PAC:26307284	TSS28941	No	NO Cluster	AT3G07810	'27.4'	'RNA.RNA binding'	'moderately similar to ( 356)AT3G07810| Symbols: | heterogeneous nuclear ribonucleoprotein, putative / hnRNP, putative | chr3:2492881-2495108 FORWARD no original description'
Glyma05g30340.1	=	PAC:26321462	TSS17647	No	NO Cluster	AT1G10780	'29.5.11.4.3.2'	'protein.degradation.ubiquitin.E3.SCF.FBOX'	'highly similar to ( 559)AT1G10780| Symbols: | F-box family protein | chr1:3592876-3594311 REVERSE no original description'
Glyma05g30340.N5	j	PAC:26321462	TSS17647	No	NO Cluster	AT1G10780	'29.5.11.4.3.2'	'protein.degradation.ubiquitin.E3.SCF.FBOX'	'highly similar to ( 559)AT1G10780| Symbols: | F-box family protein | chr1:3592876-3594311 REVERSE no original description'
Glyma05g30340.N4	j	PAC:26321462	TSS17647	No	NO Cluster	AT1G10780	'29.5.11.4.3.2'	'protein.degradation.ubiquitin.E3.SCF.FBOX'	'highly similar to ( 559)AT1G10780| Symbols: | F-box family protein | chr1:3592876-3594311 REVERSE no original description'
Glyma05g30340.2	=	PAC:26321463	TSS17646	Yes	14	AT1G10780	'29.5.11.4.3.2'	'protein.degradation.ubiquitin.E3.SCF.FBOX'	'highly similar to ( 559)AT1G10780| Symbols: | F-box family protein | chr1:3592876-3594311 REVERSE no original description'
Glyma05g30340.N3	j	PAC:26321462	TSS17646	No	NO Cluster	AT1G10780	'29.5.11.4.3.2'	'protein.degradation.ubiquitin.E3.SCF.FBOX'	'highly similar to ( 559)AT1G10780| Symbols: | F-box family protein | chr1:3592876-3594311 REVERSE no original description'
Glyma06g17330.N4	j	PAC:26300590	TSS21662	No	NO Cluster	AT3G26744	'27.3.6'	'RNA.regulation of transcription.bHLH,Basic Helix-Loop-Helix family'	'moderately similar to ( 339)AT3G26744| Symbols: ICE1 | ICE1 (INDUCER OF CBF EXPRESSION 1); DNA binding | chr3:9834190-9836027 REVERSE no original description'
Glyma06g17330.N3	j	PAC:26300590	TSS21662	No	NO Cluster	AT3G26744	'27.3.6'	'RNA.regulation of transcription.bHLH,Basic Helix-Loop-Helix family'	'moderately similar to ( 339)AT3G26744| Symbols: ICE1 | ICE1 (INDUCER OF CBF EXPRESSION 1); DNA binding | chr3:9834190-9836027 REVERSE no original description'
Glyma06g17330.2	=	PAC:26300590	TSS21662	Yes	100	AT3G26744	'27.3.6'	'RNA.regulation of transcription.bHLH,Basic Helix-Loop-Helix family'	'moderately similar to ( 339)AT3G26744| Symbols: ICE1 | ICE1 (INDUCER OF CBF EXPRESSION 1); DNA binding | chr3:9834190-9836027 REVERSE no original description'
Glyma06g17330.N5	j	PAC:26300590	TSS21662	No	NO Cluster	AT3G26744	'27.3.6'	'RNA.regulation of transcription.bHLH,Basic Helix-Loop-Helix family'	'moderately similar to ( 339)AT3G26744| Symbols: ICE1 | ICE1 (INDUCER OF CBF EXPRESSION 1); DNA binding | chr3:9834190-9836027 REVERSE no original description'
Glyma05g03710.N2	j	PAC:26321365	TSS16725	No	NO Cluster	AT4G22910	'27.3.99'	'RNA.regulation of transcription.unclassified'	'highly similar to ( 696)AT4G22910| Symbols: | signal transducer | chr4:12012754-12015674 FORWARD no original description'	'33.99'	'development.unspecified'	'glyma05g03710'	'highly similar to ( 696)AT4G22910| Symbols: | signal transducer | chr4:12012754-12015674 FORWARD no original description'
Glyma05g03710.1	=	PAC:26321365	TSS16725	Yes	35	AT4G22910	'27.3.99'	'RNA.regulation of transcription.unclassified'	'highly similar to ( 696)AT4G22910| Symbols: | signal transducer | chr4:12012754-12015674 FORWARD no original description'	'33.99'	'development.unspecified'	'glyma05g03710'	'highly similar to ( 696)AT4G22910| Symbols: | signal transducer | chr4:12012754-12015674 FORWARD no original description'
Glyma15g12390.N2	j	PAC:26332651	TSS57798	Yes	43	No Arabidopsis Homolohue	'35.2'	'not assigned.unknown'	'no original description'
Glyma15g12390.1	=	PAC:26332651	TSS57798	No	NO Cluster	No Arabidopsis Homolohue	'35.2'	'not assigned.unknown'	'no original description'
Glyma15g12390.N3	j	PAC:26332651	TSS57798	No	NO Cluster	No Arabidopsis Homolohue	'35.2'	'not assigned.unknown'	'no original description'
Glyma19g40790.N6	j	PAC:26326374	TSS71193	No	NO Cluster	AT3G62240	'29.5.11.4.2'	'protein.degradation.ubiquitin.E3.RING'	'moderately similar to ( 330)AT3G62240| Symbols: | zinc finger (C2H2 type) family protein | chr3:23044567-23047628 REVERSE no original description'
Glyma19g40790.N5	j	PAC:26326374	TSS71193	No	NO Cluster	AT3G62240	'29.5.11.4.2'	'protein.degradation.ubiquitin.E3.RING'	'moderately similar to ( 330)AT3G62240| Symbols: | zinc finger (C2H2 type) family protein | chr3:23044567-23047628 REVERSE no original description'
Glyma19g40790.N8	j	PAC:26326374	TSS71193	No	NO Cluster	AT3G62240	'29.5.11.4.2'	'protein.degradation.ubiquitin.E3.RING'	'moderately similar to ( 330)AT3G62240| Symbols: | zinc finger (C2H2 type) family protein | chr3:23044567-23047628 REVERSE no original description'
Glyma19g40790.N7	j	PAC:26326374	TSS71193	No	NO Cluster	AT3G62240	'29.5.11.4.2'	'protein.degradation.ubiquitin.E3.RING'	'moderately similar to ( 330)AT3G62240| Symbols: | zinc finger (C2H2 type) family protein | chr3:23044567-23047628 REVERSE no original description'
Glyma19g40790.3	=	PAC:26326374	TSS71193	No	NO Cluster	AT3G62240	'29.5.11.4.2'	'protein.degradation.ubiquitin.E3.RING'	'moderately similar to ( 330)AT3G62240| Symbols: | zinc finger (C2H2 type) family protein | chr3:23044567-23047628 REVERSE no original description'
Glyma19g40790.2	=	PAC:26326373	TSS71193	Yes	114	AT3G62240	'29.5.11.4.2'	'protein.degradation.ubiquitin.E3.RING'	'moderately similar to ( 330)AT3G62240| Symbols: | zinc finger (C2H2 type) family protein | chr3:23044567-23047628 REVERSE no original description'
Glyma19g40790.N4	j	PAC:26326374	TSS71193	No	NO Cluster	AT3G62240	'29.5.11.4.2'	'protein.degradation.ubiquitin.E3.RING'	'moderately similar to ( 330)AT3G62240| Symbols: | zinc finger (C2H2 type) family protein | chr3:23044567-23047628 REVERSE no original description'
Glyma08g16220.1	=	PAC:26307722	TSS27658	Yes	39	AT3G12610	'30.2.11'	'signalling.receptor kinases.leucine rich repeat XI'	'moderately similar to ( 339)AT3G12610| Symbols: DRT100 | DRT100 (DNA-DAMAGE REPAIR/TOLERATION 100); protein binding | chr3:4006668-4007786 REVERSEweakly similar to ( 131)RPK1_IPONI no original description'
Glyma08g16220.2	=	PAC:26307721	TSS27659	No	NO Cluster	AT3G12610	'30.2.11'	'signalling.receptor kinases.leucine rich repeat XI'	'moderately similar to ( 339)AT3G12610| Symbols: DRT100 | DRT100 (DNA-DAMAGE REPAIR/TOLERATION 100); protein binding | chr3:4006668-4007786 REVERSEweakly similar to ( 131)RPK1_IPONI no original description'
Glyma08g18640.N2	j	PAC:26308848	TSS30413	No	NO Cluster	AT1G78380	'26.9'	'misc.glutathione S transferases'	'moderately similar to ( 300)AT1G78380| Symbols: GST8, ATGSTU19 | ATGSTU19 (GLUTATHIONE TRANSFERASE 8); glutathione transferase | chr1:29491552-29492712 REVERSEmoderately similar to ( 349)LGUL_SOYBN no original description'
Glyma08g18640.1	=	PAC:26308848	TSS30412	Yes	66	AT1G78380	'26.9'	'misc.glutathione S transferases'	'moderately similar to ( 300)AT1G78380| Symbols: GST8, ATGSTU19 | ATGSTU19 (GLUTATHIONE TRANSFERASE 8); glutathione transferase | chr1:29491552-29492712 REVERSEmoderately similar to ( 349)LGUL_SOYBN no original description'
Glyma08g18640.N4	j	PAC:26308848	TSS30414	No	NO Cluster	AT1G78380	'26.9'	'misc.glutathione S transferases'	'moderately similar to ( 300)AT1G78380| Symbols: GST8, ATGSTU19 | ATGSTU19 (GLUTATHIONE TRANSFERASE 8); glutathione transferase | chr1:29491552-29492712 REVERSEmoderately similar to ( 349)LGUL_SOYBN no original description'
Glyma08g18640.N3	j	PAC:26308848	TSS30413	No	NO Cluster	AT1G78380	'26.9'	'misc.glutathione S transferases'	'moderately similar to ( 300)AT1G78380| Symbols: GST8, ATGSTU19 | ATGSTU19 (GLUTATHIONE TRANSFERASE 8); glutathione transferase | chr1:29491552-29492712 REVERSEmoderately similar to ( 349)LGUL_SOYBN no original description'
Glyma08g18640.N5	j	PAC:26308848	TSS30415	No	NO Cluster	AT1G78380	'26.9'	'misc.glutathione S transferases'	'moderately similar to ( 300)AT1G78380| Symbols: GST8, ATGSTU19 | ATGSTU19 (GLUTATHIONE TRANSFERASE 8); glutathione transferase | chr1:29491552-29492712 REVERSEmoderately similar to ( 349)LGUL_SOYBN no original description'
Glyma08g15480.N2	j	PAC:26310853	TSS30209	No	NO Cluster	AT5G09810	'31.1'	'cell.organisation'	'highly similar to ( 760)AT5G09810| Symbols: ACT2/7, ACT7 | ACT7 (actin 7) | chr5:3052810-3054221 FORWARDhighly similar to ( 760)ACT13_SOLTU no original description'
Glyma08g15480.N3	j	PAC:26310853	TSS30210	No	NO Cluster	AT5G09810	'31.1'	'cell.organisation'	'highly similar to ( 760)AT5G09810| Symbols: ACT2/7, ACT7 | ACT7 (actin 7) | chr5:3052810-3054221 FORWARDhighly similar to ( 760)ACT13_SOLTU no original description'
Glyma08g15480.N4	j	PAC:26310853	TSS30211	No	NO Cluster	AT5G09810	'31.1'	'cell.organisation'	'highly similar to ( 760)AT5G09810| Symbols: ACT2/7, ACT7 | ACT7 (actin 7) | chr5:3052810-3054221 FORWARDhighly similar to ( 760)ACT13_SOLTU no original description'
Glyma08g15480.N6	j	PAC:26310853	TSS30211	No	NO Cluster	AT5G09810	'31.1'	'cell.organisation'	'highly similar to ( 760)AT5G09810| Symbols: ACT2/7, ACT7 | ACT7 (actin 7) | chr5:3052810-3054221 FORWARDhighly similar to ( 760)ACT13_SOLTU no original description'
Glyma08g15480.N5	j	PAC:26310853	TSS30211	No	NO Cluster	AT5G09810	'31.1'	'cell.organisation'	'highly similar to ( 760)AT5G09810| Symbols: ACT2/7, ACT7 | ACT7 (actin 7) | chr5:3052810-3054221 FORWARDhighly similar to ( 760)ACT13_SOLTU no original description'
Glyma08g15480.N8	j	PAC:26310853	TSS30212	No	NO Cluster	AT5G09810	'31.1'	'cell.organisation'	'highly similar to ( 760)AT5G09810| Symbols: ACT2/7, ACT7 | ACT7 (actin 7) | chr5:3052810-3054221 FORWARDhighly similar to ( 760)ACT13_SOLTU no original description'
Glyma08g15480.1	=	PAC:26310853	TSS30212	Yes	26	AT5G09810	'31.1'	'cell.organisation'	'highly similar to ( 760)AT5G09810| Symbols: ACT2/7, ACT7 | ACT7 (actin 7) | chr5:3052810-3054221 FORWARDhighly similar to ( 760)ACT13_SOLTU no original description'
Glyma08g15480.N7	j	PAC:26310853	TSS30212	No	NO Cluster	AT5G09810	'31.1'	'cell.organisation'	'highly similar to ( 760)AT5G09810| Symbols: ACT2/7, ACT7 | ACT7 (actin 7) | chr5:3052810-3054221 FORWARDhighly similar to ( 760)ACT13_SOLTU no original description'
Glyma19g41440.N7	j	PAC:26326522	TSS72961	No	NO Cluster	AT1G56700	'29.5'	'protein.degradation'	'moderately similar to ( 317)AT1G56700| Symbols: | pyrrolidone-carboxylate peptidase family protein | chr1:21260495-21261305 FORWARD no original description'
Glyma19g41440.4	=	PAC:26326521	TSS72963	Yes	48	AT1G56700	'29.5'	'protein.degradation'	'moderately similar to ( 317)AT1G56700| Symbols: | pyrrolidone-carboxylate peptidase family protein | chr1:21260495-21261305 FORWARD no original description'
Glyma19g41440.6	=	PAC:26326523	TSS72962	No	NO Cluster	AT1G56700	'29.5'	'protein.degradation'	'moderately similar to ( 317)AT1G56700| Symbols: | pyrrolidone-carboxylate peptidase family protein | chr1:21260495-21261305 FORWARD no original description'
Glyma19g41440.N9	j	PAC:26326522	TSS72962	No	NO Cluster	AT1G56700	'29.5'	'protein.degradation'	'moderately similar to ( 317)AT1G56700| Symbols: | pyrrolidone-carboxylate peptidase family protein | chr1:21260495-21261305 FORWARD no original description'
Glyma19g41440.N8	j	PAC:26326522	TSS72962	No	NO Cluster	AT1G56700	'29.5'	'protein.degradation'	'moderately similar to ( 317)AT1G56700| Symbols: | pyrrolidone-carboxylate peptidase family protein | chr1:21260495-21261305 FORWARD no original description'
Glyma19g41440.5	=	PAC:26326522	TSS72962	No	NO Cluster	AT1G56700	'29.5'	'protein.degradation'	'moderately similar to ( 317)AT1G56700| Symbols: | pyrrolidone-carboxylate peptidase family protein | chr1:21260495-21261305 FORWARD no original description'
Glyma20g39001.1	=	PAC:26337347	TSS75088	No	NO Cluster	NO MapMan Annotation
Glyma20g39001.N9	x	PAC:26337347	TSS76641	No	NO Cluster	NO MapMan Annotation
Glyma20g39001.N8	x	PAC:26337347	TSS76640	No	NO Cluster	NO MapMan Annotation
Glyma20g39001.N7	j	PAC:26337347	TSS75087	No	NO Cluster	NO MapMan Annotation
Glyma20g39001.N6	j	PAC:26337347	TSS75087	No	NO Cluster	NO MapMan Annotation
Glyma20g39001.N5	j	PAC:26337347	TSS75087	No	NO Cluster	NO MapMan Annotation
Glyma20g39001.N4	j	PAC:26337347	TSS75087	No	NO Cluster	NO MapMan Annotation
Glyma20g39001.N3	j	PAC:26337347	TSS75087	No	NO Cluster	NO MapMan Annotation
Glyma20g39001.N2	j	PAC:26337347	TSS75087	Yes	69	NO MapMan Annotation
Glyma06g12540.N3	j	PAC:26299407	TSS21337	No	NO Cluster	AT5G64030	'20.2.3'	'stress.abiotic.drought/salt'	'highly similar to ( 927)AT5G64030| Symbols: | dehydration-responsive protein-related | chr5:25642191-25645483 FORWARD no original description'
Glyma06g12540.N2	j	PAC:26299407	TSS21336	No	NO Cluster	AT5G64030	'20.2.3'	'stress.abiotic.drought/salt'	'highly similar to ( 927)AT5G64030| Symbols: | dehydration-responsive protein-related | chr5:25642191-25645483 FORWARD no original description'
Glyma06g12540.1	=	PAC:26299407	TSS21337	Yes	27	AT5G64030	'20.2.3'	'stress.abiotic.drought/salt'	'highly similar to ( 927)AT5G64030| Symbols: | dehydration-responsive protein-related | chr5:25642191-25645483 FORWARD no original description'
Glyma06g12540.N5	j	PAC:26299407	TSS21337	No	NO Cluster	AT5G64030	'20.2.3'	'stress.abiotic.drought/salt'	'highly similar to ( 927)AT5G64030| Symbols: | dehydration-responsive protein-related | chr5:25642191-25645483 FORWARD no original description'
Glyma06g12540.N4	j	PAC:26299407	TSS21337	No	NO Cluster	AT5G64030	'20.2.3'	'stress.abiotic.drought/salt'	'highly similar to ( 927)AT5G64030| Symbols: | dehydration-responsive protein-related | chr5:25642191-25645483 FORWARD no original description'
Glyma11g20630.N8	j	PAC:26295725	TSS41182	No	NO Cluster	AT5G60640	'21.1'	'redox.thioredoxin'	'highly similar to ( 647)AT5G60640| Symbols: ATPDIL1-4 | ATPDIL1-4 (PDI-LIKE 1-4); thiol-disulfide exchange intermediate | chr5:24388642-24391219 REVERSEmoderately similar to ( 202)PDI_MAIZE no original description'
Glyma11g20630.N7	j	PAC:26295725	TSS41182	No	NO Cluster	AT5G60640	'21.1'	'redox.thioredoxin'	'highly similar to ( 647)AT5G60640| Symbols: ATPDIL1-4 | ATPDIL1-4 (PDI-LIKE 1-4); thiol-disulfide exchange intermediate | chr5:24388642-24391219 REVERSEmoderately similar to ( 202)PDI_MAIZE no original description'
Glyma11g20630.N10	j	PAC:26295725	TSS41182	No	NO Cluster	AT5G60640	'21.1'	'redox.thioredoxin'	'highly similar to ( 647)AT5G60640| Symbols: ATPDIL1-4 | ATPDIL1-4 (PDI-LIKE 1-4); thiol-disulfide exchange intermediate | chr5:24388642-24391219 REVERSEmoderately similar to ( 202)PDI_MAIZE no original description'
Glyma11g20630.N9	j	PAC:26295725	TSS41182	No	NO Cluster	AT5G60640	'21.1'	'redox.thioredoxin'	'highly similar to ( 647)AT5G60640| Symbols: ATPDIL1-4 | ATPDIL1-4 (PDI-LIKE 1-4); thiol-disulfide exchange intermediate | chr5:24388642-24391219 REVERSEmoderately similar to ( 202)PDI_MAIZE no original description'
Glyma11g20630.1	=	PAC:26295725	TSS41182	Yes	20	AT5G60640	'21.1'	'redox.thioredoxin'	'highly similar to ( 647)AT5G60640| Symbols: ATPDIL1-4 | ATPDIL1-4 (PDI-LIKE 1-4); thiol-disulfide exchange intermediate | chr5:24388642-24391219 REVERSEmoderately similar to ( 202)PDI_MAIZE no original description'
Glyma11g20630.N5	j	PAC:26295725	TSS41182	No	NO Cluster	AT5G60640	'21.1'	'redox.thioredoxin'	'highly similar to ( 647)AT5G60640| Symbols: ATPDIL1-4 | ATPDIL1-4 (PDI-LIKE 1-4); thiol-disulfide exchange intermediate | chr5:24388642-24391219 REVERSEmoderately similar to ( 202)PDI_MAIZE no original description'
Glyma11g20630.N6	j	PAC:26295725	TSS41182	No	NO Cluster	AT5G60640	'21.1'	'redox.thioredoxin'	'highly similar to ( 647)AT5G60640| Symbols: ATPDIL1-4 | ATPDIL1-4 (PDI-LIKE 1-4); thiol-disulfide exchange intermediate | chr5:24388642-24391219 REVERSEmoderately similar to ( 202)PDI_MAIZE no original description'
Glyma11g20630.N2	j	PAC:26295725	TSS41182	No	NO Cluster	AT5G60640	'21.1'	'redox.thioredoxin'	'highly similar to ( 647)AT5G60640| Symbols: ATPDIL1-4 | ATPDIL1-4 (PDI-LIKE 1-4); thiol-disulfide exchange intermediate | chr5:24388642-24391219 REVERSEmoderately similar to ( 202)PDI_MAIZE no original description'
Glyma11g20630.N3	j	PAC:26295725	TSS41182	No	NO Cluster	AT5G60640	'21.1'	'redox.thioredoxin'	'highly similar to ( 647)AT5G60640| Symbols: ATPDIL1-4 | ATPDIL1-4 (PDI-LIKE 1-4); thiol-disulfide exchange intermediate | chr5:24388642-24391219 REVERSEmoderately similar to ( 202)PDI_MAIZE no original description'
Glyma11g20630.N4	j	PAC:26295725	TSS41182	No	NO Cluster	AT5G60640	'21.1'	'redox.thioredoxin'	'highly similar to ( 647)AT5G60640| Symbols: ATPDIL1-4 | ATPDIL1-4 (PDI-LIKE 1-4); thiol-disulfide exchange intermediate | chr5:24388642-24391219 REVERSEmoderately similar to ( 202)PDI_MAIZE no original description'
Glyma07g38690.N4	j	PAC:26349310	TSS26404	No	NO Cluster	AT3G23610	'29.4'	'protein.postranslational modification'	'moderately similar to ( 208)AT3G23610| Symbols: | dual specificity protein phosphatase (DsPTP1) | chr3:8478287-8479648 FORWARDvery weakly similar to (94.7)PTP3_CHLEU no original description'
Glyma07g38690.N5	j	PAC:26349310	TSS26404	No	NO Cluster	AT3G23610	'29.4'	'protein.postranslational modification'	'moderately similar to ( 208)AT3G23610| Symbols: | dual specificity protein phosphatase (DsPTP1) | chr3:8478287-8479648 FORWARDvery weakly similar to (94.7)PTP3_CHLEU no original description'
Glyma07g38690.N6	j	PAC:26349310	TSS26404	No	NO Cluster	AT3G23610	'29.4'	'protein.postranslational modification'	'moderately similar to ( 208)AT3G23610| Symbols: | dual specificity protein phosphatase (DsPTP1) | chr3:8478287-8479648 FORWARDvery weakly similar to (94.7)PTP3_CHLEU no original description'
Glyma07g38690.1	=	PAC:26349310	TSS26404	Yes	42	AT3G23610	'29.4'	'protein.postranslational modification'	'moderately similar to ( 208)AT3G23610| Symbols: | dual specificity protein phosphatase (DsPTP1) | chr3:8478287-8479648 FORWARDvery weakly similar to (94.7)PTP3_CHLEU no original description'
Glyma07g38690.N2	j	PAC:26349310	TSS26404	No	NO Cluster	AT3G23610	'29.4'	'protein.postranslational modification'	'moderately similar to ( 208)AT3G23610| Symbols: | dual specificity protein phosphatase (DsPTP1) | chr3:8478287-8479648 FORWARDvery weakly similar to (94.7)PTP3_CHLEU no original description'
Glyma07g38690.N3	j	PAC:26349310	TSS26404	No	NO Cluster	AT3G23610	'29.4'	'protein.postranslational modification'	'moderately similar to ( 208)AT3G23610| Symbols: | dual specificity protein phosphatase (DsPTP1) | chr3:8478287-8479648 FORWARDvery weakly similar to (94.7)PTP3_CHLEU no original description'
Glyma14g37210.1	=	PAC:26286404	TSS54823	Yes	2	AT5G58770	'16.1.5'	'secondary metabolism.isoprenoids.terpenoids'	'moderately similar to ( 296)AT5G58770| Symbols: | dehydrodolichyl diphosphate synthase, putative / DEDOL-PP synthase, putative | chr5:23751622-23752721 FORWARD no original description'
Glyma14g37210.N2	j	PAC:26286404	TSS54824	No	NO Cluster	AT5G58770	'16.1.5'	'secondary metabolism.isoprenoids.terpenoids'	'moderately similar to ( 296)AT5G58770| Symbols: | dehydrodolichyl diphosphate synthase, putative / DEDOL-PP synthase, putative | chr5:23751622-23752721 FORWARD no original description'
Glyma02g46340.N2	x	PAC:26288430	TSS7356	No	NO Cluster	AT3G20310	'17.5.2'	'hormone metabolism.ethylene.signal transduction'	'very weakly similar to (92.4)AT3G20310| Symbols: ATERF-7, ATERF7, ERF7 | ATERF-7/ATERF7/ERF7 (ETHYLINE RESPONSE FACTOR7); DNA binding / protein binding / transcription factor/ transcription repressor | chr3:7085963-7086697 REVERSEvery weakly similar to (92.4)ERF3_TOBAC no original description'
Glyma02g46340.1	=	PAC:26288430	TSS5279	Yes	73	AT3G20310	'17.5.2'	'hormone metabolism.ethylene.signal transduction'	'very weakly similar to (92.4)AT3G20310| Symbols: ATERF-7, ATERF7, ERF7 | ATERF-7/ATERF7/ERF7 (ETHYLINE RESPONSE FACTOR7); DNA binding / protein binding / transcription factor/ transcription repressor | chr3:7085963-7086697 REVERSEvery weakly similar to (92.4)ERF3_TOBAC no original description'
Glyma03g02940.N3	j	PAC:26335555	TSS7776	Yes	110	AT2G45380	'35.2'	'not assigned.unknown'	'weakly similar to ( 159)AT2G45380| Symbols: | similar to glycine-rich protein [Arabidopsis thaliana] (TAIR:AT4G22740.2); similar to glycine-rich protein [Arabidopsis thaliana] (TAIR:AT4G22740.1); similar to unnamed protein product [Vitis vinifera] (GB:CAO16973.1); similar to Os06g0134900 [Oryza sativa (japonica cultivar-group)] (GB:NP_001056719.1); similar to unnamed protein product [Vitis vinif…
Glyma03g02940.N4	j	PAC:26335555	TSS7776	No	NO Cluster	AT2G45380	'35.2'	'not assigned.unknown'	'weakly similar to ( 159)AT2G45380| Symbols: | similar to glycine-rich protein [Arabidopsis thaliana] (TAIR:AT4G22740.2); similar to glycine-rich protein [Arabidopsis thaliana] (TAIR:AT4G22740.1); similar to unnamed protein product [Vitis vinifera] (GB:CAO16973.1); similar to Os06g0134900 [Oryza sativa (japonica cultivar-group)] (GB:NP_001056719.1); similar to unnamed protein product [Vitis vinif…
Glyma03g02940.N7	j	PAC:26335555	TSS7776	No	NO Cluster	AT2G45380	'35.2'	'not assigned.unknown'	'weakly similar to ( 159)AT2G45380| Symbols: | similar to glycine-rich protein [Arabidopsis thaliana] (TAIR:AT4G22740.2); similar to glycine-rich protein [Arabidopsis thaliana] (TAIR:AT4G22740.1); similar to unnamed protein product [Vitis vinifera] (GB:CAO16973.1); similar to Os06g0134900 [Oryza sativa (japonica cultivar-group)] (GB:NP_001056719.1); similar to unnamed protein product [Vitis vinif…
Glyma03g02940.1	=	PAC:26335554	TSS7776	No	NO Cluster	AT2G45380	'35.2'	'not assigned.unknown'	'weakly similar to ( 159)AT2G45380| Symbols: | similar to glycine-rich protein [Arabidopsis thaliana] (TAIR:AT4G22740.2); similar to glycine-rich protein [Arabidopsis thaliana] (TAIR:AT4G22740.1); similar to unnamed protein product [Vitis vinifera] (GB:CAO16973.1); similar to Os06g0134900 [Oryza sativa (japonica cultivar-group)] (GB:NP_001056719.1); similar to unnamed protein product [Vitis vinif…
Glyma03g02940.N5	j	PAC:26335555	TSS7776	No	NO Cluster	AT2G45380	'35.2'	'not assigned.unknown'	'weakly similar to ( 159)AT2G45380| Symbols: | similar to glycine-rich protein [Arabidopsis thaliana] (TAIR:AT4G22740.2); similar to glycine-rich protein [Arabidopsis thaliana] (TAIR:AT4G22740.1); similar to unnamed protein product [Vitis vinifera] (GB:CAO16973.1); similar to Os06g0134900 [Oryza sativa (japonica cultivar-group)] (GB:NP_001056719.1); similar to unnamed protein product [Vitis vinif…
Glyma03g02940.N6	j	PAC:26335555	TSS7776	No	NO Cluster	AT2G45380	'35.2'	'not assigned.unknown'	'weakly similar to ( 159)AT2G45380| Symbols: | similar to glycine-rich protein [Arabidopsis thaliana] (TAIR:AT4G22740.2); similar to glycine-rich protein [Arabidopsis thaliana] (TAIR:AT4G22740.1); similar to unnamed protein product [Vitis vinifera] (GB:CAO16973.1); similar to Os06g0134900 [Oryza sativa (japonica cultivar-group)] (GB:NP_001056719.1); similar to unnamed protein product [Vitis vinif…
Glyma03g02940.2	=	PAC:26335555	TSS7777	No	NO Cluster	AT2G45380	'35.2'	'not assigned.unknown'	'weakly similar to ( 159)AT2G45380| Symbols: | similar to glycine-rich protein [Arabidopsis thaliana] (TAIR:AT4G22740.2); similar to glycine-rich protein [Arabidopsis thaliana] (TAIR:AT4G22740.1); similar to unnamed protein product [Vitis vinifera] (GB:CAO16973.1); similar to Os06g0134900 [Oryza sativa (japonica cultivar-group)] (GB:NP_001056719.1); similar to unnamed protein product [Vitis vinif…
Glyma17g36570.1	=	PAC:26311072	TSS65455	Yes	35	AT5G42660	'33.99'	'development.unspecified'	'highly similar to ( 526)AT5G42660| Symbols: | similar to unknown protein [Arabidopsis thaliana] (TAIR:AT2G02910.1); similar to unnamed protein product [Vitis vinifera] (GB:CAO61237.1); contains InterPro domain Protein of unknown function DUF616 (InterPro:IPR006852) | chr5:17120290-17123013 REVERSE no original description'
Glyma17g36570.N4	j	PAC:26311072	TSS65455	No	NO Cluster	AT5G42660	'33.99'	'development.unspecified'	'highly similar to ( 526)AT5G42660| Symbols: | similar to unknown protein [Arabidopsis thaliana] (TAIR:AT2G02910.1); similar to unnamed protein product [Vitis vinifera] (GB:CAO61237.1); contains InterPro domain Protein of unknown function DUF616 (InterPro:IPR006852) | chr5:17120290-17123013 REVERSE no original description'
Glyma17g36570.N3	j	PAC:26311072	TSS65455	No	NO Cluster	AT5G42660	'33.99'	'development.unspecified'	'highly similar to ( 526)AT5G42660| Symbols: | similar to unknown protein [Arabidopsis thaliana] (TAIR:AT2G02910.1); similar to unnamed protein product [Vitis vinifera] (GB:CAO61237.1); contains InterPro domain Protein of unknown function DUF616 (InterPro:IPR006852) | chr5:17120290-17123013 REVERSE no original description'
Glyma17g36570.N2	j	PAC:26311072	TSS65455	No	NO Cluster	AT5G42660	'33.99'	'development.unspecified'	'highly similar to ( 526)AT5G42660| Symbols: | similar to unknown protein [Arabidopsis thaliana] (TAIR:AT2G02910.1); similar to unnamed protein product [Vitis vinifera] (GB:CAO61237.1); contains InterPro domain Protein of unknown function DUF616 (InterPro:IPR006852) | chr5:17120290-17123013 REVERSE no original description'
Glyma06g25331.1	=	PAC:26300222	TSS22040	No	NO Cluster	NO MapMan Annotation
Glyma06g25331.N5	j	PAC:26300222	TSS22039	No	NO Cluster	NO MapMan Annotation
Glyma06g25331.N6	j	PAC:26300222	TSS22039	Yes	62	NO MapMan Annotation
Glyma06g25331.N3	j	PAC:26300222	TSS22039	No	NO Cluster	NO MapMan Annotation
Glyma06g25331.N4	j	PAC:26300222	TSS22039	No	NO Cluster	NO MapMan Annotation
Glyma06g25331.N2	j	PAC:26300222	TSS22039	No	NO Cluster	NO MapMan Annotation
Glyma07g06440.2	=	PAC:26349843	TSS25093	No	NO Cluster	AT3G25500	'31.1'	'cell.organisation'	'highly similar to ( 573)AT3G25500| Symbols: FH1, AHF1, AFH1 | AFH1 (FORMIN HOMOLOGY 1); actin binding | chr3:9252557-9256063 REVERSE no original description'
Glyma07g06440.N3	j	PAC:26349843	TSS25093	Yes	45	AT3G25500	'31.1'	'cell.organisation'	'highly similar to ( 573)AT3G25500| Symbols: FH1, AHF1, AFH1 | AFH1 (FORMIN HOMOLOGY 1); actin binding | chr3:9252557-9256063 REVERSE no original description'
Glyma07g11300.N2	j	PAC:26347712	TSS23486	No	NO Cluster	AT3G18050	'35.2'	'not assigned.unknown'	'moderately similar to ( 299)AT3G18050| Symbols: | similar to unknown protein [Arabidopsis thaliana] (TAIR:AT4G28100.1); similar to unknown [Populus trichocarpa] (GB:ABK95654.1) | chr3:6180937-6182599 FORWARD no original description'
Glyma07g11300.1	=	PAC:26347712	TSS23486	Yes	21	AT3G18050	'35.2'	'not assigned.unknown'	'moderately similar to ( 299)AT3G18050| Symbols: | similar to unknown protein [Arabidopsis thaliana] (TAIR:AT4G28100.1); similar to unknown [Populus trichocarpa] (GB:ABK95654.1) | chr3:6180937-6182599 FORWARD no original description'
Glyma10g32610.2	=	PAC:26346845	TSS38996	Yes	3	AT4G14330	'31.1'	'cell.organisation'	'highly similar to ( 668)AT4G14330| Symbols: | phragmoplast-associated kinesin-related protein 2 (PAKRP2) | chr4:8244224-8247282 FORWARDvery weakly similar to (96.7)K125_TOBAC no original description'
Glyma10g32610.N4	j	PAC:26346844	TSS38996	No	NO Cluster	AT4G14330	'31.1'	'cell.organisation'	'highly similar to ( 668)AT4G14330| Symbols: | phragmoplast-associated kinesin-related protein 2 (PAKRP2) | chr4:8244224-8247282 FORWARDvery weakly similar to (96.7)K125_TOBAC no original description'
Glyma10g32610.1	=	PAC:26346844	TSS38996	No	NO Cluster	AT4G14330	'31.1'	'cell.organisation'	'highly similar to ( 668)AT4G14330| Symbols: | phragmoplast-associated kinesin-related protein 2 (PAKRP2) | chr4:8244224-8247282 FORWARDvery weakly similar to (96.7)K125_TOBAC no original description'
Glyma10g32610.N3	j	PAC:26346844	TSS38996	No	NO Cluster	AT4G14330	'31.1'	'cell.organisation'	'highly similar to ( 668)AT4G14330| Symbols: | phragmoplast-associated kinesin-related protein 2 (PAKRP2) | chr4:8244224-8247282 FORWARDvery weakly similar to (96.7)K125_TOBAC no original description'
Glyma14g07230.N5	j	PAC:26285253	TSS53993	No	NO Cluster	AT1G13980	'33.99'	'development.unspecified'	'nearly identical (2084)AT1G13980| Symbols: VAN7, EMB30, GN | GN (GNOM) | chr1:4789584-4794394 FORWARD no original description'
Glyma14g07230.N4	j	PAC:26285253	TSS53992	Yes	35	AT1G13980	'33.99'	'development.unspecified'	'nearly identical (2084)AT1G13980| Symbols: VAN7, EMB30, GN | GN (GNOM) | chr1:4789584-4794394 FORWARD no original description'
Glyma14g07230.2	=	PAC:26285253	TSS53992	No	NO Cluster	AT1G13980	'33.99'	'development.unspecified'	'nearly identical (2084)AT1G13980| Symbols: VAN7, EMB30, GN | GN (GNOM) | chr1:4789584-4794394 FORWARD no original description'
Glyma14g07230.3	=	PAC:26285254	TSS53993	No	NO Cluster	AT1G13980	'33.99'	'development.unspecified'	'nearly identical (2084)AT1G13980| Symbols: VAN7, EMB30, GN | GN (GNOM) | chr1:4789584-4794394 FORWARD no original description'
Glyma01g31940.4	=	PAC:26325691	TSS2454	No	NO Cluster	AT2G38460	'34.12'	'transport.metal'	'highly similar to ( 530)AT2G38460| Symbols: | iron transporter-related | chr2:16110681-16113008 FORWARD no original description'
Glyma01g31940.3	=	PAC:26325690	TSS2454	Yes	46	AT2G38460	'34.12'	'transport.metal'	'highly similar to ( 530)AT2G38460| Symbols: | iron transporter-related | chr2:16110681-16113008 FORWARD no original description'
Glyma01g31940.5	=	PAC:26325692	TSS2454	No	NO Cluster	AT2G38460	'34.12'	'transport.metal'	'highly similar to ( 530)AT2G38460| Symbols: | iron transporter-related | chr2:16110681-16113008 FORWARD no original description'
Glyma01g31940.N7	j	PAC:26325689	TSS2454	No	NO Cluster	AT2G38460	'34.12'	'transport.metal'	'highly similar to ( 530)AT2G38460| Symbols: | iron transporter-related | chr2:16110681-16113008 FORWARD no original description'
Glyma01g31940.N6	s	PAC:26325689	TSS849	No	NO Cluster	AT2G38460	'34.12'	'transport.metal'	'highly similar to ( 530)AT2G38460| Symbols: | iron transporter-related | chr2:16110681-16113008 FORWARD no original description'
Glyma01g31940.2	=	PAC:26325689	TSS2454	No	NO Cluster	AT2G38460	'34.12'	'transport.metal'	'highly similar to ( 530)AT2G38460| Symbols: | iron transporter-related | chr2:16110681-16113008 FORWARD no original description'
Glyma01g31940.N8	j	PAC:26325689	TSS2454	No	NO Cluster	AT2G38460	'34.12'	'transport.metal'	'highly similar to ( 530)AT2G38460| Symbols: | iron transporter-related | chr2:16110681-16113008 FORWARD no original description'
Glyma10g28450.N5	j	PAC:26344183	TSS38725	No	NO Cluster	AT5G61190	'27.3.99'	'RNA.regulation of transcription.unclassified'	'moderately similar to ( 261)AT5G61190| Symbols: | zinc finger protein-related | chr5:24632706-24637112 FORWARD no original description'
Glyma10g28450.N4	j	PAC:26344183	TSS38725	No	NO Cluster	AT5G61190	'27.3.99'	'RNA.regulation of transcription.unclassified'	'moderately similar to ( 261)AT5G61190| Symbols: | zinc finger protein-related | chr5:24632706-24637112 FORWARD no original description'
Glyma10g28450.1	=	PAC:26344183	TSS38725	Yes	74	AT5G61190	'27.3.99'	'RNA.regulation of transcription.unclassified'	'moderately similar to ( 261)AT5G61190| Symbols: | zinc finger protein-related | chr5:24632706-24637112 FORWARD no original description'
Glyma10g28450.N3	j	PAC:26344183	TSS38724	No	NO Cluster	AT5G61190	'27.3.99'	'RNA.regulation of transcription.unclassified'	'moderately similar to ( 261)AT5G61190| Symbols: | zinc finger protein-related | chr5:24632706-24637112 FORWARD no original description'
Glyma10g28450.N2	s	PAC:26344183	TSS36668	No	NO Cluster	AT5G61190	'27.3.99'	'RNA.regulation of transcription.unclassified'	'moderately similar to ( 261)AT5G61190| Symbols: | zinc finger protein-related | chr5:24632706-24637112 FORWARD no original description'
Glyma15g02680.N8	j	PAC:26330005	TSS55296	No	NO Cluster	AT3G13690	'29.4.1.57'	'protein.postranslational modification.kinase.receptor like cytoplasmatic kinase VII'	'nearly identical (1011)AT3G13690| Symbols: | protein kinase family protein | chr3:4486927-4490018 FORWARDmoderately similar to ( 228)NORK_PEA no original description'
Glyma15g02680.N7	j	PAC:26330005	TSS55296	No	NO Cluster	AT3G13690	'29.4.1.57'	'protein.postranslational modification.kinase.receptor like cytoplasmatic kinase VII'	'nearly identical (1011)AT3G13690| Symbols: | protein kinase family protein | chr3:4486927-4490018 FORWARDmoderately similar to ( 228)NORK_PEA no original description'
Glyma15g02680.N9	j	PAC:26330005	TSS55297	No	NO Cluster	AT3G13690	'29.4.1.57'	'protein.postranslational modification.kinase.receptor like cytoplasmatic kinase VII'	'nearly identical (1011)AT3G13690| Symbols: | protein kinase family protein | chr3:4486927-4490018 FORWARDmoderately similar to ( 228)NORK_PEA no original description'
Glyma15g02680.2	=	PAC:26330005	TSS55296	Yes	30	AT3G13690	'29.4.1.57'	'protein.postranslational modification.kinase.receptor like cytoplasmatic kinase VII'	'nearly identical (1011)AT3G13690| Symbols: | protein kinase family protein | chr3:4486927-4490018 FORWARDmoderately similar to ( 228)NORK_PEA no original description'
Glyma15g02680.N4	j	PAC:26330005	TSS55295	No	NO Cluster	AT3G13690	'29.4.1.57'	'protein.postranslational modification.kinase.receptor like cytoplasmatic kinase VII'	'nearly identical (1011)AT3G13690| Symbols: | protein kinase family protein | chr3:4486927-4490018 FORWARDmoderately similar to ( 228)NORK_PEA no original description'
Glyma15g02680.N3	j	PAC:26330005	TSS55294	No	NO Cluster	AT3G13690	'29.4.1.57'	'protein.postranslational modification.kinase.receptor like cytoplasmatic kinase VII'	'nearly identical (1011)AT3G13690| Symbols: | protein kinase family protein | chr3:4486927-4490018 FORWARDmoderately similar to ( 228)NORK_PEA no original description'
Glyma15g02680.N6	j	PAC:26330005	TSS55296	No	NO Cluster	AT3G13690	'29.4.1.57'	'protein.postranslational modification.kinase.receptor like cytoplasmatic kinase VII'	'nearly identical (1011)AT3G13690| Symbols: | protein kinase family protein | chr3:4486927-4490018 FORWARDmoderately similar to ( 228)NORK_PEA no original description'
Glyma15g02680.N5	j	PAC:26330005	TSS55296	No	NO Cluster	AT3G13690	'29.4.1.57'	'protein.postranslational modification.kinase.receptor like cytoplasmatic kinase VII'	'nearly identical (1011)AT3G13690| Symbols: | protein kinase family protein | chr3:4486927-4490018 FORWARDmoderately similar to ( 228)NORK_PEA no original description'
Glyma15g02680.N10	j	PAC:26330005	TSS55298	No	NO Cluster	AT3G13690	'29.4.1.57'	'protein.postranslational modification.kinase.receptor like cytoplasmatic kinase VII'	'nearly identical (1011)AT3G13690| Symbols: | protein kinase family protein | chr3:4486927-4490018 FORWARDmoderately similar to ( 228)NORK_PEA no original description'
Glyma13g32242.N2	j	PAC:26318798	TSS48548	No	NO Cluster	NO MapMan Annotation
Glyma13g32242.N3	j	PAC:26318798	TSS48548	No	NO Cluster	NO MapMan Annotation
Glyma13g32242.N4	j	PAC:26318798	TSS48548	No	NO Cluster	NO MapMan Annotation
Glyma13g32242.N5	j	PAC:26318798	TSS48548	No	NO Cluster	NO MapMan Annotation
Glyma13g32242.N6	j	PAC:26318798	TSS48548	No	NO Cluster	NO MapMan Annotation
Glyma13g32242.1	=	PAC:26318798	TSS48548	Yes	45	NO MapMan Annotation
Glyma12g04770.N2	o	PAC:26293149	TSS45543	No	NO Cluster	No Arabidopsis Homolohue	'35.2'	'not assigned.unknown'	'no original description'
Glyma12g04770.1	=	PAC:26293149	TSS45542	Yes	101	No Arabidopsis Homolohue	'35.2'	'not assigned.unknown'	'no original description'
Glyma19g01860.1	=	PAC:26327116	TSS69774	No	NO Cluster	No Arabidopsis Homolohue	'35.2'	'not assigned.unknown'	'no original description'
Glyma19g01860.N2	j	PAC:26327116	TSS69773	Yes	50	No Arabidopsis Homolohue	'35.2'	'not assigned.unknown'	'no original description'
Glyma09g31560.3	=	PAC:26340800	TSS34897	No	NO Cluster	AT3G02560	'29.2.1.2.1.7'	'protein.synthesis.ribosomal protein.eukaryotic.40S subunit.S7'	'moderately similar to ( 286)AT3G02560| Symbols: | 40S ribosomal protein S7 (RPS7B) | chr3:542348-543175 FORWARDmoderately similar to ( 292)RS7_SECCE no original description'
Glyma09g31560.4	=	PAC:26340801	TSS34897	Yes	67	AT3G02560	'29.2.1.2.1.7'	'protein.synthesis.ribosomal protein.eukaryotic.40S subunit.S7'	'moderately similar to ( 286)AT3G02560| Symbols: | 40S ribosomal protein S7 (RPS7B) | chr3:542348-543175 FORWARDmoderately similar to ( 292)RS7_SECCE no original description'
Glyma03g38540.N2	j	PAC:26335303	TSS10889	No	NO Cluster	No Arabidopsis Homolohue	'35.2'	'not assigned.unknown'	'no original description'
Glyma03g38540.1	=	PAC:26335303	TSS10889	Yes	67	No Arabidopsis Homolohue	'35.2'	'not assigned.unknown'	'no original description'
Glyma02g26791.1	=	PAC:26287432	TSS6518	Yes	69	NO MapMan Annotation
Glyma02g26791.2	=	PAC:26287433	TSS6518	No	NO Cluster	NO MapMan Annotation
Glyma02g17130.N15	j	PAC:26289059	TSS4355	No	NO Cluster	AT2G47940	'29.5.5'	'protein.degradation.serine protease'	'highly similar to ( 772)AT2G47940| Symbols: DEGP2 | DEGP2 (DEGP PROTEASE 2) | chr2:19625442-19629234 REVERSE no original description'
Glyma02g17130.N5	j	PAC:26289059	TSS4355	No	NO Cluster	AT2G47940	'29.5.5'	'protein.degradation.serine protease'	'highly similar to ( 772)AT2G47940| Symbols: DEGP2 | DEGP2 (DEGP PROTEASE 2) | chr2:19625442-19629234 REVERSE no original description'
Glyma02g17130.N4	j	PAC:26289059	TSS4355	No	NO Cluster	AT2G47940	'29.5.5'	'protein.degradation.serine protease'	'highly similar to ( 772)AT2G47940| Symbols: DEGP2 | DEGP2 (DEGP PROTEASE 2) | chr2:19625442-19629234 REVERSE no original description'
Glyma02g17130.N3	j	PAC:26289059	TSS4355	No	NO Cluster	AT2G47940	'29.5.5'	'protein.degradation.serine protease'	'highly similar to ( 772)AT2G47940| Symbols: DEGP2 | DEGP2 (DEGP PROTEASE 2) | chr2:19625442-19629234 REVERSE no original description'
Glyma02g17130.N7	j	PAC:26289059	TSS4355	No	NO Cluster	AT2G47940	'29.5.5'	'protein.degradation.serine protease'	'highly similar to ( 772)AT2G47940| Symbols: DEGP2 | DEGP2 (DEGP PROTEASE 2) | chr2:19625442-19629234 REVERSE no original description'
Glyma02g17130.N6	j	PAC:26289059	TSS4355	No	NO Cluster	AT2G47940	'29.5.5'	'protein.degradation.serine protease'	'highly similar to ( 772)AT2G47940| Symbols: DEGP2 | DEGP2 (DEGP PROTEASE 2) | chr2:19625442-19629234 REVERSE no original description'
Glyma02g17130.2	=	PAC:26289059	TSS4355	Yes	55	AT2G47940	'29.5.5'	'protein.degradation.serine protease'	'highly similar to ( 772)AT2G47940| Symbols: DEGP2 | DEGP2 (DEGP PROTEASE 2) | chr2:19625442-19629234 REVERSE no original description'
Glyma02g17130.N14	j	PAC:26289059	TSS4355	No	NO Cluster	AT2G47940	'29.5.5'	'protein.degradation.serine protease'	'highly similar to ( 772)AT2G47940| Symbols: DEGP2 | DEGP2 (DEGP PROTEASE 2) | chr2:19625442-19629234 REVERSE no original description'
Glyma02g17130.N13	j	PAC:26289059	TSS4355	No	NO Cluster	AT2G47940	'29.5.5'	'protein.degradation.serine protease'	'highly similar to ( 772)AT2G47940| Symbols: DEGP2 | DEGP2 (DEGP PROTEASE 2) | chr2:19625442-19629234 REVERSE no original description'
Glyma02g17130.N12	j	PAC:26289059	TSS4355	No	NO Cluster	AT2G47940	'29.5.5'	'protein.degradation.serine protease'	'highly similar to ( 772)AT2G47940| Symbols: DEGP2 | DEGP2 (DEGP PROTEASE 2) | chr2:19625442-19629234 REVERSE no original description'
Glyma02g17130.N11	j	PAC:26289059	TSS4355	No	NO Cluster	AT2G47940	'29.5.5'	'protein.degradation.serine protease'	'highly similar to ( 772)AT2G47940| Symbols: DEGP2 | DEGP2 (DEGP PROTEASE 2) | chr2:19625442-19629234 REVERSE no original description'
Glyma02g17130.N10	j	PAC:26289059	TSS4355	No	NO Cluster	AT2G47940	'29.5.5'	'protein.degradation.serine protease'	'highly similar to ( 772)AT2G47940| Symbols: DEGP2 | DEGP2 (DEGP PROTEASE 2) | chr2:19625442-19629234 REVERSE no original description'
Glyma02g17130.N9	j	PAC:26289059	TSS4355	No	NO Cluster	AT2G47940	'29.5.5'	'protein.degradation.serine protease'	'highly similar to ( 772)AT2G47940| Symbols: DEGP2 | DEGP2 (DEGP PROTEASE 2) | chr2:19625442-19629234 REVERSE no original description'
Glyma02g17130.N8	j	PAC:26289059	TSS4355	No	NO Cluster	AT2G47940	'29.5.5'	'protein.degradation.serine protease'	'highly similar to ( 772)AT2G47940| Symbols: DEGP2 | DEGP2 (DEGP PROTEASE 2) | chr2:19625442-19629234 REVERSE no original description'
Glyma05g33170.N2	j	PAC:26322749	TSS17846	No	NO Cluster	AT1G10940	'29.4'	'protein.postranslational modification'	'highly similar to ( 580)AT1G10940| Symbols: ASK1, SNRK2-4, SNRK2.4, SRK2A | ASK1 (ARABIDOPSIS SERINE/THREONINE KINASE 1); kinase | chr1:3656050-3658170 REVERSEhighly similar to ( 577)SAPK7_ORYSA no original description'
Glyma05g33170.N4	j	PAC:26322749	TSS17846	No	NO Cluster	AT1G10940	'29.4'	'protein.postranslational modification'	'highly similar to ( 580)AT1G10940| Symbols: ASK1, SNRK2-4, SNRK2.4, SRK2A | ASK1 (ARABIDOPSIS SERINE/THREONINE KINASE 1); kinase | chr1:3656050-3658170 REVERSEhighly similar to ( 577)SAPK7_ORYSA no original description'
Glyma05g33170.1	=	PAC:26322749	TSS17846	Yes	33	AT1G10940	'29.4'	'protein.postranslational modification'	'highly similar to ( 580)AT1G10940| Symbols: ASK1, SNRK2-4, SNRK2.4, SRK2A | ASK1 (ARABIDOPSIS SERINE/THREONINE KINASE 1); kinase | chr1:3656050-3658170 REVERSEhighly similar to ( 577)SAPK7_ORYSA no original description'
Glyma05g33170.N5	j	PAC:26322749	TSS17846	No	NO Cluster	AT1G10940	'29.4'	'protein.postranslational modification'	'highly similar to ( 580)AT1G10940| Symbols: ASK1, SNRK2-4, SNRK2.4, SRK2A | ASK1 (ARABIDOPSIS SERINE/THREONINE KINASE 1); kinase | chr1:3656050-3658170 REVERSEhighly similar to ( 577)SAPK7_ORYSA no original description'
Glyma02g11390.1	=	PAC:26289338	TSS6067	Yes	66	AT5G20935	'35.2'	'not assigned.unknown'	'weakly similar to ( 123)AT5G20935| Symbols: | similar to unnamed protein product [Vitis vinifera] (GB:CAO67410.1) | chr5:7103489-7103947 FORWARD no original description'
Glyma02g11390.3	=	PAC:26289340	TSS6067	No	NO Cluster	AT5G20935	'35.2'	'not assigned.unknown'	'weakly similar to ( 123)AT5G20935| Symbols: | similar to unnamed protein product [Vitis vinifera] (GB:CAO67410.1) | chr5:7103489-7103947 FORWARD no original description'
Glyma02g11390.2	=	PAC:26289339	TSS6067	No	NO Cluster	AT5G20935	'35.2'	'not assigned.unknown'	'weakly similar to ( 123)AT5G20935| Symbols: | similar to unnamed protein product [Vitis vinifera] (GB:CAO67410.1) | chr5:7103489-7103947 FORWARD no original description'
Glyma15g42150.1	=	PAC:26331979	TSS58727	Yes	12	AT3G04770	'29.2.1.2.1.31'	'protein.synthesis.ribosomal protein.eukaryotic.40S subunit.SA'	'moderately similar to ( 383)AT3G04770| Symbols: RPSAB | RPSAB (40S RIBOSOMAL PROTEIN SA B); structural constituent of ribosome | chr3:1309550-1310852 REVERSEmoderately similar to ( 433)RSSA_CICAR no original description'
Glyma15g42150.N3	j	PAC:26331979	TSS58727	No	NO Cluster	AT3G04770	'29.2.1.2.1.31'	'protein.synthesis.ribosomal protein.eukaryotic.40S subunit.SA'	'moderately similar to ( 383)AT3G04770| Symbols: RPSAB | RPSAB (40S RIBOSOMAL PROTEIN SA B); structural constituent of ribosome | chr3:1309550-1310852 REVERSEmoderately similar to ( 433)RSSA_CICAR no original description'
Glyma15g42150.N2	j	PAC:26331979	TSS58727	No	NO Cluster	AT3G04770	'29.2.1.2.1.31'	'protein.synthesis.ribosomal protein.eukaryotic.40S subunit.SA'	'moderately similar to ( 383)AT3G04770| Symbols: RPSAB | RPSAB (40S RIBOSOMAL PROTEIN SA B); structural constituent of ribosome | chr3:1309550-1310852 REVERSEmoderately similar to ( 433)RSSA_CICAR no original description'
Glyma15g42405.N3	j	PAC:26330999	TSS56974	No	NO Cluster	NO MapMan Annotation
Glyma15g42405.N2	j	PAC:26330999	TSS56974	No	NO Cluster	NO MapMan Annotation
Glyma15g42405.1	=	PAC:26330999	TSS56974	Yes	25	NO MapMan Annotation
Glyma04g42840.N5	j	PAC:26304994	TSS14634	No	NO Cluster	AT1G44446	'19.16'	'tetrapyrrole synthesis.chlorophyll b synthase'	'highly similar to ( 783)AT1G44446| Symbols: ATCAO, CAO, CH1 | CH1 (CHLOROPHYLL B BIOSYNTHESIS); chlorophyllide a oxygenase | chr1:16851572-16853592 REVERSEhighly similar to ( 765)CAO_ORYSA no original description'
Glyma04g42840.N4	j	PAC:26304994	TSS14635	No	NO Cluster	AT1G44446	'19.16'	'tetrapyrrole synthesis.chlorophyll b synthase'	'highly similar to ( 783)AT1G44446| Symbols: ATCAO, CAO, CH1 | CH1 (CHLOROPHYLL B BIOSYNTHESIS); chlorophyllide a oxygenase | chr1:16851572-16853592 REVERSEhighly similar to ( 765)CAO_ORYSA no original description'
Glyma04g42840.N3	j	PAC:26304994	TSS14635	No	NO Cluster	AT1G44446	'19.16'	'tetrapyrrole synthesis.chlorophyll b synthase'	'highly similar to ( 783)AT1G44446| Symbols: ATCAO, CAO, CH1 | CH1 (CHLOROPHYLL B BIOSYNTHESIS); chlorophyllide a oxygenase | chr1:16851572-16853592 REVERSEhighly similar to ( 765)CAO_ORYSA no original description'
Glyma04g42840.1	=	PAC:26304994	TSS14634	Yes	101	AT1G44446	'19.16'	'tetrapyrrole synthesis.chlorophyll b synthase'	'highly similar to ( 783)AT1G44446| Symbols: ATCAO, CAO, CH1 | CH1 (CHLOROPHYLL B BIOSYNTHESIS); chlorophyllide a oxygenase | chr1:16851572-16853592 REVERSEhighly similar to ( 765)CAO_ORYSA no original description'
Glyma04g42840.N2	j	PAC:26304994	TSS14634	No	NO Cluster	AT1G44446	'19.16'	'tetrapyrrole synthesis.chlorophyll b synthase'	'highly similar to ( 783)AT1G44446| Symbols: ATCAO, CAO, CH1 | CH1 (CHLOROPHYLL B BIOSYNTHESIS); chlorophyllide a oxygenase | chr1:16851572-16853592 REVERSEhighly similar to ( 765)CAO_ORYSA no original description'
Glyma02g16840.N2	j	PAC:26288849	TSS6378	No	NO Cluster	AT3G06190	'29.5.11.4.5.2'	'protein.degradation.ubiquitin.E3.BTB/POZ Cullin3.BTB/POZ'	'highly similar to ( 623)AT3G06190| Symbols: ATBPM2 | ATBPM2; protein binding | chr3:1874583-1876581 REVERSE no original description'
Glyma02g16840.N3	j	PAC:26288849	TSS6379	No	NO Cluster	AT3G06190	'29.5.11.4.5.2'	'protein.degradation.ubiquitin.E3.BTB/POZ Cullin3.BTB/POZ'	'highly similar to ( 623)AT3G06190| Symbols: ATBPM2 | ATBPM2; protein binding | chr3:1874583-1876581 REVERSE no original description'
Glyma02g16840.1	=	PAC:26288849	TSS6378	Yes	64	AT3G06190	'29.5.11.4.5.2'	'protein.degradation.ubiquitin.E3.BTB/POZ Cullin3.BTB/POZ'	'highly similar to ( 623)AT3G06190| Symbols: ATBPM2 | ATBPM2; protein binding | chr3:1874583-1876581 REVERSE no original description'
Glyma05g08990.N3	j	PAC:26319547	TSS16979	No	NO Cluster	AT5G19130	'29.4'	'protein.postranslational modification'	'highly similar to ( 743)AT5G19130| Symbols: | GPI transamidase component family protein / Gaa1-like family protein | chr5:6416130-6418995 REVERSE no original description'
Glyma05g08990.N4	j	PAC:26319547	TSS16979	No	NO Cluster	AT5G19130	'29.4'	'protein.postranslational modification'	'highly similar to ( 743)AT5G19130| Symbols: | GPI transamidase component family protein / Gaa1-like family protein | chr5:6416130-6418995 REVERSE no original description'
Glyma05g08990.1	=	PAC:26319547	TSS16979	Yes	25	AT5G19130	'29.4'	'protein.postranslational modification'	'highly similar to ( 743)AT5G19130| Symbols: | GPI transamidase component family protein / Gaa1-like family protein | chr5:6416130-6418995 REVERSE no original description'
Glyma05g08990.N7	j	PAC:26319547	TSS16979	No	NO Cluster	AT5G19130	'29.4'	'protein.postranslational modification'	'highly similar to ( 743)AT5G19130| Symbols: | GPI transamidase component family protein / Gaa1-like family protein | chr5:6416130-6418995 REVERSE no original description'
Glyma05g08990.2	=	PAC:26319546	TSS16979	No	NO Cluster	AT5G19130	'29.4'	'protein.postranslational modification'	'highly similar to ( 743)AT5G19130| Symbols: | GPI transamidase component family protein / Gaa1-like family protein | chr5:6416130-6418995 REVERSE no original description'
Glyma05g08990.N5	j	PAC:26319547	TSS16979	No	NO Cluster	AT5G19130	'29.4'	'protein.postranslational modification'	'highly similar to ( 743)AT5G19130| Symbols: | GPI transamidase component family protein / Gaa1-like family protein | chr5:6416130-6418995 REVERSE no original description'
Glyma05g08990.N6	j	PAC:26319547	TSS16979	No	NO Cluster	AT5G19130	'29.4'	'protein.postranslational modification'	'highly similar to ( 743)AT5G19130| Symbols: | GPI transamidase component family protein / Gaa1-like family protein | chr5:6416130-6418995 REVERSE no original description'
Glyma05g08990.N8	j	PAC:26319547	TSS16979	No	NO Cluster	AT5G19130	'29.4'	'protein.postranslational modification'	'highly similar to ( 743)AT5G19130| Symbols: | GPI transamidase component family protein / Gaa1-like family protein | chr5:6416130-6418995 REVERSE no original description'
Glyma07g09070.N6	j	PAC:26349107	TSS25251	No	NO Cluster	AT3G61050	'30.3'	'signalling.calcium'	'highly similar to ( 632)AT3G61050| Symbols: NTMC2TYPE4, NTMC2T4 | NTMC2T4/NTMC2TYPE4; lipid binding | chr3:22608460-22611907 FORWARD no original description'
Glyma07g09070.1	=	PAC:26349107	TSS25251	Yes	21	AT3G61050	'30.3'	'signalling.calcium'	'highly similar to ( 632)AT3G61050| Symbols: NTMC2TYPE4, NTMC2T4 | NTMC2T4/NTMC2TYPE4; lipid binding | chr3:22608460-22611907 FORWARD no original description'
Glyma07g09070.N4	j	PAC:26349107	TSS25251	No	NO Cluster	AT3G61050	'30.3'	'signalling.calcium'	'highly similar to ( 632)AT3G61050| Symbols: NTMC2TYPE4, NTMC2T4 | NTMC2T4/NTMC2TYPE4; lipid binding | chr3:22608460-22611907 FORWARD no original description'
Glyma07g09070.N2	j	PAC:26349107	TSS25251	No	NO Cluster	AT3G61050	'30.3'	'signalling.calcium'	'highly similar to ( 632)AT3G61050| Symbols: NTMC2TYPE4, NTMC2T4 | NTMC2T4/NTMC2TYPE4; lipid binding | chr3:22608460-22611907 FORWARD no original description'
Glyma07g09070.N3	j	PAC:26349107	TSS25251	No	NO Cluster	AT3G61050	'30.3'	'signalling.calcium'	'highly similar to ( 632)AT3G61050| Symbols: NTMC2TYPE4, NTMC2T4 | NTMC2T4/NTMC2TYPE4; lipid binding | chr3:22608460-22611907 FORWARD no original description'
Glyma07g09070.N7	j	PAC:26349107	TSS25251	No	NO Cluster	AT3G61050	'30.3'	'signalling.calcium'	'highly similar to ( 632)AT3G61050| Symbols: NTMC2TYPE4, NTMC2T4 | NTMC2T4/NTMC2TYPE4; lipid binding | chr3:22608460-22611907 FORWARD no original description'
Glyma12g04160.1	=	PAC:26293338	TSS45511	Yes	29	AT5G50280	'27.3'	'RNA.regulation of transcription'	'highly similar to ( 792)AT5G50280| Symbols: EMB1006 | EMB1006 (EMBRYO DEFECTIVE 1006) | chr5:20476464-20478730 FORWARDweakly similar to ( 176)RF1_ORYSA no original description'	'33.99'	'development.unspecified'	'glyma12g04160'	'highly similar to ( 792)AT5G50280| Symbols: EMB1006 | EMB1006 (EMBRYO DEFECTIVE 1006) | chr5:20476464-20478730 FORWARDweakly similar to ( 176)RF1_ORYSA no original description'
Glyma12g04160.N2	j	PAC:26293338	TSS45511	No	NO Cluster	AT5G50280	'27.3'	'RNA.regulation of transcription'	'highly similar to ( 792)AT5G50280| Symbols: EMB1006 | EMB1006 (EMBRYO DEFECTIVE 1006) | chr5:20476464-20478730 FORWARDweakly similar to ( 176)RF1_ORYSA no original description'	'33.99'	'development.unspecified'	'glyma12g04160'	'highly similar to ( 792)AT5G50280| Symbols: EMB1006 | EMB1006 (EMBRYO DEFECTIVE 1006) | chr5:20476464-20478730 FORWARDweakly similar to ( 176)RF1_ORYSA no original description'
Glyma11g09510.N3	x	PAC:26296717	TSS40542	No	NO Cluster	AT4G19180	'23.2'	'nucleotide metabolism.degradation'	'highly similar to ( 682)AT4G19180| Symbols: | nucleoside phosphatase family protein / GDA1/CD39 family protein | chr4:10485529-10487879 REVERSEvery weakly similar to (83.6)APY_SOLTU no original description'
Glyma11g09510.2	=	PAC:26296717	TSS42377	Yes	26	AT4G19180	'23.2'	'nucleotide metabolism.degradation'	'highly similar to ( 682)AT4G19180| Symbols: | nucleoside phosphatase family protein / GDA1/CD39 family protein | chr4:10485529-10487879 REVERSEvery weakly similar to (83.6)APY_SOLTU no original description'
Glyma13g22620.N5	j	PAC:26314671	TSS50492	No	NO Cluster	AT2G26580	'27.3.10'	'RNA.regulation of transcription.C2C2(Zn) YABBY family'	'moderately similar to ( 245)AT2G26580| Symbols: YAB5 | YAB5 (YABBY5); transcription factor | chr2:11311001-11313817 REVERSEweakly similar to ( 145)YAB1_ORYSA no original description'
Glyma13g22620.N4	j	PAC:26314671	TSS50492	No	NO Cluster	AT2G26580	'27.3.10'	'RNA.regulation of transcription.C2C2(Zn) YABBY family'	'moderately similar to ( 245)AT2G26580| Symbols: YAB5 | YAB5 (YABBY5); transcription factor | chr2:11311001-11313817 REVERSEweakly similar to ( 145)YAB1_ORYSA no original description'
Glyma13g22620.N2	j	PAC:26314671	TSS50491	No	NO Cluster	AT2G26580	'27.3.10'	'RNA.regulation of transcription.C2C2(Zn) YABBY family'	'moderately similar to ( 245)AT2G26580| Symbols: YAB5 | YAB5 (YABBY5); transcription factor | chr2:11311001-11313817 REVERSEweakly similar to ( 145)YAB1_ORYSA no original description'
Glyma13g22620.1	=	PAC:26314671	TSS50493	Yes	20	AT2G26580	'27.3.10'	'RNA.regulation of transcription.C2C2(Zn) YABBY family'	'moderately similar to ( 245)AT2G26580| Symbols: YAB5 | YAB5 (YABBY5); transcription factor | chr2:11311001-11313817 REVERSEweakly similar to ( 145)YAB1_ORYSA no original description'
Glyma13g22620.N3	j	PAC:26314671	TSS50491	No	NO Cluster	AT2G26580	'27.3.10'	'RNA.regulation of transcription.C2C2(Zn) YABBY family'	'moderately similar to ( 245)AT2G26580| Symbols: YAB5 | YAB5 (YABBY5); transcription factor | chr2:11311001-11313817 REVERSEweakly similar to ( 145)YAB1_ORYSA no original description'
Glyma18g00670.N5	j	PAC:26356843	TSS67650	No	NO Cluster	AT1G05520	'29.3.4.2'	'protein.targeting.secretory pathway.golgi'	'nearly identical (1229)AT1G05520| Symbols: | transport protein, putative | chr1:1631125-1635702 REVERSE no original description'
Glyma18g00670.N6	j	PAC:26356843	TSS67650	No	NO Cluster	AT1G05520	'29.3.4.2'	'protein.targeting.secretory pathway.golgi'	'nearly identical (1229)AT1G05520| Symbols: | transport protein, putative | chr1:1631125-1635702 REVERSE no original description'
Glyma18g00670.N7	j	PAC:26356843	TSS67650	No	NO Cluster	AT1G05520	'29.3.4.2'	'protein.targeting.secretory pathway.golgi'	'nearly identical (1229)AT1G05520| Symbols: | transport protein, putative | chr1:1631125-1635702 REVERSE no original description'
Glyma18g00670.N8	j	PAC:26356843	TSS67650	No	NO Cluster	AT1G05520	'29.3.4.2'	'protein.targeting.secretory pathway.golgi'	'nearly identical (1229)AT1G05520| Symbols: | transport protein, putative | chr1:1631125-1635702 REVERSE no original description'
Glyma18g00670.1	=	PAC:26356843	TSS67650	Yes	32	AT1G05520	'29.3.4.2'	'protein.targeting.secretory pathway.golgi'	'nearly identical (1229)AT1G05520| Symbols: | transport protein, putative | chr1:1631125-1635702 REVERSE no original description'
Glyma18g00670.N3	j	PAC:26356843	TSS67650	No	NO Cluster	AT1G05520	'29.3.4.2'	'protein.targeting.secretory pathway.golgi'	'nearly identical (1229)AT1G05520| Symbols: | transport protein, putative | chr1:1631125-1635702 REVERSE no original description'
Glyma18g00670.N4	j	PAC:26356843	TSS67650	No	NO Cluster	AT1G05520	'29.3.4.2'	'protein.targeting.secretory pathway.golgi'	'nearly identical (1229)AT1G05520| Symbols: | transport protein, putative | chr1:1631125-1635702 REVERSE no original description'
Glyma18g00670.N2	j	PAC:26356843	TSS67650	No	NO Cluster	AT1G05520	'29.3.4.2'	'protein.targeting.secretory pathway.golgi'	'nearly identical (1229)AT1G05520| Symbols: | transport protein, putative | chr1:1631125-1635702 REVERSE no original description'
Glyma09g38160.2	=	PAC:26340393	TSS35281	Yes	10	AT3G25500	'31.1'	'cell.organisation'	'highly similar to ( 572)AT3G25500| Symbols: FH1, AHF1, AFH1 | AFH1 (FORMIN HOMOLOGY 1); actin binding | chr3:9252557-9256063 REVERSE no original description'
Glyma09g38160.N4	j	PAC:26340393	TSS35281	No	NO Cluster	AT3G25500	'31.1'	'cell.organisation'	'highly similar to ( 572)AT3G25500| Symbols: FH1, AHF1, AFH1 | AFH1 (FORMIN HOMOLOGY 1); actin binding | chr3:9252557-9256063 REVERSE no original description'
Glyma09g38160.N3	j	PAC:26340393	TSS35281	No	NO Cluster	AT3G25500	'31.1'	'cell.organisation'	'highly similar to ( 572)AT3G25500| Symbols: FH1, AHF1, AFH1 | AFH1 (FORMIN HOMOLOGY 1); actin binding | chr3:9252557-9256063 REVERSE no original description'
Glyma09g38691.N5	j	PAC:26341381	TSS35313	Yes	111	NO MapMan Annotation
Glyma09g38691.N7	j	PAC:26341381	TSS35313	No	NO Cluster	NO MapMan Annotation
Glyma09g38691.N6	j	PAC:26341381	TSS35313	No	NO Cluster	NO MapMan Annotation
Glyma09g38691.1	=	PAC:26341379	TSS35314	No	NO Cluster	NO MapMan Annotation
Glyma09g38691.2	=	PAC:26341380	TSS35314	No	NO Cluster	NO MapMan Annotation
Glyma09g38691.3	=	PAC:26341381	TSS35314	No	NO Cluster	NO MapMan Annotation
Glyma09g38691.4	=	PAC:26341382	TSS35314	No	NO Cluster	NO MapMan Annotation
Glyma09g38691.N8	j	PAC:26341381	TSS35313	No	NO Cluster	NO MapMan Annotation
Glyma17g01820.N7	j	PAC:26313434	TSS63944	No	NO Cluster	AT4G21790	'27.3.99'	'RNA.regulation of transcription.unclassified'	'moderately similar to ( 411)AT4G21790| Symbols: TOM1 | TOM1 (TOBAMOVIRUS MULTIPLICATION 1) | chr4:11569936-11572175 FORWARD no original description'
Glyma17g01820.3	=	PAC:26313436	TSS63944	No	NO Cluster	AT4G21790	'27.3.99'	'RNA.regulation of transcription.unclassified'	'moderately similar to ( 411)AT4G21790| Symbols: TOM1 | TOM1 (TOBAMOVIRUS MULTIPLICATION 1) | chr4:11569936-11572175 FORWARD no original description'
Glyma17g01820.2	=	PAC:26313435	TSS63944	Yes	68	AT4G21790	'27.3.99'	'RNA.regulation of transcription.unclassified'	'moderately similar to ( 411)AT4G21790| Symbols: TOM1 | TOM1 (TOBAMOVIRUS MULTIPLICATION 1) | chr4:11569936-11572175 FORWARD no original description'
Glyma17g01820.1	=	PAC:26313434	TSS63944	No	NO Cluster	AT4G21790	'27.3.99'	'RNA.regulation of transcription.unclassified'	'moderately similar to ( 411)AT4G21790| Symbols: TOM1 | TOM1 (TOBAMOVIRUS MULTIPLICATION 1) | chr4:11569936-11572175 FORWARD no original description'
Glyma17g01820.N6	j	PAC:26313434	TSS63944	No	NO Cluster	AT4G21790	'27.3.99'	'RNA.regulation of transcription.unclassified'	'moderately similar to ( 411)AT4G21790| Symbols: TOM1 | TOM1 (TOBAMOVIRUS MULTIPLICATION 1) | chr4:11569936-11572175 FORWARD no original description'
Glyma17g01820.N5	j	PAC:26313434	TSS63944	No	NO Cluster	AT4G21790	'27.3.99'	'RNA.regulation of transcription.unclassified'	'moderately similar to ( 411)AT4G21790| Symbols: TOM1 | TOM1 (TOBAMOVIRUS MULTIPLICATION 1) | chr4:11569936-11572175 FORWARD no original description'
Glyma17g01820.N4	j	PAC:26313434	TSS63943	No	NO Cluster	AT4G21790	'27.3.99'	'RNA.regulation of transcription.unclassified'	'moderately similar to ( 411)AT4G21790| Symbols: TOM1 | TOM1 (TOBAMOVIRUS MULTIPLICATION 1) | chr4:11569936-11572175 FORWARD no original description'
Glyma09g31780.N2	j	PAC:26341586	TSS34909	No	NO Cluster	AT1G49050	'29.5.4'	'protein.degradation.aspartate protease'	'highly similar to ( 520)AT1G49050| Symbols: | aspartyl protease family protein | chr1:18154829-18156854 FORWARDmoderately similar to ( 276)ASP1_ORYSA no original description'
Glyma09g31780.N4	j	PAC:26341586	TSS34909	No	NO Cluster	AT1G49050	'29.5.4'	'protein.degradation.aspartate protease'	'highly similar to ( 520)AT1G49050| Symbols: | aspartyl protease family protein | chr1:18154829-18156854 FORWARDmoderately similar to ( 276)ASP1_ORYSA no original description'
Glyma09g31780.N3	j	PAC:26341586	TSS34909	No	NO Cluster	AT1G49050	'29.5.4'	'protein.degradation.aspartate protease'	'highly similar to ( 520)AT1G49050| Symbols: | aspartyl protease family protein | chr1:18154829-18156854 FORWARDmoderately similar to ( 276)ASP1_ORYSA no original description'
Glyma09g31780.N5	j	PAC:26341586	TSS34909	No	NO Cluster	AT1G49050	'29.5.4'	'protein.degradation.aspartate protease'	'highly similar to ( 520)AT1G49050| Symbols: | aspartyl protease family protein | chr1:18154829-18156854 FORWARDmoderately similar to ( 276)ASP1_ORYSA no original description'
Glyma09g31780.1	=	PAC:26341586	TSS34909	Yes	37	AT1G49050	'29.5.4'	'protein.degradation.aspartate protease'	'highly similar to ( 520)AT1G49050| Symbols: | aspartyl protease family protein | chr1:18154829-18156854 FORWARDmoderately similar to ( 276)ASP1_ORYSA no original description'
Glyma09g36250.N5	j	PAC:26341946	TSS35174	No	NO Cluster	AT3G21640	'29.6'	'protein.folding'	'highly similar to ( 511)AT3G21640| Symbols: UCU2, FKBP42, TWD1 | TWD1 (TWISTED DWARF 1); FK506 binding / peptidyl-prolyl cis-trans isomerase | chr3:7619032-7621104 REVERSEweakly similar to ( 115)FKB70_WHEAT no original description'
Glyma09g36250.4	=	PAC:26341946	TSS35173	No	NO Cluster	AT3G21640	'29.6'	'protein.folding'	'highly similar to ( 511)AT3G21640| Symbols: UCU2, FKBP42, TWD1 | TWD1 (TWISTED DWARF 1); FK506 binding / peptidyl-prolyl cis-trans isomerase | chr3:7619032-7621104 REVERSEweakly similar to ( 115)FKB70_WHEAT no original description'
Glyma09g36250.3	=	PAC:26341945	TSS35173	Yes	35	AT3G21640	'29.6'	'protein.folding'	'highly similar to ( 511)AT3G21640| Symbols: UCU2, FKBP42, TWD1 | TWD1 (TWISTED DWARF 1); FK506 binding / peptidyl-prolyl cis-trans isomerase | chr3:7619032-7621104 REVERSEweakly similar to ( 115)FKB70_WHEAT no original description'
Glyma09g39560.1	=	PAC:26343418	TSS35369	No	NO Cluster	AT4G00460	'30.5'	'signalling.G-proteins'	'highly similar to ( 534)AT4G00460| Symbols: ATROPGEF3, ROPGEF3 | ATROPGEF3/ROPGEF3 (KINASE PARTNER PROTEIN-LIKE) | chr4:211146-213094 REVERSE no original description'
Glyma09g39560.N6	j	PAC:26343416	TSS35369	No	NO Cluster	AT4G00460	'30.5'	'signalling.G-proteins'	'highly similar to ( 534)AT4G00460| Symbols: ATROPGEF3, ROPGEF3 | ATROPGEF3/ROPGEF3 (KINASE PARTNER PROTEIN-LIKE) | chr4:211146-213094 REVERSE no original description'
Glyma09g39560.N7	j	PAC:26343416	TSS35370	No	NO Cluster	AT4G00460	'30.5'	'signalling.G-proteins'	'highly similar to ( 534)AT4G00460| Symbols: ATROPGEF3, ROPGEF3 | ATROPGEF3/ROPGEF3 (KINASE PARTNER PROTEIN-LIKE) | chr4:211146-213094 REVERSE no original description'
Glyma09g39560.N5	j	PAC:26343416	TSS35369	No	NO Cluster	AT4G00460	'30.5'	'signalling.G-proteins'	'highly similar to ( 534)AT4G00460| Symbols: ATROPGEF3, ROPGEF3 | ATROPGEF3/ROPGEF3 (KINASE PARTNER PROTEIN-LIKE) | chr4:211146-213094 REVERSE no original description'
Glyma09g39560.N4	j	PAC:26343416	TSS35369	No	NO Cluster	AT4G00460	'30.5'	'signalling.G-proteins'	'highly similar to ( 534)AT4G00460| Symbols: ATROPGEF3, ROPGEF3 | ATROPGEF3/ROPGEF3 (KINASE PARTNER PROTEIN-LIKE) | chr4:211146-213094 REVERSE no original description'
Glyma09g39560.3	=	PAC:26343417	TSS35369	Yes	11	AT4G00460	'30.5'	'signalling.G-proteins'	'highly similar to ( 534)AT4G00460| Symbols: ATROPGEF3, ROPGEF3 | ATROPGEF3/ROPGEF3 (KINASE PARTNER PROTEIN-LIKE) | chr4:211146-213094 REVERSE no original description'
Glyma09g39560.2	=	PAC:26343416	TSS35369	No	NO Cluster	AT4G00460	'30.5'	'signalling.G-proteins'	'highly similar to ( 534)AT4G00460| Symbols: ATROPGEF3, ROPGEF3 | ATROPGEF3/ROPGEF3 (KINASE PARTNER PROTEIN-LIKE) | chr4:211146-213094 REVERSE no original description'
Glyma20g28960.1	=	PAC:26336844	TSS74366	Yes	58	AT1G04210	'29.4'	'protein.postranslational modification'	'highly similar to ( 938)AT1G04210| Symbols: | leucine-rich repeat family protein / protein kinase family protein | chr1:1114695-1119382 FORWARD no original description'
Glyma20g28960.N6	j	PAC:26336844	TSS74366	No	NO Cluster	AT1G04210	'29.4'	'protein.postranslational modification'	'highly similar to ( 938)AT1G04210| Symbols: | leucine-rich repeat family protein / protein kinase family protein | chr1:1114695-1119382 FORWARD no original description'
Glyma20g28960.N2	j	PAC:26336844	TSS74366	No	NO Cluster	AT1G04210	'29.4'	'protein.postranslational modification'	'highly similar to ( 938)AT1G04210| Symbols: | leucine-rich repeat family protein / protein kinase family protein | chr1:1114695-1119382 FORWARD no original description'
Glyma20g28960.N3	j	PAC:26336844	TSS74366	No	NO Cluster	AT1G04210	'29.4'	'protein.postranslational modification'	'highly similar to ( 938)AT1G04210| Symbols: | leucine-rich repeat family protein / protein kinase family protein | chr1:1114695-1119382 FORWARD no original description'
Glyma20g28960.N4	j	PAC:26336844	TSS74366	No	NO Cluster	AT1G04210	'29.4'	'protein.postranslational modification'	'highly similar to ( 938)AT1G04210| Symbols: | leucine-rich repeat family protein / protein kinase family protein | chr1:1114695-1119382 FORWARD no original description'
Glyma20g28960.N5	j	PAC:26336844	TSS74366	No	NO Cluster	AT1G04210	'29.4'	'protein.postranslational modification'	'highly similar to ( 938)AT1G04210| Symbols: | leucine-rich repeat family protein / protein kinase family protein | chr1:1114695-1119382 FORWARD no original description'
Glyma06g48020.1	=	PAC:26299073	TSS20539	Yes	114	No Arabidopsis Homolohue	'35.2'	'not assigned.unknown'	'no original description'
Glyma06g48020.N3	j	PAC:26299073	TSS20539	No	NO Cluster	No Arabidopsis Homolohue	'35.2'	'not assigned.unknown'	'no original description'
Glyma06g48020.N2	j	PAC:26299073	TSS20539	No	NO Cluster	No Arabidopsis Homolohue	'35.2'	'not assigned.unknown'	'no original description'
Glyma06g48020.N4	j	PAC:26299073	TSS20539	No	NO Cluster	No Arabidopsis Homolohue	'35.2'	'not assigned.unknown'	'no original description'
Glyma15g04871.N3	j	PAC:26332264	TSS57321	No	NO Cluster	NO MapMan Annotation
Glyma15g04871.N2	j	PAC:26332264	TSS57321	No	NO Cluster	NO MapMan Annotation
Glyma15g04871.N5	j	PAC:26332264	TSS57322	No	NO Cluster	NO MapMan Annotation
Glyma15g04871.N4	j	PAC:26332264	TSS57322	Yes	49	NO MapMan Annotation
Glyma15g04871.N6	j	PAC:26332264	TSS57322	No	NO Cluster	NO MapMan Annotation
Glyma15g04871.N7	j	PAC:26332264	TSS57322	No	NO Cluster	NO MapMan Annotation
Glyma15g04871.1	=	PAC:26332264	TSS57322	No	NO Cluster	NO MapMan Annotation
Glyma10g37110.N8	j	PAC:26344093	TSS39300	No	NO Cluster	AT5G42140	'31.2'	'cell.division'	'nearly identical (1343)AT5G42140| Symbols: | zinc finger protein, putative / regulator of chromosome condensation (RCC1) family protein | chr5:16854775-16858868 REVERSE no original description'
Glyma10g37110.N9	j	PAC:26344093	TSS39300	No	NO Cluster	AT5G42140	'31.2'	'cell.division'	'nearly identical (1343)AT5G42140| Symbols: | zinc finger protein, putative / regulator of chromosome condensation (RCC1) family protein | chr5:16854775-16858868 REVERSE no original description'
Glyma10g37110.N2	j	PAC:26344093	TSS39299	No	NO Cluster	AT5G42140	'31.2'	'cell.division'	'nearly identical (1343)AT5G42140| Symbols: | zinc finger protein, putative / regulator of chromosome condensation (RCC1) family protein | chr5:16854775-16858868 REVERSE no original description'
Glyma10g37110.N3	j	PAC:26344093	TSS39300	No	NO Cluster	AT5G42140	'31.2'	'cell.division'	'nearly identical (1343)AT5G42140| Symbols: | zinc finger protein, putative / regulator of chromosome condensation (RCC1) family protein | chr5:16854775-16858868 REVERSE no original description'
Glyma10g37110.N4	j	PAC:26344093	TSS39300	No	NO Cluster	AT5G42140	'31.2'	'cell.division'	'nearly identical (1343)AT5G42140| Symbols: | zinc finger protein, putative / regulator of chromosome condensation (RCC1) family protein | chr5:16854775-16858868 REVERSE no original description'
Glyma10g37110.N5	j	PAC:26344093	TSS39300	No	NO Cluster	AT5G42140	'31.2'	'cell.division'	'nearly identical (1343)AT5G42140| Symbols: | zinc finger protein, putative / regulator of chromosome condensation (RCC1) family protein | chr5:16854775-16858868 REVERSE no original description'
Glyma10g37110.1	=	PAC:26344093	TSS39300	Yes	34	AT5G42140	'31.2'	'cell.division'	'nearly identical (1343)AT5G42140| Symbols: | zinc finger protein, putative / regulator of chromosome condensation (RCC1) family protein | chr5:16854775-16858868 REVERSE no original description'
Glyma10g37110.N6	j	PAC:26344093	TSS39300	No	NO Cluster	AT5G42140	'31.2'	'cell.division'	'nearly identical (1343)AT5G42140| Symbols: | zinc finger protein, putative / regulator of chromosome condensation (RCC1) family protein | chr5:16854775-16858868 REVERSE no original description'
Glyma10g37110.N7	j	PAC:26344093	TSS39300	No	NO Cluster	AT5G42140	'31.2'	'cell.division'	'nearly identical (1343)AT5G42140| Symbols: | zinc finger protein, putative / regulator of chromosome condensation (RCC1) family protein | chr5:16854775-16858868 REVERSE no original description'
Glyma13g36160.N2	j	PAC:26318718	TSS48805	No	NO Cluster	AT4G27250	'16.8.4.1'	'secondary metabolism.flavonoids.flavonols.dihydrokaempferol 4-reductase'	'weakly similar to ( 150)AT4G27250| Symbols: | dihydroflavonol 4-reductase family / dihydrokaempferol 4-reductase family | chr4:13642809-13644431 REVERSEvery weakly similar to (81.6)DFRA_VITVI no original description'
Glyma13g36160.N3	j	PAC:26318718	TSS48805	No	NO Cluster	AT4G27250	'16.8.4.1'	'secondary metabolism.flavonoids.flavonols.dihydrokaempferol 4-reductase'	'weakly similar to ( 150)AT4G27250| Symbols: | dihydroflavonol 4-reductase family / dihydrokaempferol 4-reductase family | chr4:13642809-13644431 REVERSEvery weakly similar to (81.6)DFRA_VITVI no original description'
Glyma13g36160.N4	j	PAC:26318718	TSS48805	Yes	38	AT4G27250	'16.8.4.1'	'secondary metabolism.flavonoids.flavonols.dihydrokaempferol 4-reductase'	'weakly similar to ( 150)AT4G27250| Symbols: | dihydroflavonol 4-reductase family / dihydrokaempferol 4-reductase family | chr4:13642809-13644431 REVERSEvery weakly similar to (81.6)DFRA_VITVI no original description'
Glyma13g36160.1	=	PAC:26318718	TSS48806	No	NO Cluster	AT4G27250	'16.8.4.1'	'secondary metabolism.flavonoids.flavonols.dihydrokaempferol 4-reductase'	'weakly similar to ( 150)AT4G27250| Symbols: | dihydroflavonol 4-reductase family / dihydrokaempferol 4-reductase family | chr4:13642809-13644431 REVERSEvery weakly similar to (81.6)DFRA_VITVI no original description'
Glyma17g14680.N4	j	PAC:26314259	TSS62915	No	NO Cluster	AT1G62710	'29.3.4.3'	'protein.targeting.secretory pathway.vacuole'	'highly similar to ( 666)AT1G62710| Symbols: BETAVPE, BETA-VPE | BETA-VPE (vacuolar processing enzyme beta); cysteine-type endopeptidase | chr1:23227735-23230522 REVERSEhighly similar to ( 971)VPE_SOYBN no original description'
Glyma17g14680.N3	j	PAC:26314259	TSS62915	No	NO Cluster	AT1G62710	'29.3.4.3'	'protein.targeting.secretory pathway.vacuole'	'highly similar to ( 666)AT1G62710| Symbols: BETAVPE, BETA-VPE | BETA-VPE (vacuolar processing enzyme beta); cysteine-type endopeptidase | chr1:23227735-23230522 REVERSEhighly similar to ( 971)VPE_SOYBN no original description'
Glyma17g14680.N2	j	PAC:26314259	TSS62915	No	NO Cluster	AT1G62710	'29.3.4.3'	'protein.targeting.secretory pathway.vacuole'	'highly similar to ( 666)AT1G62710| Symbols: BETAVPE, BETA-VPE | BETA-VPE (vacuolar processing enzyme beta); cysteine-type endopeptidase | chr1:23227735-23230522 REVERSEhighly similar to ( 971)VPE_SOYBN no original description'
Glyma17g14680.N8	j	PAC:26314259	TSS62915	No	NO Cluster	AT1G62710	'29.3.4.3'	'protein.targeting.secretory pathway.vacuole'	'highly similar to ( 666)AT1G62710| Symbols: BETAVPE, BETA-VPE | BETA-VPE (vacuolar processing enzyme beta); cysteine-type endopeptidase | chr1:23227735-23230522 REVERSEhighly similar to ( 971)VPE_SOYBN no original description'
Glyma17g14680.N7	j	PAC:26314259	TSS62915	No	NO Cluster	AT1G62710	'29.3.4.3'	'protein.targeting.secretory pathway.vacuole'	'highly similar to ( 666)AT1G62710| Symbols: BETAVPE, BETA-VPE | BETA-VPE (vacuolar processing enzyme beta); cysteine-type endopeptidase | chr1:23227735-23230522 REVERSEhighly similar to ( 971)VPE_SOYBN no original description'
Glyma17g14680.N6	j	PAC:26314259	TSS62915	No	NO Cluster	AT1G62710	'29.3.4.3'	'protein.targeting.secretory pathway.vacuole'	'highly similar to ( 666)AT1G62710| Symbols: BETAVPE, BETA-VPE | BETA-VPE (vacuolar processing enzyme beta); cysteine-type endopeptidase | chr1:23227735-23230522 REVERSEhighly similar to ( 971)VPE_SOYBN no original description'
Glyma17g14680.N5	j	PAC:26314259	TSS62915	No	NO Cluster	AT1G62710	'29.3.4.3'	'protein.targeting.secretory pathway.vacuole'	'highly similar to ( 666)AT1G62710| Symbols: BETAVPE, BETA-VPE | BETA-VPE (vacuolar processing enzyme beta); cysteine-type endopeptidase | chr1:23227735-23230522 REVERSEhighly similar to ( 971)VPE_SOYBN no original description'
Glyma17g14680.N10	j	PAC:26314259	TSS62915	No	NO Cluster	AT1G62710	'29.3.4.3'	'protein.targeting.secretory pathway.vacuole'	'highly similar to ( 666)AT1G62710| Symbols: BETAVPE, BETA-VPE | BETA-VPE (vacuolar processing enzyme beta); cysteine-type endopeptidase | chr1:23227735-23230522 REVERSEhighly similar to ( 971)VPE_SOYBN no original description'
Glyma17g14680.N9	j	PAC:26314259	TSS62915	No	NO Cluster	AT1G62710	'29.3.4.3'	'protein.targeting.secretory pathway.vacuole'	'highly similar to ( 666)AT1G62710| Symbols: BETAVPE, BETA-VPE | BETA-VPE (vacuolar processing enzyme beta); cysteine-type endopeptidase | chr1:23227735-23230522 REVERSEhighly similar to ( 971)VPE_SOYBN no original description'
Glyma17g14680.1	=	PAC:26314259	TSS62915	Yes	69	AT1G62710	'29.3.4.3'	'protein.targeting.secretory pathway.vacuole'	'highly similar to ( 666)AT1G62710| Symbols: BETAVPE, BETA-VPE | BETA-VPE (vacuolar processing enzyme beta); cysteine-type endopeptidase | chr1:23227735-23230522 REVERSEhighly similar to ( 971)VPE_SOYBN no original description'
Glyma03g33360.N5	j	PAC:26333349	TSS8789	No	NO Cluster	AT1G09795	'13.1.7.1'	'amino acid metabolism.synthesis.histidine.ATP phosphoribosyl transferase'	'highly similar to ( 577)AT1G09795| Symbols: HISN1B, ATATP-PRT2 | ATATP-PRT2 (ATP PHOSPHORIBOSYL TRANSFERASE 2); ATP phosphoribosyltransferase | chr1:3173590-3176692 FORWARD no original description'
Glyma03g33360.N4	j	PAC:26333349	TSS8789	No	NO Cluster	AT1G09795	'13.1.7.1'	'amino acid metabolism.synthesis.histidine.ATP phosphoribosyl transferase'	'highly similar to ( 577)AT1G09795| Symbols: HISN1B, ATATP-PRT2 | ATATP-PRT2 (ATP PHOSPHORIBOSYL TRANSFERASE 2); ATP phosphoribosyltransferase | chr1:3173590-3176692 FORWARD no original description'
Glyma03g33360.1	=	PAC:26333349	TSS8789	Yes	24	AT1G09795	'13.1.7.1'	'amino acid metabolism.synthesis.histidine.ATP phosphoribosyl transferase'	'highly similar to ( 577)AT1G09795| Symbols: HISN1B, ATATP-PRT2 | ATATP-PRT2 (ATP PHOSPHORIBOSYL TRANSFERASE 2); ATP phosphoribosyltransferase | chr1:3173590-3176692 FORWARD no original description'
Glyma03g33360.N3	j	PAC:26333349	TSS8789	No	NO Cluster	AT1G09795	'13.1.7.1'	'amino acid metabolism.synthesis.histidine.ATP phosphoribosyl transferase'	'highly similar to ( 577)AT1G09795| Symbols: HISN1B, ATATP-PRT2 | ATATP-PRT2 (ATP PHOSPHORIBOSYL TRANSFERASE 2); ATP phosphoribosyltransferase | chr1:3173590-3176692 FORWARD no original description'
Glyma03g33360.N2	j	PAC:26333349	TSS8789	No	NO Cluster	AT1G09795	'13.1.7.1'	'amino acid metabolism.synthesis.histidine.ATP phosphoribosyl transferase'	'highly similar to ( 577)AT1G09795| Symbols: HISN1B, ATATP-PRT2 | ATATP-PRT2 (ATP PHOSPHORIBOSYL TRANSFERASE 2); ATP phosphoribosyltransferase | chr1:3173590-3176692 FORWARD no original description'
Glyma03g33360.N8	j	PAC:26333349	TSS8789	No	NO Cluster	AT1G09795	'13.1.7.1'	'amino acid metabolism.synthesis.histidine.ATP phosphoribosyl transferase'	'highly similar to ( 577)AT1G09795| Symbols: HISN1B, ATATP-PRT2 | ATATP-PRT2 (ATP PHOSPHORIBOSYL TRANSFERASE 2); ATP phosphoribosyltransferase | chr1:3173590-3176692 FORWARD no original description'
Glyma03g33360.N14	j	PAC:26333349	TSS8789	No	NO Cluster	AT1G09795	'13.1.7.1'	'amino acid metabolism.synthesis.histidine.ATP phosphoribosyl transferase'	'highly similar to ( 577)AT1G09795| Symbols: HISN1B, ATATP-PRT2 | ATATP-PRT2 (ATP PHOSPHORIBOSYL TRANSFERASE 2); ATP phosphoribosyltransferase | chr1:3173590-3176692 FORWARD no original description'
Glyma03g33360.N9	j	PAC:26333349	TSS8789	No	NO Cluster	AT1G09795	'13.1.7.1'	'amino acid metabolism.synthesis.histidine.ATP phosphoribosyl transferase'	'highly similar to ( 577)AT1G09795| Symbols: HISN1B, ATATP-PRT2 | ATATP-PRT2 (ATP PHOSPHORIBOSYL TRANSFERASE 2); ATP phosphoribosyltransferase | chr1:3173590-3176692 FORWARD no original description'
Glyma03g33360.N6	j	PAC:26333349	TSS8789	No	NO Cluster	AT1G09795	'13.1.7.1'	'amino acid metabolism.synthesis.histidine.ATP phosphoribosyl transferase'	'highly similar to ( 577)AT1G09795| Symbols: HISN1B, ATATP-PRT2 | ATATP-PRT2 (ATP PHOSPHORIBOSYL TRANSFERASE 2); ATP phosphoribosyltransferase | chr1:3173590-3176692 FORWARD no original description'
Glyma03g33360.N7	j	PAC:26333349	TSS8789	No	NO Cluster	AT1G09795	'13.1.7.1'	'amino acid metabolism.synthesis.histidine.ATP phosphoribosyl transferase'	'highly similar to ( 577)AT1G09795| Symbols: HISN1B, ATATP-PRT2 | ATATP-PRT2 (ATP PHOSPHORIBOSYL TRANSFERASE 2); ATP phosphoribosyltransferase | chr1:3173590-3176692 FORWARD no original description'
Glyma03g33360.N12	j	PAC:26333349	TSS8789	No	NO Cluster	AT1G09795	'13.1.7.1'	'amino acid metabolism.synthesis.histidine.ATP phosphoribosyl transferase'	'highly similar to ( 577)AT1G09795| Symbols: HISN1B, ATATP-PRT2 | ATATP-PRT2 (ATP PHOSPHORIBOSYL TRANSFERASE 2); ATP phosphoribosyltransferase | chr1:3173590-3176692 FORWARD no original description'
Glyma03g33360.N13	j	PAC:26333349	TSS8789	No	NO Cluster	AT1G09795	'13.1.7.1'	'amino acid metabolism.synthesis.histidine.ATP phosphoribosyl transferase'	'highly similar to ( 577)AT1G09795| Symbols: HISN1B, ATATP-PRT2 | ATATP-PRT2 (ATP PHOSPHORIBOSYL TRANSFERASE 2); ATP phosphoribosyltransferase | chr1:3173590-3176692 FORWARD no original description'
Glyma03g33360.N10	j	PAC:26333349	TSS8789	No	NO Cluster	AT1G09795	'13.1.7.1'	'amino acid metabolism.synthesis.histidine.ATP phosphoribosyl transferase'	'highly similar to ( 577)AT1G09795| Symbols: HISN1B, ATATP-PRT2 | ATATP-PRT2 (ATP PHOSPHORIBOSYL TRANSFERASE 2); ATP phosphoribosyltransferase | chr1:3173590-3176692 FORWARD no original description'
Glyma03g33360.N11	j	PAC:26333349	TSS8789	No	NO Cluster	AT1G09795	'13.1.7.1'	'amino acid metabolism.synthesis.histidine.ATP phosphoribosyl transferase'	'highly similar to ( 577)AT1G09795| Symbols: HISN1B, ATATP-PRT2 | ATATP-PRT2 (ATP PHOSPHORIBOSYL TRANSFERASE 2); ATP phosphoribosyltransferase | chr1:3173590-3176692 FORWARD no original description'
Glyma05g14300.N7	j	PAC:26319729	TSS17072	No	NO Cluster	AT3G27080	'29.3.2'	'protein.targeting.mitochondria'	'moderately similar to ( 215)AT3G27080| Symbols: TOM20-3 | TOM20-3 (TRANSLOCASE OF OUTER MEMBRANE 20 KDA SUBUNIT 3); P-P-bond-hydrolysis-driven protein transmembrane transporter | chr3:9986449-9987797 REVERSEmoderately similar to ( 261)TOM20_SOLTU no original description'
Glyma05g14300.N6	j	PAC:26319729	TSS17072	No	NO Cluster	AT3G27080	'29.3.2'	'protein.targeting.mitochondria'	'moderately similar to ( 215)AT3G27080| Symbols: TOM20-3 | TOM20-3 (TRANSLOCASE OF OUTER MEMBRANE 20 KDA SUBUNIT 3); P-P-bond-hydrolysis-driven protein transmembrane transporter | chr3:9986449-9987797 REVERSEmoderately similar to ( 261)TOM20_SOLTU no original description'
Glyma05g14300.4	=	PAC:26319731	TSS17072	No	NO Cluster	AT3G27080	'29.3.2'	'protein.targeting.mitochondria'	'moderately similar to ( 215)AT3G27080| Symbols: TOM20-3 | TOM20-3 (TRANSLOCASE OF OUTER MEMBRANE 20 KDA SUBUNIT 3); P-P-bond-hydrolysis-driven protein transmembrane transporter | chr3:9986449-9987797 REVERSEmoderately similar to ( 261)TOM20_SOLTU no original description'
Glyma05g14300.N5	j	PAC:26319729	TSS17072	No	NO Cluster	AT3G27080	'29.3.2'	'protein.targeting.mitochondria'	'moderately similar to ( 215)AT3G27080| Symbols: TOM20-3 | TOM20-3 (TRANSLOCASE OF OUTER MEMBRANE 20 KDA SUBUNIT 3); P-P-bond-hydrolysis-driven protein transmembrane transporter | chr3:9986449-9987797 REVERSEmoderately similar to ( 261)TOM20_SOLTU no original description'
Glyma05g14300.4	=	PAC:26319731	TSS17072	No	NO Cluster	AT3G27080	'29.3.2'	'protein.targeting.mitochondria'	'moderately similar to ( 215)AT3G27080| Symbols: TOM20-3 | TOM20-3 (TRANSLOCASE OF OUTER MEMBRANE 20 KDA SUBUNIT 3); P-P-bond-hydrolysis-driven protein transmembrane transporter | chr3:9986449-9987797 REVERSEmoderately similar to ( 261)TOM20_SOLTU no original description'
Glyma05g14300.N12	j	PAC:26319729	TSS17072	No	NO Cluster	AT3G27080	'29.3.2'	'protein.targeting.mitochondria'	'moderately similar to ( 215)AT3G27080| Symbols: TOM20-3 | TOM20-3 (TRANSLOCASE OF OUTER MEMBRANE 20 KDA SUBUNIT 3); P-P-bond-hydrolysis-driven protein transmembrane transporter | chr3:9986449-9987797 REVERSEmoderately similar to ( 261)TOM20_SOLTU no original description'
Glyma05g14300.3	=	PAC:26319730	TSS17072	No	NO Cluster	AT3G27080	'29.3.2'	'protein.targeting.mitochondria'	'moderately similar to ( 215)AT3G27080| Symbols: TOM20-3 | TOM20-3 (TRANSLOCASE OF OUTER MEMBRANE 20 KDA SUBUNIT 3); P-P-bond-hydrolysis-driven protein transmembrane transporter | chr3:9986449-9987797 REVERSEmoderately similar to ( 261)TOM20_SOLTU no original description'
Glyma05g14300.N11	j	PAC:26319729	TSS17072	No	NO Cluster	AT3G27080	'29.3.2'	'protein.targeting.mitochondria'	'moderately similar to ( 215)AT3G27080| Symbols: TOM20-3 | TOM20-3 (TRANSLOCASE OF OUTER MEMBRANE 20 KDA SUBUNIT 3); P-P-bond-hydrolysis-driven protein transmembrane transporter | chr3:9986449-9987797 REVERSEmoderately similar to ( 261)TOM20_SOLTU no original description'
Glyma05g14300.N10	j	PAC:26319729	TSS17072	No	NO Cluster	AT3G27080	'29.3.2'	'protein.targeting.mitochondria'	'moderately similar to ( 215)AT3G27080| Symbols: TOM20-3 | TOM20-3 (TRANSLOCASE OF OUTER MEMBRANE 20 KDA SUBUNIT 3); P-P-bond-hydrolysis-driven protein transmembrane transporter | chr3:9986449-9987797 REVERSEmoderately similar to ( 261)TOM20_SOLTU no original description'
Glyma05g14300.1	=	PAC:26319729	TSS17072	Yes	73	AT3G27080	'29.3.2'	'protein.targeting.mitochondria'	'moderately similar to ( 215)AT3G27080| Symbols: TOM20-3 | TOM20-3 (TRANSLOCASE OF OUTER MEMBRANE 20 KDA SUBUNIT 3); P-P-bond-hydrolysis-driven protein transmembrane transporter | chr3:9986449-9987797 REVERSEmoderately similar to ( 261)TOM20_SOLTU no original description'
Glyma05g14300.N8	j	PAC:26319729	TSS17072	No	NO Cluster	AT3G27080	'29.3.2'	'protein.targeting.mitochondria'	'moderately similar to ( 215)AT3G27080| Symbols: TOM20-3 | TOM20-3 (TRANSLOCASE OF OUTER MEMBRANE 20 KDA SUBUNIT 3); P-P-bond-hydrolysis-driven protein transmembrane transporter | chr3:9986449-9987797 REVERSEmoderately similar to ( 261)TOM20_SOLTU no original description'
Glyma05g14300.N9	j	PAC:26319729	TSS17072	No	NO Cluster	AT3G27080	'29.3.2'	'protein.targeting.mitochondria'	'moderately similar to ( 215)AT3G27080| Symbols: TOM20-3 | TOM20-3 (TRANSLOCASE OF OUTER MEMBRANE 20 KDA SUBUNIT 3); P-P-bond-hydrolysis-driven protein transmembrane transporter | chr3:9986449-9987797 REVERSEmoderately similar to ( 261)TOM20_SOLTU no original description'
Glyma03g18770.N5	j	PAC:26335484	TSS9971	No	NO Cluster	AT4G13630	'35.2'	'not assigned.unknown'	'weakly similar to ( 105)AT4G13630| Symbols: | similar to unknown protein [Arabidopsis thaliana] (TAIR:AT1G04890.1); similar to unnamed protein product [Vitis vinifera] (GB:CAO43544.1); contains InterPro domain Protein of unknown function DUF593 (InterPro:IPR007656) | chr4:7934089-7936025 REVERSE no original description'
Glyma03g18770.4	=	PAC:26335485	TSS9971	No	NO Cluster	AT4G13630	'35.2'	'not assigned.unknown'	'weakly similar to ( 105)AT4G13630| Symbols: | similar to unknown protein [Arabidopsis thaliana] (TAIR:AT1G04890.1); similar to unnamed protein product [Vitis vinifera] (GB:CAO43544.1); contains InterPro domain Protein of unknown function DUF593 (InterPro:IPR007656) | chr4:7934089-7936025 REVERSE no original description'
Glyma03g18770.N7	j	PAC:26335484	TSS9971	Yes	61	AT4G13630	'35.2'	'not assigned.unknown'	'weakly similar to ( 105)AT4G13630| Symbols: | similar to unknown protein [Arabidopsis thaliana] (TAIR:AT1G04890.1); similar to unnamed protein product [Vitis vinifera] (GB:CAO43544.1); contains InterPro domain Protein of unknown function DUF593 (InterPro:IPR007656) | chr4:7934089-7936025 REVERSE no original description'
Glyma03g18770.N6	j	PAC:26335484	TSS9971	No	NO Cluster	AT4G13630	'35.2'	'not assigned.unknown'	'weakly similar to ( 105)AT4G13630| Symbols: | similar to unknown protein [Arabidopsis thaliana] (TAIR:AT1G04890.1); similar to unnamed protein product [Vitis vinifera] (GB:CAO43544.1); contains InterPro domain Protein of unknown function DUF593 (InterPro:IPR007656) | chr4:7934089-7936025 REVERSE no original description'
Glyma03g18770.3	=	PAC:26335484	TSS9971	No	NO Cluster	AT4G13630	'35.2'	'not assigned.unknown'	'weakly similar to ( 105)AT4G13630| Symbols: | similar to unknown protein [Arabidopsis thaliana] (TAIR:AT1G04890.1); similar to unnamed protein product [Vitis vinifera] (GB:CAO43544.1); contains InterPro domain Protein of unknown function DUF593 (InterPro:IPR007656) | chr4:7934089-7936025 REVERSE no original description'
Glyma10g41071.1	=	PAC:26345252	TSS39545	No	NO Cluster	NO MapMan Annotation
Glyma10g41071.N18	j	PAC:26345260	TSS39545	No	NO Cluster	NO MapMan Annotation
Glyma10g41071.3	=	PAC:26345254	TSS39545	No	NO Cluster	NO MapMan Annotation
Glyma10g41071.2	=	PAC:26345253	TSS39545	No	NO Cluster	NO MapMan Annotation
Glyma10g41071.N14	j	PAC:26345260	TSS39545	No	NO Cluster	NO MapMan Annotation
Glyma10g41071.N17	j	PAC:26345260	TSS39545	No	NO Cluster	NO MapMan Annotation
Glyma10g41071.N16	j	PAC:26345260	TSS39545	No	NO Cluster	NO MapMan Annotation
Glyma10g41071.6	=	PAC:26345257	TSS39545	No	NO Cluster	NO MapMan Annotation
Glyma10g41071.4	=	PAC:26345255	TSS39545	No	NO Cluster	NO MapMan Annotation
Glyma10g41071.5	=	PAC:26345256	TSS39545	No	NO Cluster	NO MapMan Annotation
Glyma10g41071.11	=	PAC:26345262	TSS39545	No	NO Cluster	NO MapMan Annotation
Glyma10g41071.12	=	PAC:26345263	TSS39545	No	NO Cluster	NO MapMan Annotation
Glyma10g41071.7	=	PAC:26345258	TSS39545	Yes	70	NO MapMan Annotation
Glyma10g41071.8	=	PAC:26345259	TSS39545	No	NO Cluster	NO MapMan Annotation
Glyma10g41071.9	=	PAC:26345260	TSS39545	No	NO Cluster	NO MapMan Annotation
Glyma10g41071.10	=	PAC:26345261	TSS39545	No	NO Cluster	NO MapMan Annotation
Glyma10g41071.N13	x	PAC:26345256	TSS37502	No	NO Cluster	NO MapMan Annotation
Glyma11g27720.1	=	PAC:26296712	TSS43119	Yes	88	AT3G47340	'13.1.3.1'	'amino acid metabolism.synthesis.aspartate family.asparagine'	'nearly identical (1015)AT3G47340| Symbols: DIN6, AT-ASN1, ASN1 | ASN1 (DARK INDUCIBLE 6) | chr3:17449430-17452028 REVERSEnearly identical (1090)ASNS2_LOTJA no original description'
Glyma11g27720.N4	j	PAC:26296712	TSS43119	No	NO Cluster	AT3G47340	'13.1.3.1'	'amino acid metabolism.synthesis.aspartate family.asparagine'	'nearly identical (1015)AT3G47340| Symbols: DIN6, AT-ASN1, ASN1 | ASN1 (DARK INDUCIBLE 6) | chr3:17449430-17452028 REVERSEnearly identical (1090)ASNS2_LOTJA no original description'
Glyma11g27720.N2	j	PAC:26296712	TSS43118	No	NO Cluster	AT3G47340	'13.1.3.1'	'amino acid metabolism.synthesis.aspartate family.asparagine'	'nearly identical (1015)AT3G47340| Symbols: DIN6, AT-ASN1, ASN1 | ASN1 (DARK INDUCIBLE 6) | chr3:17449430-17452028 REVERSEnearly identical (1090)ASNS2_LOTJA no original description'
Glyma11g27720.N3	j	PAC:26296712	TSS43118	No	NO Cluster	AT3G47340	'13.1.3.1'	'amino acid metabolism.synthesis.aspartate family.asparagine'	'nearly identical (1015)AT3G47340| Symbols: DIN6, AT-ASN1, ASN1 | ASN1 (DARK INDUCIBLE 6) | chr3:17449430-17452028 REVERSEnearly identical (1090)ASNS2_LOTJA no original description'
Glyma05g06090.2	=	PAC:26319964	TSS15146	No	NO Cluster	AT4G18010	'28.1'	'DNA.synthesis/chromatin structure'	'highly similar to ( 628)AT4G18010| Symbols: IP5PII | IP5PII (INOSITOL POLYPHOSPHATE 5-PHOSPHATASE II); inositol-polyphosphate 5-phosphatase | chr4:9991206-9994111 REVERSE no original description'
Glyma05g06090.1	=	PAC:26319963	TSS15146	No	NO Cluster	AT4G18010	'28.1'	'DNA.synthesis/chromatin structure'	'highly similar to ( 628)AT4G18010| Symbols: IP5PII | IP5PII (INOSITOL POLYPHOSPHATE 5-PHOSPHATASE II); inositol-polyphosphate 5-phosphatase | chr4:9991206-9994111 REVERSE no original description'
Glyma05g06090.N3	j	PAC:26319963	TSS15146	Yes	53	AT4G18010	'28.1'	'DNA.synthesis/chromatin structure'	'highly similar to ( 628)AT4G18010| Symbols: IP5PII | IP5PII (INOSITOL POLYPHOSPHATE 5-PHOSPHATASE II); inositol-polyphosphate 5-phosphatase | chr4:9991206-9994111 REVERSE no original description'
Glyma18g07480.N2	j	PAC:26354434	TSS66068	No	NO Cluster	AT3G46970	'2.2.2.2'	'major CHO metabolism.degradation.starch.starch phosphorylase'	'nearly identical (1410)AT3G46970| Symbols: ATPHS2, PHS2 | ATPHS2/PHS2 (ALPHA-GLUCAN PHOSPHORYLASE 2); phosphorylase/ transferase, transferring glycosyl groups | chr3:17312610-17317096 REVERSEnearly identical (1542)PHSH_VICFA no original description'
Glyma18g07480.N3	j	PAC:26354434	TSS66068	No	NO Cluster	AT3G46970	'2.2.2.2'	'major CHO metabolism.degradation.starch.starch phosphorylase'	'nearly identical (1410)AT3G46970| Symbols: ATPHS2, PHS2 | ATPHS2/PHS2 (ALPHA-GLUCAN PHOSPHORYLASE 2); phosphorylase/ transferase, transferring glycosyl groups | chr3:17312610-17317096 REVERSEnearly identical (1542)PHSH_VICFA no original description'
Glyma18g07480.N4	j	PAC:26354434	TSS66068	No	NO Cluster	AT3G46970	'2.2.2.2'	'major CHO metabolism.degradation.starch.starch phosphorylase'	'nearly identical (1410)AT3G46970| Symbols: ATPHS2, PHS2 | ATPHS2/PHS2 (ALPHA-GLUCAN PHOSPHORYLASE 2); phosphorylase/ transferase, transferring glycosyl groups | chr3:17312610-17317096 REVERSEnearly identical (1542)PHSH_VICFA no original description'
Glyma18g07480.N5	j	PAC:26354434	TSS66068	No	NO Cluster	AT3G46970	'2.2.2.2'	'major CHO metabolism.degradation.starch.starch phosphorylase'	'nearly identical (1410)AT3G46970| Symbols: ATPHS2, PHS2 | ATPHS2/PHS2 (ALPHA-GLUCAN PHOSPHORYLASE 2); phosphorylase/ transferase, transferring glycosyl groups | chr3:17312610-17317096 REVERSEnearly identical (1542)PHSH_VICFA no original description'
Glyma18g07480.N6	j	PAC:26354434	TSS66068	No	NO Cluster	AT3G46970	'2.2.2.2'	'major CHO metabolism.degradation.starch.starch phosphorylase'	'nearly identical (1410)AT3G46970| Symbols: ATPHS2, PHS2 | ATPHS2/PHS2 (ALPHA-GLUCAN PHOSPHORYLASE 2); phosphorylase/ transferase, transferring glycosyl groups | chr3:17312610-17317096 REVERSEnearly identical (1542)PHSH_VICFA no original description'
Glyma18g07480.1	=	PAC:26354434	TSS66068	Yes	34	AT3G46970	'2.2.2.2'	'major CHO metabolism.degradation.starch.starch phosphorylase'	'nearly identical (1410)AT3G46970| Symbols: ATPHS2, PHS2 | ATPHS2/PHS2 (ALPHA-GLUCAN PHOSPHORYLASE 2); phosphorylase/ transferase, transferring glycosyl groups | chr3:17312610-17317096 REVERSEnearly identical (1542)PHSH_VICFA no original description'
Glyma18g45446.N3	j	PAC:26356729	TSS69052	No	NO Cluster	NO MapMan Annotation
Glyma18g45446.N5	j	PAC:26356729	TSS69052	No	NO Cluster	NO MapMan Annotation
Glyma18g45446.N4	j	PAC:26356729	TSS69052	No	NO Cluster	NO MapMan Annotation
Glyma18g45446.N9	j	PAC:26356729	TSS69052	Yes	74	NO MapMan Annotation
Glyma18g45446.N7	j	PAC:26356729	TSS69052	No	NO Cluster	NO MapMan Annotation
Glyma18g45446.N8	j	PAC:26356729	TSS69052	No	NO Cluster	NO MapMan Annotation
Glyma18g45446.N6	j	PAC:26356729	TSS69052	No	NO Cluster	NO MapMan Annotation
Glyma18g45446.1	=	PAC:26356729	TSS69052	No	NO Cluster	NO MapMan Annotation
Glyma11g36790.1	=	PAC:26296342	TSS41706	Yes	3	AT3G23670	'31.1'	'cell.organisation'	'highly similar to ( 592)AT3G23670| Symbols: PAKRP1L, KINESIN-12B | KINESIN-12B/PAKRP1L; microtubule motor | chr3:8519297-8525062 FORWARDmoderately similar to ( 225)FLA10_CHLRE no original description'
Glyma11g36790.N4	j	PAC:26296342	TSS41706	No	NO Cluster	AT3G23670	'31.1'	'cell.organisation'	'highly similar to ( 592)AT3G23670| Symbols: PAKRP1L, KINESIN-12B | KINESIN-12B/PAKRP1L; microtubule motor | chr3:8519297-8525062 FORWARDmoderately similar to ( 225)FLA10_CHLRE no original description'
Glyma11g36790.N3	j	PAC:26296342	TSS41706	No	NO Cluster	AT3G23670	'31.1'	'cell.organisation'	'highly similar to ( 592)AT3G23670| Symbols: PAKRP1L, KINESIN-12B | KINESIN-12B/PAKRP1L; microtubule motor | chr3:8519297-8525062 FORWARDmoderately similar to ( 225)FLA10_CHLRE no original description'
Glyma11g36790.N2	j	PAC:26296342	TSS41706	No	NO Cluster	AT3G23670	'31.1'	'cell.organisation'	'highly similar to ( 592)AT3G23670| Symbols: PAKRP1L, KINESIN-12B | KINESIN-12B/PAKRP1L; microtubule motor | chr3:8519297-8525062 FORWARDmoderately similar to ( 225)FLA10_CHLRE no original description'
Glyma11g36790.N6	x	PAC:26296342	TSS43485	No	NO Cluster	AT3G23670	'31.1'	'cell.organisation'	'highly similar to ( 592)AT3G23670| Symbols: PAKRP1L, KINESIN-12B | KINESIN-12B/PAKRP1L; microtubule motor | chr3:8519297-8525062 FORWARDmoderately similar to ( 225)FLA10_CHLRE no original description'
Glyma11g36790.N5	x	PAC:26296342	TSS43484	No	NO Cluster	AT3G23670	'31.1'	'cell.organisation'	'highly similar to ( 592)AT3G23670| Symbols: PAKRP1L, KINESIN-12B | KINESIN-12B/PAKRP1L; microtubule motor | chr3:8519297-8525062 FORWARDmoderately similar to ( 225)FLA10_CHLRE no original description'
Glyma09g05110.1	=	PAC:26343197	TSS32064	Yes	105	AT5G48970	'34.9'	'transport.metabolite transporters at the mitochondrial membrane'	'highly similar to ( 513)AT5G48970| Symbols: | mitochondrial substrate carrier family protein | chr5:19874254-19876600 REVERSEweakly similar to ( 114)BT1_MAIZE no original description'
Glyma09g05110.N2	j	PAC:26343197	TSS32064	No	NO Cluster	AT5G48970	'34.9'	'transport.metabolite transporters at the mitochondrial membrane'	'highly similar to ( 513)AT5G48970| Symbols: | mitochondrial substrate carrier family protein | chr5:19874254-19876600 REVERSEweakly similar to ( 114)BT1_MAIZE no original description'
Glyma09g05110.N5	j	PAC:26343197	TSS32064	No	NO Cluster	AT5G48970	'34.9'	'transport.metabolite transporters at the mitochondrial membrane'	'highly similar to ( 513)AT5G48970| Symbols: | mitochondrial substrate carrier family protein | chr5:19874254-19876600 REVERSEweakly similar to ( 114)BT1_MAIZE no original description'
Glyma09g05110.N6	j	PAC:26343197	TSS32064	No	NO Cluster	AT5G48970	'34.9'	'transport.metabolite transporters at the mitochondrial membrane'	'highly similar to ( 513)AT5G48970| Symbols: | mitochondrial substrate carrier family protein | chr5:19874254-19876600 REVERSEweakly similar to ( 114)BT1_MAIZE no original description'
Glyma09g05110.N3	j	PAC:26343197	TSS32064	No	NO Cluster	AT5G48970	'34.9'	'transport.metabolite transporters at the mitochondrial membrane'	'highly similar to ( 513)AT5G48970| Symbols: | mitochondrial substrate carrier family protein | chr5:19874254-19876600 REVERSEweakly similar to ( 114)BT1_MAIZE no original description'
Glyma09g05110.N4	j	PAC:26343197	TSS32064	No	NO Cluster	AT5G48970	'34.9'	'transport.metabolite transporters at the mitochondrial membrane'	'highly similar to ( 513)AT5G48970| Symbols: | mitochondrial substrate carrier family protein | chr5:19874254-19876600 REVERSEweakly similar to ( 114)BT1_MAIZE no original description'
Glyma08g03141.N5	j	PAC:26310255	TSS29440	No	NO Cluster	NO MapMan Annotation
Glyma08g03141.N11	j	PAC:26310255	TSS29440	No	NO Cluster	NO MapMan Annotation
Glyma08g03141.N3	j	PAC:26310255	TSS29440	No	NO Cluster	NO MapMan Annotation
Glyma08g03141.N4	j	PAC:26310255	TSS29440	No	NO Cluster	NO MapMan Annotation
Glyma08g03141.N10	j	PAC:26310255	TSS29440	No	NO Cluster	NO MapMan Annotation
Glyma08g03141.N8	j	PAC:26310255	TSS29440	No	NO Cluster	NO MapMan Annotation
Glyma08g03141.N9	j	PAC:26310255	TSS29440	No	NO Cluster	NO MapMan Annotation
Glyma08g03141.2	=	PAC:26310255	TSS29440	Yes	73	NO MapMan Annotation
Glyma08g03141.N12	j	PAC:26310255	TSS29440	No	NO Cluster	NO MapMan Annotation
Glyma08g03141.1	=	PAC:26310254	TSS29440	No	NO Cluster	NO MapMan Annotation
Glyma08g03141.N7	j	PAC:26310255	TSS29440	No	NO Cluster	NO MapMan Annotation
Glyma08g03141.N6	j	PAC:26310255	TSS29440	No	NO Cluster	NO MapMan Annotation
Glyma17g15330.1	=	PAC:26313344	TSS64837	Yes	70	AT5G47390	'27.3.26'	'RNA.regulation of transcription.MYB-related transcription factor family'	'moderately similar to ( 363)AT5G47390| Symbols: | myb family transcription factor | chr5:19244228-19245773 FORWARD no original description'
Glyma17g15330.N4	j	PAC:26313344	TSS64837	No	NO Cluster	AT5G47390	'27.3.26'	'RNA.regulation of transcription.MYB-related transcription factor family'	'moderately similar to ( 363)AT5G47390| Symbols: | myb family transcription factor | chr5:19244228-19245773 FORWARD no original description'
Glyma17g15330.N3	j	PAC:26313344	TSS64836	No	NO Cluster	AT5G47390	'27.3.26'	'RNA.regulation of transcription.MYB-related transcription factor family'	'moderately similar to ( 363)AT5G47390| Symbols: | myb family transcription factor | chr5:19244228-19245773 FORWARD no original description'
Glyma17g15330.N2	j	PAC:26313344	TSS64835	No	NO Cluster	AT5G47390	'27.3.26'	'RNA.regulation of transcription.MYB-related transcription factor family'	'moderately similar to ( 363)AT5G47390| Symbols: | myb family transcription factor | chr5:19244228-19245773 FORWARD no original description'
Glyma16g07350.1	=	PAC:26352370	TSS60885	Yes	29	AT5G60390	'29.2.4'	'protein.synthesis.elongation'	'highly similar to ( 867)AT5G60390| Symbols: | elongation factor 1-alpha / EF-1-alpha | chr5:24306452-24307901 FORWARDhighly similar to ( 874)EF1A_TOBAC no original description'
Glyma16g07350.N2	j	PAC:26352370	TSS60884	No	NO Cluster	AT5G60390	'29.2.4'	'protein.synthesis.elongation'	'highly similar to ( 867)AT5G60390| Symbols: | elongation factor 1-alpha / EF-1-alpha | chr5:24306452-24307901 FORWARDhighly similar to ( 874)EF1A_TOBAC no original description'
Glyma06g07200.N2	j	PAC:26302377	TSS21011	No	NO Cluster	AT2G25490	'29.5.11.4.3.2'	'protein.degradation.ubiquitin.E3.SCF.FBOX'	'highly similar to ( 692)AT2G25490| Symbols: FBL6, EBF1 | EBF1 (EIN3-BINDING F BOX PROTEIN 1); ubiquitin-protein ligase | chr2:10855096-10857353 REVERSE no original description'
Glyma06g07200.1	=	PAC:26302377	TSS21011	Yes	24	AT2G25490	'29.5.11.4.3.2'	'protein.degradation.ubiquitin.E3.SCF.FBOX'	'highly similar to ( 692)AT2G25490| Symbols: FBL6, EBF1 | EBF1 (EIN3-BINDING F BOX PROTEIN 1); ubiquitin-protein ligase | chr2:10855096-10857353 REVERSE no original description'
Glyma17g02840.N8	j	PAC:26311673	TSS64011	No	NO Cluster	AT5G48970	'34.9'	'transport.metabolite transporters at the mitochondrial membrane'	'highly similar to ( 540)AT5G48970| Symbols: | mitochondrial substrate carrier family protein | chr5:19874254-19876600 REVERSEweakly similar to ( 128)BT1_MAIZE no original description'
Glyma17g02840.N7	j	PAC:26311673	TSS64011	No	NO Cluster	AT5G48970	'34.9'	'transport.metabolite transporters at the mitochondrial membrane'	'highly similar to ( 540)AT5G48970| Symbols: | mitochondrial substrate carrier family protein | chr5:19874254-19876600 REVERSEweakly similar to ( 128)BT1_MAIZE no original description'
Glyma17g02840.N6	j	PAC:26311673	TSS64011	No	NO Cluster	AT5G48970	'34.9'	'transport.metabolite transporters at the mitochondrial membrane'	'highly similar to ( 540)AT5G48970| Symbols: | mitochondrial substrate carrier family protein | chr5:19874254-19876600 REVERSEweakly similar to ( 128)BT1_MAIZE no original description'
Glyma17g02840.N5	j	PAC:26311673	TSS64010	No	NO Cluster	AT5G48970	'34.9'	'transport.metabolite transporters at the mitochondrial membrane'	'highly similar to ( 540)AT5G48970| Symbols: | mitochondrial substrate carrier family protein | chr5:19874254-19876600 REVERSEweakly similar to ( 128)BT1_MAIZE no original description'
Glyma17g02840.N10	j	PAC:26311673	TSS64011	No	NO Cluster	AT5G48970	'34.9'	'transport.metabolite transporters at the mitochondrial membrane'	'highly similar to ( 540)AT5G48970| Symbols: | mitochondrial substrate carrier family protein | chr5:19874254-19876600 REVERSEweakly similar to ( 128)BT1_MAIZE no original description'
Glyma17g02840.N9	j	PAC:26311673	TSS64011	No	NO Cluster	AT5G48970	'34.9'	'transport.metabolite transporters at the mitochondrial membrane'	'highly similar to ( 540)AT5G48970| Symbols: | mitochondrial substrate carrier family protein | chr5:19874254-19876600 REVERSEweakly similar to ( 128)BT1_MAIZE no original description'
Glyma17g02840.3	=	PAC:26311673	TSS64011	Yes	70	AT5G48970	'34.9'	'transport.metabolite transporters at the mitochondrial membrane'	'highly similar to ( 540)AT5G48970| Symbols: | mitochondrial substrate carrier family protein | chr5:19874254-19876600 REVERSEweakly similar to ( 128)BT1_MAIZE no original description'
Glyma17g02840.4	=	PAC:26311674	TSS64011	No	NO Cluster	AT5G48970	'34.9'	'transport.metabolite transporters at the mitochondrial membrane'	'highly similar to ( 540)AT5G48970| Symbols: | mitochondrial substrate carrier family protein | chr5:19874254-19876600 REVERSEweakly similar to ( 128)BT1_MAIZE no original description'
Glyma13g00860.N2	j	PAC:26316110	TSS46898	No	NO Cluster	AT5G57360	'29.5.11.4.3.2'	'protein.degradation.ubiquitin.E3.SCF.FBOX'	'highly similar to ( 974)AT5G57360| Symbols: LKP1, ADO1, FKL2, ZTL | ZTL (ZEITLUPE); ubiquitin-protein ligase | chr5:23258823-23261482 FORWARDhighly similar to ( 890)ADO1_ORYSA no original description'
Glyma13g00860.1	=	PAC:26316110	TSS46899	Yes	70	AT5G57360	'29.5.11.4.3.2'	'protein.degradation.ubiquitin.E3.SCF.FBOX'	'highly similar to ( 974)AT5G57360| Symbols: LKP1, ADO1, FKL2, ZTL | ZTL (ZEITLUPE); ubiquitin-protein ligase | chr5:23258823-23261482 FORWARDhighly similar to ( 890)ADO1_ORYSA no original description'
Glyma13g00860.N3	x	PAC:26316110	TSS49464	No	NO Cluster	AT5G57360	'29.5.11.4.3.2'	'protein.degradation.ubiquitin.E3.SCF.FBOX'	'highly similar to ( 974)AT5G57360| Symbols: LKP1, ADO1, FKL2, ZTL | ZTL (ZEITLUPE); ubiquitin-protein ligase | chr5:23258823-23261482 FORWARDhighly similar to ( 890)ADO1_ORYSA no original description'
Glyma17g14060.1	=	PAC:26313826	TSS62869	Yes	63	AT1G12710	'31.1'	'cell.organisation'	'moderately similar to ( 379)AT1G12710| Symbols: ATPP2-A12 | ATPP2-A12 (PHLOEM PROTEIN 2-A12); carbohydrate binding | chr1:4326978-4328322 REVERSE no original description'
Glyma17g14060.N2	j	PAC:26313826	TSS62869	No	NO Cluster	AT1G12710	'31.1'	'cell.organisation'	'moderately similar to ( 379)AT1G12710| Symbols: ATPP2-A12 | ATPP2-A12 (PHLOEM PROTEIN 2-A12); carbohydrate binding | chr1:4326978-4328322 REVERSE no original description'
Glyma08g14620.2	=	PAC:26306542	TSS30141	Yes	9	AT4G39790	'27.3.35'	'RNA.regulation of transcription.bZIP transcription factor family'	'moderately similar to ( 462)AT4G39790| Symbols: | similar to unknown protein [Arabidopsis thaliana] (TAIR:AT2G27090.1); similar to unnamed protein product [Vitis vinifera] (GB:CAO49895.1); contains InterPro domain Protein of unknown function DUF632 (InterPro:IPR006867); contains InterPro domain Protein of unknown function DUF630 (InterPro:IPR006868) | chr4:18462310-18464578 REVERSE no original d…
Glyma08g14620.N9	j	PAC:26306543	TSS30141	No	NO Cluster	AT4G39790	'27.3.35'	'RNA.regulation of transcription.bZIP transcription factor family'	'moderately similar to ( 462)AT4G39790| Symbols: | similar to unknown protein [Arabidopsis thaliana] (TAIR:AT2G27090.1); similar to unnamed protein product [Vitis vinifera] (GB:CAO49895.1); contains InterPro domain Protein of unknown function DUF632 (InterPro:IPR006867); contains InterPro domain Protein of unknown function DUF630 (InterPro:IPR006868) | chr4:18462310-18464578 REVERSE no original d…
Glyma08g14620.3	=	PAC:26306543	TSS30141	No	NO Cluster	AT4G39790	'27.3.35'	'RNA.regulation of transcription.bZIP transcription factor family'	'moderately similar to ( 462)AT4G39790| Symbols: | similar to unknown protein [Arabidopsis thaliana] (TAIR:AT2G27090.1); similar to unnamed protein product [Vitis vinifera] (GB:CAO49895.1); contains InterPro domain Protein of unknown function DUF632 (InterPro:IPR006867); contains InterPro domain Protein of unknown function DUF630 (InterPro:IPR006868) | chr4:18462310-18464578 REVERSE no original d…
Glyma08g14620.N7	j	PAC:26306543	TSS30141	No	NO Cluster	AT4G39790	'27.3.35'	'RNA.regulation of transcription.bZIP transcription factor family'	'moderately similar to ( 462)AT4G39790| Symbols: | similar to unknown protein [Arabidopsis thaliana] (TAIR:AT2G27090.1); similar to unnamed protein product [Vitis vinifera] (GB:CAO49895.1); contains InterPro domain Protein of unknown function DUF632 (InterPro:IPR006867); contains InterPro domain Protein of unknown function DUF630 (InterPro:IPR006868) | chr4:18462310-18464578 REVERSE no original d…
Glyma08g14620.N8	j	PAC:26306543	TSS30141	No	NO Cluster	AT4G39790	'27.3.35'	'RNA.regulation of transcription.bZIP transcription factor family'	'moderately similar to ( 462)AT4G39790| Symbols: | similar to unknown protein [Arabidopsis thaliana] (TAIR:AT2G27090.1); similar to unnamed protein product [Vitis vinifera] (GB:CAO49895.1); contains InterPro domain Protein of unknown function DUF632 (InterPro:IPR006867); contains InterPro domain Protein of unknown function DUF630 (InterPro:IPR006868) | chr4:18462310-18464578 REVERSE no original d…
Glyma08g14620.N6	j	PAC:26306543	TSS30141	No	NO Cluster	AT4G39790	'27.3.35'	'RNA.regulation of transcription.bZIP transcription factor family'	'moderately similar to ( 462)AT4G39790| Symbols: | similar to unknown protein [Arabidopsis thaliana] (TAIR:AT2G27090.1); similar to unnamed protein product [Vitis vinifera] (GB:CAO49895.1); contains InterPro domain Protein of unknown function DUF632 (InterPro:IPR006867); contains InterPro domain Protein of unknown function DUF630 (InterPro:IPR006868) | chr4:18462310-18464578 REVERSE no original d…
Glyma08g14620.N5	x	PAC:26306543	TSS27562	No	NO Cluster	AT4G39790	'27.3.35'	'RNA.regulation of transcription.bZIP transcription factor family'	'moderately similar to ( 462)AT4G39790| Symbols: | similar to unknown protein [Arabidopsis thaliana] (TAIR:AT2G27090.1); similar to unnamed protein product [Vitis vinifera] (GB:CAO49895.1); contains InterPro domain Protein of unknown function DUF632 (InterPro:IPR006867); contains InterPro domain Protein of unknown function DUF630 (InterPro:IPR006868) | chr4:18462310-18464578 REVERSE no original d…
Glyma08g14620.N4	x	PAC:26306543	TSS27562	No	NO Cluster	AT4G39790	'27.3.35'	'RNA.regulation of transcription.bZIP transcription factor family'	'moderately similar to ( 462)AT4G39790| Symbols: | similar to unknown protein [Arabidopsis thaliana] (TAIR:AT2G27090.1); similar to unnamed protein product [Vitis vinifera] (GB:CAO49895.1); contains InterPro domain Protein of unknown function DUF632 (InterPro:IPR006867); contains InterPro domain Protein of unknown function DUF630 (InterPro:IPR006868) | chr4:18462310-18464578 REVERSE no original d…
Glyma02g47120.N2	j	PAC:26289963	TSS7419	No	NO Cluster	AT4G37000	'20.1'	'stress.biotic'	'moderately similar to ( 275)AT4G37000| Symbols: ATRCCR, ACD2 | ACD2 (ACCELERATED CELL DEATH 2) | chr4:17442621-17443756 FORWARDweakly similar to ( 197)RCCR_HORVU no original description'
Glyma02g47120.N3	j	PAC:26289963	TSS7419	No	NO Cluster	AT4G37000	'20.1'	'stress.biotic'	'moderately similar to ( 275)AT4G37000| Symbols: ATRCCR, ACD2 | ACD2 (ACCELERATED CELL DEATH 2) | chr4:17442621-17443756 FORWARDweakly similar to ( 197)RCCR_HORVU no original description'
Glyma02g47120.1	=	PAC:26289963	TSS7419	Yes	65	AT4G37000	'20.1'	'stress.biotic'	'moderately similar to ( 275)AT4G37000| Symbols: ATRCCR, ACD2 | ACD2 (ACCELERATED CELL DEATH 2) | chr4:17442621-17443756 FORWARDweakly similar to ( 197)RCCR_HORVU no original description'
Glyma15g01880.N5	j	PAC:26332620	TSS57137	No	NO Cluster	AT3G16110	'21.1'	'redox.thioredoxin'	'highly similar to ( 591)AT3G16110| Symbols: ATPDIL1-6 | ATPDIL1-6 (PDI-LIKE 1-6); thiol-disulfide exchange intermediate | chr3:5460961-5463672 REVERSEweakly similar to ( 163)PDI_RICCO no original description'
Glyma15g01880.N3	j	PAC:26332620	TSS57137	No	NO Cluster	AT3G16110	'21.1'	'redox.thioredoxin'	'highly similar to ( 591)AT3G16110| Symbols: ATPDIL1-6 | ATPDIL1-6 (PDI-LIKE 1-6); thiol-disulfide exchange intermediate | chr3:5460961-5463672 REVERSEweakly similar to ( 163)PDI_RICCO no original description'
Glyma15g01880.N4	j	PAC:26332620	TSS57137	No	NO Cluster	AT3G16110	'21.1'	'redox.thioredoxin'	'highly similar to ( 591)AT3G16110| Symbols: ATPDIL1-6 | ATPDIL1-6 (PDI-LIKE 1-6); thiol-disulfide exchange intermediate | chr3:5460961-5463672 REVERSEweakly similar to ( 163)PDI_RICCO no original description'
Glyma15g01880.N2	j	PAC:26332620	TSS57137	No	NO Cluster	AT3G16110	'21.1'	'redox.thioredoxin'	'highly similar to ( 591)AT3G16110| Symbols: ATPDIL1-6 | ATPDIL1-6 (PDI-LIKE 1-6); thiol-disulfide exchange intermediate | chr3:5460961-5463672 REVERSEweakly similar to ( 163)PDI_RICCO no original description'
Glyma15g01880.1	=	PAC:26332620	TSS57137	Yes	25	AT3G16110	'21.1'	'redox.thioredoxin'	'highly similar to ( 591)AT3G16110| Symbols: ATPDIL1-6 | ATPDIL1-6 (PDI-LIKE 1-6); thiol-disulfide exchange intermediate | chr3:5460961-5463672 REVERSEweakly similar to ( 163)PDI_RICCO no original description'
Glyma15g01880.N6	j	PAC:26332620	TSS57137	No	NO Cluster	AT3G16110	'21.1'	'redox.thioredoxin'	'highly similar to ( 591)AT3G16110| Symbols: ATPDIL1-6 | ATPDIL1-6 (PDI-LIKE 1-6); thiol-disulfide exchange intermediate | chr3:5460961-5463672 REVERSEweakly similar to ( 163)PDI_RICCO no original description'
Glyma18g02920.N3	x	PAC:26356867	TSS67778	No	NO Cluster	AT3G11110	'29.5.11.4.2'	'protein.degradation.ubiquitin.E3.RING'	'weakly similar to ( 114)AT3G11110| Symbols: | zinc finger (C3HC4-type RING finger) family protein | chr3:3479985-3480461 FORWARD no original description'
Glyma18g02920.1	=	PAC:26356867	TSS65790	Yes	90	AT3G11110	'29.5.11.4.2'	'protein.degradation.ubiquitin.E3.RING'	'weakly similar to ( 114)AT3G11110| Symbols: | zinc finger (C3HC4-type RING finger) family protein | chr3:3479985-3480461 FORWARD no original description'
Glyma18g02920.2	=	PAC:26356868	TSS65790	No	NO Cluster	AT3G11110	'29.5.11.4.2'	'protein.degradation.ubiquitin.E3.RING'	'weakly similar to ( 114)AT3G11110| Symbols: | zinc finger (C3HC4-type RING finger) family protein | chr3:3479985-3480461 FORWARD no original description'
Glyma14g05860.N2	j	PAC:26285970	TSS53916	No	NO Cluster	No Arabidopsis Homolohue	'35.2'	'not assigned.unknown'	'no original description'
Glyma14g05860.1	=	PAC:26285970	TSS53916	Yes	70	No Arabidopsis Homolohue	'35.2'	'not assigned.unknown'	'no original description'
Glyma18g12660.N4	j	PAC:26355977	TSS68292	No	NO Cluster	AT1G78570	'10.1.10'	'cell wall.precursor synthesis.RHM'	'highly similar to ( 919)AT1G78570| Symbols: RHM1, ROL1 | RHM1/ROL1 (RHAMNOSE BIOSYNTHESIS1); UDP-L-rhamnose synthase/ UDP-glucose 4,6-dehydratase/ catalytic | chr1:29555003-29557100 FORWARDweakly similar to ( 104)ARAE2_ORYSA no original description'
Glyma18g12660.N5	j	PAC:26355977	TSS68293	No	NO Cluster	AT1G78570	'10.1.10'	'cell wall.precursor synthesis.RHM'	'highly similar to ( 919)AT1G78570| Symbols: RHM1, ROL1 | RHM1/ROL1 (RHAMNOSE BIOSYNTHESIS1); UDP-L-rhamnose synthase/ UDP-glucose 4,6-dehydratase/ catalytic | chr1:29555003-29557100 FORWARDweakly similar to ( 104)ARAE2_ORYSA no original description'
Glyma18g12660.N6	j	PAC:26355977	TSS68293	No	NO Cluster	AT1G78570	'10.1.10'	'cell wall.precursor synthesis.RHM'	'highly similar to ( 919)AT1G78570| Symbols: RHM1, ROL1 | RHM1/ROL1 (RHAMNOSE BIOSYNTHESIS1); UDP-L-rhamnose synthase/ UDP-glucose 4,6-dehydratase/ catalytic | chr1:29555003-29557100 FORWARDweakly similar to ( 104)ARAE2_ORYSA no original description'
Glyma18g12660.2	=	PAC:26355975	TSS68293	Yes	27	AT1G78570	'10.1.10'	'cell wall.precursor synthesis.RHM'	'highly similar to ( 919)AT1G78570| Symbols: RHM1, ROL1 | RHM1/ROL1 (RHAMNOSE BIOSYNTHESIS1); UDP-L-rhamnose synthase/ UDP-glucose 4,6-dehydratase/ catalytic | chr1:29555003-29557100 FORWARDweakly similar to ( 104)ARAE2_ORYSA no original description'
Glyma18g12660.3	=	PAC:26355976	TSS68293	No	NO Cluster	AT1G78570	'10.1.10'	'cell wall.precursor synthesis.RHM'	'highly similar to ( 919)AT1G78570| Symbols: RHM1, ROL1 | RHM1/ROL1 (RHAMNOSE BIOSYNTHESIS1); UDP-L-rhamnose synthase/ UDP-glucose 4,6-dehydratase/ catalytic | chr1:29555003-29557100 FORWARDweakly similar to ( 104)ARAE2_ORYSA no original description'
Glyma18g12660.1	=	PAC:26355977	TSS68293	No	NO Cluster	AT1G78570	'10.1.10'	'cell wall.precursor synthesis.RHM'	'highly similar to ( 919)AT1G78570| Symbols: RHM1, ROL1 | RHM1/ROL1 (RHAMNOSE BIOSYNTHESIS1); UDP-L-rhamnose synthase/ UDP-glucose 4,6-dehydratase/ catalytic | chr1:29555003-29557100 FORWARDweakly similar to ( 104)ARAE2_ORYSA no original description'
Glyma19g37700.N4	j	PAC:26326265	TSS72730	No	NO Cluster	AT2G36410	'28.1'	'DNA.synthesis/chromatin structure'	'weakly similar to ( 132)AT2G36410| Symbols: | similar to hematopoietin/interferon-class (D200-domain) cytokine receptor binding [Arabidopsis thaliana] (TAIR:AT3G52920.2); similar to unknown [Populus trichocarpa] (GB:ABK93998.1); contains InterPro domain Protein of unknown function DUF662 (InterPro:IPR007033) | chr2:15286120-15287349 FORWARD no original description'
Glyma19g37700.1	=	PAC:26326265	TSS72730	No	NO Cluster	AT2G36410	'28.1'	'DNA.synthesis/chromatin structure'	'weakly similar to ( 132)AT2G36410| Symbols: | similar to hematopoietin/interferon-class (D200-domain) cytokine receptor binding [Arabidopsis thaliana] (TAIR:AT3G52920.2); similar to unknown [Populus trichocarpa] (GB:ABK93998.1); contains InterPro domain Protein of unknown function DUF662 (InterPro:IPR007033) | chr2:15286120-15287349 FORWARD no original description'
Glyma19g37700.2	=	PAC:26326266	TSS72730	Yes	21	AT2G36410	'28.1'	'DNA.synthesis/chromatin structure'	'weakly similar to ( 132)AT2G36410| Symbols: | similar to hematopoietin/interferon-class (D200-domain) cytokine receptor binding [Arabidopsis thaliana] (TAIR:AT3G52920.2); similar to unknown [Populus trichocarpa] (GB:ABK93998.1); contains InterPro domain Protein of unknown function DUF662 (InterPro:IPR007033) | chr2:15286120-15287349 FORWARD no original description'
Glyma19g37700.3	=	PAC:26326267	TSS72730	No	NO Cluster	AT2G36410	'28.1'	'DNA.synthesis/chromatin structure'	'weakly similar to ( 132)AT2G36410| Symbols: | similar to hematopoietin/interferon-class (D200-domain) cytokine receptor binding [Arabidopsis thaliana] (TAIR:AT3G52920.2); similar to unknown [Populus trichocarpa] (GB:ABK93998.1); contains InterPro domain Protein of unknown function DUF662 (InterPro:IPR007033) | chr2:15286120-15287349 FORWARD no original description'
Glyma02g06360.1	=	PAC:26287491	TSS3719	Yes	23	AT5G49560	'35.2'	'not assigned.unknown'	'moderately similar to ( 281)AT5G49560| Symbols: | similar to unknown protein [Arabidopsis thaliana] (TAIR:AT3G50850.1); similar to unknown [Picea sitchensis] (GB:ABK22976.1); contains domain SSF53335 (SSF53335); contains domain PTHR14614 (PTHR14614) | chr5:20128187-20129011 REVERSE no original description'
Glyma02g06360.N2	x	PAC:26287491	TSS5743	No	NO Cluster	AT5G49560	'35.2'	'not assigned.unknown'	'moderately similar to ( 281)AT5G49560| Symbols: | similar to unknown protein [Arabidopsis thaliana] (TAIR:AT3G50850.1); similar to unknown [Picea sitchensis] (GB:ABK22976.1); contains domain SSF53335 (SSF53335); contains domain PTHR14614 (PTHR14614) | chr5:20128187-20129011 REVERSE no original description'
Glyma08g26670.1	=	PAC:26307461	TSS28346	Yes	35	AT5G36110	'26.10'	'misc.cytochrome P450'	'highly similar to ( 558)AT5G36110| Symbols: CYP716A1 | CYP716A1 (cytochrome P450, family 716, subfamily A, polypeptide 1); oxygen binding | chr5:14212607-14214843 FORWARDmoderately similar to ( 204)KAO1_HORVU no original description'
Glyma08g26670.N3	j	PAC:26307461	TSS28346	No	NO Cluster	AT5G36110	'26.10'	'misc.cytochrome P450'	'highly similar to ( 558)AT5G36110| Symbols: CYP716A1 | CYP716A1 (cytochrome P450, family 716, subfamily A, polypeptide 1); oxygen binding | chr5:14212607-14214843 FORWARDmoderately similar to ( 204)KAO1_HORVU no original description'
Glyma08g26670.N2	j	PAC:26307461	TSS28346	No	NO Cluster	AT5G36110	'26.10'	'misc.cytochrome P450'	'highly similar to ( 558)AT5G36110| Symbols: CYP716A1 | CYP716A1 (cytochrome P450, family 716, subfamily A, polypeptide 1); oxygen binding | chr5:14212607-14214843 FORWARDmoderately similar to ( 204)KAO1_HORVU no original description'
Glyma18g08280.1	=	PAC:26354760	TSS68097	Yes	32	AT5G55960	'35.2'	'not assigned.unknown'	'highly similar to ( 830)AT5G55960| Symbols: | similar to unnamed protein product [Vitis vinifera] (GB:CAO45175.1); contains InterPro domain Protein of unknown function UPF0118 (InterPro:IPR002549) | chr5:22679952-22681988 FORWARD no original description'
Glyma18g08280.N2	j	PAC:26354760	TSS68097	No	NO Cluster	AT5G55960	'35.2'	'not assigned.unknown'	'highly similar to ( 830)AT5G55960| Symbols: | similar to unnamed protein product [Vitis vinifera] (GB:CAO45175.1); contains InterPro domain Protein of unknown function UPF0118 (InterPro:IPR002549) | chr5:22679952-22681988 FORWARD no original description'
Glyma15g08790.1	=	PAC:26332344	TSS55694	Yes	15	AT4G18570	'35.2'	'not assigned.unknown'	'moderately similar to ( 358)AT4G18570| Symbols: | proline-rich family protein | chr4:10231450-10234545 FORWARD no original description'
Glyma15g08790.N4	j	PAC:26332344	TSS55694	No	NO Cluster	AT4G18570	'35.2'	'not assigned.unknown'	'moderately similar to ( 358)AT4G18570| Symbols: | proline-rich family protein | chr4:10231450-10234545 FORWARD no original description'
Glyma15g08790.N3	j	PAC:26332344	TSS55694	No	NO Cluster	AT4G18570	'35.2'	'not assigned.unknown'	'moderately similar to ( 358)AT4G18570| Symbols: | proline-rich family protein | chr4:10231450-10234545 FORWARD no original description'
Glyma15g08790.N2	j	PAC:26332344	TSS55694	No	NO Cluster	AT4G18570	'35.2'	'not assigned.unknown'	'moderately similar to ( 358)AT4G18570| Symbols: | proline-rich family protein | chr4:10231450-10234545 FORWARD no original description'
Glyma05g21880.N5	j	PAC:26320009	TSS17185	No	NO Cluster	AT4G37460	'35.2'	'not assigned.unknown'	'nearly identical (1274)AT4G37460| Symbols: | binding | chr4:17608617-17615528 REVERSE no original description'
Glyma05g21880.N4	j	PAC:26320009	TSS17185	No	NO Cluster	AT4G37460	'35.2'	'not assigned.unknown'	'nearly identical (1274)AT4G37460| Symbols: | binding | chr4:17608617-17615528 REVERSE no original description'
Glyma05g21880.N7	j	PAC:26320009	TSS17185	No	NO Cluster	AT4G37460	'35.2'	'not assigned.unknown'	'nearly identical (1274)AT4G37460| Symbols: | binding | chr4:17608617-17615528 REVERSE no original description'
Glyma05g21880.N6	j	PAC:26320009	TSS17185	No	NO Cluster	AT4G37460	'35.2'	'not assigned.unknown'	'nearly identical (1274)AT4G37460| Symbols: | binding | chr4:17608617-17615528 REVERSE no original description'
Glyma05g21880.N8	j	PAC:26320009	TSS17185	No	NO Cluster	AT4G37460	'35.2'	'not assigned.unknown'	'nearly identical (1274)AT4G37460| Symbols: | binding | chr4:17608617-17615528 REVERSE no original description'
Glyma05g21880.1	=	PAC:26320009	TSS17185	Yes	77	AT4G37460	'35.2'	'not assigned.unknown'	'nearly identical (1274)AT4G37460| Symbols: | binding | chr4:17608617-17615528 REVERSE no original description'
Glyma05g21880.N2	j	PAC:26320009	TSS17185	No	NO Cluster	AT4G37460	'35.2'	'not assigned.unknown'	'nearly identical (1274)AT4G37460| Symbols: | binding | chr4:17608617-17615528 REVERSE no original description'
Glyma05g21880.N3	j	PAC:26320009	TSS17185	No	NO Cluster	AT4G37460	'35.2'	'not assigned.unknown'	'nearly identical (1274)AT4G37460| Symbols: | binding | chr4:17608617-17615528 REVERSE no original description'
Glyma04g09510.N3	j	PAC:26304384	TSS13603	No	NO Cluster	AT4G37870	'6.4'	'gluconeogenese/ glyoxylate cycle.PEPCK'	'nearly identical (1015)AT4G37870| Symbols: PCK1, PEPCK | PCK1/PEPCK (PHOSPHOENOLPYRUVATE CARBOXYKINASE 1); ATP binding / phosphoenolpyruvate carboxykinase (ATP) | chr4:17802968-17806326 REVERSEhighly similar to ( 988)PEPCK_CUCSA no original description'
Glyma04g09510.N2	j	PAC:26304384	TSS13603	No	NO Cluster	AT4G37870	'6.4'	'gluconeogenese/ glyoxylate cycle.PEPCK'	'nearly identical (1015)AT4G37870| Symbols: PCK1, PEPCK | PCK1/PEPCK (PHOSPHOENOLPYRUVATE CARBOXYKINASE 1); ATP binding / phosphoenolpyruvate carboxykinase (ATP) | chr4:17802968-17806326 REVERSEhighly similar to ( 988)PEPCK_CUCSA no original description'
Glyma04g09510.1	=	PAC:26304384	TSS13603	Yes	19	AT4G37870	'6.4'	'gluconeogenese/ glyoxylate cycle.PEPCK'	'nearly identical (1015)AT4G37870| Symbols: PCK1, PEPCK | PCK1/PEPCK (PHOSPHOENOLPYRUVATE CARBOXYKINASE 1); ATP binding / phosphoenolpyruvate carboxykinase (ATP) | chr4:17802968-17806326 REVERSEhighly similar to ( 988)PEPCK_CUCSA no original description'
Glyma04g09510.N4	j	PAC:26304384	TSS13603	No	NO Cluster	AT4G37870	'6.4'	'gluconeogenese/ glyoxylate cycle.PEPCK'	'nearly identical (1015)AT4G37870| Symbols: PCK1, PEPCK | PCK1/PEPCK (PHOSPHOENOLPYRUVATE CARBOXYKINASE 1); ATP binding / phosphoenolpyruvate carboxykinase (ATP) | chr4:17802968-17806326 REVERSEhighly similar to ( 988)PEPCK_CUCSA no original description'
Glyma19g04210.1	=	PAC:26327245	TSS69903	Yes	30	AT5G60920	'10.2'	'cell wall.cellulose synthesis'	'highly similar to ( 662)AT5G60920| Symbols: COB | COB (COBRA) | chr5:24528692-24531158 REVERSEhighly similar to ( 643)COBL3_ORYSA no original description'
Glyma19g04210.N2	j	PAC:26327245	TSS69903	No	NO Cluster	AT5G60920	'10.2'	'cell wall.cellulose synthesis'	'highly similar to ( 662)AT5G60920| Symbols: COB | COB (COBRA) | chr5:24528692-24531158 REVERSEhighly similar to ( 643)COBL3_ORYSA no original description'
Glyma02g45870.4	=	PAC:26290285	TSS7327	No	NO Cluster	AT5G54840	'30.5'	'signalling.G-proteins'	'moderately similar to ( 334)AT5G54840| Symbols: | GTP-binding family protein | chr5:22294587-22295554 REVERSE no original description'
Glyma02g45870.5	=	PAC:26290286	TSS7327	No	NO Cluster	AT5G54840	'30.5'	'signalling.G-proteins'	'moderately similar to ( 334)AT5G54840| Symbols: | GTP-binding family protein | chr5:22294587-22295554 REVERSE no original description'
Glyma02g45870.N6	j	PAC:26290285	TSS7327	No	NO Cluster	AT5G54840	'30.5'	'signalling.G-proteins'	'moderately similar to ( 334)AT5G54840| Symbols: | GTP-binding family protein | chr5:22294587-22295554 REVERSE no original description'
Glyma02g45870.1	=	PAC:26290284	TSS7327	Yes	96	AT5G54840	'30.5'	'signalling.G-proteins'	'moderately similar to ( 334)AT5G54840| Symbols: | GTP-binding family protein | chr5:22294587-22295554 REVERSE no original description'
Glyma05g36400.1	=	PAC:26322246	TSS16356	Yes	12	AT3G10670	'29.8'	'protein.assembly and cofactor ligation'	'moderately similar to ( 357)AT3G10670| Symbols: ATNAP7 | ATNAP7 (Arabidopsis thaliana non-intrinsic ABC protein 7) | chr3:3335330-3337309 REVERSE no original description'
Glyma05g36400.N6	j	PAC:26322246	TSS16356	No	NO Cluster	AT3G10670	'29.8'	'protein.assembly and cofactor ligation'	'moderately similar to ( 357)AT3G10670| Symbols: ATNAP7 | ATNAP7 (Arabidopsis thaliana non-intrinsic ABC protein 7) | chr3:3335330-3337309 REVERSE no original description'
Glyma05g36400.N2	j	PAC:26322246	TSS16356	No	NO Cluster	AT3G10670	'29.8'	'protein.assembly and cofactor ligation'	'moderately similar to ( 357)AT3G10670| Symbols: ATNAP7 | ATNAP7 (Arabidopsis thaliana non-intrinsic ABC protein 7) | chr3:3335330-3337309 REVERSE no original description'
Glyma05g36400.N3	j	PAC:26322246	TSS16356	No	NO Cluster	AT3G10670	'29.8'	'protein.assembly and cofactor ligation'	'moderately similar to ( 357)AT3G10670| Symbols: ATNAP7 | ATNAP7 (Arabidopsis thaliana non-intrinsic ABC protein 7) | chr3:3335330-3337309 REVERSE no original description'
Glyma05g36400.N4	j	PAC:26322246	TSS16356	No	NO Cluster	AT3G10670	'29.8'	'protein.assembly and cofactor ligation'	'moderately similar to ( 357)AT3G10670| Symbols: ATNAP7 | ATNAP7 (Arabidopsis thaliana non-intrinsic ABC protein 7) | chr3:3335330-3337309 REVERSE no original description'
Glyma05g36400.N5	j	PAC:26322246	TSS16356	No	NO Cluster	AT3G10670	'29.8'	'protein.assembly and cofactor ligation'	'moderately similar to ( 357)AT3G10670| Symbols: ATNAP7 | ATNAP7 (Arabidopsis thaliana non-intrinsic ABC protein 7) | chr3:3335330-3337309 REVERSE no original description'
Glyma05g36400.N7	j	PAC:26322246	TSS16356	No	NO Cluster	AT3G10670	'29.8'	'protein.assembly and cofactor ligation'	'moderately similar to ( 357)AT3G10670| Symbols: ATNAP7 | ATNAP7 (Arabidopsis thaliana non-intrinsic ABC protein 7) | chr3:3335330-3337309 REVERSE no original description'
Glyma15g01080.N3	j	PAC:26330477	TSS57071	Yes	67	AT5G25360	'35.2'	'not assigned.unknown'	'weakly similar to ( 178)AT5G25360| Symbols: | similar to unknown protein [Arabidopsis thaliana] (TAIR:AT4G32342.1); similar to unknown [Populus trichocarpa] (GB:ABK93715.1) | chr5:8799937-8802336 REVERSE no original description'
Glyma15g01080.1	=	PAC:26330477	TSS57071	No	NO Cluster	AT5G25360	'35.2'	'not assigned.unknown'	'weakly similar to ( 178)AT5G25360| Symbols: | similar to unknown protein [Arabidopsis thaliana] (TAIR:AT4G32342.1); similar to unknown [Populus trichocarpa] (GB:ABK93715.1) | chr5:8799937-8802336 REVERSE no original description'
Glyma15g01080.N2	j	PAC:26330477	TSS57071	No	NO Cluster	AT5G25360	'35.2'	'not assigned.unknown'	'weakly similar to ( 178)AT5G25360| Symbols: | similar to unknown protein [Arabidopsis thaliana] (TAIR:AT4G32342.1); similar to unknown [Populus trichocarpa] (GB:ABK93715.1) | chr5:8799937-8802336 REVERSE no original description'
Glyma09g37070.N9	j	PAC:26340373	TSS35232	No	NO Cluster	AT5G15270	'27.4'	'RNA.RNA binding'	'highly similar to ( 540)AT5G15270| Symbols: | KH domain-containing protein | chr5:4958741-4960950 FORWARD no original description'
Glyma09g37070.N10	j	PAC:26340373	TSS35232	No	NO Cluster	AT5G15270	'27.4'	'RNA.RNA binding'	'highly similar to ( 540)AT5G15270| Symbols: | KH domain-containing protein | chr5:4958741-4960950 FORWARD no original description'
Glyma09g37070.N14	j	PAC:26340373	TSS35232	No	NO Cluster	AT5G15270	'27.4'	'RNA.RNA binding'	'highly similar to ( 540)AT5G15270| Symbols: | KH domain-containing protein | chr5:4958741-4960950 FORWARD no original description'
Glyma09g37070.N13	j	PAC:26340373	TSS35232	No	NO Cluster	AT5G15270	'27.4'	'RNA.RNA binding'	'highly similar to ( 540)AT5G15270| Symbols: | KH domain-containing protein | chr5:4958741-4960950 FORWARD no original description'
Glyma09g37070.N16	j	PAC:26340373	TSS35232	No	NO Cluster	AT5G15270	'27.4'	'RNA.RNA binding'	'highly similar to ( 540)AT5G15270| Symbols: | KH domain-containing protein | chr5:4958741-4960950 FORWARD no original description'
Glyma09g37070.N15	j	PAC:26340373	TSS35232	No	NO Cluster	AT5G15270	'27.4'	'RNA.RNA binding'	'highly similar to ( 540)AT5G15270| Symbols: | KH domain-containing protein | chr5:4958741-4960950 FORWARD no original description'
Glyma09g37070.4	=	PAC:26340374	TSS35232	Yes	68	AT5G15270	'27.4'	'RNA.RNA binding'	'highly similar to ( 540)AT5G15270| Symbols: | KH domain-containing protein | chr5:4958741-4960950 FORWARD no original description'
Glyma09g37070.3	=	PAC:26340373	TSS35232	No	NO Cluster	AT5G15270	'27.4'	'RNA.RNA binding'	'highly similar to ( 540)AT5G15270| Symbols: | KH domain-containing protein | chr5:4958741-4960950 FORWARD no original description'
Glyma09g37070.N17	j	PAC:26340373	TSS35232	No	NO Cluster	AT5G15270	'27.4'	'RNA.RNA binding'	'highly similar to ( 540)AT5G15270| Symbols: | KH domain-containing protein | chr5:4958741-4960950 FORWARD no original description'
Glyma09g37070.N11	j	PAC:26340373	TSS35232	No	NO Cluster	AT5G15270	'27.4'	'RNA.RNA binding'	'highly similar to ( 540)AT5G15270| Symbols: | KH domain-containing protein | chr5:4958741-4960950 FORWARD no original description'
Glyma09g37070.N12	j	PAC:26340373	TSS35232	No	NO Cluster	AT5G15270	'27.4'	'RNA.RNA binding'	'highly similar to ( 540)AT5G15270| Symbols: | KH domain-containing protein | chr5:4958741-4960950 FORWARD no original description'
Glyma09g37070.N5	j	PAC:26340373	TSS35232	No	NO Cluster	AT5G15270	'27.4'	'RNA.RNA binding'	'highly similar to ( 540)AT5G15270| Symbols: | KH domain-containing protein | chr5:4958741-4960950 FORWARD no original description'
Glyma09g37070.N6	j	PAC:26340373	TSS35232	No	NO Cluster	AT5G15270	'27.4'	'RNA.RNA binding'	'highly similar to ( 540)AT5G15270| Symbols: | KH domain-containing protein | chr5:4958741-4960950 FORWARD no original description'
Glyma09g37070.N7	j	PAC:26340373	TSS35232	No	NO Cluster	AT5G15270	'27.4'	'RNA.RNA binding'	'highly similar to ( 540)AT5G15270| Symbols: | KH domain-containing protein | chr5:4958741-4960950 FORWARD no original description'
Glyma09g37070.N8	j	PAC:26340373	TSS35232	No	NO Cluster	AT5G15270	'27.4'	'RNA.RNA binding'	'highly similar to ( 540)AT5G15270| Symbols: | KH domain-containing protein | chr5:4958741-4960950 FORWARD no original description'
Glyma09g41940.N2	x	PAC:26341414	TSS33654	No	NO Cluster	AT5G23190	'26.10'	'misc.cytochrome P450'	'highly similar to ( 749)AT5G23190| Symbols: CYP86B1 | CYP86B1 (cytochrome P450, family 86, subfamily B, polypeptide 1); oxygen binding | chr5:7803481-7805662 REVERSEweakly similar to ( 118)C97B1_PEA no original description'
Glyma09g41940.N3	x	PAC:26341414	TSS33655	No	NO Cluster	AT5G23190	'26.10'	'misc.cytochrome P450'	'highly similar to ( 749)AT5G23190| Symbols: CYP86B1 | CYP86B1 (cytochrome P450, family 86, subfamily B, polypeptide 1); oxygen binding | chr5:7803481-7805662 REVERSEweakly similar to ( 118)C97B1_PEA no original description'
Glyma09g41940.N4	j	PAC:26341414	TSS35555	No	NO Cluster	AT5G23190	'26.10'	'misc.cytochrome P450'	'highly similar to ( 749)AT5G23190| Symbols: CYP86B1 | CYP86B1 (cytochrome P450, family 86, subfamily B, polypeptide 1); oxygen binding | chr5:7803481-7805662 REVERSEweakly similar to ( 118)C97B1_PEA no original description'
Glyma09g41940.1	=	PAC:26341414	TSS35555	Yes	35	AT5G23190	'26.10'	'misc.cytochrome P450'	'highly similar to ( 749)AT5G23190| Symbols: CYP86B1 | CYP86B1 (cytochrome P450, family 86, subfamily B, polypeptide 1); oxygen binding | chr5:7803481-7805662 REVERSEweakly similar to ( 118)C97B1_PEA no original description'
Glyma20g33320.N3	o	PAC:26339560	TSS76302	No	NO Cluster	AT5G22880	'28.1.3'	'DNA.synthesis/chromatin structure.histone'	'weakly similar to ( 157)AT5G22880| Symbols: H2B, HTB2 | H2B/HTB2 (HISTONE H2B); DNA binding | chr5:7652133-7652570 REVERSEweakly similar to ( 161)H2B_GOSHI no original description'
Glyma20g33320.N2	o	PAC:26339560	TSS76302	No	NO Cluster	AT5G22880	'28.1.3'	'DNA.synthesis/chromatin structure.histone'	'weakly similar to ( 157)AT5G22880| Symbols: H2B, HTB2 | H2B/HTB2 (HISTONE H2B); DNA binding | chr5:7652133-7652570 REVERSEweakly similar to ( 161)H2B_GOSHI no original description'
Glyma20g33320.N5	o	PAC:26339560	TSS76302	Yes	10	AT5G22880	'28.1.3'	'DNA.synthesis/chromatin structure.histone'	'weakly similar to ( 157)AT5G22880| Symbols: H2B, HTB2 | H2B/HTB2 (HISTONE H2B); DNA binding | chr5:7652133-7652570 REVERSEweakly similar to ( 161)H2B_GOSHI no original description'
Glyma20g33320.N4	o	PAC:26339560	TSS76302	No	NO Cluster	AT5G22880	'28.1.3'	'DNA.synthesis/chromatin structure.histone'	'weakly similar to ( 157)AT5G22880| Symbols: H2B, HTB2 | H2B/HTB2 (HISTONE H2B); DNA binding | chr5:7652133-7652570 REVERSEweakly similar to ( 161)H2B_GOSHI no original description'
Glyma20g33320.1	=	PAC:26339560	TSS76302	No	NO Cluster	AT5G22880	'28.1.3'	'DNA.synthesis/chromatin structure.histone'	'weakly similar to ( 157)AT5G22880| Symbols: H2B, HTB2 | H2B/HTB2 (HISTONE H2B); DNA binding | chr5:7652133-7652570 REVERSEweakly similar to ( 161)H2B_GOSHI no original description'
Glyma20g33320.N6	o	PAC:26339560	TSS76302	No	NO Cluster	AT5G22880	'28.1.3'	'DNA.synthesis/chromatin structure.histone'	'weakly similar to ( 157)AT5G22880| Symbols: H2B, HTB2 | H2B/HTB2 (HISTONE H2B); DNA binding | chr5:7652133-7652570 REVERSEweakly similar to ( 161)H2B_GOSHI no original description'
Glyma01g41901.N4	j	PAC:26325615	TSS1368	No	NO Cluster	NO MapMan Annotation
Glyma01g41901.2	=	PAC:26325616	TSS1369	No	NO Cluster	NO MapMan Annotation
Glyma01g41901.1	=	PAC:26325615	TSS1368	Yes	36	NO MapMan Annotation
Glyma01g41901.N3	j	PAC:26325615	TSS1368	No	NO Cluster	NO MapMan Annotation
Glyma11g04750.N2	j	PAC:26298076	TSS40210	No	NO Cluster	AT1G50010	'31.1'	'cell.organisation'	'highly similar to ( 858)AT1G50010| Symbols: TUA2 | TUA2 (tubulin alpha-2 chain) | chr1:18521405-18523397 FORWARDhighly similar to ( 863)TBA4_GOSHI no original description'
Glyma11g04750.1	=	PAC:26298076	TSS40209	Yes	44	AT1G50010	'31.1'	'cell.organisation'	'highly similar to ( 858)AT1G50010| Symbols: TUA2 | TUA2 (tubulin alpha-2 chain) | chr1:18521405-18523397 FORWARDhighly similar to ( 863)TBA4_GOSHI no original description'
Glyma20g00790.1	=	PAC:26339056	TSS73357	Yes	7	AT3G11920	'21.4'	'redox.glutaredoxins'	'highly similar to ( 576)AT3G11920| Symbols: | glutaredoxin-related | chr3:3772317-3774893 FORWARD no original description'
Glyma20g00790.N3	j	PAC:26339056	TSS73357	No	NO Cluster	AT3G11920	'21.4'	'redox.glutaredoxins'	'highly similar to ( 576)AT3G11920| Symbols: | glutaredoxin-related | chr3:3772317-3774893 FORWARD no original description'
Glyma20g00790.N2	j	PAC:26339056	TSS73357	No	NO Cluster	AT3G11920	'21.4'	'redox.glutaredoxins'	'highly similar to ( 576)AT3G11920| Symbols: | glutaredoxin-related | chr3:3772317-3774893 FORWARD no original description'
Glyma11g33380.N2	j	PAC:26295982	TSS41515	No	NO Cluster	AT2G03820	'35.2'	'not assigned.unknown'	'highly similar to ( 649)AT2G03820| Symbols: | nonsense-mediated mRNA decay NMD3 family protein | chr2:1165146-1166696 REVERSE no original description'
Glyma11g33380.1	=	PAC:26295982	TSS41515	Yes	109	AT2G03820	'35.2'	'not assigned.unknown'	'highly similar to ( 649)AT2G03820| Symbols: | nonsense-mediated mRNA decay NMD3 family protein | chr2:1165146-1166696 REVERSE no original description'
Glyma04g41090.1	=	PAC:26304090	TSS12858	Yes	32	AT4G27720	'35.2'	'not assigned.unknown'	'highly similar to ( 722)AT4G27720| Symbols: | similar to unknown protein [Arabidopsis thaliana] (TAIR:AT1G64650.2); similar to unknown protein [Arabidopsis thaliana] (TAIR:AT1G64650.1); similar to unknown protein [Arabidopsis thaliana] (TAIR:AT3G49310.1); similar to unknown [Populus trichocarpa] (GB:ABK93582.1); similar to unnamed protein product [Vitis vinifera] (GB:CAO48607.1); similar to unna…
Glyma04g41090.N6	j	PAC:26304090	TSS12858	No	NO Cluster	AT4G27720	'35.2'	'not assigned.unknown'	'highly similar to ( 722)AT4G27720| Symbols: | similar to unknown protein [Arabidopsis thaliana] (TAIR:AT1G64650.2); similar to unknown protein [Arabidopsis thaliana] (TAIR:AT1G64650.1); similar to unknown protein [Arabidopsis thaliana] (TAIR:AT3G49310.1); similar to unknown [Populus trichocarpa] (GB:ABK93582.1); similar to unnamed protein product [Vitis vinifera] (GB:CAO48607.1); similar to unna…
Glyma04g41090.N5	j	PAC:26304090	TSS12858	No	NO Cluster	AT4G27720	'35.2'	'not assigned.unknown'	'highly similar to ( 722)AT4G27720| Symbols: | similar to unknown protein [Arabidopsis thaliana] (TAIR:AT1G64650.2); similar to unknown protein [Arabidopsis thaliana] (TAIR:AT1G64650.1); similar to unknown protein [Arabidopsis thaliana] (TAIR:AT3G49310.1); similar to unknown [Populus trichocarpa] (GB:ABK93582.1); similar to unnamed protein product [Vitis vinifera] (GB:CAO48607.1); similar to unna…
Glyma04g41090.N3	j	PAC:26304090	TSS12858	No	NO Cluster	AT4G27720	'35.2'	'not assigned.unknown'	'highly similar to ( 722)AT4G27720| Symbols: | similar to unknown protein [Arabidopsis thaliana] (TAIR:AT1G64650.2); similar to unknown protein [Arabidopsis thaliana] (TAIR:AT1G64650.1); similar to unknown protein [Arabidopsis thaliana] (TAIR:AT3G49310.1); similar to unknown [Populus trichocarpa] (GB:ABK93582.1); similar to unnamed protein product [Vitis vinifera] (GB:CAO48607.1); similar to unna…
Glyma04g41090.N4	j	PAC:26304090	TSS12858	No	NO Cluster	AT4G27720	'35.2'	'not assigned.unknown'	'highly similar to ( 722)AT4G27720| Symbols: | similar to unknown protein [Arabidopsis thaliana] (TAIR:AT1G64650.2); similar to unknown protein [Arabidopsis thaliana] (TAIR:AT1G64650.1); similar to unknown protein [Arabidopsis thaliana] (TAIR:AT3G49310.1); similar to unknown [Populus trichocarpa] (GB:ABK93582.1); similar to unnamed protein product [Vitis vinifera] (GB:CAO48607.1); similar to unna…
Glyma04g41090.N2	j	PAC:26304090	TSS12858	No	NO Cluster	AT4G27720	'35.2'	'not assigned.unknown'	'highly similar to ( 722)AT4G27720| Symbols: | similar to unknown protein [Arabidopsis thaliana] (TAIR:AT1G64650.2); similar to unknown protein [Arabidopsis thaliana] (TAIR:AT1G64650.1); similar to unknown protein [Arabidopsis thaliana] (TAIR:AT3G49310.1); similar to unknown [Populus trichocarpa] (GB:ABK93582.1); similar to unnamed protein product [Vitis vinifera] (GB:CAO48607.1); similar to unna…
Glyma18g48800.N3	j	PAC:26355349	TSS69245	No	NO Cluster	AT4G37440	'35.2'	'not assigned.unknown'	'weakly similar to ( 112)AT4G37440| Symbols: | similar to unknown protein [Arabidopsis thaliana] (TAIR:AT3G59670.1); similar to unnamed protein product [Vitis vinifera] (GB:CAO46283.1) | chr4:17601641-17603760 FORWARD no original description'
Glyma18g48800.N6	j	PAC:26355349	TSS69245	No	NO Cluster	AT4G37440	'35.2'	'not assigned.unknown'	'weakly similar to ( 112)AT4G37440| Symbols: | similar to unknown protein [Arabidopsis thaliana] (TAIR:AT3G59670.1); similar to unnamed protein product [Vitis vinifera] (GB:CAO46283.1) | chr4:17601641-17603760 FORWARD no original description'
Glyma18g48800.1	=	PAC:26355348	TSS69245	Yes	61	AT4G37440	'35.2'	'not assigned.unknown'	'weakly similar to ( 112)AT4G37440| Symbols: | similar to unknown protein [Arabidopsis thaliana] (TAIR:AT3G59670.1); similar to unnamed protein product [Vitis vinifera] (GB:CAO46283.1) | chr4:17601641-17603760 FORWARD no original description'
Glyma18g48800.N4	j	PAC:26355349	TSS69245	No	NO Cluster	AT4G37440	'35.2'	'not assigned.unknown'	'weakly similar to ( 112)AT4G37440| Symbols: | similar to unknown protein [Arabidopsis thaliana] (TAIR:AT3G59670.1); similar to unnamed protein product [Vitis vinifera] (GB:CAO46283.1) | chr4:17601641-17603760 FORWARD no original description'
Glyma18g48800.N5	j	PAC:26355349	TSS69245	No	NO Cluster	AT4G37440	'35.2'	'not assigned.unknown'	'weakly similar to ( 112)AT4G37440| Symbols: | similar to unknown protein [Arabidopsis thaliana] (TAIR:AT3G59670.1); similar to unnamed protein product [Vitis vinifera] (GB:CAO46283.1) | chr4:17601641-17603760 FORWARD no original description'
Glyma18g48800.2	=	PAC:26355349	TSS69245	No	NO Cluster	AT4G37440	'35.2'	'not assigned.unknown'	'weakly similar to ( 112)AT4G37440| Symbols: | similar to unknown protein [Arabidopsis thaliana] (TAIR:AT3G59670.1); similar to unnamed protein product [Vitis vinifera] (GB:CAO46283.1) | chr4:17601641-17603760 FORWARD no original description'
Glyma16g26520.1	=	PAC:26353691	TSS59956	Yes	103	AT4G37370	'26.10'	'misc.cytochrome P450'	'highly similar to ( 570)AT4G37370| Symbols: CYP81D8 | CYP81D8 (cytochrome P450, family 81, subfamily D, polypeptide 8); oxygen binding | chr4:17569965-17571672 REVERSEmoderately similar to ( 338)C82A1_PEA no original description'
Glyma16g26520.N2	j	PAC:26353691	TSS59956	No	NO Cluster	AT4G37370	'26.10'	'misc.cytochrome P450'	'highly similar to ( 570)AT4G37370| Symbols: CYP81D8 | CYP81D8 (cytochrome P450, family 81, subfamily D, polypeptide 8); oxygen binding | chr4:17569965-17571672 REVERSEmoderately similar to ( 338)C82A1_PEA no original description'
Glyma16g26520.N3	j	PAC:26353691	TSS59956	No	NO Cluster	AT4G37370	'26.10'	'misc.cytochrome P450'	'highly similar to ( 570)AT4G37370| Symbols: CYP81D8 | CYP81D8 (cytochrome P450, family 81, subfamily D, polypeptide 8); oxygen binding | chr4:17569965-17571672 REVERSEmoderately similar to ( 338)C82A1_PEA no original description'
Glyma08g39830.N8	j	PAC:26306273	TSS31129	No	NO Cluster	AT1G23860	'27.1.1'	'RNA.processing.splicing'	'weakly similar to ( 151)AT1G23860| Symbols: RSZP21, SRZ21, SRZ-21 | SRZ-21 | chr1:8428080-8429153 REVERSE no original description'
Glyma08g39830.6	=	PAC:26306274	TSS31130	No	NO Cluster	AT1G23860	'27.1.1'	'RNA.processing.splicing'	'weakly similar to ( 151)AT1G23860| Symbols: RSZP21, SRZ21, SRZ-21 | SRZ-21 | chr1:8428080-8429153 REVERSE no original description'
Glyma08g39830.1	=	PAC:26306272	TSS31130	Yes	114	AT1G23860	'27.1.1'	'RNA.processing.splicing'	'weakly similar to ( 151)AT1G23860| Symbols: RSZP21, SRZ21, SRZ-21 | SRZ-21 | chr1:8428080-8429153 REVERSE no original description'
Glyma08g39830.5	=	PAC:26306273	TSS31129	No	NO Cluster	AT1G23860	'27.1.1'	'RNA.processing.splicing'	'weakly similar to ( 151)AT1G23860| Symbols: RSZP21, SRZ21, SRZ-21 | SRZ-21 | chr1:8428080-8429153 REVERSE no original description'
Glyma08g39830.N7	j	PAC:26306273	TSS31129	No	NO Cluster	AT1G23860	'27.1.1'	'RNA.processing.splicing'	'weakly similar to ( 151)AT1G23860| Symbols: RSZP21, SRZ21, SRZ-21 | SRZ-21 | chr1:8428080-8429153 REVERSE no original description'
Glyma01g35320.N3	j	PAC:26324113	TSS2580	No	NO Cluster	AT1G31830	'34.3'	'transport.amino acids'	'highly similar to ( 642)AT1G31830| Symbols: | amino acid permease family protein | chr1:11418856-11420295 REVERSE no original description'
Glyma01g35320.N2	j	PAC:26324113	TSS2580	No	NO Cluster	AT1G31830	'34.3'	'transport.amino acids'	'highly similar to ( 642)AT1G31830| Symbols: | amino acid permease family protein | chr1:11418856-11420295 REVERSE no original description'
Glyma01g35320.N5	j	PAC:26324113	TSS2580	No	NO Cluster	AT1G31830	'34.3'	'transport.amino acids'	'highly similar to ( 642)AT1G31830| Symbols: | amino acid permease family protein | chr1:11418856-11420295 REVERSE no original description'
Glyma01g35320.N4	j	PAC:26324113	TSS2580	No	NO Cluster	AT1G31830	'34.3'	'transport.amino acids'	'highly similar to ( 642)AT1G31830| Symbols: | amino acid permease family protein | chr1:11418856-11420295 REVERSE no original description'
Glyma01g35320.1	=	PAC:26324113	TSS2581	Yes	63	AT1G31830	'34.3'	'transport.amino acids'	'highly similar to ( 642)AT1G31830| Symbols: | amino acid permease family protein | chr1:11418856-11420295 REVERSE no original description'
Glyma05g05270.N4	j	PAC:26322266	TSS16823	No	NO Cluster	AT4G17550	'34.98'	'transporter.membrane system unknown'	'highly similar to ( 644)AT4G17550| Symbols: | transporter-related | chr4:9777951-9779751 REVERSE no original description'
Glyma05g05270.N2	j	PAC:26322266	TSS16823	No	NO Cluster	AT4G17550	'34.98'	'transporter.membrane system unknown'	'highly similar to ( 644)AT4G17550| Symbols: | transporter-related | chr4:9777951-9779751 REVERSE no original description'
Glyma05g05270.1	=	PAC:26322266	TSS16823	Yes	89	AT4G17550	'34.98'	'transporter.membrane system unknown'	'highly similar to ( 644)AT4G17550| Symbols: | transporter-related | chr4:9777951-9779751 REVERSE no original description'
Glyma05g05270.N3	j	PAC:26322266	TSS16823	No	NO Cluster	AT4G17550	'34.98'	'transporter.membrane system unknown'	'highly similar to ( 644)AT4G17550| Symbols: | transporter-related | chr4:9777951-9779751 REVERSE no original description'
Glyma05g24610.N7	j	PAC:26322604	TSS15586	No	NO Cluster	AT1G36050	'21.1'	'redox.thioredoxin'	'highly similar to ( 568)AT1G36050| Symbols: | similar to unknown protein [Arabidopsis thaliana] (TAIR:AT1G22200.1); similar to unnamed protein product [Vitis vinifera] (GB:CAO61738.1); contains InterPro domain Protein of unknown function DUF1692 (InterPro:IPR012936) | chr1:13451679-13454267 FORWARD no original description'
Glyma05g24610.N8	j	PAC:26322604	TSS15586	No	NO Cluster	AT1G36050	'21.1'	'redox.thioredoxin'	'highly similar to ( 568)AT1G36050| Symbols: | similar to unknown protein [Arabidopsis thaliana] (TAIR:AT1G22200.1); similar to unnamed protein product [Vitis vinifera] (GB:CAO61738.1); contains InterPro domain Protein of unknown function DUF1692 (InterPro:IPR012936) | chr1:13451679-13454267 FORWARD no original description'
Glyma05g24610.2	=	PAC:26322604	TSS15586	Yes	77	AT1G36050	'21.1'	'redox.thioredoxin'	'highly similar to ( 568)AT1G36050| Symbols: | similar to unknown protein [Arabidopsis thaliana] (TAIR:AT1G22200.1); similar to unnamed protein product [Vitis vinifera] (GB:CAO61738.1); contains InterPro domain Protein of unknown function DUF1692 (InterPro:IPR012936) | chr1:13451679-13454267 FORWARD no original description'
Glyma05g24610.N3	j	PAC:26322604	TSS15586	No	NO Cluster	AT1G36050	'21.1'	'redox.thioredoxin'	'highly similar to ( 568)AT1G36050| Symbols: | similar to unknown protein [Arabidopsis thaliana] (TAIR:AT1G22200.1); similar to unnamed protein product [Vitis vinifera] (GB:CAO61738.1); contains InterPro domain Protein of unknown function DUF1692 (InterPro:IPR012936) | chr1:13451679-13454267 FORWARD no original description'
Glyma05g24610.N4	j	PAC:26322604	TSS15586	No	NO Cluster	AT1G36050	'21.1'	'redox.thioredoxin'	'highly similar to ( 568)AT1G36050| Symbols: | similar to unknown protein [Arabidopsis thaliana] (TAIR:AT1G22200.1); similar to unnamed protein product [Vitis vinifera] (GB:CAO61738.1); contains InterPro domain Protein of unknown function DUF1692 (InterPro:IPR012936) | chr1:13451679-13454267 FORWARD no original description'
Glyma05g24610.N5	j	PAC:26322604	TSS15586	No	NO Cluster	AT1G36050	'21.1'	'redox.thioredoxin'	'highly similar to ( 568)AT1G36050| Symbols: | similar to unknown protein [Arabidopsis thaliana] (TAIR:AT1G22200.1); similar to unnamed protein product [Vitis vinifera] (GB:CAO61738.1); contains InterPro domain Protein of unknown function DUF1692 (InterPro:IPR012936) | chr1:13451679-13454267 FORWARD no original description'
Glyma05g24610.N6	j	PAC:26322604	TSS15586	No	NO Cluster	AT1G36050	'21.1'	'redox.thioredoxin'	'highly similar to ( 568)AT1G36050| Symbols: | similar to unknown protein [Arabidopsis thaliana] (TAIR:AT1G22200.1); similar to unnamed protein product [Vitis vinifera] (GB:CAO61738.1); contains InterPro domain Protein of unknown function DUF1692 (InterPro:IPR012936) | chr1:13451679-13454267 FORWARD no original description'
Glyma11g06900.N2	j	PAC:26296906	TSS42235	No	NO Cluster	AT4G36760	'29.5'	'protein.degradation'	'highly similar to ( 959)AT4G36760| Symbols: APP1, ATAPP1 | ATAPP1 (aminopeptidase P1) | chr4:17326727-17329461 FORWARD no original description'
Glyma11g06900.N11	j	PAC:26296906	TSS42235	No	NO Cluster	AT4G36760	'29.5'	'protein.degradation'	'highly similar to ( 959)AT4G36760| Symbols: APP1, ATAPP1 | ATAPP1 (aminopeptidase P1) | chr4:17326727-17329461 FORWARD no original description'
Glyma11g06900.1	=	PAC:26296906	TSS42235	Yes	114	AT4G36760	'29.5'	'protein.degradation'	'highly similar to ( 959)AT4G36760| Symbols: APP1, ATAPP1 | ATAPP1 (aminopeptidase P1) | chr4:17326727-17329461 FORWARD no original description'
Glyma11g06900.N6	j	PAC:26296906	TSS42235	No	NO Cluster	AT4G36760	'29.5'	'protein.degradation'	'highly similar to ( 959)AT4G36760| Symbols: APP1, ATAPP1 | ATAPP1 (aminopeptidase P1) | chr4:17326727-17329461 FORWARD no original description'
Glyma11g06900.N5	j	PAC:26296906	TSS42235	No	NO Cluster	AT4G36760	'29.5'	'protein.degradation'	'highly similar to ( 959)AT4G36760| Symbols: APP1, ATAPP1 | ATAPP1 (aminopeptidase P1) | chr4:17326727-17329461 FORWARD no original description'
Glyma11g06900.N4	j	PAC:26296906	TSS42235	No	NO Cluster	AT4G36760	'29.5'	'protein.degradation'	'highly similar to ( 959)AT4G36760| Symbols: APP1, ATAPP1 | ATAPP1 (aminopeptidase P1) | chr4:17326727-17329461 FORWARD no original description'
Glyma11g06900.N3	j	PAC:26296906	TSS42235	No	NO Cluster	AT4G36760	'29.5'	'protein.degradation'	'highly similar to ( 959)AT4G36760| Symbols: APP1, ATAPP1 | ATAPP1 (aminopeptidase P1) | chr4:17326727-17329461 FORWARD no original description'
Glyma11g06900.N9	j	PAC:26296906	TSS42235	No	NO Cluster	AT4G36760	'29.5'	'protein.degradation'	'highly similar to ( 959)AT4G36760| Symbols: APP1, ATAPP1 | ATAPP1 (aminopeptidase P1) | chr4:17326727-17329461 FORWARD no original description'
Glyma11g06900.N8	j	PAC:26296906	TSS42235	No	NO Cluster	AT4G36760	'29.5'	'protein.degradation'	'highly similar to ( 959)AT4G36760| Symbols: APP1, ATAPP1 | ATAPP1 (aminopeptidase P1) | chr4:17326727-17329461 FORWARD no original description'
Glyma11g06900.N10	j	PAC:26296906	TSS42235	No	NO Cluster	AT4G36760	'29.5'	'protein.degradation'	'highly similar to ( 959)AT4G36760| Symbols: APP1, ATAPP1 | ATAPP1 (aminopeptidase P1) | chr4:17326727-17329461 FORWARD no original description'
Glyma11g06900.N7	j	PAC:26296906	TSS42235	No	NO Cluster	AT4G36760	'29.5'	'protein.degradation'	'highly similar to ( 959)AT4G36760| Symbols: APP1, ATAPP1 | ATAPP1 (aminopeptidase P1) | chr4:17326727-17329461 FORWARD no original description'
Glyma07g12980.N3	j	PAC:26349159	TSS25431	Yes	73	AT3G60210	'29.6'	'protein.folding'	'weakly similar to ( 176)AT3G60210| Symbols: | chloroplast chaperonin 10, putative | chr3:22262418-22263684 REVERSE no original description'
Glyma07g12980.N2	j	PAC:26349159	TSS25431	No	NO Cluster	AT3G60210	'29.6'	'protein.folding'	'weakly similar to ( 176)AT3G60210| Symbols: | chloroplast chaperonin 10, putative | chr3:22262418-22263684 REVERSE no original description'
Glyma07g12980.N4	j	PAC:26349159	TSS25431	No	NO Cluster	AT3G60210	'29.6'	'protein.folding'	'weakly similar to ( 176)AT3G60210| Symbols: | chloroplast chaperonin 10, putative | chr3:22262418-22263684 REVERSE no original description'
Glyma07g12980.1	=	PAC:26349159	TSS25431	No	NO Cluster	AT3G60210	'29.6'	'protein.folding'	'weakly similar to ( 176)AT3G60210| Symbols: | chloroplast chaperonin 10, putative | chr3:22262418-22263684 REVERSE no original description'
Glyma17g02590.2	=	PAC:26311648	TSS62106	No	NO Cluster	No Arabidopsis Homolohue	'35.2'	'not assigned.unknown'	'no original description'
Glyma17g02590.1	=	PAC:26311647	TSS62105	No	NO Cluster	No Arabidopsis Homolohue	'35.2'	'not assigned.unknown'	'no original description'
Glyma17g02590.3	=	PAC:26311649	TSS62105	Yes	81	No Arabidopsis Homolohue	'35.2'	'not assigned.unknown'	'no original description'
Glyma17g02590.N7	j	PAC:26311649	TSS62105	No	NO Cluster	No Arabidopsis Homolohue	'35.2'	'not assigned.unknown'	'no original description'
Glyma17g02590.N8	j	PAC:26311649	TSS62105	No	NO Cluster	No Arabidopsis Homolohue	'35.2'	'not assigned.unknown'	'no original description'
Glyma17g02590.N5	j	PAC:26311649	TSS62105	No	NO Cluster	No Arabidopsis Homolohue	'35.2'	'not assigned.unknown'	'no original description'
Glyma17g02590.N6	j	PAC:26311649	TSS62105	No	NO Cluster	No Arabidopsis Homolohue	'35.2'	'not assigned.unknown'	'no original description'
Glyma17g02590.N4	j	PAC:26311649	TSS62105	No	NO Cluster	No Arabidopsis Homolohue	'35.2'	'not assigned.unknown'	'no original description'
Glyma17g02590.N9	j	PAC:26311649	TSS62105	No	NO Cluster	No Arabidopsis Homolohue	'35.2'	'not assigned.unknown'	'no original description'
Glyma17g02590.N10	j	PAC:26311649	TSS62105	No	NO Cluster	No Arabidopsis Homolohue	'35.2'	'not assigned.unknown'	'no original description'
Glyma15g00681.N2	o	PAC:26329674	TSS57041	No	NO Cluster	NO MapMan Annotation
Glyma15g00681.N4	o	PAC:26329674	TSS57041	No	NO Cluster	NO MapMan Annotation
Glyma15g00681.N3	o	PAC:26329674	TSS57041	No	NO Cluster	NO MapMan Annotation
Glyma15g00681.N6	o	PAC:26329674	TSS57041	No	NO Cluster	NO MapMan Annotation
Glyma15g00681.N5	o	PAC:26329674	TSS57041	Yes	38	NO MapMan Annotation
Glyma15g00681.1	=	PAC:26329674	TSS57042	No	NO Cluster	NO MapMan Annotation
Glyma09g39980.3	=	PAC:26342780	TSS35409	Yes	36	AT4G23010	'34.11'	'transport.NDP-sugars at the ER'	'highly similar to ( 529)AT4G23010| Symbols: ATUTR2, UTR2 | ATUTR2/UTR2 (UDP-GALACTOSE TRANSPORTER 2) | chr4:12060329-12062497 REVERSE no original description'
Glyma09g39980.2	=	PAC:26342781	TSS35408	No	NO Cluster	AT4G23010	'34.11'	'transport.NDP-sugars at the ER'	'highly similar to ( 529)AT4G23010| Symbols: ATUTR2, UTR2 | ATUTR2/UTR2 (UDP-GALACTOSE TRANSPORTER 2) | chr4:12060329-12062497 REVERSE no original description'
Glyma12g31691.1	=	PAC:26293357	TSS46474	Yes	40	NO MapMan Annotation
Glyma12g31691.N2	j	PAC:26293357	TSS46474	No	NO Cluster	NO MapMan Annotation
Glyma08g22550.N2	j	PAC:26310488	TSS28099	No	NO Cluster	AT1G29250	'35.2'	'not assigned.unknown'	'weakly similar to ( 165)AT1G29250| Symbols: | nucleic acid binding | chr1:10223447-10224578 REVERSE no original description'
Glyma08g22550.1	=	PAC:26310488	TSS28099	Yes	62	AT1G29250	'35.2'	'not assigned.unknown'	'weakly similar to ( 165)AT1G29250| Symbols: | nucleic acid binding | chr1:10223447-10224578 REVERSE no original description'
Glyma01g00870.1	=	PAC:26323214	TSS1654	No	NO Cluster	AT4G26270	'4.4'	'glycolysis.PPFK'	'highly similar to ( 813)AT4G26270| Symbols: | phosphofructokinase family protein | chr4:13301103-13304039 REVERSE no original description'
Glyma01g00870.N4	j	PAC:26323214	TSS1654	No	NO Cluster	AT4G26270	'4.4'	'glycolysis.PPFK'	'highly similar to ( 813)AT4G26270| Symbols: | phosphofructokinase family protein | chr4:13301103-13304039 REVERSE no original description'
Glyma01g00870.N3	j	PAC:26323214	TSS1653	Yes	114	AT4G26270	'4.4'	'glycolysis.PPFK'	'highly similar to ( 813)AT4G26270| Symbols: | phosphofructokinase family protein | chr4:13301103-13304039 REVERSE no original description'
Glyma01g00870.2	=	PAC:26323215	TSS1652	No	NO Cluster	AT4G26270	'4.4'	'glycolysis.PPFK'	'highly similar to ( 813)AT4G26270| Symbols: | phosphofructokinase family protein | chr4:13301103-13304039 REVERSE no original description'
Glyma05g10100.N2	j	PAC:26321287	TSS15323	No	NO Cluster	AT2G15790	'31.3.1'	'cell.cycle.peptidylprolyl isomerase'	'highly similar to ( 538)AT2G15790| Symbols: CYP40, SQN | SQN (SQUINT) | chr2:6885226-6887825 REVERSEmoderately similar to ( 201)CYPH_CATRO no original description'
Glyma05g10100.N4	j	PAC:26321287	TSS15323	No	NO Cluster	AT2G15790	'31.3.1'	'cell.cycle.peptidylprolyl isomerase'	'highly similar to ( 538)AT2G15790| Symbols: CYP40, SQN | SQN (SQUINT) | chr2:6885226-6887825 REVERSEmoderately similar to ( 201)CYPH_CATRO no original description'
Glyma05g10100.N3	j	PAC:26321287	TSS15323	No	NO Cluster	AT2G15790	'31.3.1'	'cell.cycle.peptidylprolyl isomerase'	'highly similar to ( 538)AT2G15790| Symbols: CYP40, SQN | SQN (SQUINT) | chr2:6885226-6887825 REVERSEmoderately similar to ( 201)CYPH_CATRO no original description'
Glyma05g10100.N6	j	PAC:26321287	TSS15323	No	NO Cluster	AT2G15790	'31.3.1'	'cell.cycle.peptidylprolyl isomerase'	'highly similar to ( 538)AT2G15790| Symbols: CYP40, SQN | SQN (SQUINT) | chr2:6885226-6887825 REVERSEmoderately similar to ( 201)CYPH_CATRO no original description'
Glyma05g10100.N5	j	PAC:26321287	TSS15323	No	NO Cluster	AT2G15790	'31.3.1'	'cell.cycle.peptidylprolyl isomerase'	'highly similar to ( 538)AT2G15790| Symbols: CYP40, SQN | SQN (SQUINT) | chr2:6885226-6887825 REVERSEmoderately similar to ( 201)CYPH_CATRO no original description'
Glyma05g10100.N7	j	PAC:26321287	TSS15323	No	NO Cluster	AT2G15790	'31.3.1'	'cell.cycle.peptidylprolyl isomerase'	'highly similar to ( 538)AT2G15790| Symbols: CYP40, SQN | SQN (SQUINT) | chr2:6885226-6887825 REVERSEmoderately similar to ( 201)CYPH_CATRO no original description'
Glyma05g10100.N10	x	PAC:26321287	TSS17019	No	NO Cluster	AT2G15790	'31.3.1'	'cell.cycle.peptidylprolyl isomerase'	'highly similar to ( 538)AT2G15790| Symbols: CYP40, SQN | SQN (SQUINT) | chr2:6885226-6887825 REVERSEmoderately similar to ( 201)CYPH_CATRO no original description'
Glyma05g10100.N8	j	PAC:26321287	TSS15323	No	NO Cluster	AT2G15790	'31.3.1'	'cell.cycle.peptidylprolyl isomerase'	'highly similar to ( 538)AT2G15790| Symbols: CYP40, SQN | SQN (SQUINT) | chr2:6885226-6887825 REVERSEmoderately similar to ( 201)CYPH_CATRO no original description'
Glyma05g10100.1	=	PAC:26321287	TSS15323	Yes	57	AT2G15790	'31.3.1'	'cell.cycle.peptidylprolyl isomerase'	'highly similar to ( 538)AT2G15790| Symbols: CYP40, SQN | SQN (SQUINT) | chr2:6885226-6887825 REVERSEmoderately similar to ( 201)CYPH_CATRO no original description'
Glyma05g10100.N9	j	PAC:26321287	TSS15323	No	NO Cluster	AT2G15790	'31.3.1'	'cell.cycle.peptidylprolyl isomerase'	'highly similar to ( 538)AT2G15790| Symbols: CYP40, SQN | SQN (SQUINT) | chr2:6885226-6887825 REVERSEmoderately similar to ( 201)CYPH_CATRO no original description'
Glyma18g06720.2	=	PAC:26356803	TSS66024	No	NO Cluster	AT5G58575	'35.2'	'not assigned.unknown'	'weakly similar to ( 183)AT5G58575| Symbols: | similar to hypothetical protein [Platanus x acerifolia] (GB:CAL07976.1); contains InterPro domain Sgf11, transcriptional regulation (InterPro:IPR013246) | chr5:23691625-23692450 FORWARD no original description'
Glyma18g06720.N3	j	PAC:26356803	TSS66023	Yes	63	AT5G58575	'35.2'	'not assigned.unknown'	'weakly similar to ( 183)AT5G58575| Symbols: | similar to hypothetical protein [Platanus x acerifolia] (GB:CAL07976.1); contains InterPro domain Sgf11, transcriptional regulation (InterPro:IPR013246) | chr5:23691625-23692450 FORWARD no original description'
Glyma18g06720.N4	j	PAC:26356803	TSS66023	No	NO Cluster	AT5G58575	'35.2'	'not assigned.unknown'	'weakly similar to ( 183)AT5G58575| Symbols: | similar to hypothetical protein [Platanus x acerifolia] (GB:CAL07976.1); contains InterPro domain Sgf11, transcriptional regulation (InterPro:IPR013246) | chr5:23691625-23692450 FORWARD no original description'
Glyma13g35460.1	=	PAC:26317988	TSS48752	Yes	22	AT3G15430	'31.2'	'cell.division'	'highly similar to ( 704)AT3G15430| Symbols: | regulator of chromosome condensation (RCC1) family protein | chr3:5209415-5211569 FORWARD no original description'
Glyma13g35460.N2	j	PAC:26317988	TSS48752	No	NO Cluster	AT3G15430	'31.2'	'cell.division'	'highly similar to ( 704)AT3G15430| Symbols: | regulator of chromosome condensation (RCC1) family protein | chr3:5209415-5211569 FORWARD no original description'
Glyma11g12200.N3	j	PAC:26297384	TSS42555	No	NO Cluster	AT3G05060	'27.3.67'	'RNA.regulation of transcription.putative transcription regulator'	'highly similar to ( 712)AT3G05060| Symbols: | SAR DNA-binding protein, putative | chr3:1413180-1415570 REVERSE no original description'
Glyma11g12200.N2	j	PAC:26297384	TSS42554	No	NO Cluster	AT3G05060	'27.3.67'	'RNA.regulation of transcription.putative transcription regulator'	'highly similar to ( 712)AT3G05060| Symbols: | SAR DNA-binding protein, putative | chr3:1413180-1415570 REVERSE no original description'
Glyma11g12200.1	=	PAC:26297384	TSS42555	Yes	55	AT3G05060	'27.3.67'	'RNA.regulation of transcription.putative transcription regulator'	'highly similar to ( 712)AT3G05060| Symbols: | SAR DNA-binding protein, putative | chr3:1413180-1415570 REVERSE no original description'
Glyma19g28126.N4	j	PAC:26326726	TSS70376	No	NO Cluster	NO MapMan Annotation
Glyma19g28126.N5	j	PAC:26326726	TSS70376	No	NO Cluster	NO MapMan Annotation
Glyma19g28126.N2	j	PAC:26326726	TSS70376	No	NO Cluster	NO MapMan Annotation
Glyma19g28126.N3	j	PAC:26326726	TSS70376	No	NO Cluster	NO MapMan Annotation
Glyma19g28126.N6	j	PAC:26326726	TSS70376	No	NO Cluster	NO MapMan Annotation
Glyma19g28126.N7	j	PAC:26326726	TSS70376	No	NO Cluster	NO MapMan Annotation
Glyma19g28126.1	=	PAC:26326726	TSS70376	Yes	33	NO MapMan Annotation
Glyma18g52120.N7	j	PAC:26353940	TSS67498	No	NO Cluster	AT1G69040	'13'	'amino acid metabolism'	'moderately similar to ( 481)AT1G69040| Symbols: ACR4 | ACR4 (ACT REPEAT 4); amino acid binding | chr1:25961506-25963742 FORWARD no original description'
Glyma18g52120.N6	j	PAC:26353940	TSS67498	No	NO Cluster	AT1G69040	'13'	'amino acid metabolism'	'moderately similar to ( 481)AT1G69040| Symbols: ACR4 | ACR4 (ACT REPEAT 4); amino acid binding | chr1:25961506-25963742 FORWARD no original description'
Glyma18g52120.N9	j	PAC:26353940	TSS67498	No	NO Cluster	AT1G69040	'13'	'amino acid metabolism'	'moderately similar to ( 481)AT1G69040| Symbols: ACR4 | ACR4 (ACT REPEAT 4); amino acid binding | chr1:25961506-25963742 FORWARD no original description'
Glyma18g52120.N8	j	PAC:26353940	TSS67498	No	NO Cluster	AT1G69040	'13'	'amino acid metabolism'	'moderately similar to ( 481)AT1G69040| Symbols: ACR4 | ACR4 (ACT REPEAT 4); amino acid binding | chr1:25961506-25963742 FORWARD no original description'
Glyma18g52120.N3	j	PAC:26353940	TSS67498	No	NO Cluster	AT1G69040	'13'	'amino acid metabolism'	'moderately similar to ( 481)AT1G69040| Symbols: ACR4 | ACR4 (ACT REPEAT 4); amino acid binding | chr1:25961506-25963742 FORWARD no original description'
Glyma18g52120.N2	j	PAC:26353940	TSS67498	No	NO Cluster	AT1G69040	'13'	'amino acid metabolism'	'moderately similar to ( 481)AT1G69040| Symbols: ACR4 | ACR4 (ACT REPEAT 4); amino acid binding | chr1:25961506-25963742 FORWARD no original description'
Glyma18g52120.N5	j	PAC:26353940	TSS67498	No	NO Cluster	AT1G69040	'13'	'amino acid metabolism'	'moderately similar to ( 481)AT1G69040| Symbols: ACR4 | ACR4 (ACT REPEAT 4); amino acid binding | chr1:25961506-25963742 FORWARD no original description'
Glyma18g52120.N4	j	PAC:26353940	TSS67498	No	NO Cluster	AT1G69040	'13'	'amino acid metabolism'	'moderately similar to ( 481)AT1G69040| Symbols: ACR4 | ACR4 (ACT REPEAT 4); amino acid binding | chr1:25961506-25963742 FORWARD no original description'
Glyma18g52120.1	=	PAC:26353940	TSS67498	Yes	37	AT1G69040	'13'	'amino acid metabolism'	'moderately similar to ( 481)AT1G69040| Symbols: ACR4 | ACR4 (ACT REPEAT 4); amino acid binding | chr1:25961506-25963742 FORWARD no original description'
Glyma16g22290.N2	j	PAC:26351968	TSS59739	No	NO Cluster	AT5G66010	'35.2'	'not assigned.unknown'	'moderately similar to ( 340)AT5G66010| Symbols: | RNA binding | chr5:26416838-26417979 FORWARD no original description'
Glyma16g22290.1	=	PAC:26351968	TSS59740	Yes	70	AT5G66010	'35.2'	'not assigned.unknown'	'moderately similar to ( 340)AT5G66010| Symbols: | RNA binding | chr5:26416838-26417979 FORWARD no original description'
Glyma13g17290.3	=	PAC:26317516	TSS47553	No	NO Cluster	AT1G74960	'11.1.3'	'lipid metabolism.FA synthesis and FA elongation.ketoacyl ACP synthase'	'highly similar to ( 674)AT1G74960| Symbols: KAS2, FAB1 | FAB1 (FATTY ACID BIOSYNTHESIS 1); fatty-acid synthase | chr1:28156225-28159609 REVERSEmoderately similar to ( 393)KASC1_HORVU no original description'
Glyma13g17290.4	=	PAC:26317517	TSS47553	Yes	25	AT1G74960	'11.1.3'	'lipid metabolism.FA synthesis and FA elongation.ketoacyl ACP synthase'	'highly similar to ( 674)AT1G74960| Symbols: KAS2, FAB1 | FAB1 (FATTY ACID BIOSYNTHESIS 1); fatty-acid synthase | chr1:28156225-28159609 REVERSEmoderately similar to ( 393)KASC1_HORVU no original description'
Glyma13g17290.N5	j	PAC:26317516	TSS47553	No	NO Cluster	AT1G74960	'11.1.3'	'lipid metabolism.FA synthesis and FA elongation.ketoacyl ACP synthase'	'highly similar to ( 674)AT1G74960| Symbols: KAS2, FAB1 | FAB1 (FATTY ACID BIOSYNTHESIS 1); fatty-acid synthase | chr1:28156225-28159609 REVERSEmoderately similar to ( 393)KASC1_HORVU no original description'
Glyma13g17290.N6	j	PAC:26317516	TSS47553	No	NO Cluster	AT1G74960	'11.1.3'	'lipid metabolism.FA synthesis and FA elongation.ketoacyl ACP synthase'	'highly similar to ( 674)AT1G74960| Symbols: KAS2, FAB1 | FAB1 (FATTY ACID BIOSYNTHESIS 1); fatty-acid synthase | chr1:28156225-28159609 REVERSEmoderately similar to ( 393)KASC1_HORVU no original description'
Glyma12g22395.1	=	PAC:26293215	TSS46192	Yes	60	NO MapMan Annotation
Glyma12g22395.N2	j	PAC:26293215	TSS46192	No	NO Cluster	NO MapMan Annotation
Glyma09g34780.1	=	PAC:26340346	TSS35088	Yes	51	No Arabidopsis Homolohue	'35.2'	'not assigned.unknown'	'no original description'
Glyma09g34780.N2	j	PAC:26340346	TSS35088	No	NO Cluster	No Arabidopsis Homolohue	'35.2'	'not assigned.unknown'	'no original description'
Glyma16g27440.N2	j	PAC:26352543	TSS61456	No	NO Cluster	AT1G05680	'26.2'	'misc.UDP glucosyl and glucoronyl transferases'	'moderately similar to ( 447)AT1G05680| Symbols: | UDP-glucoronosyl/UDP-glucosyl transferase family protein | chr1:1703195-1704638 REVERSEmoderately similar to ( 345)IAAG_MAIZE no original description'
Glyma16g27440.1	=	PAC:26352543	TSS61457	Yes	36	AT1G05680	'26.2'	'misc.UDP glucosyl and glucoronyl transferases'	'moderately similar to ( 447)AT1G05680| Symbols: | UDP-glucoronosyl/UDP-glucosyl transferase family protein | chr1:1703195-1704638 REVERSEmoderately similar to ( 345)IAAG_MAIZE no original description'
Glyma14g39520.N8	j	PAC:26284549	TSS53503	No	NO Cluster	AT5G16610	'35.2'	'not assigned.unknown'	'moderately similar to ( 357)AT5G16610| Symbols: | similar to unnamed protein product [Vitis vinifera] (GB:CAO44747.1) | chr5:5445071-5447948 REVERSE no original description'
Glyma14g39520.N7	j	PAC:26284549	TSS53502	No	NO Cluster	AT5G16610	'35.2'	'not assigned.unknown'	'moderately similar to ( 357)AT5G16610| Symbols: | similar to unnamed protein product [Vitis vinifera] (GB:CAO44747.1) | chr5:5445071-5447948 REVERSE no original description'
Glyma14g39520.N6	j	PAC:26284549	TSS53501	No	NO Cluster	AT5G16610	'35.2'	'not assigned.unknown'	'moderately similar to ( 357)AT5G16610| Symbols: | similar to unnamed protein product [Vitis vinifera] (GB:CAO44747.1) | chr5:5445071-5447948 REVERSE no original description'
Glyma14g39520.N5	j	PAC:26284549	TSS53500	No	NO Cluster	AT5G16610	'35.2'	'not assigned.unknown'	'moderately similar to ( 357)AT5G16610| Symbols: | similar to unnamed protein product [Vitis vinifera] (GB:CAO44747.1) | chr5:5445071-5447948 REVERSE no original description'
Glyma14g39520.N4	j	PAC:26284549	TSS53500	Yes	38	AT5G16610	'35.2'	'not assigned.unknown'	'moderately similar to ( 357)AT5G16610| Symbols: | similar to unnamed protein product [Vitis vinifera] (GB:CAO44747.1) | chr5:5445071-5447948 REVERSE no original description'
Glyma14g39520.N3	j	PAC:26284549	TSS53500	No	NO Cluster	AT5G16610	'35.2'	'not assigned.unknown'	'moderately similar to ( 357)AT5G16610| Symbols: | similar to unnamed protein product [Vitis vinifera] (GB:CAO44747.1) | chr5:5445071-5447948 REVERSE no original description'
Glyma14g39520.2	=	PAC:26284550	TSS53499	No	NO Cluster	AT5G16610	'35.2'	'not assigned.unknown'	'moderately similar to ( 357)AT5G16610| Symbols: | similar to unnamed protein product [Vitis vinifera] (GB:CAO44747.1) | chr5:5445071-5447948 REVERSE no original description'
Glyma14g39520.1	=	PAC:26284549	TSS53499	No	NO Cluster	AT5G16610	'35.2'	'not assigned.unknown'	'moderately similar to ( 357)AT5G16610| Symbols: | similar to unnamed protein product [Vitis vinifera] (GB:CAO44747.1) | chr5:5445071-5447948 REVERSE no original description'
Glyma14g39520.2	=	PAC:26284550	TSS53499	No	NO Cluster	AT5G16610	'35.2'	'not assigned.unknown'	'moderately similar to ( 357)AT5G16610| Symbols: | similar to unnamed protein product [Vitis vinifera] (GB:CAO44747.1) | chr5:5445071-5447948 REVERSE no original description'
Glyma02g44470.4	=	PAC:26288148	TSS5152	No	NO Cluster	AT2G40830	'29.5.11.4.2'	'protein.degradation.ubiquitin.E3.RING'	'moderately similar to ( 227)AT2G40830| Symbols: RHC1A | RHC1A (RING-H2 finger C1A); protein binding / zinc ion binding | chr2:17050720-17051706 FORWARD no original description'
Glyma02g44470.2	=	PAC:26288149	TSS5152	No	NO Cluster	AT2G40830	'29.5.11.4.2'	'protein.degradation.ubiquitin.E3.RING'	'moderately similar to ( 227)AT2G40830| Symbols: RHC1A | RHC1A (RING-H2 finger C1A); protein binding / zinc ion binding | chr2:17050720-17051706 FORWARD no original description'
Glyma02g44470.N5	j	PAC:26288148	TSS5152	No	NO Cluster	AT2G40830	'29.5.11.4.2'	'protein.degradation.ubiquitin.E3.RING'	'moderately similar to ( 227)AT2G40830| Symbols: RHC1A | RHC1A (RING-H2 finger C1A); protein binding / zinc ion binding | chr2:17050720-17051706 FORWARD no original description'
Glyma02g44470.N6	j	PAC:26288149	TSS5152	No	NO Cluster	AT2G40830	'29.5.11.4.2'	'protein.degradation.ubiquitin.E3.RING'	'moderately similar to ( 227)AT2G40830| Symbols: RHC1A | RHC1A (RING-H2 finger C1A); protein binding / zinc ion binding | chr2:17050720-17051706 FORWARD no original description'
Glyma02g44470.3	=	PAC:26288150	TSS5152	Yes	36	AT2G40830	'29.5.11.4.2'	'protein.degradation.ubiquitin.E3.RING'	'moderately similar to ( 227)AT2G40830| Symbols: RHC1A | RHC1A (RING-H2 finger C1A); protein binding / zinc ion binding | chr2:17050720-17051706 FORWARD no original description'
Glyma04g36870.N4	j	PAC:26305114	TSS12561	Yes	24	AT3G04120	'4.9'	'glycolysis.glyceraldehyde 3-phosphate dehydrogenase'	'highly similar to ( 563)AT3G04120| Symbols: GAPC-1, GAPC | GAPC (GLYCERALDEHYDE-3-PHOSPHATE DEHYDROGENASE C SUBUNIT); glyceraldehyde-3-phosphate dehydrogenase | chr3:1081084-1083138 FORWARDhighly similar to ( 573)G3PC_DIACA no original description'
Glyma04g36870.3	=	PAC:26305114	TSS12561	No	NO Cluster	AT3G04120	'4.9'	'glycolysis.glyceraldehyde 3-phosphate dehydrogenase'	'highly similar to ( 563)AT3G04120| Symbols: GAPC-1, GAPC | GAPC (GLYCERALDEHYDE-3-PHOSPHATE DEHYDROGENASE C SUBUNIT); glyceraldehyde-3-phosphate dehydrogenase | chr3:1081084-1083138 FORWARDhighly similar to ( 573)G3PC_DIACA no original description'
Glyma15g14220.1	=	PAC:26332777	TSS57903	Yes	2	AT1G30690	'34.99'	'transport.misc'	'moderately similar to ( 455)AT1G30690| Symbols: | SEC14 cytosolic factor family protein / phosphoglyceride transfer family protein | chr1:10888266-10890067 FORWARD no original description'
Glyma15g14220.N2	j	PAC:26332777	TSS57903	No	NO Cluster	AT1G30690	'34.99'	'transport.misc'	'moderately similar to ( 455)AT1G30690| Symbols: | SEC14 cytosolic factor family protein / phosphoglyceride transfer family protein | chr1:10888266-10890067 FORWARD no original description'
Glyma15g14220.N3	j	PAC:26332777	TSS57903	No	NO Cluster	AT1G30690	'34.99'	'transport.misc'	'moderately similar to ( 455)AT1G30690| Symbols: | SEC14 cytosolic factor family protein / phosphoglyceride transfer family protein | chr1:10888266-10890067 FORWARD no original description'
Glyma08g10671.N2	j	PAC:26309462	TSS27289	No	NO Cluster	NO MapMan Annotation
Glyma08g10671.1	=	PAC:26309462	TSS27289	Yes	24	NO MapMan Annotation
Glyma04g04020.N4	j	PAC:26304191	TSS11504	No	NO Cluster	AT5G44250	'35.2'	'not assigned.unknown'	'moderately similar to ( 422)AT5G44250| Symbols: | similar to unknown protein [Arabidopsis thaliana] (TAIR:AT2G15695.1); similar to unnamed protein product [Vitis vinifera] (GB:CAO61325.1); contains InterPro domain Protein of unknown function DUF829, eukaryotic (InterPro:IPR008547) | chr5:17841103-17842380 REVERSE no original description'
Glyma04g04020.N3	j	PAC:26304191	TSS11504	No	NO Cluster	AT5G44250	'35.2'	'not assigned.unknown'	'moderately similar to ( 422)AT5G44250| Symbols: | similar to unknown protein [Arabidopsis thaliana] (TAIR:AT2G15695.1); similar to unnamed protein product [Vitis vinifera] (GB:CAO61325.1); contains InterPro domain Protein of unknown function DUF829, eukaryotic (InterPro:IPR008547) | chr5:17841103-17842380 REVERSE no original description'
Glyma04g04020.N8	j	PAC:26304191	TSS11504	No	NO Cluster	AT5G44250	'35.2'	'not assigned.unknown'	'moderately similar to ( 422)AT5G44250| Symbols: | similar to unknown protein [Arabidopsis thaliana] (TAIR:AT2G15695.1); similar to unnamed protein product [Vitis vinifera] (GB:CAO61325.1); contains InterPro domain Protein of unknown function DUF829, eukaryotic (InterPro:IPR008547) | chr5:17841103-17842380 REVERSE no original description'
Glyma04g04020.N7	j	PAC:26304191	TSS11504	No	NO Cluster	AT5G44250	'35.2'	'not assigned.unknown'	'moderately similar to ( 422)AT5G44250| Symbols: | similar to unknown protein [Arabidopsis thaliana] (TAIR:AT2G15695.1); similar to unnamed protein product [Vitis vinifera] (GB:CAO61325.1); contains InterPro domain Protein of unknown function DUF829, eukaryotic (InterPro:IPR008547) | chr5:17841103-17842380 REVERSE no original description'
Glyma04g04020.N6	j	PAC:26304191	TSS11504	No	NO Cluster	AT5G44250	'35.2'	'not assigned.unknown'	'moderately similar to ( 422)AT5G44250| Symbols: | similar to unknown protein [Arabidopsis thaliana] (TAIR:AT2G15695.1); similar to unnamed protein product [Vitis vinifera] (GB:CAO61325.1); contains InterPro domain Protein of unknown function DUF829, eukaryotic (InterPro:IPR008547) | chr5:17841103-17842380 REVERSE no original description'
Glyma04g04020.N5	j	PAC:26304191	TSS11504	No	NO Cluster	AT5G44250	'35.2'	'not assigned.unknown'	'moderately similar to ( 422)AT5G44250| Symbols: | similar to unknown protein [Arabidopsis thaliana] (TAIR:AT2G15695.1); similar to unnamed protein product [Vitis vinifera] (GB:CAO61325.1); contains InterPro domain Protein of unknown function DUF829, eukaryotic (InterPro:IPR008547) | chr5:17841103-17842380 REVERSE no original description'
Glyma04g04020.2	=	PAC:26304191	TSS11504	Yes	72	AT5G44250	'35.2'	'not assigned.unknown'	'moderately similar to ( 422)AT5G44250| Symbols: | similar to unknown protein [Arabidopsis thaliana] (TAIR:AT2G15695.1); similar to unnamed protein product [Vitis vinifera] (GB:CAO61325.1); contains InterPro domain Protein of unknown function DUF829, eukaryotic (InterPro:IPR008547) | chr5:17841103-17842380 REVERSE no original description'
Glyma04g04020.N9	j	PAC:26304191	TSS11504	No	NO Cluster	AT5G44250	'35.2'	'not assigned.unknown'	'moderately similar to ( 422)AT5G44250| Symbols: | similar to unknown protein [Arabidopsis thaliana] (TAIR:AT2G15695.1); similar to unnamed protein product [Vitis vinifera] (GB:CAO61325.1); contains InterPro domain Protein of unknown function DUF829, eukaryotic (InterPro:IPR008547) | chr5:17841103-17842380 REVERSE no original description'
Glyma11g29410.N2	j	PAC:26295541	TSS41366	No	NO Cluster	AT5G58480	'26.4'	'misc.beta 1,3 glucan hydrolases'	'highly similar to ( 591)AT5G58480| Symbols: | glycosyl hydrolase family 17 protein | chr5:23658453-23660052 REVERSEweakly similar to ( 176)E13B_WHEAT no original description'
Glyma11g29410.1	=	PAC:26295541	TSS41365	Yes	12	AT5G58480	'26.4'	'misc.beta 1,3 glucan hydrolases'	'highly similar to ( 591)AT5G58480| Symbols: | glycosyl hydrolase family 17 protein | chr5:23658453-23660052 REVERSEweakly similar to ( 176)E13B_WHEAT no original description'
Glyma13g44130.N6	j	PAC:26318094	TSS49349	No	NO Cluster	AT1G52590	'35.2'	'not assigned.unknown'	'moderately similar to ( 233)AT1G52590| Symbols: | Identical to DCC family protein At1g52590, chloroplast precursor [Arabidopsis Thaliana] (GB:Q9SSR1;GB:Q8L9T1); similar to RNase H domain-containing protein [Arabidopsis thaliana] (TAIR:AT1G24090.1); similar to unnamed protein product [Vitis vinifera] (GB:CAO62758.1); contains InterPro domain Putative thiol-disulphide oxidoreductase DCC (InterPro:…
Glyma13g44130.N5	j	PAC:26318094	TSS49349	No	NO Cluster	AT1G52590	'35.2'	'not assigned.unknown'	'moderately similar to ( 233)AT1G52590| Symbols: | Identical to DCC family protein At1g52590, chloroplast precursor [Arabidopsis Thaliana] (GB:Q9SSR1;GB:Q8L9T1); similar to RNase H domain-containing protein [Arabidopsis thaliana] (TAIR:AT1G24090.1); similar to unnamed protein product [Vitis vinifera] (GB:CAO62758.1); contains InterPro domain Putative thiol-disulphide oxidoreductase DCC (InterPro:…
Glyma13g44130.N4	j	PAC:26318094	TSS49349	No	NO Cluster	AT1G52590	'35.2'	'not assigned.unknown'	'moderately similar to ( 233)AT1G52590| Symbols: | Identical to DCC family protein At1g52590, chloroplast precursor [Arabidopsis Thaliana] (GB:Q9SSR1;GB:Q8L9T1); similar to RNase H domain-containing protein [Arabidopsis thaliana] (TAIR:AT1G24090.1); similar to unnamed protein product [Vitis vinifera] (GB:CAO62758.1); contains InterPro domain Putative thiol-disulphide oxidoreductase DCC (InterPro:…
Glyma13g44130.N3	j	PAC:26318094	TSS49349	No	NO Cluster	AT1G52590	'35.2'	'not assigned.unknown'	'moderately similar to ( 233)AT1G52590| Symbols: | Identical to DCC family protein At1g52590, chloroplast precursor [Arabidopsis Thaliana] (GB:Q9SSR1;GB:Q8L9T1); similar to RNase H domain-containing protein [Arabidopsis thaliana] (TAIR:AT1G24090.1); similar to unnamed protein product [Vitis vinifera] (GB:CAO62758.1); contains InterPro domain Putative thiol-disulphide oxidoreductase DCC (InterPro:…
Glyma13g44130.N2	j	PAC:26318094	TSS49348	No	NO Cluster	AT1G52590	'35.2'	'not assigned.unknown'	'moderately similar to ( 233)AT1G52590| Symbols: | Identical to DCC family protein At1g52590, chloroplast precursor [Arabidopsis Thaliana] (GB:Q9SSR1;GB:Q8L9T1); similar to RNase H domain-containing protein [Arabidopsis thaliana] (TAIR:AT1G24090.1); similar to unnamed protein product [Vitis vinifera] (GB:CAO62758.1); contains InterPro domain Putative thiol-disulphide oxidoreductase DCC (InterPro:…
Glyma13g44130.N7	j	PAC:26318094	TSS49349	No	NO Cluster	AT1G52590	'35.2'	'not assigned.unknown'	'moderately similar to ( 233)AT1G52590| Symbols: | Identical to DCC family protein At1g52590, chloroplast precursor [Arabidopsis Thaliana] (GB:Q9SSR1;GB:Q8L9T1); similar to RNase H domain-containing protein [Arabidopsis thaliana] (TAIR:AT1G24090.1); similar to unnamed protein product [Vitis vinifera] (GB:CAO62758.1); contains InterPro domain Putative thiol-disulphide oxidoreductase DCC (InterPro:…
Glyma13g44130.1	=	PAC:26318094	TSS49349	Yes	112	AT1G52590	'35.2'	'not assigned.unknown'	'moderately similar to ( 233)AT1G52590| Symbols: | Identical to DCC family protein At1g52590, chloroplast precursor [Arabidopsis Thaliana] (GB:Q9SSR1;GB:Q8L9T1); similar to RNase H domain-containing protein [Arabidopsis thaliana] (TAIR:AT1G24090.1); similar to unnamed protein product [Vitis vinifera] (GB:CAO62758.1); contains InterPro domain Putative thiol-disulphide oxidoreductase DCC (InterPro:…
Glyma07g03350.1	=	PAC:26347449	TSS23001	Yes	21	AT3G15820	'26.13'	'misc.acid and other phosphatases'	'moderately similar to ( 351)AT3G15820| Symbols: | phosphatidic acid phosphatase-related / PAP2-related | chr3:5351224-5353580 FORWARD no original description'
Glyma07g03350.N2	j	PAC:26347449	TSS23002	No	NO Cluster	AT3G15820	'26.13'	'misc.acid and other phosphatases'	'moderately similar to ( 351)AT3G15820| Symbols: | phosphatidic acid phosphatase-related / PAP2-related | chr3:5351224-5353580 FORWARD no original description'
Glyma01g43771.N2	j	PAC:26324975	TSS3109	No	NO Cluster	NO MapMan Annotation
Glyma01g43771.1	=	PAC:26324975	TSS3109	Yes	48	NO MapMan Annotation
Glyma19g31220.N3	o	PAC:26327660	TSS70586	No	NO Cluster	AT3G10230	'16.1.4.5'	'secondary metabolism.isoprenoids.carotenoids.lycopene beta cyclase'	'highly similar to ( 787)AT3G10230| Symbols: LYC | LYC (LYCOPENE CYCLASE) | chr3:3164345-3165454 REVERSEhighly similar to ( 841)LCYB_TOBAC no original description'
Glyma19g31220.N2	o	PAC:26327660	TSS70586	No	NO Cluster	AT3G10230	'16.1.4.5'	'secondary metabolism.isoprenoids.carotenoids.lycopene beta cyclase'	'highly similar to ( 787)AT3G10230| Symbols: LYC | LYC (LYCOPENE CYCLASE) | chr3:3164345-3165454 REVERSEhighly similar to ( 841)LCYB_TOBAC no original description'
Glyma19g31220.1	=	PAC:26327660	TSS70586	Yes	25	AT3G10230	'16.1.4.5'	'secondary metabolism.isoprenoids.carotenoids.lycopene beta cyclase'	'highly similar to ( 787)AT3G10230| Symbols: LYC | LYC (LYCOPENE CYCLASE) | chr3:3164345-3165454 REVERSEhighly similar to ( 841)LCYB_TOBAC no original description'
Glyma02g04980.N12	j	PAC:26291100	TSS3639	No	NO Cluster	AT4G35785	'35.2'	'not assigned.unknown'	'weakly similar to ( 120)AT4G35785| Symbols: | transformer serine/arginine-rich ribonucleoprotein, putative | chr4:16953989-16955131 REVERSE no original description'
Glyma02g04980.N11	j	PAC:26291100	TSS3639	No	NO Cluster	AT4G35785	'35.2'	'not assigned.unknown'	'weakly similar to ( 120)AT4G35785| Symbols: | transformer serine/arginine-rich ribonucleoprotein, putative | chr4:16953989-16955131 REVERSE no original description'
Glyma02g04980.N8	j	PAC:26291100	TSS3639	No	NO Cluster	AT4G35785	'35.2'	'not assigned.unknown'	'weakly similar to ( 120)AT4G35785| Symbols: | transformer serine/arginine-rich ribonucleoprotein, putative | chr4:16953989-16955131 REVERSE no original description'
Glyma02g04980.N7	j	PAC:26291100	TSS3639	No	NO Cluster	AT4G35785	'35.2'	'not assigned.unknown'	'weakly similar to ( 120)AT4G35785| Symbols: | transformer serine/arginine-rich ribonucleoprotein, putative | chr4:16953989-16955131 REVERSE no original description'
Glyma02g04980.4	=	PAC:26291099	TSS3639	Yes	62	AT4G35785	'35.2'	'not assigned.unknown'	'weakly similar to ( 120)AT4G35785| Symbols: | transformer serine/arginine-rich ribonucleoprotein, putative | chr4:16953989-16955131 REVERSE no original description'
Glyma02g04980.5	=	PAC:26291100	TSS3639	No	NO Cluster	AT4G35785	'35.2'	'not assigned.unknown'	'weakly similar to ( 120)AT4G35785| Symbols: | transformer serine/arginine-rich ribonucleoprotein, putative | chr4:16953989-16955131 REVERSE no original description'
Glyma02g04980.6	=	PAC:26291101	TSS3639	No	NO Cluster	AT4G35785	'35.2'	'not assigned.unknown'	'weakly similar to ( 120)AT4G35785| Symbols: | transformer serine/arginine-rich ribonucleoprotein, putative | chr4:16953989-16955131 REVERSE no original description'
Glyma02g04980.N13	j	PAC:26291100	TSS3639	No	NO Cluster	AT4G35785	'35.2'	'not assigned.unknown'	'weakly similar to ( 120)AT4G35785| Symbols: | transformer serine/arginine-rich ribonucleoprotein, putative | chr4:16953989-16955131 REVERSE no original description'
Glyma02g04980.N14	j	PAC:26291100	TSS3639	No	NO Cluster	AT4G35785	'35.2'	'not assigned.unknown'	'weakly similar to ( 120)AT4G35785| Symbols: | transformer serine/arginine-rich ribonucleoprotein, putative | chr4:16953989-16955131 REVERSE no original description'
Glyma02g04980.N15	j	PAC:26291100	TSS3639	No	NO Cluster	AT4G35785	'35.2'	'not assigned.unknown'	'weakly similar to ( 120)AT4G35785| Symbols: | transformer serine/arginine-rich ribonucleoprotein, putative | chr4:16953989-16955131 REVERSE no original description'
Glyma02g04980.N16	j	PAC:26291100	TSS3639	No	NO Cluster	AT4G35785	'35.2'	'not assigned.unknown'	'weakly similar to ( 120)AT4G35785| Symbols: | transformer serine/arginine-rich ribonucleoprotein, putative | chr4:16953989-16955131 REVERSE no original description'
Glyma14g14171.N3	j	PAC:26286431	TSS52847	No	NO Cluster	NO MapMan Annotation
Glyma14g14171.N4	j	PAC:26286431	TSS52847	No	NO Cluster	NO MapMan Annotation
Glyma14g14171.N2	j	PAC:26286431	TSS52847	No	NO Cluster	NO MapMan Annotation
Glyma14g14171.1	=	PAC:26286430	TSS52848	Yes	26	NO MapMan Annotation
Glyma14g14171.N5	j	PAC:26286431	TSS52848	No	NO Cluster	NO MapMan Annotation
Glyma14g14171.2	=	PAC:26286431	TSS52848	No	NO Cluster	NO MapMan Annotation
Glyma14g14171.N7	j	PAC:26286431	TSS52848	No	NO Cluster	NO MapMan Annotation
Glyma14g14171.N6	j	PAC:26286431	TSS52848	No	NO Cluster	NO MapMan Annotation
Glyma13g05870.5	=	PAC:26318012	TSS47140	No	NO Cluster	AT3G29270	'29.5.11.4.2'	'protein.degradation.ubiquitin.E3.RING'	'moderately similar to ( 318)AT3G29270| Symbols: | similar to zinc finger (C3HC4-type RING finger) family protein [Arabidopsis thaliana] (TAIR:AT1G69330.1); similar to unnamed protein product [Vitis vinifera] (GB:CAO15044.1); contains InterPro domain Zinc finger, RING/FYVE/PHD-type (InterPro:IPR013083); contains InterPro domain Zinc finger, RING-type; (InterPro:IPR001841) | chr3:11236563-11237354…
Glyma13g05870.N11	x	PAC:26318012	TSS49733	Yes	49	AT3G29270	'29.5.11.4.2'	'protein.degradation.ubiquitin.E3.RING'	'moderately similar to ( 318)AT3G29270| Symbols: | similar to zinc finger (C3HC4-type RING finger) family protein [Arabidopsis thaliana] (TAIR:AT1G69330.1); similar to unnamed protein product [Vitis vinifera] (GB:CAO15044.1); contains InterPro domain Zinc finger, RING/FYVE/PHD-type (InterPro:IPR013083); contains InterPro domain Zinc finger, RING-type; (InterPro:IPR001841) | chr3:11236563-11237354…
Glyma13g05870.N10	j	PAC:26318012	TSS47140	No	NO Cluster	AT3G29270	'29.5.11.4.2'	'protein.degradation.ubiquitin.E3.RING'	'moderately similar to ( 318)AT3G29270| Symbols: | similar to zinc finger (C3HC4-type RING finger) family protein [Arabidopsis thaliana] (TAIR:AT1G69330.1); similar to unnamed protein product [Vitis vinifera] (GB:CAO15044.1); contains InterPro domain Zinc finger, RING/FYVE/PHD-type (InterPro:IPR013083); contains InterPro domain Zinc finger, RING-type; (InterPro:IPR001841) | chr3:11236563-11237354…
Glyma13g05870.N7	j	PAC:26318012	TSS47140	No	NO Cluster	AT3G29270	'29.5.11.4.2'	'protein.degradation.ubiquitin.E3.RING'	'moderately similar to ( 318)AT3G29270| Symbols: | similar to zinc finger (C3HC4-type RING finger) family protein [Arabidopsis thaliana] (TAIR:AT1G69330.1); similar to unnamed protein product [Vitis vinifera] (GB:CAO15044.1); contains InterPro domain Zinc finger, RING/FYVE/PHD-type (InterPro:IPR013083); contains InterPro domain Zinc finger, RING-type; (InterPro:IPR001841) | chr3:11236563-11237354…
Glyma13g05870.6	=	PAC:26318013	TSS47140	No	NO Cluster	AT3G29270	'29.5.11.4.2'	'protein.degradation.ubiquitin.E3.RING'	'moderately similar to ( 318)AT3G29270| Symbols: | similar to zinc finger (C3HC4-type RING finger) family protein [Arabidopsis thaliana] (TAIR:AT1G69330.1); similar to unnamed protein product [Vitis vinifera] (GB:CAO15044.1); contains InterPro domain Zinc finger, RING/FYVE/PHD-type (InterPro:IPR013083); contains InterPro domain Zinc finger, RING-type; (InterPro:IPR001841) | chr3:11236563-11237354…
Glyma13g05870.N9	j	PAC:26318012	TSS47140	No	NO Cluster	AT3G29270	'29.5.11.4.2'	'protein.degradation.ubiquitin.E3.RING'	'moderately similar to ( 318)AT3G29270| Symbols: | similar to zinc finger (C3HC4-type RING finger) family protein [Arabidopsis thaliana] (TAIR:AT1G69330.1); similar to unnamed protein product [Vitis vinifera] (GB:CAO15044.1); contains InterPro domain Zinc finger, RING/FYVE/PHD-type (InterPro:IPR013083); contains InterPro domain Zinc finger, RING-type; (InterPro:IPR001841) | chr3:11236563-11237354…
Glyma13g05870.N8	j	PAC:26318012	TSS47140	No	NO Cluster	AT3G29270	'29.5.11.4.2'	'protein.degradation.ubiquitin.E3.RING'	'moderately similar to ( 318)AT3G29270| Symbols: | similar to zinc finger (C3HC4-type RING finger) family protein [Arabidopsis thaliana] (TAIR:AT1G69330.1); similar to unnamed protein product [Vitis vinifera] (GB:CAO15044.1); contains InterPro domain Zinc finger, RING/FYVE/PHD-type (InterPro:IPR013083); contains InterPro domain Zinc finger, RING-type; (InterPro:IPR001841) | chr3:11236563-11237354…
Glyma16g24310.2	=	PAC:26352371	TSS59849	Yes	58	AT4G36210	'35.2'	'not assigned.unknown'	'highly similar to ( 517)AT4G36210| Symbols: | similar to unknown protein [Arabidopsis thaliana] (TAIR:AT2G18100.1); similar to unnamed protein product [Vitis vinifera] (GB:CAO48261.1); contains InterPro domain Protein of unknown function DUF726 (InterPro:IPR007941) | chr4:17130357-17134305 FORWARD no original description'
Glyma16g24310.N9	j	PAC:26352371	TSS59849	No	NO Cluster	AT4G36210	'35.2'	'not assigned.unknown'	'highly similar to ( 517)AT4G36210| Symbols: | similar to unknown protein [Arabidopsis thaliana] (TAIR:AT2G18100.1); similar to unnamed protein product [Vitis vinifera] (GB:CAO48261.1); contains InterPro domain Protein of unknown function DUF726 (InterPro:IPR007941) | chr4:17130357-17134305 FORWARD no original description'
Glyma16g24310.N10	j	PAC:26352371	TSS59850	No	NO Cluster	AT4G36210	'35.2'	'not assigned.unknown'	'highly similar to ( 517)AT4G36210| Symbols: | similar to unknown protein [Arabidopsis thaliana] (TAIR:AT2G18100.1); similar to unnamed protein product [Vitis vinifera] (GB:CAO48261.1); contains InterPro domain Protein of unknown function DUF726 (InterPro:IPR007941) | chr4:17130357-17134305 FORWARD no original description'
Glyma16g24310.N6	j	PAC:26352371	TSS59849	No	NO Cluster	AT4G36210	'35.2'	'not assigned.unknown'	'highly similar to ( 517)AT4G36210| Symbols: | similar to unknown protein [Arabidopsis thaliana] (TAIR:AT2G18100.1); similar to unnamed protein product [Vitis vinifera] (GB:CAO48261.1); contains InterPro domain Protein of unknown function DUF726 (InterPro:IPR007941) | chr4:17130357-17134305 FORWARD no original description'
Glyma16g24310.N5	j	PAC:26352371	TSS59849	No	NO Cluster	AT4G36210	'35.2'	'not assigned.unknown'	'highly similar to ( 517)AT4G36210| Symbols: | similar to unknown protein [Arabidopsis thaliana] (TAIR:AT2G18100.1); similar to unnamed protein product [Vitis vinifera] (GB:CAO48261.1); contains InterPro domain Protein of unknown function DUF726 (InterPro:IPR007941) | chr4:17130357-17134305 FORWARD no original description'
Glyma16g24310.N8	j	PAC:26352371	TSS59849	No	NO Cluster	AT4G36210	'35.2'	'not assigned.unknown'	'highly similar to ( 517)AT4G36210| Symbols: | similar to unknown protein [Arabidopsis thaliana] (TAIR:AT2G18100.1); similar to unnamed protein product [Vitis vinifera] (GB:CAO48261.1); contains InterPro domain Protein of unknown function DUF726 (InterPro:IPR007941) | chr4:17130357-17134305 FORWARD no original description'
Glyma16g24310.N7	j	PAC:26352371	TSS59849	No	NO Cluster	AT4G36210	'35.2'	'not assigned.unknown'	'highly similar to ( 517)AT4G36210| Symbols: | similar to unknown protein [Arabidopsis thaliana] (TAIR:AT2G18100.1); similar to unnamed protein product [Vitis vinifera] (GB:CAO48261.1); contains InterPro domain Protein of unknown function DUF726 (InterPro:IPR007941) | chr4:17130357-17134305 FORWARD no original description'
Glyma16g24310.N3	j	PAC:26352371	TSS59849	No	NO Cluster	AT4G36210	'35.2'	'not assigned.unknown'	'highly similar to ( 517)AT4G36210| Symbols: | similar to unknown protein [Arabidopsis thaliana] (TAIR:AT2G18100.1); similar to unnamed protein product [Vitis vinifera] (GB:CAO48261.1); contains InterPro domain Protein of unknown function DUF726 (InterPro:IPR007941) | chr4:17130357-17134305 FORWARD no original description'
Glyma16g24310.N4	j	PAC:26352371	TSS59849	No	NO Cluster	AT4G36210	'35.2'	'not assigned.unknown'	'highly similar to ( 517)AT4G36210| Symbols: | similar to unknown protein [Arabidopsis thaliana] (TAIR:AT2G18100.1); similar to unnamed protein product [Vitis vinifera] (GB:CAO48261.1); contains InterPro domain Protein of unknown function DUF726 (InterPro:IPR007941) | chr4:17130357-17134305 FORWARD no original description'
Glyma10g01840.1	=	PAC:26347149	TSS35772	No	NO Cluster	AT4G02120	'23.1.1.10'	'nucleotide metabolism.synthesis.pyrimidine.CTP synthetase'	'highly similar to ( 920)AT4G02120| Symbols: | CTP synthase, putative / UTP--ammonia ligase, putative | chr4:940873-944097 FORWARD no original description'
Glyma10g01840.N13	j	PAC:26347149	TSS35772	No	NO Cluster	AT4G02120	'23.1.1.10'	'nucleotide metabolism.synthesis.pyrimidine.CTP synthetase'	'highly similar to ( 920)AT4G02120| Symbols: | CTP synthase, putative / UTP--ammonia ligase, putative | chr4:940873-944097 FORWARD no original description'
Glyma10g01840.N12	j	PAC:26347149	TSS35772	No	NO Cluster	AT4G02120	'23.1.1.10'	'nucleotide metabolism.synthesis.pyrimidine.CTP synthetase'	'highly similar to ( 920)AT4G02120| Symbols: | CTP synthase, putative / UTP--ammonia ligase, putative | chr4:940873-944097 FORWARD no original description'
Glyma10g01840.N15	j	PAC:26347149	TSS35772	No	NO Cluster	AT4G02120	'23.1.1.10'	'nucleotide metabolism.synthesis.pyrimidine.CTP synthetase'	'highly similar to ( 920)AT4G02120| Symbols: | CTP synthase, putative / UTP--ammonia ligase, putative | chr4:940873-944097 FORWARD no original description'
Glyma10g01840.N14	j	PAC:26347149	TSS35772	No	NO Cluster	AT4G02120	'23.1.1.10'	'nucleotide metabolism.synthesis.pyrimidine.CTP synthetase'	'highly similar to ( 920)AT4G02120| Symbols: | CTP synthase, putative / UTP--ammonia ligase, putative | chr4:940873-944097 FORWARD no original description'
Glyma10g01840.N9	j	PAC:26347149	TSS35772	No	NO Cluster	AT4G02120	'23.1.1.10'	'nucleotide metabolism.synthesis.pyrimidine.CTP synthetase'	'highly similar to ( 920)AT4G02120| Symbols: | CTP synthase, putative / UTP--ammonia ligase, putative | chr4:940873-944097 FORWARD no original description'
Glyma10g01840.N8	j	PAC:26347149	TSS35772	No	NO Cluster	AT4G02120	'23.1.1.10'	'nucleotide metabolism.synthesis.pyrimidine.CTP synthetase'	'highly similar to ( 920)AT4G02120| Symbols: | CTP synthase, putative / UTP--ammonia ligase, putative | chr4:940873-944097 FORWARD no original description'
Glyma10g01840.N11	j	PAC:26347149	TSS35772	No	NO Cluster	AT4G02120	'23.1.1.10'	'nucleotide metabolism.synthesis.pyrimidine.CTP synthetase'	'highly similar to ( 920)AT4G02120| Symbols: | CTP synthase, putative / UTP--ammonia ligase, putative | chr4:940873-944097 FORWARD no original description'
Glyma10g01840.N2	j	PAC:26347149	TSS35772	No	NO Cluster	AT4G02120	'23.1.1.10'	'nucleotide metabolism.synthesis.pyrimidine.CTP synthetase'	'highly similar to ( 920)AT4G02120| Symbols: | CTP synthase, putative / UTP--ammonia ligase, putative | chr4:940873-944097 FORWARD no original description'
Glyma10g01840.N3	j	PAC:26347149	TSS35772	No	NO Cluster	AT4G02120	'23.1.1.10'	'nucleotide metabolism.synthesis.pyrimidine.CTP synthetase'	'highly similar to ( 920)AT4G02120| Symbols: | CTP synthase, putative / UTP--ammonia ligase, putative | chr4:940873-944097 FORWARD no original description'
Glyma10g01840.N4	j	PAC:26347149	TSS35772	Yes	75	AT4G02120	'23.1.1.10'	'nucleotide metabolism.synthesis.pyrimidine.CTP synthetase'	'highly similar to ( 920)AT4G02120| Symbols: | CTP synthase, putative / UTP--ammonia ligase, putative | chr4:940873-944097 FORWARD no original description'
Glyma10g01840.N5	j	PAC:26347149	TSS35772	No	NO Cluster	AT4G02120	'23.1.1.10'	'nucleotide metabolism.synthesis.pyrimidine.CTP synthetase'	'highly similar to ( 920)AT4G02120| Symbols: | CTP synthase, putative / UTP--ammonia ligase, putative | chr4:940873-944097 FORWARD no original description'
Glyma10g01840.N6	j	PAC:26347149	TSS35772	No	NO Cluster	AT4G02120	'23.1.1.10'	'nucleotide metabolism.synthesis.pyrimidine.CTP synthetase'	'highly similar to ( 920)AT4G02120| Symbols: | CTP synthase, putative / UTP--ammonia ligase, putative | chr4:940873-944097 FORWARD no original description'
Glyma10g01840.N7	j	PAC:26347149	TSS35772	No	NO Cluster	AT4G02120	'23.1.1.10'	'nucleotide metabolism.synthesis.pyrimidine.CTP synthetase'	'highly similar to ( 920)AT4G02120| Symbols: | CTP synthase, putative / UTP--ammonia ligase, putative | chr4:940873-944097 FORWARD no original description'
Glyma14g15370.1	=	PAC:26284473	TSS52874	Yes	25	No Arabidopsis Homolohue	'35.2'	'not assigned.unknown'	'no original description'
Glyma14g15370.N2	j	PAC:26284473	TSS52874	No	NO Cluster	No Arabidopsis Homolohue	'35.2'	'not assigned.unknown'	'no original description'
Glyma08g31890.N2	j	PAC:26310126	TSS30962	No	NO Cluster	AT1G68560	'26.3'	'misc.gluco-, galacto- and mannosidases'	'nearly identical (1464)AT1G68560| Symbols: ATXYL1, XYL1 | ATXYL1/XYL1 (ALPHA-XYLOSIDASE 1); alpha-N-arabinofuranosidase/ hydrolase, hydrolyzing O-glycosyl compounds / xylan 1,4-beta-xylosidase | chr1:25738098-25741560 REVERSEhighly similar to ( 814)AGLU_SPIOL no original description'
Glyma08g31890.1	=	PAC:26310126	TSS30962	Yes	21	AT1G68560	'26.3'	'misc.gluco-, galacto- and mannosidases'	'nearly identical (1464)AT1G68560| Symbols: ATXYL1, XYL1 | ATXYL1/XYL1 (ALPHA-XYLOSIDASE 1); alpha-N-arabinofuranosidase/ hydrolase, hydrolyzing O-glycosyl compounds / xylan 1,4-beta-xylosidase | chr1:25738098-25741560 REVERSEhighly similar to ( 814)AGLU_SPIOL no original description'
Glyma08g31890.N3	j	PAC:26310126	TSS30962	No	NO Cluster	AT1G68560	'26.3'	'misc.gluco-, galacto- and mannosidases'	'nearly identical (1464)AT1G68560| Symbols: ATXYL1, XYL1 | ATXYL1/XYL1 (ALPHA-XYLOSIDASE 1); alpha-N-arabinofuranosidase/ hydrolase, hydrolyzing O-glycosyl compounds / xylan 1,4-beta-xylosidase | chr1:25738098-25741560 REVERSEhighly similar to ( 814)AGLU_SPIOL no original description'
Glyma19g03105.N2	j	PAC:26328964	TSS69842	No	NO Cluster	NO MapMan Annotation
Glyma19g03105.N7	j	PAC:26328964	TSS69843	No	NO Cluster	NO MapMan Annotation
Glyma19g03105.N8	j	PAC:26328964	TSS69844	No	NO Cluster	NO MapMan Annotation
Glyma19g03105.N4	j	PAC:26328964	TSS69842	No	NO Cluster	NO MapMan Annotation
Glyma19g03105.N5	j	PAC:26328964	TSS69842	No	NO Cluster	NO MapMan Annotation
Glyma19g03105.N6	j	PAC:26328964	TSS69842	No	NO Cluster	NO MapMan Annotation
Glyma19g03105.1	=	PAC:26328964	TSS69842	Yes	38	NO MapMan Annotation
Glyma19g03105.N3	j	PAC:26328964	TSS69842	No	NO Cluster	NO MapMan Annotation
Glyma08g10010.N2	j	PAC:26307499	TSS29834	No	NO Cluster	AT3G18270	'26.1'	'misc.misc2'	'moderately similar to ( 498)AT3G18270| Symbols: CYP77A5P | CYP77A5P (cytochrome P450, family 77, subfamily A, polypeptide 5 pseudogene); catalytic | chr3:6262016-6264031 FORWARD no original description'
Glyma08g10010.N3	j	PAC:26307499	TSS29834	No	NO Cluster	AT3G18270	'26.1'	'misc.misc2'	'moderately similar to ( 498)AT3G18270| Symbols: CYP77A5P | CYP77A5P (cytochrome P450, family 77, subfamily A, polypeptide 5 pseudogene); catalytic | chr3:6262016-6264031 FORWARD no original description'
Glyma08g10010.1	=	PAC:26307499	TSS29834	Yes	7	AT3G18270	'26.1'	'misc.misc2'	'moderately similar to ( 498)AT3G18270| Symbols: CYP77A5P | CYP77A5P (cytochrome P450, family 77, subfamily A, polypeptide 5 pseudogene); catalytic | chr3:6262016-6264031 FORWARD no original description'
Glyma16g25560.N4	j	PAC:26353193	TSS59899	Yes	106	AT4G16580	'29.4'	'protein.postranslational modification'	'moderately similar to ( 374)AT4G16580| Symbols: | catalytic | chr4:9341174-9342577 REVERSE no original description'
Glyma16g25560.1	=	PAC:26353193	TSS59899	No	NO Cluster	AT4G16580	'29.4'	'protein.postranslational modification'	'moderately similar to ( 374)AT4G16580| Symbols: | catalytic | chr4:9341174-9342577 REVERSE no original description'
Glyma16g25560.N6	j	PAC:26353193	TSS59899	No	NO Cluster	AT4G16580	'29.4'	'protein.postranslational modification'	'moderately similar to ( 374)AT4G16580| Symbols: | catalytic | chr4:9341174-9342577 REVERSE no original description'
Glyma16g25560.N3	j	PAC:26353193	TSS59899	No	NO Cluster	AT4G16580	'29.4'	'protein.postranslational modification'	'moderately similar to ( 374)AT4G16580| Symbols: | catalytic | chr4:9341174-9342577 REVERSE no original description'
Glyma16g25560.1	=	PAC:26353193	TSS59899	No	NO Cluster	AT4G16580	'29.4'	'protein.postranslational modification'	'moderately similar to ( 374)AT4G16580| Symbols: | catalytic | chr4:9341174-9342577 REVERSE no original description'
Glyma16g25560.N5	j	PAC:26353193	TSS59899	No	NO Cluster	AT4G16580	'29.4'	'protein.postranslational modification'	'moderately similar to ( 374)AT4G16580| Symbols: | catalytic | chr4:9341174-9342577 REVERSE no original description'
Glyma16g25560.N2	j	PAC:26353193	TSS59899	No	NO Cluster	AT4G16580	'29.4'	'protein.postranslational modification'	'moderately similar to ( 374)AT4G16580| Symbols: | catalytic | chr4:9341174-9342577 REVERSE no original description'
Glyma12g02320.N2	j	PAC:26294695	TSS43786	No	NO Cluster	AT2G43360	'18.6.1'	'Co-factor and vitamine metabolism.biotin.biotin synthase'	'highly similar to ( 578)AT2G43360| Symbols: BIOB, BIO2 | BIO2 (BIOTIN AUXOTROPH 2); biotin synthase | chr2:18017995-18020206 REVERSE no original description'
Glyma12g02320.N3	j	PAC:26294695	TSS43786	No	NO Cluster	AT2G43360	'18.6.1'	'Co-factor and vitamine metabolism.biotin.biotin synthase'	'highly similar to ( 578)AT2G43360| Symbols: BIOB, BIO2 | BIO2 (BIOTIN AUXOTROPH 2); biotin synthase | chr2:18017995-18020206 REVERSE no original description'
Glyma12g02320.1	=	PAC:26294695	TSS43786	Yes	55	AT2G43360	'18.6.1'	'Co-factor and vitamine metabolism.biotin.biotin synthase'	'highly similar to ( 578)AT2G43360| Symbols: BIOB, BIO2 | BIO2 (BIOTIN AUXOTROPH 2); biotin synthase | chr2:18017995-18020206 REVERSE no original description'
Glyma02g07180.N4	j	PAC:26289040	TSS3765	No	NO Cluster	AT3G54890	'1.1.1.1'	'PS.lightreaction.photosystem II.LHC-II'	'moderately similar to ( 372)AT3G54890| Symbols: LHCA1 | LHCA1 | chr3:20350859-20351900 REVERSEweakly similar to ( 135)CB21_SINAL no original description'
Glyma02g07180.N5	j	PAC:26289040	TSS3765	No	NO Cluster	AT3G54890	'1.1.1.1'	'PS.lightreaction.photosystem II.LHC-II'	'moderately similar to ( 372)AT3G54890| Symbols: LHCA1 | LHCA1 | chr3:20350859-20351900 REVERSEweakly similar to ( 135)CB21_SINAL no original description'
Glyma02g07180.3	=	PAC:26289042	TSS3766	No	NO Cluster	AT3G54890	'1.1.1.1'	'PS.lightreaction.photosystem II.LHC-II'	'moderately similar to ( 372)AT3G54890| Symbols: LHCA1 | LHCA1 | chr3:20350859-20351900 REVERSEweakly similar to ( 135)CB21_SINAL no original description'
Glyma02g07180.2	=	PAC:26289041	TSS3766	No	NO Cluster	AT3G54890	'1.1.1.1'	'PS.lightreaction.photosystem II.LHC-II'	'moderately similar to ( 372)AT3G54890| Symbols: LHCA1 | LHCA1 | chr3:20350859-20351900 REVERSEweakly similar to ( 135)CB21_SINAL no original description'
Glyma02g07180.1	=	PAC:26289040	TSS3766	Yes	18	AT3G54890	'1.1.1.1'	'PS.lightreaction.photosystem II.LHC-II'	'moderately similar to ( 372)AT3G54890| Symbols: LHCA1 | LHCA1 | chr3:20350859-20351900 REVERSEweakly similar to ( 135)CB21_SINAL no original description'
Glyma09g35780.N5	j	PAC:26341984	TSS35146	No	NO Cluster	AT3G10110	'29.3.2'	'protein.targeting.mitochondria'	'weakly similar to ( 156)AT3G10110| Symbols: MEE67 | MEE67 (maternal effect embryo arrest 67); P-P-bond-hydrolysis-driven protein transmembrane transporter | chr3:3116230-3117383 FORWARD no original description'
Glyma09g35780.N6	j	PAC:26341984	TSS35146	No	NO Cluster	AT3G10110	'29.3.2'	'protein.targeting.mitochondria'	'weakly similar to ( 156)AT3G10110| Symbols: MEE67 | MEE67 (maternal effect embryo arrest 67); P-P-bond-hydrolysis-driven protein transmembrane transporter | chr3:3116230-3117383 FORWARD no original description'
Glyma09g35780.N7	j	PAC:26341984	TSS35146	No	NO Cluster	AT3G10110	'29.3.2'	'protein.targeting.mitochondria'	'weakly similar to ( 156)AT3G10110| Symbols: MEE67 | MEE67 (maternal effect embryo arrest 67); P-P-bond-hydrolysis-driven protein transmembrane transporter | chr3:3116230-3117383 FORWARD no original description'
Glyma09g35780.1	=	PAC:26341984	TSS35146	Yes	108	AT3G10110	'29.3.2'	'protein.targeting.mitochondria'	'weakly similar to ( 156)AT3G10110| Symbols: MEE67 | MEE67 (maternal effect embryo arrest 67); P-P-bond-hydrolysis-driven protein transmembrane transporter | chr3:3116230-3117383 FORWARD no original description'
Glyma09g35780.N8	j	PAC:26341984	TSS35146	No	NO Cluster	AT3G10110	'29.3.2'	'protein.targeting.mitochondria'	'weakly similar to ( 156)AT3G10110| Symbols: MEE67 | MEE67 (maternal effect embryo arrest 67); P-P-bond-hydrolysis-driven protein transmembrane transporter | chr3:3116230-3117383 FORWARD no original description'
Glyma09g35780.N9	j	PAC:26341984	TSS35146	No	NO Cluster	AT3G10110	'29.3.2'	'protein.targeting.mitochondria'	'weakly similar to ( 156)AT3G10110| Symbols: MEE67 | MEE67 (maternal effect embryo arrest 67); P-P-bond-hydrolysis-driven protein transmembrane transporter | chr3:3116230-3117383 FORWARD no original description'
Glyma09g35780.N10	j	PAC:26341984	TSS35146	No	NO Cluster	AT3G10110	'29.3.2'	'protein.targeting.mitochondria'	'weakly similar to ( 156)AT3G10110| Symbols: MEE67 | MEE67 (maternal effect embryo arrest 67); P-P-bond-hydrolysis-driven protein transmembrane transporter | chr3:3116230-3117383 FORWARD no original description'
Glyma09g35780.N11	j	PAC:26341984	TSS35146	No	NO Cluster	AT3G10110	'29.3.2'	'protein.targeting.mitochondria'	'weakly similar to ( 156)AT3G10110| Symbols: MEE67 | MEE67 (maternal effect embryo arrest 67); P-P-bond-hydrolysis-driven protein transmembrane transporter | chr3:3116230-3117383 FORWARD no original description'
Glyma09g35780.N12	j	PAC:26341984	TSS35146	No	NO Cluster	AT3G10110	'29.3.2'	'protein.targeting.mitochondria'	'weakly similar to ( 156)AT3G10110| Symbols: MEE67 | MEE67 (maternal effect embryo arrest 67); P-P-bond-hydrolysis-driven protein transmembrane transporter | chr3:3116230-3117383 FORWARD no original description'
Glyma09g35780.N2	s	PAC:26341984	TSS33231	No	NO Cluster	AT3G10110	'29.3.2'	'protein.targeting.mitochondria'	'weakly similar to ( 156)AT3G10110| Symbols: MEE67 | MEE67 (maternal effect embryo arrest 67); P-P-bond-hydrolysis-driven protein transmembrane transporter | chr3:3116230-3117383 FORWARD no original description'
Glyma09g35780.N4	j	PAC:26341984	TSS35146	No	NO Cluster	AT3G10110	'29.3.2'	'protein.targeting.mitochondria'	'weakly similar to ( 156)AT3G10110| Symbols: MEE67 | MEE67 (maternal effect embryo arrest 67); P-P-bond-hydrolysis-driven protein transmembrane transporter | chr3:3116230-3117383 FORWARD no original description'
Glyma09g35780.N3	j	PAC:26341984	TSS35146	No	NO Cluster	AT3G10110	'29.3.2'	'protein.targeting.mitochondria'	'weakly similar to ( 156)AT3G10110| Symbols: MEE67 | MEE67 (maternal effect embryo arrest 67); P-P-bond-hydrolysis-driven protein transmembrane transporter | chr3:3116230-3117383 FORWARD no original description'
Glyma05g07870.2	=	PAC:26322233	TSS15212	No	NO Cluster	AT5G34930	'13.1.6.4.1'	'amino acid metabolism.synthesis.aromatic aa.tyrosine.arogenate dehydrogenase \& prephenate dehydrogenase'	'highly similar to ( 825)AT5G34930| Symbols: | arogenate dehydrogenase | chr5:13250621-13252752 FORWARD no original description'
Glyma05g07870.1	=	PAC:26322234	TSS15212	Yes	23	AT5G34930	'13.1.6.4.1'	'amino acid metabolism.synthesis.aromatic aa.tyrosine.arogenate dehydrogenase \& prephenate dehydrogenase'	'highly similar to ( 825)AT5G34930| Symbols: | arogenate dehydrogenase | chr5:13250621-13252752 FORWARD no original description'
Glyma02g03550.4	=	PAC:26290000	TSS5579	No	NO Cluster	AT1G60030	'34.99'	'transport.misc'	'highly similar to ( 868)AT1G60030| Symbols: | xanthine/uracil permease family protein | chr1:22117658-22120313 REVERSE no original description'
Glyma02g03550.3	=	PAC:26289999	TSS5579	No	NO Cluster	AT1G60030	'34.99'	'transport.misc'	'highly similar to ( 868)AT1G60030| Symbols: | xanthine/uracil permease family protein | chr1:22117658-22120313 REVERSE no original description'
Glyma02g03550.5	=	PAC:26289996	TSS5578	Yes	9	AT1G60030	'34.99'	'transport.misc'	'highly similar to ( 868)AT1G60030| Symbols: | xanthine/uracil permease family protein | chr1:22117658-22120313 REVERSE no original description'
Glyma02g03550.2	=	PAC:26289998	TSS5579	No	NO Cluster	AT1G60030	'34.99'	'transport.misc'	'highly similar to ( 868)AT1G60030| Symbols: | xanthine/uracil permease family protein | chr1:22117658-22120313 REVERSE no original description'
Glyma02g03550.6	=	PAC:26289997	TSS5579	No	NO Cluster	AT1G60030	'34.99'	'transport.misc'	'highly similar to ( 868)AT1G60030| Symbols: | xanthine/uracil permease family protein | chr1:22117658-22120313 REVERSE no original description'
Glyma08g37521.N2	j	PAC:26307161	TSS28584	No	NO Cluster	NO MapMan Annotation
Glyma08g37521.N4	j	PAC:26307161	TSS28584	No	NO Cluster	NO MapMan Annotation
Glyma08g37521.N3	j	PAC:26307161	TSS28584	No	NO Cluster	NO MapMan Annotation
Glyma08g37521.N6	j	PAC:26307161	TSS28584	No	NO Cluster	NO MapMan Annotation
Glyma08g37521.N5	j	PAC:26307161	TSS28584	No	NO Cluster	NO MapMan Annotation
Glyma08g37521.N17	s	PAC:26307161	TSS31034	No	NO Cluster	NO MapMan Annotation
Glyma08g37521.N16	j	PAC:26307161	TSS28585	No	NO Cluster	NO MapMan Annotation
Glyma08g37521.N7	j	PAC:26307161	TSS28584	No	NO Cluster	NO MapMan Annotation
Glyma08g37521.N8	j	PAC:26307161	TSS28584	No	NO Cluster	NO MapMan Annotation
Glyma08g37521.N9	j	PAC:26307161	TSS28584	No	NO Cluster	NO MapMan Annotation
Glyma08g37521.N10	j	PAC:26307161	TSS28584	No	NO Cluster	NO MapMan Annotation
Glyma08g37521.N11	j	PAC:26307161	TSS28584	No	NO Cluster	NO MapMan Annotation
Glyma08g37521.N12	j	PAC:26307161	TSS28584	No	NO Cluster	NO MapMan Annotation
Glyma08g37521.N13	j	PAC:26307161	TSS28584	No	NO Cluster	NO MapMan Annotation
Glyma08g37521.N14	j	PAC:26307161	TSS28584	Yes	27	NO MapMan Annotation
Glyma08g37521.1	=	PAC:26307161	TSS28584	No	NO Cluster	NO MapMan Annotation
Glyma08g37521.N15	j	PAC:26307161	TSS28585	No	NO Cluster	NO MapMan Annotation
Glyma03g40990.N4	j	PAC:26335962	TSS11095	No	NO Cluster	AT4G19400	'35.2'	'not assigned.unknown'	'moderately similar to ( 216)AT4G19400| Symbols: | actin binding | chr4:10581048-10581920 REVERSE no original description'
Glyma03g40990.N3	j	PAC:26335962	TSS11095	No	NO Cluster	AT4G19400	'35.2'	'not assigned.unknown'	'moderately similar to ( 216)AT4G19400| Symbols: | actin binding | chr4:10581048-10581920 REVERSE no original description'
Glyma03g40990.N2	j	PAC:26335962	TSS11094	No	NO Cluster	AT4G19400	'35.2'	'not assigned.unknown'	'moderately similar to ( 216)AT4G19400| Symbols: | actin binding | chr4:10581048-10581920 REVERSE no original description'
Glyma03g40990.1	=	PAC:26335962	TSS11095	Yes	34	AT4G19400	'35.2'	'not assigned.unknown'	'moderately similar to ( 216)AT4G19400| Symbols: | actin binding | chr4:10581048-10581920 REVERSE no original description'
Glyma03g40990.N5	j	PAC:26335962	TSS11095	No	NO Cluster	AT4G19400	'35.2'	'not assigned.unknown'	'moderately similar to ( 216)AT4G19400| Symbols: | actin binding | chr4:10581048-10581920 REVERSE no original description'
Glyma02g40750.N2	j	PAC:26291410	TSS7014	No	NO Cluster	AT1G65910	'33.99'	'development.unspecified'	'moderately similar to ( 440)AT1G65910| Symbols: ANAC028 | ANAC028 (Arabidopsis NAC domain containing protein 28); transcription factor | chr1:24524596-24527771 REVERSEmoderately similar to ( 218)NAC74_ORYSA no original description'
Glyma02g40750.N3	j	PAC:26291410	TSS7014	No	NO Cluster	AT1G65910	'33.99'	'development.unspecified'	'moderately similar to ( 440)AT1G65910| Symbols: ANAC028 | ANAC028 (Arabidopsis NAC domain containing protein 28); transcription factor | chr1:24524596-24527771 REVERSEmoderately similar to ( 218)NAC74_ORYSA no original description'
Glyma02g40750.1	=	PAC:26291410	TSS7014	Yes	74	AT1G65910	'33.99'	'development.unspecified'	'moderately similar to ( 440)AT1G65910| Symbols: ANAC028 | ANAC028 (Arabidopsis NAC domain containing protein 28); transcription factor | chr1:24524596-24527771 REVERSEmoderately similar to ( 218)NAC74_ORYSA no original description'
Glyma02g40750.N4	j	PAC:26291410	TSS7014	No	NO Cluster	AT1G65910	'33.99'	'development.unspecified'	'moderately similar to ( 440)AT1G65910| Symbols: ANAC028 | ANAC028 (Arabidopsis NAC domain containing protein 28); transcription factor | chr1:24524596-24527771 REVERSEmoderately similar to ( 218)NAC74_ORYSA no original description'
Glyma02g40750.N5	j	PAC:26291410	TSS7014	No	NO Cluster	AT1G65910	'33.99'	'development.unspecified'	'moderately similar to ( 440)AT1G65910| Symbols: ANAC028 | ANAC028 (Arabidopsis NAC domain containing protein 28); transcription factor | chr1:24524596-24527771 REVERSEmoderately similar to ( 218)NAC74_ORYSA no original description'
Glyma12g10780.1	=	PAC:26292001	TSS45878	Yes	80	AT3G21720	'6.9'	'gluconeogenese/ glyoxylate cycle.isocitrate lyase'	'highly similar to ( 876)AT3G21720| Symbols: | isocitrate lyase, putative | chr3:7652796-7655880 REVERSEnearly identical (1061)ACEA2_SOYBN no original description'
Glyma12g10780.N2	j	PAC:26292001	TSS45878	No	NO Cluster	AT3G21720	'6.9'	'gluconeogenese/ glyoxylate cycle.isocitrate lyase'	'highly similar to ( 876)AT3G21720| Symbols: | isocitrate lyase, putative | chr3:7652796-7655880 REVERSEnearly identical (1061)ACEA2_SOYBN no original description'
Glyma17g34520.N3	j	PAC:26313032	TSS63577	No	NO Cluster	AT2G26180	'30.3'	'signalling.calcium'	'moderately similar to ( 272)AT2G26180| Symbols: IQD6 | IQD6 (IQ-domain 6); calmodulin binding | chr2:11150511-11152060 REVERSE no original description'
Glyma17g34520.2	=	PAC:26313032	TSS63577	Yes	6	AT2G26180	'30.3'	'signalling.calcium'	'moderately similar to ( 272)AT2G26180| Symbols: IQD6 | IQD6 (IQ-domain 6); calmodulin binding | chr2:11150511-11152060 REVERSE no original description'
Glyma18g17214.N2	j	PAC:26355847	TSS66480	No	NO Cluster	NO MapMan Annotation
Glyma18g17214.N3	j	PAC:26355847	TSS66480	No	NO Cluster	NO MapMan Annotation
Glyma18g17214.N4	j	PAC:26355847	TSS66480	No	NO Cluster	NO MapMan Annotation
Glyma18g17214.1	=	PAC:26355847	TSS66480	No	NO Cluster	NO MapMan Annotation
Glyma18g17214.N5	j	PAC:26355847	TSS66480	No	NO Cluster	NO MapMan Annotation
Glyma18g17214.N6	j	PAC:26355847	TSS66480	No	NO Cluster	NO MapMan Annotation
Glyma18g17214.N7	j	PAC:26355847	TSS66480	No	NO Cluster	NO MapMan Annotation
Glyma18g17214.N8	j	PAC:26355847	TSS66480	No	NO Cluster	NO MapMan Annotation
Glyma18g17214.N9	j	PAC:26355847	TSS66480	No	NO Cluster	NO MapMan Annotation
Glyma18g17214.N10	j	PAC:26355847	TSS66480	No	NO Cluster	NO MapMan Annotation
Glyma18g17214.N16	j	PAC:26355847	TSS66481	No	NO Cluster	NO MapMan Annotation
Glyma18g17214.N15	j	PAC:26355847	TSS66481	No	NO Cluster	NO MapMan Annotation
Glyma18g17214.N17	j	PAC:26355847	TSS66481	No	NO Cluster	NO MapMan Annotation
Glyma18g17214.N12	j	PAC:26355847	TSS66481	No	NO Cluster	NO MapMan Annotation
Glyma18g17214.N11	j	PAC:26355847	TSS66481	Yes	83	NO MapMan Annotation
Glyma18g17214.N14	j	PAC:26355847	TSS66481	No	NO Cluster	NO MapMan Annotation
Glyma18g17214.N13	j	PAC:26355847	TSS66481	No	NO Cluster	NO MapMan Annotation
Glyma11g34550.N3	j	PAC:26297670	TSS41582	No	NO Cluster	AT2G39770	'10.1.1.1'	'cell wall.precursor synthesis.NDP sugar pyrophosphorylase.GDP mannose'	'highly similar to ( 667)AT2G39770| Symbols: VTC1, SOZ1, EMB101, GMP1, CYT1 | CYT1 (CYTOKINESIS DEFECTIVE 1); nucleotidyltransferase | chr2:16596479-16597819 FORWARD no original description'
Glyma11g34550.N4	j	PAC:26297670	TSS41583	No	NO Cluster	AT2G39770	'10.1.1.1'	'cell wall.precursor synthesis.NDP sugar pyrophosphorylase.GDP mannose'	'highly similar to ( 667)AT2G39770| Symbols: VTC1, SOZ1, EMB101, GMP1, CYT1 | CYT1 (CYTOKINESIS DEFECTIVE 1); nucleotidyltransferase | chr2:16596479-16597819 FORWARD no original description'
Glyma11g34550.2	=	PAC:26297669	TSS41582	No	NO Cluster	AT2G39770	'10.1.1.1'	'cell wall.precursor synthesis.NDP sugar pyrophosphorylase.GDP mannose'	'highly similar to ( 667)AT2G39770| Symbols: VTC1, SOZ1, EMB101, GMP1, CYT1 | CYT1 (CYTOKINESIS DEFECTIVE 1); nucleotidyltransferase | chr2:16596479-16597819 FORWARD no original description'
Glyma11g34550.1	=	PAC:26297670	TSS41582	Yes	69	AT2G39770	'10.1.1.1'	'cell wall.precursor synthesis.NDP sugar pyrophosphorylase.GDP mannose'	'highly similar to ( 667)AT2G39770| Symbols: VTC1, SOZ1, EMB101, GMP1, CYT1 | CYT1 (CYTOKINESIS DEFECTIVE 1); nucleotidyltransferase | chr2:16596479-16597819 FORWARD no original description'
Glyma11g34550.N5	j	PAC:26297670	TSS41583	No	NO Cluster	AT2G39770	'10.1.1.1'	'cell wall.precursor synthesis.NDP sugar pyrophosphorylase.GDP mannose'	'highly similar to ( 667)AT2G39770| Symbols: VTC1, SOZ1, EMB101, GMP1, CYT1 | CYT1 (CYTOKINESIS DEFECTIVE 1); nucleotidyltransferase | chr2:16596479-16597819 FORWARD no original description'
Glyma12g06406.N4	j	PAC:26293496	TSS45633	No	NO Cluster	NO MapMan Annotation
Glyma12g06406.3	=	PAC:26293496	TSS45633	No	NO Cluster	NO MapMan Annotation
Glyma12g06406.2	=	PAC:26293495	TSS45633	No	NO Cluster	NO MapMan Annotation
Glyma12g06406.1	=	PAC:26293494	TSS45633	No	NO Cluster	NO MapMan Annotation
Glyma12g06406.N5	j	PAC:26293496	TSS45633	Yes	38	NO MapMan Annotation
Glyma02g44040.N2	j	PAC:26287923	TSS7210	No	NO Cluster	AT5G20990	'18.1.1'	'Co-factor and vitamine metabolism.molybdenum cofactor.gephyrin'	'highly similar to ( 871)AT5G20990| Symbols: SIR4, CNX, CHL6, CNX1, B73 | B73 (CHLORATE RESISTANT 6); molybdenum ion binding | chr5:7128739-7133399 REVERSE no original description'
Glyma02g44040.1	=	PAC:26287923	TSS7211	Yes	58	AT5G20990	'18.1.1'	'Co-factor and vitamine metabolism.molybdenum cofactor.gephyrin'	'highly similar to ( 871)AT5G20990| Symbols: SIR4, CNX, CHL6, CNX1, B73 | B73 (CHLORATE RESISTANT 6); molybdenum ion binding | chr5:7128739-7133399 REVERSE no original description'
Glyma02g44040.N3	j	PAC:26287923	TSS7210	No	NO Cluster	AT5G20990	'18.1.1'	'Co-factor and vitamine metabolism.molybdenum cofactor.gephyrin'	'highly similar to ( 871)AT5G20990| Symbols: SIR4, CNX, CHL6, CNX1, B73 | B73 (CHLORATE RESISTANT 6); molybdenum ion binding | chr5:7128739-7133399 REVERSE no original description'
Glyma08g06090.2	=	PAC:26309918	TSS29617	No	NO Cluster	AT3G17790	'26.13'	'misc.acid and other phosphatases'	'moderately similar to ( 461)AT3G17790| Symbols: ATPAP17, PAP17, ATACP5 | ATACP5 (acid phosphatase 5); acid phosphatase/ protein serine/threonine phosphatase | chr3:6089785-6090994 FORWARD no original description'
Glyma08g06090.3	=	PAC:26309919	TSS29617	No	NO Cluster	AT3G17790	'26.13'	'misc.acid and other phosphatases'	'moderately similar to ( 461)AT3G17790| Symbols: ATPAP17, PAP17, ATACP5 | ATACP5 (acid phosphatase 5); acid phosphatase/ protein serine/threonine phosphatase | chr3:6089785-6090994 FORWARD no original description'
Glyma08g06090.1	=	PAC:26309917	TSS29617	Yes	8	AT3G17790	'26.13'	'misc.acid and other phosphatases'	'moderately similar to ( 461)AT3G17790| Symbols: ATPAP17, PAP17, ATACP5 | ATACP5 (acid phosphatase 5); acid phosphatase/ protein serine/threonine phosphatase | chr3:6089785-6090994 FORWARD no original description'
Glyma15g06020.N2	j	PAC:26331546	TSS57390	No	NO Cluster	AT4G33510	'13.1.6.1.1'	'amino acid metabolism.synthesis.aromatic aa.chorismate.3-deoxy-D-arabino-heptulosonate 7-phosphate synthase'	'highly similar to ( 843)AT4G33510| Symbols: DHS2 | DHS2 (3-DEOXY-D-ARABINO-HEPTULOSONATE 7-PHOSPHATE SYNTHASE) | chr4:16116499-16118236 FORWARDhighly similar to ( 830)AROF_TOBAC no original description'
Glyma15g06020.N3	j	PAC:26331546	TSS57390	No	NO Cluster	AT4G33510	'13.1.6.1.1'	'amino acid metabolism.synthesis.aromatic aa.chorismate.3-deoxy-D-arabino-heptulosonate 7-phosphate synthase'	'highly similar to ( 843)AT4G33510| Symbols: DHS2 | DHS2 (3-DEOXY-D-ARABINO-HEPTULOSONATE 7-PHOSPHATE SYNTHASE) | chr4:16116499-16118236 FORWARDhighly similar to ( 830)AROF_TOBAC no original description'
Glyma15g06020.1	=	PAC:26331546	TSS57390	Yes	93	AT4G33510	'13.1.6.1.1'	'amino acid metabolism.synthesis.aromatic aa.chorismate.3-deoxy-D-arabino-heptulosonate 7-phosphate synthase'	'highly similar to ( 843)AT4G33510| Symbols: DHS2 | DHS2 (3-DEOXY-D-ARABINO-HEPTULOSONATE 7-PHOSPHATE SYNTHASE) | chr4:16116499-16118236 FORWARDhighly similar to ( 830)AROF_TOBAC no original description'
Glyma03g16140.1	=	PAC:26334846	TSS8090	Yes	11	AT5G33370	'26.28'	'misc.GDSL-motif lipase'	'highly similar to ( 555)AT5G33370| Symbols: | GDSL-motif lipase/hydrolase family protein | chr5:12620094-12621900 REVERSEweakly similar to ( 160)APG_BRANA no original description'
Glyma03g16140.N2	j	PAC:26334846	TSS8090	No	NO Cluster	AT5G33370	'26.28'	'misc.GDSL-motif lipase'	'highly similar to ( 555)AT5G33370| Symbols: | GDSL-motif lipase/hydrolase family protein | chr5:12620094-12621900 REVERSEweakly similar to ( 160)APG_BRANA no original description'
Glyma04g36250.1	=	PAC:26304593	TSS14224	Yes	65	AT4G20360	'29.2.4'	'protein.synthesis.elongation'	'highly similar to ( 680)AT4G20360| Symbols: AtRab8D, AtRABE1b | AtRABE1b/AtRab8D (Arabidopsis Rab GTPase homolog E1b); translation elongation factor | chr4:10990047-10991477 FORWARDhighly similar to ( 743)EFTU1_SOYBN no original description'
Glyma04g36250.N2	j	PAC:26304593	TSS14224	No	NO Cluster	AT4G20360	'29.2.4'	'protein.synthesis.elongation'	'highly similar to ( 680)AT4G20360| Symbols: AtRab8D, AtRABE1b | AtRABE1b/AtRab8D (Arabidopsis Rab GTPase homolog E1b); translation elongation factor | chr4:10990047-10991477 FORWARDhighly similar to ( 743)EFTU1_SOYBN no original description'
Glyma04g36250.N3	j	PAC:26304593	TSS14224	No	NO Cluster	AT4G20360	'29.2.4'	'protein.synthesis.elongation'	'highly similar to ( 680)AT4G20360| Symbols: AtRab8D, AtRABE1b | AtRABE1b/AtRab8D (Arabidopsis Rab GTPase homolog E1b); translation elongation factor | chr4:10990047-10991477 FORWARDhighly similar to ( 743)EFTU1_SOYBN no original description'
Glyma20g15460.6	=	PAC:26338726	TSS75449	No	NO Cluster	AT3G22290	'21.1'	'redox.thioredoxin'	'highly similar to ( 567)AT3G22290| Symbols: | similar to unknown protein [Arabidopsis thaliana] (TAIR:AT1G36050.1); similar to unknown [Populus trichocarpa] (GB:ABK93267.1); contains InterPro domain Protein of unknown function DUF1692 (InterPro:IPR012936) | chr3:7882089-7885267 FORWARD no original description'
Glyma20g15460.5	=	PAC:26338725	TSS75449	Yes	71	AT3G22290	'21.1'	'redox.thioredoxin'	'highly similar to ( 567)AT3G22290| Symbols: | similar to unknown protein [Arabidopsis thaliana] (TAIR:AT1G36050.1); similar to unknown [Populus trichocarpa] (GB:ABK93267.1); contains InterPro domain Protein of unknown function DUF1692 (InterPro:IPR012936) | chr3:7882089-7885267 FORWARD no original description'
Glyma20g15460.4	=	PAC:26338724	TSS75449	No	NO Cluster	AT3G22290	'21.1'	'redox.thioredoxin'	'highly similar to ( 567)AT3G22290| Symbols: | similar to unknown protein [Arabidopsis thaliana] (TAIR:AT1G36050.1); similar to unknown [Populus trichocarpa] (GB:ABK93267.1); contains InterPro domain Protein of unknown function DUF1692 (InterPro:IPR012936) | chr3:7882089-7885267 FORWARD no original description'
Glyma10g18420.1	=	PAC:26345832	TSS36443	No	NO Cluster	NO MapMan Annotation
Glyma10g18420.N2	j	PAC:26345832	TSS36444	Yes	16	NO MapMan Annotation
Glyma04g42010.N8	j	PAC:26303871	TSS12926	No	NO Cluster	AT1G77090	'1.1.1.2'	'PS.lightreaction.photosystem II.PSII polypeptide subunits'	'moderately similar to ( 357)AT1G77090| Symbols: | thylakoid lumenal 29.8 kDa protein | chr1:28965470-28966769 REVERSE no original description'
Glyma04g42010.N7	j	PAC:26303871	TSS12926	No	NO Cluster	AT1G77090	'1.1.1.2'	'PS.lightreaction.photosystem II.PSII polypeptide subunits'	'moderately similar to ( 357)AT1G77090| Symbols: | thylakoid lumenal 29.8 kDa protein | chr1:28965470-28966769 REVERSE no original description'
Glyma04g42010.N6	j	PAC:26303871	TSS12926	No	NO Cluster	AT1G77090	'1.1.1.2'	'PS.lightreaction.photosystem II.PSII polypeptide subunits'	'moderately similar to ( 357)AT1G77090| Symbols: | thylakoid lumenal 29.8 kDa protein | chr1:28965470-28966769 REVERSE no original description'
Glyma04g42010.2	=	PAC:26303871	TSS12926	Yes	108	AT1G77090	'1.1.1.2'	'PS.lightreaction.photosystem II.PSII polypeptide subunits'	'moderately similar to ( 357)AT1G77090| Symbols: | thylakoid lumenal 29.8 kDa protein | chr1:28965470-28966769 REVERSE no original description'
Glyma04g42010.N4	j	PAC:26303871	TSS12925	No	NO Cluster	AT1G77090	'1.1.1.2'	'PS.lightreaction.photosystem II.PSII polypeptide subunits'	'moderately similar to ( 357)AT1G77090| Symbols: | thylakoid lumenal 29.8 kDa protein | chr1:28965470-28966769 REVERSE no original description'
Glyma04g42010.N5	j	PAC:26303871	TSS12925	No	NO Cluster	AT1G77090	'1.1.1.2'	'PS.lightreaction.photosystem II.PSII polypeptide subunits'	'moderately similar to ( 357)AT1G77090| Symbols: | thylakoid lumenal 29.8 kDa protein | chr1:28965470-28966769 REVERSE no original description'
Glyma04g42010.N3	j	PAC:26303871	TSS12925	No	NO Cluster	AT1G77090	'1.1.1.2'	'PS.lightreaction.photosystem II.PSII polypeptide subunits'	'moderately similar to ( 357)AT1G77090| Symbols: | thylakoid lumenal 29.8 kDa protein | chr1:28965470-28966769 REVERSE no original description'
Glyma18g03830.1	=	PAC:26355568	TSS65844	Yes	26	AT2G39800	'13.1.2.2'	'amino acid metabolism.synthesis.glutamate family.proline'	'nearly identical (1002)AT2G39800| Symbols: ATP5CS, P5CS1 | P5CS1 (DELTA1-PYRROLINE-5-CARBOXYLATE SYNTHASE 1) | chr2:16605594-16610017 REVERSEnearly identical (1034)P5CS_ACTCH no original description'
Glyma18g03830.N6	j	PAC:26355568	TSS65844	No	NO Cluster	AT2G39800	'13.1.2.2'	'amino acid metabolism.synthesis.glutamate family.proline'	'nearly identical (1002)AT2G39800| Symbols: ATP5CS, P5CS1 | P5CS1 (DELTA1-PYRROLINE-5-CARBOXYLATE SYNTHASE 1) | chr2:16605594-16610017 REVERSEnearly identical (1034)P5CS_ACTCH no original description'
Glyma18g03830.N5	j	PAC:26355568	TSS65844	No	NO Cluster	AT2G39800	'13.1.2.2'	'amino acid metabolism.synthesis.glutamate family.proline'	'nearly identical (1002)AT2G39800| Symbols: ATP5CS, P5CS1 | P5CS1 (DELTA1-PYRROLINE-5-CARBOXYLATE SYNTHASE 1) | chr2:16605594-16610017 REVERSEnearly identical (1034)P5CS_ACTCH no original description'
Glyma18g03830.N7	j	PAC:26355568	TSS65844	No	NO Cluster	AT2G39800	'13.1.2.2'	'amino acid metabolism.synthesis.glutamate family.proline'	'nearly identical (1002)AT2G39800| Symbols: ATP5CS, P5CS1 | P5CS1 (DELTA1-PYRROLINE-5-CARBOXYLATE SYNTHASE 1) | chr2:16605594-16610017 REVERSEnearly identical (1034)P5CS_ACTCH no original description'
Glyma18g03830.N8	j	PAC:26355568	TSS65844	No	NO Cluster	AT2G39800	'13.1.2.2'	'amino acid metabolism.synthesis.glutamate family.proline'	'nearly identical (1002)AT2G39800| Symbols: ATP5CS, P5CS1 | P5CS1 (DELTA1-PYRROLINE-5-CARBOXYLATE SYNTHASE 1) | chr2:16605594-16610017 REVERSEnearly identical (1034)P5CS_ACTCH no original description'
Glyma18g03830.N2	j	PAC:26355568	TSS65844	No	NO Cluster	AT2G39800	'13.1.2.2'	'amino acid metabolism.synthesis.glutamate family.proline'	'nearly identical (1002)AT2G39800| Symbols: ATP5CS, P5CS1 | P5CS1 (DELTA1-PYRROLINE-5-CARBOXYLATE SYNTHASE 1) | chr2:16605594-16610017 REVERSEnearly identical (1034)P5CS_ACTCH no original description'
Glyma18g03830.N4	j	PAC:26355568	TSS65844	No	NO Cluster	AT2G39800	'13.1.2.2'	'amino acid metabolism.synthesis.glutamate family.proline'	'nearly identical (1002)AT2G39800| Symbols: ATP5CS, P5CS1 | P5CS1 (DELTA1-PYRROLINE-5-CARBOXYLATE SYNTHASE 1) | chr2:16605594-16610017 REVERSEnearly identical (1034)P5CS_ACTCH no original description'
Glyma18g03830.N3	j	PAC:26355568	TSS65844	No	NO Cluster	AT2G39800	'13.1.2.2'	'amino acid metabolism.synthesis.glutamate family.proline'	'nearly identical (1002)AT2G39800| Symbols: ATP5CS, P5CS1 | P5CS1 (DELTA1-PYRROLINE-5-CARBOXYLATE SYNTHASE 1) | chr2:16605594-16610017 REVERSEnearly identical (1034)P5CS_ACTCH no original description'
Glyma13g31990.N4	j	PAC:26318540	TSS48531	No	NO Cluster	AT1G61330	'29.5.11.4.3.2'	'protein.degradation.ubiquitin.E3.SCF.FBOX'	'weakly similar to ( 123)AT1G61330| Symbols: | F-box family protein | chr1:22626640-22628192 FORWARD no original description'
Glyma13g31990.2	=	PAC:26318540	TSS48531	Yes	44	AT1G61330	'29.5.11.4.3.2'	'protein.degradation.ubiquitin.E3.SCF.FBOX'	'weakly similar to ( 123)AT1G61330| Symbols: | F-box family protein | chr1:22626640-22628192 FORWARD no original description'
Glyma13g31990.N3	j	PAC:26318540	TSS48531	No	NO Cluster	AT1G61330	'29.5.11.4.3.2'	'protein.degradation.ubiquitin.E3.SCF.FBOX'	'weakly similar to ( 123)AT1G61330| Symbols: | F-box family protein | chr1:22626640-22628192 FORWARD no original description'
Glyma02g39360.N7	j	PAC:26290289	TSS6928	No	NO Cluster	AT3G11130	'31.4'	'cell.vesicle transport'	'nearly identical (3027)AT3G11130| Symbols: | clathrin heavy chain, putative | chr3:3482581-3491673 REVERSE no original description'
Glyma02g39360.1	=	PAC:26290289	TSS6928	Yes	20	AT3G11130	'31.4'	'cell.vesicle transport'	'nearly identical (3027)AT3G11130| Symbols: | clathrin heavy chain, putative | chr3:3482581-3491673 REVERSE no original description'
Glyma02g39360.N5	j	PAC:26290289	TSS6928	No	NO Cluster	AT3G11130	'31.4'	'cell.vesicle transport'	'nearly identical (3027)AT3G11130| Symbols: | clathrin heavy chain, putative | chr3:3482581-3491673 REVERSE no original description'
Glyma02g39360.N6	j	PAC:26290289	TSS6928	No	NO Cluster	AT3G11130	'31.4'	'cell.vesicle transport'	'nearly identical (3027)AT3G11130| Symbols: | clathrin heavy chain, putative | chr3:3482581-3491673 REVERSE no original description'
Glyma02g39360.N2	j	PAC:26290289	TSS6928	No	NO Cluster	AT3G11130	'31.4'	'cell.vesicle transport'	'nearly identical (3027)AT3G11130| Symbols: | clathrin heavy chain, putative | chr3:3482581-3491673 REVERSE no original description'
Glyma02g39360.N4	j	PAC:26290289	TSS6928	No	NO Cluster	AT3G11130	'31.4'	'cell.vesicle transport'	'nearly identical (3027)AT3G11130| Symbols: | clathrin heavy chain, putative | chr3:3482581-3491673 REVERSE no original description'
Glyma02g39360.N3	j	PAC:26290289	TSS6928	No	NO Cluster	AT3G11130	'31.4'	'cell.vesicle transport'	'nearly identical (3027)AT3G11130| Symbols: | clathrin heavy chain, putative | chr3:3482581-3491673 REVERSE no original description'
Glyma17g23890.N8	j	PAC:26312442	TSS65083	No	NO Cluster	AT3G55510	'35.2'	'not assigned.unknown'	'highly similar to ( 511)AT3G55510| Symbols: | similar to unknown protein [Arabidopsis thaliana] (TAIR:AT2G18220.1); similar to unnamed protein product [Vitis vinifera] (GB:CAO68987.1); contains InterPro domain Protein of unknown function UPF0120 (InterPro:IPR005343) | chr3:20590211-20593103 FORWARDmoderately similar to ( 289)NOC2L_ORYSA no original description'
Glyma17g23890.N7	j	PAC:26312442	TSS65083	No	NO Cluster	AT3G55510	'35.2'	'not assigned.unknown'	'highly similar to ( 511)AT3G55510| Symbols: | similar to unknown protein [Arabidopsis thaliana] (TAIR:AT2G18220.1); similar to unnamed protein product [Vitis vinifera] (GB:CAO68987.1); contains InterPro domain Protein of unknown function UPF0120 (InterPro:IPR005343) | chr3:20590211-20593103 FORWARDmoderately similar to ( 289)NOC2L_ORYSA no original description'
Glyma17g23890.N6	j	PAC:26312442	TSS65083	No	NO Cluster	AT3G55510	'35.2'	'not assigned.unknown'	'highly similar to ( 511)AT3G55510| Symbols: | similar to unknown protein [Arabidopsis thaliana] (TAIR:AT2G18220.1); similar to unnamed protein product [Vitis vinifera] (GB:CAO68987.1); contains InterPro domain Protein of unknown function UPF0120 (InterPro:IPR005343) | chr3:20590211-20593103 FORWARDmoderately similar to ( 289)NOC2L_ORYSA no original description'
Glyma17g23890.N5	j	PAC:26312442	TSS65083	No	NO Cluster	AT3G55510	'35.2'	'not assigned.unknown'	'highly similar to ( 511)AT3G55510| Symbols: | similar to unknown protein [Arabidopsis thaliana] (TAIR:AT2G18220.1); similar to unnamed protein product [Vitis vinifera] (GB:CAO68987.1); contains InterPro domain Protein of unknown function UPF0120 (InterPro:IPR005343) | chr3:20590211-20593103 FORWARDmoderately similar to ( 289)NOC2L_ORYSA no original description'
Glyma17g23890.N11	j	PAC:26312442	TSS65083	No	NO Cluster	AT3G55510	'35.2'	'not assigned.unknown'	'highly similar to ( 511)AT3G55510| Symbols: | similar to unknown protein [Arabidopsis thaliana] (TAIR:AT2G18220.1); similar to unnamed protein product [Vitis vinifera] (GB:CAO68987.1); contains InterPro domain Protein of unknown function UPF0120 (InterPro:IPR005343) | chr3:20590211-20593103 FORWARDmoderately similar to ( 289)NOC2L_ORYSA no original description'
Glyma17g23890.3	=	PAC:26312442	TSS65083	No	NO Cluster	AT3G55510	'35.2'	'not assigned.unknown'	'highly similar to ( 511)AT3G55510| Symbols: | similar to unknown protein [Arabidopsis thaliana] (TAIR:AT2G18220.1); similar to unnamed protein product [Vitis vinifera] (GB:CAO68987.1); contains InterPro domain Protein of unknown function UPF0120 (InterPro:IPR005343) | chr3:20590211-20593103 FORWARDmoderately similar to ( 289)NOC2L_ORYSA no original description'
Glyma17g23890.N9	j	PAC:26312442	TSS65083	No	NO Cluster	AT3G55510	'35.2'	'not assigned.unknown'	'highly similar to ( 511)AT3G55510| Symbols: | similar to unknown protein [Arabidopsis thaliana] (TAIR:AT2G18220.1); similar to unnamed protein product [Vitis vinifera] (GB:CAO68987.1); contains InterPro domain Protein of unknown function UPF0120 (InterPro:IPR005343) | chr3:20590211-20593103 FORWARDmoderately similar to ( 289)NOC2L_ORYSA no original description'
Glyma17g23890.N10	j	PAC:26312442	TSS65083	No	NO Cluster	AT3G55510	'35.2'	'not assigned.unknown'	'highly similar to ( 511)AT3G55510| Symbols: | similar to unknown protein [Arabidopsis thaliana] (TAIR:AT2G18220.1); similar to unnamed protein product [Vitis vinifera] (GB:CAO68987.1); contains InterPro domain Protein of unknown function UPF0120 (InterPro:IPR005343) | chr3:20590211-20593103 FORWARDmoderately similar to ( 289)NOC2L_ORYSA no original description'
Glyma17g23890.4	=	PAC:26312443	TSS65083	No	NO Cluster	AT3G55510	'35.2'	'not assigned.unknown'	'highly similar to ( 511)AT3G55510| Symbols: | similar to unknown protein [Arabidopsis thaliana] (TAIR:AT2G18220.1); similar to unnamed protein product [Vitis vinifera] (GB:CAO68987.1); contains InterPro domain Protein of unknown function UPF0120 (InterPro:IPR005343) | chr3:20590211-20593103 FORWARDmoderately similar to ( 289)NOC2L_ORYSA no original description'
Glyma17g23890.N12	j	PAC:26312442	TSS65083	Yes	59	AT3G55510	'35.2'	'not assigned.unknown'	'highly similar to ( 511)AT3G55510| Symbols: | similar to unknown protein [Arabidopsis thaliana] (TAIR:AT2G18220.1); similar to unnamed protein product [Vitis vinifera] (GB:CAO68987.1); contains InterPro domain Protein of unknown function UPF0120 (InterPro:IPR005343) | chr3:20590211-20593103 FORWARDmoderately similar to ( 289)NOC2L_ORYSA no original description'
Glyma13g42480.1	=	PAC:26317708	TSS51724	Yes	108	AT1G17640	'27.4'	'RNA.RNA binding'	'moderately similar to ( 224)AT1G17640| Symbols: | RNA recognition motif (RRM)-containing protein | chr1:6067387-6069091 REVERSE no original description'
Glyma13g42480.N2	j	PAC:26317708	TSS51724	No	NO Cluster	AT1G17640	'27.4'	'RNA.RNA binding'	'moderately similar to ( 224)AT1G17640| Symbols: | RNA recognition motif (RRM)-containing protein | chr1:6067387-6069091 REVERSE no original description'
Glyma14g36531.N2	x	PAC:26285114	TSS53317	No	NO Cluster	NO MapMan Annotation
Glyma14g36531.N4	j	PAC:26285114	TSS54782	No	NO Cluster	NO MapMan Annotation
Glyma14g36531.N3	j	PAC:26285114	TSS54782	No	NO Cluster	NO MapMan Annotation
Glyma14g36531.1	=	PAC:26285114	TSS54782	Yes	26	NO MapMan Annotation
Glyma01g40780.1	=	PAC:26323599	TSS2922	Yes	25	AT2G35350	'29.4'	'protein.postranslational modification'	'highly similar to ( 663)AT2G35350| Symbols: PLL1 | PLL1 (POLTERGEIST LIKE 1); protein serine/threonine phosphatase | chr2:14888439-14891195 REVERSE no original description'
Glyma01g40780.N2	j	PAC:26323599	TSS2922	No	NO Cluster	AT2G35350	'29.4'	'protein.postranslational modification'	'highly similar to ( 663)AT2G35350| Symbols: PLL1 | PLL1 (POLTERGEIST LIKE 1); protein serine/threonine phosphatase | chr2:14888439-14891195 REVERSE no original description'
Glyma20g31210.N7	j	PAC:26338106	TSS74518	No	NO Cluster	AT1G34190	'33.99'	'development.unspecified'	'moderately similar to ( 391)AT1G34190| Symbols: ANAC017 | ANAC017 (Arabidopsis NAC domain containing protein 17); transcription factor | chr1:12451707-12453892 FORWARDweakly similar to ( 189)NAC74_ORYSA no original description'
Glyma20g31210.N5	j	PAC:26338106	TSS74518	No	NO Cluster	AT1G34190	'33.99'	'development.unspecified'	'moderately similar to ( 391)AT1G34190| Symbols: ANAC017 | ANAC017 (Arabidopsis NAC domain containing protein 17); transcription factor | chr1:12451707-12453892 FORWARDweakly similar to ( 189)NAC74_ORYSA no original description'
Glyma20g31210.2	=	PAC:26338107	TSS74519	No	NO Cluster	AT1G34190	'33.99'	'development.unspecified'	'moderately similar to ( 391)AT1G34190| Symbols: ANAC017 | ANAC017 (Arabidopsis NAC domain containing protein 17); transcription factor | chr1:12451707-12453892 FORWARDweakly similar to ( 189)NAC74_ORYSA no original description'
Glyma20g31210.3	=	PAC:26338108	TSS74520	No	NO Cluster	AT1G34190	'33.99'	'development.unspecified'	'moderately similar to ( 391)AT1G34190| Symbols: ANAC017 | ANAC017 (Arabidopsis NAC domain containing protein 17); transcription factor | chr1:12451707-12453892 FORWARDweakly similar to ( 189)NAC74_ORYSA no original description'
Glyma20g31210.N6	j	PAC:26338106	TSS74518	No	NO Cluster	AT1G34190	'33.99'	'development.unspecified'	'moderately similar to ( 391)AT1G34190| Symbols: ANAC017 | ANAC017 (Arabidopsis NAC domain containing protein 17); transcription factor | chr1:12451707-12453892 FORWARDweakly similar to ( 189)NAC74_ORYSA no original description'
Glyma20g31210.1	=	PAC:26338105	TSS74518	Yes	70	AT1G34190	'33.99'	'development.unspecified'	'moderately similar to ( 391)AT1G34190| Symbols: ANAC017 | ANAC017 (Arabidopsis NAC domain containing protein 17); transcription factor | chr1:12451707-12453892 FORWARDweakly similar to ( 189)NAC74_ORYSA no original description'
Glyma20g31210.4	=	PAC:26338106	TSS74518	No	NO Cluster	AT1G34190	'33.99'	'development.unspecified'	'moderately similar to ( 391)AT1G34190| Symbols: ANAC017 | ANAC017 (Arabidopsis NAC domain containing protein 17); transcription factor | chr1:12451707-12453892 FORWARDweakly similar to ( 189)NAC74_ORYSA no original description'
Glyma06g01430.2	=	PAC:26301996	TSS20645	Yes	74	AT4G34530	'27.3.6'	'RNA.regulation of transcription.bHLH,Basic Helix-Loop-Helix family'	'weakly similar to ( 180)AT4G34530| Symbols: | basic helix-loop-helix (bHLH) family protein | chr4:16498471-16499951 FORWARD no original description'
Glyma06g01430.N5	j	PAC:26301996	TSS20645	No	NO Cluster	AT4G34530	'27.3.6'	'RNA.regulation of transcription.bHLH,Basic Helix-Loop-Helix family'	'weakly similar to ( 180)AT4G34530| Symbols: | basic helix-loop-helix (bHLH) family protein | chr4:16498471-16499951 FORWARD no original description'
Glyma06g01430.N4	j	PAC:26301996	TSS20645	No	NO Cluster	AT4G34530	'27.3.6'	'RNA.regulation of transcription.bHLH,Basic Helix-Loop-Helix family'	'weakly similar to ( 180)AT4G34530| Symbols: | basic helix-loop-helix (bHLH) family protein | chr4:16498471-16499951 FORWARD no original description'
Glyma06g01430.1	=	PAC:26301995	TSS20645	No	NO Cluster	AT4G34530	'27.3.6'	'RNA.regulation of transcription.bHLH,Basic Helix-Loop-Helix family'	'weakly similar to ( 180)AT4G34530| Symbols: | basic helix-loop-helix (bHLH) family protein | chr4:16498471-16499951 FORWARD no original description'
Glyma06g01430.N6	j	PAC:26301996	TSS20645	No	NO Cluster	AT4G34530	'27.3.6'	'RNA.regulation of transcription.bHLH,Basic Helix-Loop-Helix family'	'weakly similar to ( 180)AT4G34530| Symbols: | basic helix-loop-helix (bHLH) family protein | chr4:16498471-16499951 FORWARD no original description'
Glyma06g01430.N3	j	PAC:26301996	TSS20645	No	NO Cluster	AT4G34530	'27.3.6'	'RNA.regulation of transcription.bHLH,Basic Helix-Loop-Helix family'	'weakly similar to ( 180)AT4G34530| Symbols: | basic helix-loop-helix (bHLH) family protein | chr4:16498471-16499951 FORWARD no original description'
Glyma04g02740.N2	j	PAC:26304305	TSS11424	No	NO Cluster	AT1G75680	'26.3'	'misc.gluco-, galacto- and mannosidases'	'highly similar to ( 680)AT1G75680| Symbols: ATGH9B7 | ATGH9B7 (ARABIDOPSIS THALIANA GLYCOSYL HYDROLASE 9B7); hydrolase, hydrolyzing O-glycosyl compounds | chr1:28420876-28422892 REVERSEhighly similar to ( 645)GUN24_ORYSA no original description'
Glyma04g02740.1	=	PAC:26304305	TSS11424	Yes	36	AT1G75680	'26.3'	'misc.gluco-, galacto- and mannosidases'	'highly similar to ( 680)AT1G75680| Symbols: ATGH9B7 | ATGH9B7 (ARABIDOPSIS THALIANA GLYCOSYL HYDROLASE 9B7); hydrolase, hydrolyzing O-glycosyl compounds | chr1:28420876-28422892 REVERSEhighly similar to ( 645)GUN24_ORYSA no original description'
Glyma04g02740.N3	j	PAC:26304305	TSS11424	No	NO Cluster	AT1G75680	'26.3'	'misc.gluco-, galacto- and mannosidases'	'highly similar to ( 680)AT1G75680| Symbols: ATGH9B7 | ATGH9B7 (ARABIDOPSIS THALIANA GLYCOSYL HYDROLASE 9B7); hydrolase, hydrolyzing O-glycosyl compounds | chr1:28420876-28422892 REVERSEhighly similar to ( 645)GUN24_ORYSA no original description'
Glyma18g52110.N2	j	PAC:26356597	TSS67497	No	NO Cluster	AT5G13110	'7.1.1'	'OPP.oxidative PP.G6PD'	'highly similar to ( 926)AT5G13110| Symbols: G6PD2 | G6PD2 (GLUCOSE-6-PHOSPHATE DEHYDROGENASE 2); glucose-6-phosphate dehydrogenase | chr5:4158955-4161643 FORWARDhighly similar to ( 929)G6PDC_TOBAC no original description'
Glyma18g52110.N3	j	PAC:26356597	TSS67497	No	NO Cluster	AT5G13110	'7.1.1'	'OPP.oxidative PP.G6PD'	'highly similar to ( 926)AT5G13110| Symbols: G6PD2 | G6PD2 (GLUCOSE-6-PHOSPHATE DEHYDROGENASE 2); glucose-6-phosphate dehydrogenase | chr5:4158955-4161643 FORWARDhighly similar to ( 929)G6PDC_TOBAC no original description'
Glyma18g52110.N4	j	PAC:26356597	TSS67497	No	NO Cluster	AT5G13110	'7.1.1'	'OPP.oxidative PP.G6PD'	'highly similar to ( 926)AT5G13110| Symbols: G6PD2 | G6PD2 (GLUCOSE-6-PHOSPHATE DEHYDROGENASE 2); glucose-6-phosphate dehydrogenase | chr5:4158955-4161643 FORWARDhighly similar to ( 929)G6PDC_TOBAC no original description'
Glyma18g52110.1	=	PAC:26356597	TSS67497	Yes	20	AT5G13110	'7.1.1'	'OPP.oxidative PP.G6PD'	'highly similar to ( 926)AT5G13110| Symbols: G6PD2 | G6PD2 (GLUCOSE-6-PHOSPHATE DEHYDROGENASE 2); glucose-6-phosphate dehydrogenase | chr5:4158955-4161643 FORWARDhighly similar to ( 929)G6PDC_TOBAC no original description'
Glyma17g16210.N2	j	PAC:26312214	TSS64879	No	NO Cluster	AT4G17030	'10.7'	'cell wall.modification'	'weakly similar to ( 184)AT4G17030| Symbols: EXPR, AT-EXPR, ATEXPR1, ATHEXP BETA 3.1, ATEXLB1 | ATEXLB1 (ARABIDOPSIS THALIANA EXPANSIN-LIKE B1) | chr4:9581836-9583200 REVERSEmoderately similar to ( 318)EXLB1_ORYSA no original description'
Glyma17g16210.1	=	PAC:26312214	TSS64879	Yes	47	AT4G17030	'10.7'	'cell wall.modification'	'weakly similar to ( 184)AT4G17030| Symbols: EXPR, AT-EXPR, ATEXPR1, ATHEXP BETA 3.1, ATEXLB1 | ATEXLB1 (ARABIDOPSIS THALIANA EXPANSIN-LIKE B1) | chr4:9581836-9583200 REVERSEmoderately similar to ( 318)EXLB1_ORYSA no original description'
Glyma18g40451.N2	x	PAC:26355252	TSS66853	No	NO Cluster	NO MapMan Annotation
Glyma18g40451.N3	x	PAC:26355252	TSS66853	No	NO Cluster	NO MapMan Annotation
Glyma18g40451.N4	j	PAC:26355252	TSS68830	No	NO Cluster	NO MapMan Annotation
Glyma18g40451.1	=	PAC:26355252	TSS68831	Yes	45	NO MapMan Annotation
Glyma03g16630.N3	j	PAC:26334266	TSS9940	No	NO Cluster	No Arabidopsis Homolohue	'35.2'	'not assigned.unknown'	'no original description'
Glyma03g16630.1	=	PAC:26334266	TSS9940	No	NO Cluster	No Arabidopsis Homolohue	'35.2'	'not assigned.unknown'	'no original description'
Glyma03g16630.N2	j	PAC:26334266	TSS9940	Yes	103	No Arabidopsis Homolohue	'35.2'	'not assigned.unknown'	'no original description'
Glyma18g46400.N2	j	PAC:26357206	TSS69089	No	NO Cluster	AT4G00620	'25.5'	'C1-metabolism.Methylenetetrahydrofolate dehydrogenase & Methenyltetrahydrofolate cyclohydrolase'	'highly similar to ( 503)AT4G00620| Symbols: | tetrahydrofolate dehydrogenase/cyclohydrolase, putative | chr4:259265-260788 REVERSE no original description'
Glyma18g46400.N3	j	PAC:26357206	TSS69090	No	NO Cluster	AT4G00620	'25.5'	'C1-metabolism.Methylenetetrahydrofolate dehydrogenase & Methenyltetrahydrofolate cyclohydrolase'	'highly similar to ( 503)AT4G00620| Symbols: | tetrahydrofolate dehydrogenase/cyclohydrolase, putative | chr4:259265-260788 REVERSE no original description'
Glyma18g46400.N4	j	PAC:26357206	TSS69090	No	NO Cluster	AT4G00620	'25.5'	'C1-metabolism.Methylenetetrahydrofolate dehydrogenase & Methenyltetrahydrofolate cyclohydrolase'	'highly similar to ( 503)AT4G00620| Symbols: | tetrahydrofolate dehydrogenase/cyclohydrolase, putative | chr4:259265-260788 REVERSE no original description'
Glyma18g46400.N5	j	PAC:26357206	TSS69091	No	NO Cluster	AT4G00620	'25.5'	'C1-metabolism.Methylenetetrahydrofolate dehydrogenase & Methenyltetrahydrofolate cyclohydrolase'	'highly similar to ( 503)AT4G00620| Symbols: | tetrahydrofolate dehydrogenase/cyclohydrolase, putative | chr4:259265-260788 REVERSE no original description'
Glyma18g46400.N6	j	PAC:26357206	TSS69092	No	NO Cluster	AT4G00620	'25.5'	'C1-metabolism.Methylenetetrahydrofolate dehydrogenase & Methenyltetrahydrofolate cyclohydrolase'	'highly similar to ( 503)AT4G00620| Symbols: | tetrahydrofolate dehydrogenase/cyclohydrolase, putative | chr4:259265-260788 REVERSE no original description'
Glyma18g46400.1	=	PAC:26357206	TSS69092	Yes	15	AT4G00620	'25.5'	'C1-metabolism.Methylenetetrahydrofolate dehydrogenase & Methenyltetrahydrofolate cyclohydrolase'	'highly similar to ( 503)AT4G00620| Symbols: | tetrahydrofolate dehydrogenase/cyclohydrolase, putative | chr4:259265-260788 REVERSE no original description'
Glyma08g39400.N3	j	PAC:26306879	TSS31110	No	NO Cluster	AT5G06420	'29.5.11.4.2'	'protein.degradation.ubiquitin.E3.RING'	'moderately similar to ( 338)AT5G06420| Symbols: | zinc finger (CCCH-type/C3HC4-type RING finger) family protein | chr5:1961522-1962871 FORWARD no original description'
Glyma08g39400.N2	j	PAC:26306879	TSS31110	Yes	45	AT5G06420	'29.5.11.4.2'	'protein.degradation.ubiquitin.E3.RING'	'moderately similar to ( 338)AT5G06420| Symbols: | zinc finger (CCCH-type/C3HC4-type RING finger) family protein | chr5:1961522-1962871 FORWARD no original description'
Glyma08g39400.N5	j	PAC:26306879	TSS31111	No	NO Cluster	AT5G06420	'29.5.11.4.2'	'protein.degradation.ubiquitin.E3.RING'	'moderately similar to ( 338)AT5G06420| Symbols: | zinc finger (CCCH-type/C3HC4-type RING finger) family protein | chr5:1961522-1962871 FORWARD no original description'
Glyma08g39400.N4	j	PAC:26306879	TSS31111	No	NO Cluster	AT5G06420	'29.5.11.4.2'	'protein.degradation.ubiquitin.E3.RING'	'moderately similar to ( 338)AT5G06420| Symbols: | zinc finger (CCCH-type/C3HC4-type RING finger) family protein | chr5:1961522-1962871 FORWARD no original description'
Glyma08g39400.1	=	PAC:26306879	TSS31111	No	NO Cluster	AT5G06420	'29.5.11.4.2'	'protein.degradation.ubiquitin.E3.RING'	'moderately similar to ( 338)AT5G06420| Symbols: | zinc finger (CCCH-type/C3HC4-type RING finger) family protein | chr5:1961522-1962871 FORWARD no original description'
Glyma06g47330.1	=	PAC:26299411	TSS22625	No	NO Cluster	AT3G21060	'33.99'	'development.unspecified'	'highly similar to ( 693)AT3G21060| Symbols: | transducin family protein / WD-40 repeat family protein | chr3:7377828-7379948 FORWARD no original description'
Glyma06g47330.N7	j	PAC:26299409	TSS22625	No	NO Cluster	AT3G21060	'33.99'	'development.unspecified'	'highly similar to ( 693)AT3G21060| Symbols: | transducin family protein / WD-40 repeat family protein | chr3:7377828-7379948 FORWARD no original description'
Glyma06g47330.5	=	PAC:26299413	TSS22625	No	NO Cluster	AT3G21060	'33.99'	'development.unspecified'	'highly similar to ( 693)AT3G21060| Symbols: | transducin family protein / WD-40 repeat family protein | chr3:7377828-7379948 FORWARD no original description'
Glyma06g47330.3	=	PAC:26299410	TSS22625	No	NO Cluster	AT3G21060	'33.99'	'development.unspecified'	'highly similar to ( 693)AT3G21060| Symbols: | transducin family protein / WD-40 repeat family protein | chr3:7377828-7379948 FORWARD no original description'
Glyma06g47330.3	=	PAC:26299410	TSS22626	Yes	36	AT3G21060	'33.99'	'development.unspecified'	'highly similar to ( 693)AT3G21060| Symbols: | transducin family protein / WD-40 repeat family protein | chr3:7377828-7379948 FORWARD no original description'
Glyma06g47330.6	=	PAC:26299414	TSS22625	No	NO Cluster	AT3G21060	'33.99'	'development.unspecified'	'highly similar to ( 693)AT3G21060| Symbols: | transducin family protein / WD-40 repeat family protein | chr3:7377828-7379948 FORWARD no original description'
Glyma06g47330.4	=	PAC:26299412	TSS22625	No	NO Cluster	AT3G21060	'33.99'	'development.unspecified'	'highly similar to ( 693)AT3G21060| Symbols: | transducin family protein / WD-40 repeat family protein | chr3:7377828-7379948 FORWARD no original description'
Glyma06g47330.2	=	PAC:26299409	TSS22625	No	NO Cluster	AT3G21060	'33.99'	'development.unspecified'	'highly similar to ( 693)AT3G21060| Symbols: | transducin family protein / WD-40 repeat family protein | chr3:7377828-7379948 FORWARD no original description'
Glyma20g08930.1	=	PAC:26336538	TSS75372	Yes	16	AT2G26930	'16.1.1.4'	'secondary metabolism.isoprenoids.non-mevalonate pathway.CMK'	'moderately similar to ( 472)AT2G26930| Symbols: PDE277, ISPE, ATCDPMEK | ATCDPMEK (PIGMENT DEFECTIVE 277); 4-(cytidine 5'-diphospho)-2-C-methyl-D-erythritol kinase | chr2:11498907-11501307 REVERSE no original description'
Glyma20g08930.N3	j	PAC:26336538	TSS75372	No	NO Cluster	AT2G26930	'16.1.1.4'	'secondary metabolism.isoprenoids.non-mevalonate pathway.CMK'	'moderately similar to ( 472)AT2G26930| Symbols: PDE277, ISPE, ATCDPMEK | ATCDPMEK (PIGMENT DEFECTIVE 277); 4-(cytidine 5'-diphospho)-2-C-methyl-D-erythritol kinase | chr2:11498907-11501307 REVERSE no original description'
Glyma20g08930.N2	j	PAC:26336538	TSS75372	No	NO Cluster	AT2G26930	'16.1.1.4'	'secondary metabolism.isoprenoids.non-mevalonate pathway.CMK'	'moderately similar to ( 472)AT2G26930| Symbols: PDE277, ISPE, ATCDPMEK | ATCDPMEK (PIGMENT DEFECTIVE 277); 4-(cytidine 5'-diphospho)-2-C-methyl-D-erythritol kinase | chr2:11498907-11501307 REVERSE no original description'
Glyma18g47860.N3	j	PAC:26356908	TSS67254	No	NO Cluster	AT3G24090	'35.2'	'not assigned.unknown'	'nearly identical (1077)AT3G24090| Symbols: | transaminase | chr3:8697845-8700978 REVERSE no original description'
Glyma18g47860.N4	j	PAC:26356908	TSS67254	No	NO Cluster	AT3G24090	'35.2'	'not assigned.unknown'	'nearly identical (1077)AT3G24090| Symbols: | transaminase | chr3:8697845-8700978 REVERSE no original description'
Glyma18g47860.2	=	PAC:26356908	TSS67254	Yes	56	AT3G24090	'35.2'	'not assigned.unknown'	'nearly identical (1077)AT3G24090| Symbols: | transaminase | chr3:8697845-8700978 REVERSE no original description'
Glyma18g47860.N6	j	PAC:26356908	TSS67254	No	NO Cluster	AT3G24090	'35.2'	'not assigned.unknown'	'nearly identical (1077)AT3G24090| Symbols: | transaminase | chr3:8697845-8700978 REVERSE no original description'
Glyma18g47860.N5	j	PAC:26356908	TSS67254	No	NO Cluster	AT3G24090	'35.2'	'not assigned.unknown'	'nearly identical (1077)AT3G24090| Symbols: | transaminase | chr3:8697845-8700978 REVERSE no original description'
Glyma02g15180.N4	j	PAC:26290987	TSS4224	Yes	37	AT2G15730	'35.2'	'not assigned.unknown'	'highly similar to ( 503)AT2G15730| Symbols: | similar to unknown protein [Arabidopsis thaliana] (TAIR:AT4G34420.1); similar to unnamed protein product [Vitis vinifera] (GB:CAO47777.1); contains domain SSF52540 (SSF52540) | chr2:6856879-6858963 FORWARD no original description'
Glyma02g15180.N10	j	PAC:26290987	TSS4224	No	NO Cluster	AT2G15730	'35.2'	'not assigned.unknown'	'highly similar to ( 503)AT2G15730| Symbols: | similar to unknown protein [Arabidopsis thaliana] (TAIR:AT4G34420.1); similar to unnamed protein product [Vitis vinifera] (GB:CAO47777.1); contains domain SSF52540 (SSF52540) | chr2:6856879-6858963 FORWARD no original description'
Glyma02g15180.N7	j	PAC:26290987	TSS4224	No	NO Cluster	AT2G15730	'35.2'	'not assigned.unknown'	'highly similar to ( 503)AT2G15730| Symbols: | similar to unknown protein [Arabidopsis thaliana] (TAIR:AT4G34420.1); similar to unnamed protein product [Vitis vinifera] (GB:CAO47777.1); contains domain SSF52540 (SSF52540) | chr2:6856879-6858963 FORWARD no original description'
Glyma02g15180.N8	j	PAC:26290987	TSS4224	No	NO Cluster	AT2G15730	'35.2'	'not assigned.unknown'	'highly similar to ( 503)AT2G15730| Symbols: | similar to unknown protein [Arabidopsis thaliana] (TAIR:AT4G34420.1); similar to unnamed protein product [Vitis vinifera] (GB:CAO47777.1); contains domain SSF52540 (SSF52540) | chr2:6856879-6858963 FORWARD no original description'
Glyma02g15180.N5	j	PAC:26290987	TSS4224	No	NO Cluster	AT2G15730	'35.2'	'not assigned.unknown'	'highly similar to ( 503)AT2G15730| Symbols: | similar to unknown protein [Arabidopsis thaliana] (TAIR:AT4G34420.1); similar to unnamed protein product [Vitis vinifera] (GB:CAO47777.1); contains domain SSF52540 (SSF52540) | chr2:6856879-6858963 FORWARD no original description'
Glyma02g15180.N6	j	PAC:26290987	TSS4224	No	NO Cluster	AT2G15730	'35.2'	'not assigned.unknown'	'highly similar to ( 503)AT2G15730| Symbols: | similar to unknown protein [Arabidopsis thaliana] (TAIR:AT4G34420.1); similar to unnamed protein product [Vitis vinifera] (GB:CAO47777.1); contains domain SSF52540 (SSF52540) | chr2:6856879-6858963 FORWARD no original description'
Glyma02g15180.1	=	PAC:26290987	TSS4224	No	NO Cluster	AT2G15730	'35.2'	'not assigned.unknown'	'highly similar to ( 503)AT2G15730| Symbols: | similar to unknown protein [Arabidopsis thaliana] (TAIR:AT4G34420.1); similar to unnamed protein product [Vitis vinifera] (GB:CAO47777.1); contains domain SSF52540 (SSF52540) | chr2:6856879-6858963 FORWARD no original description'
Glyma02g15180.2	=	PAC:26290989	TSS4224	No	NO Cluster	AT2G15730	'35.2'	'not assigned.unknown'	'highly similar to ( 503)AT2G15730| Symbols: | similar to unknown protein [Arabidopsis thaliana] (TAIR:AT4G34420.1); similar to unnamed protein product [Vitis vinifera] (GB:CAO47777.1); contains domain SSF52540 (SSF52540) | chr2:6856879-6858963 FORWARD no original description'
Glyma02g15180.N9	j	PAC:26290987	TSS4224	No	NO Cluster	AT2G15730	'35.2'	'not assigned.unknown'	'highly similar to ( 503)AT2G15730| Symbols: | similar to unknown protein [Arabidopsis thaliana] (TAIR:AT4G34420.1); similar to unnamed protein product [Vitis vinifera] (GB:CAO47777.1); contains domain SSF52540 (SSF52540) | chr2:6856879-6858963 FORWARD no original description'
Glyma02g15180.3	=	PAC:26290988	TSS4225	No	NO Cluster	AT2G15730	'35.2'	'not assigned.unknown'	'highly similar to ( 503)AT2G15730| Symbols: | similar to unknown protein [Arabidopsis thaliana] (TAIR:AT4G34420.1); similar to unnamed protein product [Vitis vinifera] (GB:CAO47777.1); contains domain SSF52540 (SSF52540) | chr2:6856879-6858963 FORWARD no original description'
Glyma06g14650.1	=	PAC:26302530	TSS19322	Yes	15	AT5G05180	'35.2'	'not assigned.unknown'	'weakly similar to ( 101)AT5G05180| Symbols: | similar to unknown protein [Arabidopsis thaliana] (TAIR:AT3G10880.1); similar to unnamed protein product [Vitis vinifera] (GB:CAO41532.1) | chr5:1536925-1538319 FORWARD no original description'
[truncated: 53,294 more rows]
[truncated: 8 more columns]

## Sheet: 114 Clusters for 13253 isoforms
Cluster_Number	Isoform_ID	Nearest PAC_id	TSS_ID	Arabidopsis_Homologue	BINCODE	BIN_Name	Gene_ID	Description	Type
[truncated: 13,253 more rows]
[truncated: 8 more columns]

[truncated: 2 more sheets: 2942 DE isoforms, 9K isoforms and DNA sequences]
