# Supplementary material for: Changes in RNA Splicing in Developing Soybean (Glycine max) Embryos
Source: Biology (Basel). 2013 Nov 21;2(4):1311–37. doi: 10.3390/biology2041311 (PMC4009788; doi:10.3390/biology2041311)
Supplement: Supplementary File 7 — Supplementary Table S3 (XLSX, 693 KB) [file biology-02-01311-s007.xlsx]

## Sheet: GO enrichment on all 114cluster
Table S3. GO analysis on transcripts from all 114 clusters. Table 1. GO categories showing significantly (p-value cutoff 0.05) enriched processes in all 114 clusters. Table 2. GO categories and all relevant clusters, in which they occur are shown. Different representation of information provided in Table 1. Table 3. GO enrichment analysis (p-value cutoff 0.05) by using differentially expressed me…
Cluster_Number	GO_id	p-value	Name	Namespace	Definition
1	GO:0043447	2.08328e-05	alkane biosynthetic process	biological_process	The chemical reactions and pathways resulting in the formation of an alkane, any acyclic branched or unbranched hydrocarbon having the general formula CnH2n+2. [CHEBI:18310, GOC:jl, Wikipedia:Alkane]
1	GO:0010025	0.00019289	wax biosynthetic process	biological_process	The chemical reactions and pathways resulting in the formation of wax, which includes C16 and C18 fatty acids. [ISBN:0943088399]
1	GO:0010102	0.000816161	lateral root morphogenesis	biological_process	The process in which the anatomical structures of a lateral root are generated and organized. A lateral root is one formed from pericycle cells located on the xylem radius of the root, as opposed to the initiation of the main root from the embryo proper. [GOC:tair_curators]
1	GO:0006723	0.00271826	cuticle hydrocarbon biosynthetic process	biological_process	The chemical reactions and pathways resulting in the formation of hydrocarbons that make up the cuticle, the outer layer of some animals and plants, which acts to prevent water loss. [GOC:ai]
1	GO:0030397	0.00271826	membrane disassembly	biological_process	The controlled breakdown of any cell membrane in the context of a normal process such as autophagy. [GOC:mah]
1	GO:0033466	0.00271826	trans-zeatin biosynthetic process	biological_process	The chemical reactions and pathways resulting in the formation of trans-zeatin, (2E)-2-methyl-4-(9H-purin-6-ylamino)but-2-en-1-ol. [CHEBI:16522, GOC:mah]
1	GO:0042178	0.00271826	xenobiotic catabolic process	biological_process	The chemical reactions and pathways resulting in the breakdown of a xenobiotic compound, a compound foreign to living organisms. Used of chemical compounds, e.g. a xenobiotic chemical, such as a pesticide. [GOC:jl]
1	GO:0006559	0.00542957	L-phenylalanine catabolic process	biological_process	The chemical reactions and pathways resulting in the breakdown of phenylalanine, 2-amino-3-phenylpropanoic acid. [GOC:go_curators]
1	GO:0006572	0.00542957	tyrosine catabolic process	biological_process	The chemical reactions and pathways resulting in the breakdown of tyrosine, an aromatic amino acid, 2-amino-3-(4-hydroxyphenyl)propanoic acid. [GOC:go_curators]
1	GO:0016998	0.0108314	cell wall macromolecule catabolic process	biological_process	The chemical reactions and pathways resulting in the breakdown of macromolecules that form part of a cell wall. [GOC:go_curators]
1	GO:0007205	0.0135219	protein kinase C-activating G-protein coupled receptor signaling pathway	biological_process	The series of molecular signals generated as a consequence of a G-protein coupled receptor binding to its physiological ligand, where the pathway proceeds with activation of protein kinase C (PKC). PKC is activated by second messengers including diacylglycerol (DAG). [GOC:mah, GOC:signaling]
1	GO:0048235	0.0135219	pollen sperm cell differentiation	biological_process	The process in which a relatively unspecialized cell acquires specialized features of a haploid sperm cell within the plant gametophyte. [CL:0000366, GOC:jid, GOC:mtg_sensu]
1	GO:1990051	0.0135219	activation of protein kinase C activity	biological_process	Any process that initiates the activity of the inactive enzyme protein kinase C. [PMID:3156004]
1	GO:0048232	0.0215523	male gamete generation	biological_process	Generation of the male gamete; specialised haploid cells produced by meiosis and along with a female gamete takes part in sexual reproduction. [GOC:dph, GOC:jid]
1	GO:0009636	0.0295211	response to toxic substance	biological_process	Any process that results in a change in state or activity of a cell or an organism (in terms of movement, secretion, enzyme production, gene expression, etc.) as a result of a toxic stimulus. [GOC:lr]
1	GO:0007186	0.0321637	G-protein coupled receptor signaling pathway	biological_process	A series of molecular signals that proceeds with an activated receptor promoting the exchange of GDP for GTP on the alpha-subunit of an associated heterotrimeric G-protein complex. The GTP-bound activated alpha-G-protein then dissociates from the beta- and gamma-subunits to further transmit the signal within the cell. The pathway begins with receptor-ligand interaction, or for basal GPCR signalin…
1	GO:0032147	0.0321637	activation of protein kinase activity	biological_process	Any process that initiates the activity of an inactive protein kinase. [GOC:mah]
1	GO:0001934	0.0347996	positive regulation of protein phosphorylation	biological_process	Any process that activates or increases the frequency, rate or extent of addition of phosphate groups to amino acids within a protein. [GOC:hjd]
1	GO:0009816	0.0347996	defense response to bacterium, incompatible interaction	biological_process	A response of an organism to a bacterium that prevents the occurrence or spread of disease. [GOC:lr]
1	GO:0010305	0.0347996	leaf vascular tissue pattern formation	biological_process	Vascular tissue pattern formation as it occurs in the leaf of vascular plants. [GOC:tair_curators]
1	GO:0010311	0.0347996	lateral root formation	biological_process	The process that gives rise to a lateral root. This process pertains to the initial formation of a structure from unspecified parts. A lateral root primordium represents an organized group of cells derived from the root pericycle that will differentiate into a new root, as opposed to the initiation of the main root from the embryo proper. [GOC:tair_curators, PMID:17259263]
1	GO:0010562	0.0347996	positive regulation of phosphorus metabolic process	biological_process	Any process that increases the frequency, rate or extent of the chemical reactions and pathways involving phosphorus or compounds containing phosphorus. [GOC:dph, GOC:tb]
1	GO:0042327	0.0347996	positive regulation of phosphorylation	biological_process	Any process that activates or increases the frequency, rate or extent of addition of phosphate groups to a molecule. [GOC:jl]
1	GO:0045860	0.0347996	positive regulation of protein kinase activity	biological_process	Any process that activates or increases the frequency, rate or extent of protein kinase activity. [GOC:go_curators]
1	GO:0045937	0.0347996	positive regulation of phosphate metabolic process	biological_process	Any process that activates or increases the frequency, rate or extent of the chemical reactions and pathways involving phosphates. [GOC:go_curators]
1	GO:0044550	0.0351054	secondary metabolite biosynthetic process	biological_process	The chemical reactions and pathways resulting in the formation of secondary metabolites, the compounds that are not necessarily required for growth and maintenance of cells, and are often unique to a taxon. [GOC:jl]
1	GO:0033674	0.0374287	positive regulation of kinase activity	biological_process	Any process that activates or increases the frequency, rate or extent of kinase activity, the catalysis of the transfer of a phosphate group, usually from ATP, to a substrate molecule. [GOC:mah]
1	GO:0042335	0.0374287	cuticle development	biological_process	The chemical reactions and pathways resulting in the formation of a cuticle, the outer layer of some animals and plants, which acts to prevent water loss. [ISBN:0192800825]
1	GO:0055046	0.0400511	microgametogenesis	biological_process	The process whose specific outcome is the progression of the pollen grain over time, from its formation as the microspore to the mature structure. [GOC:mtg_plant]
1	GO:0009611	0.0411529	response to wounding	biological_process	Any process that results in a change in state or activity of a cell or an organism (in terms of movement, secretion, enzyme production, gene expression, etc.) as a result of a stimulus indicating damage to the organism. [GOC:go_curators]
1	GO:0031401	0.0426668	positive regulation of protein modification process	biological_process	Any process that activates or increases the frequency, rate or extent of the covalent alteration of one or more amino acid residues within a protein. [GOC:mah, GOC:tb]
1	GO:0009725	0.0445639	response to hormone stimulus	biological_process	Any process that results in a change in state or activity of a cell or an organism (in terms of movement, secretion, enzyme production, gene expression, etc.) as a result of a hormone stimulus. [GOC:jl]
1	GO:0000038	0.0452757	very long-chain fatty acid metabolic process	biological_process	The chemical reactions and pathways involving a fatty acid which has a chain length greater than C22. [CHEBI:27283, GOC:hjd]
1	GO:0051347	0.0452757	positive regulation of transferase activity	biological_process	Any process that activates or increases the frequency, rate or extent of transferase activity, the catalysis of the transfer of a group, e.g. a methyl group, glycosyl group, acyl group, phosphorus-containing, or other groups, from a donor compound to an acceptor. [GOC:ai]
1	GO:0010039	0.047878	response to iron ion	biological_process	Any process that results in a change in state or activity of a cell or an organism (in terms of movement, secretion, enzyme production, gene expression, etc.) as a result of an iron ion stimulus. [GOC:sm]
1	GO:0009733	0.0482308	response to auxin stimulus	biological_process	Any process that results in a change in state or activity of a cell or an organism (in terms of movement, secretion, enzyme production, gene expression, etc.) as a result of an auxin stimulus. [GOC:jl]
2	GO:0000911	2.40418e-07	cytokinesis by cell plate formation	biological_process	The process of dividing the cytoplasm of a parent cell where a structure forms in the cytoplasm and grows until reaching the plasma membrane, thereby completely separating the cytoplasms of adjacent progeny cells. An example of this is found in Arabidopsis thaliana. [GOC:clt]
2	GO:0048451	1.09202e-06	petal formation	biological_process	The process that gives rise to the petal. This process pertains to the initial formation of a structure from unspecified parts. [GOC:jid]
2	GO:0048453	1.09202e-06	sepal formation	biological_process	The process that gives rise to the sepal. This process pertains to the initial formation of a structure from unspecified parts. [GOC:jid]
2	GO:0000226	0.000127934	microtubule cytoskeleton organization	biological_process	A process that is carried out at the cellular level which results in the assembly, arrangement of constituent parts, or disassembly of cytoskeletal structures comprising microtubules and their associated proteins. [GOC:mah]
2	GO:0008283	0.000200684	cell proliferation	biological_process	The multiplication or reproduction of cells, resulting in the expansion of a cell population. [GOC:mah, GOC:mb]
2	GO:0006275	0.00181952	regulation of DNA replication	biological_process	Any process that modulates the frequency, rate or extent of DNA replication. [GOC:go_curators]
2	GO:0016572	0.00188883	histone phosphorylation	biological_process	The modification of histones by addition of phosphate groups. [GOC:ai]
2	GO:0006270	0.00253168	DNA replication initiation	biological_process	The process in which DNA-dependent DNA replication is started; this involves the separation of a stretch of the DNA double helix, the recruitment of DNA polymerases and the initiation of polymerase action. [ISBN:071673706X, ISBN:0815316194]
2	GO:0006306	0.00379605	DNA methylation	biological_process	The covalent transfer of a methyl group to either N-6 of adenine or C-5 or N-4 of cytosine. [GOC:ems, ISBN:0198506732]
2	GO:1901990	0.00379744	regulation of mitotic cell cycle phase transition	biological_process	Any process that modulates the frequency, rate or extent of mitotic cell cycle phase transition. [GOC:mtg_cell_cycle, GOC:TermGenie, PMID:22841721]
2	GO:0051567	0.00434607	histone H3-K9 methylation	biological_process	The modification of histone H3 by addition of a methyl group to lysine at position 9 of the histone. [GOC:ai]
2	GO:0031048	0.00572801	chromatin silencing by small RNA	biological_process	Repression of transcription by conversion of large regions of DNA into heterochromatin, directed by small RNAs sharing sequence identity to the repressed region. [GOC:dph, GOC:mtg_lung, GOC:ns]
2	GO:0007108	0.00623601	cytokinesis, initiation of separation	biological_process	The process involved in starting cell separation. [GOC:clt, GOC:dph, GOC:tb]
2	GO:0009835	0.00623601	fruit ripening	biological_process	An aging process that has as participant a fruit. Ripening causes changes in one or more characteristics of a fruit (color, aroma, flavor, texture, hardness, cell wall structure) and may make it more attractive to animals and aid in seed dispersal. [GOC:lr]
2	GO:0010422	0.00623601	regulation of brassinosteroid biosynthetic process	biological_process	Any process that modulates the frequency, rate or extent of the chemical reactions and pathways resulting in the formation of brassinosteroids. [PMID:16857903]
2	GO:0006346	0.00815639	methylation-dependent chromatin silencing	biological_process	Repression of transcription by methylation of DNA, leading to the formation of heterochromatin. [GOC:mah]
2	GO:0046165	0.00903829	alcohol biosynthetic process	biological_process	The chemical reactions and pathways resulting in the formation of alcohols, any of a class of compounds containing one or more hydroxyl groups attached to a saturated carbon atom. [CHEBI:30879, GOC:ai]
2	GO:0016126	0.0119333	sterol biosynthetic process	biological_process	The chemical reactions and pathways resulting in the formation of sterols, steroids with one or more hydroxyl groups and a hydrocarbon side-chain in the molecule. [GOC:go_curators]
2	GO:0016125	0.0123577	sterol metabolic process	biological_process	The chemical reactions and pathways involving sterols, steroids with one or more hydroxyl groups and a hydrocarbon side-chain in the molecule. [ISBN:0198547684]
2	GO:0010089	0.0147661	xylem development	biological_process	The formation of the principal water-conducting tissue of a vascular plant. [GOC:tb, ISBN:0471245208]
2	GO:0007091	0.0185946	metaphase/anaphase transition of mitotic cell cycle	biological_process	The cell cycle process in which a cell progresses from metaphase to anaphase during mitosis, triggered by the destruction of mitotic cyclins. [GOC:mtg_cell_cycle, PMID:10465783]
2	GO:0007094	0.0185946	mitotic spindle assembly checkpoint	biological_process	A cell cycle checkpoint that delays the metaphase/anaphase transition of a mitotic nuclear division until the spindle is correctly assembled and chromosomes are attached to the spindle. [GOC:mtg_cell_cycle, PMID:12360190]
2	GO:0030071	0.0185946	regulation of mitotic metaphase/anaphase transition	biological_process	Any process that modulates the frequency, rate or extent of the onset of anaphase (chromosome movement) in the mitotic cell cycle. [GOC:mah]
2	GO:0031577	0.0185946	spindle checkpoint	biological_process	A cell cycle checkpoint that delays progression through the metaphase/anaphase transition until the spindle is correctly assembled and oriented, and chromosomes are attached to the spindle. [GOC:mah, PMID:15897186]
2	GO:0044784	0.0185946	metaphase/anaphase transition of cell cycle	biological_process	The cell cycle process in which a cell progresses from metaphase to anaphase as part of the cell cycle. [GOC:mtg_cell_cycle]
2	GO:0045839	0.0185946	negative regulation of mitosis	biological_process	Any process that stops, prevents or reduces the rate or extent of mitosis. Mitosis is the division of the eukaryotic cell nucleus to produce two daughter nuclei that, usually, contain the identical chromosome complement to their mother. [GOC:dph, GOC:go_curators, GOC:tb]
2	GO:0045841	0.0185946	negative regulation of mitotic metaphase/anaphase transition	biological_process	Any process that stops, prevents, or reduces the frequency, rate or extent of the mitotic metaphase to anaphase transition. [GOC:go_curators]
2	GO:0051784	0.0185946	negative regulation of nuclear division	biological_process	Any process that stops, prevents, or reduces the frequency, rate or extent of nuclear division, the partitioning of the nucleus and its genetic information. [GOC:ai]
2	GO:0071173	0.0185946	spindle assembly checkpoint	biological_process	A cell cycle checkpoint that delays the metaphase/anaphase transition until the spindle is correctly assembled and chromosomes are attached to the spindle. [GOC:mah]
2	GO:0071174	0.0185946	mitotic spindle checkpoint	biological_process	A cell cycle checkpoint that delays the metaphase/anaphase transition of a mitotic nuclear division until the spindle is correctly assembled and oriented, or that delays completion of anaphase until chromosomes are attached to the spindle. [GOC:mtg_cell_cycle]
2	GO:1902099	0.0185946	regulation of metaphase/anaphase transition of cell cycle	biological_process	Any process that modulates the frequency, rate or extent of metaphase/anaphase transition of cell cycle. [GOC:mtg_cell_cycle, GOC:TermGenie]
2	GO:1902100	0.0185946	negative regulation of metaphase/anaphase transition of cell cycle	biological_process	Any process that stops, prevents or reduces the frequency, rate or extent of metaphase/anaphase transition of cell cycle. [GOC:mtg_cell_cycle, GOC:TermGenie]
2	GO:0010374	0.0203379	stomatal complex development	biological_process	The process whose specific outcome is the progression of the stomatal complex over time from its formation to the mature structure. The stomatal complex is the stomatal guard cells and their associated epidermal cells. [PMID:17259259]
2	GO:0044036	0.0214947	cell wall macromolecule metabolic process	biological_process	The chemical reactions and pathways involving macromolecules forming, or destined to form, part of the cell wall. A cell wall is a rigid or semi-rigid envelope lying outside the cell membrane of plant, fungal and most prokaryotic cells, maintaining their shape and protecting them from osmotic lysis. [GOC:jl, GOC:mah]
2	GO:0010087	0.0231294	phloem or xylem histogenesis	biological_process	The process whose specific outcome is the progression of phloem and/or xylem over time, from formation to the mature structure. An example of this process is found in Arabidopsis thaliana. [GOC:mtg_sensu, GOC:tb]
2	GO:0009909	0.0240245	regulation of flower development	biological_process	Any process that modulates the frequency, rate or extent of flower development. [GOC:go_curators]
2	GO:0000912	0.0247176	assembly of actomyosin apparatus involved in cytokinesis	biological_process	The assembly and arrangement of an apparatus composed of actin, myosin, and associated proteins that will function in cytokinesis. [GOC:mtg_cell_cycle]
2	GO:0000914	0.0247176	phragmoplast assembly	biological_process	The formation of a structure composed of actin, myosin, and associated proteins that will function in cytokinesis in cells that perform cytokinesis by cell plate formation. The structure usually contains antiparallel microtubules and membrane (often visible as vesicles). [GOC:clt]
2	GO:0007088	0.0247176	regulation of mitosis	biological_process	Any process that modulates the frequency, rate or extent of mitosis. [GOC:go_curators]
2	GO:0007093	0.0247176	mitotic cell cycle checkpoint	biological_process	A cell cycle checkpoint that ensures accurate chromosome replication and segregation by preventing progression through a mitotic cell cycle until conditions are suitable for the cell to proceed to the next stage. [GOC:mtg_cell_cycle]
2	GO:0010021	0.0247176	amylopectin biosynthetic process	biological_process	The chemical reactions and pathways resulting in the formation of amylopectin, the (1->4) linked alpha glucose units with alpha-(1->6) linkages. [ISBN:0943088399]
2	GO:0031032	0.0247176	actomyosin structure organization	biological_process	A process that is carried out at the cellular level which results in the assembly, arrangement of constituent parts, or disassembly of cytoskeletal structures containing both actin and myosin or paramyosin. The myosin may be organized into filaments. [GOC:dph, GOC:jl, GOC:mah]
2	GO:1901991	0.0247176	negative regulation of mitotic cell cycle phase transition	biological_process	Any process that stops, prevents or reduces the frequency, rate or extent of mitotic cell cycle phase transition. [GOC:mtg_cell_cycle, GOC:TermGenie, PMID:22841721]
2	GO:2000896	0.0247176	amylopectin metabolic process	biological_process	The chemical reactions and pathways involving an amylopectin. [GOC:mengo_curators]
2	GO:0016093	0.0308033	polyprenol metabolic process	biological_process	The chemical reactions and pathways involving polyprenols, prenols with more than 4 isoprenoid residues, which may be all-trans, or a mixture of cis and trans. [http://www.chem.qmul.ac.uk/iupac/misc/prenol.html#p2, ISBN:0198547684]
2	GO:0016094	0.0308033	polyprenol biosynthetic process	biological_process	The chemical reactions and pathways resulting in the formation of polyprenols, prenols with more than 4 isoprenoid residues, which may be all-trans, or a mixture of cis and trans. [GOC:go_curators, http://www.chem.qmul.ac.uk/iupac/misc/prenol.html#p2]
2	GO:0019348	0.0308033	dolichol metabolic process	biological_process	The chemical reactions and pathways involving dolichols, any 2,3-dihydropolyprenol derived from four or more linked isoprene units. [ISBN:0198506732]
2	GO:0019408	0.0308033	dolichol biosynthetic process	biological_process	The chemical reactions and pathways resulting in the formation of dolichols, any 2,3-dihydropolyprenol derived from four or more linked isoprene units. [ISBN:0198506732]
2	GO:0042547	0.0308033	cell wall modification involved in multidimensional cell growth	biological_process	The series of events resulting in chemical or structural changes to existing cell walls and contribute to multidimensional cell growth. [GOC:dph, GOC:jl, GOC:tb]
2	GO:0051783	0.0308033	regulation of nuclear division	biological_process	Any process that modulates the frequency, rate or extent of nuclear division, the partitioning of the nucleus and its genetic information. [GOC:ai]
2	GO:2000241	0.0343254	regulation of reproductive process	biological_process	Any process that modulates the frequency, rate or extent of reproductive process. [GOC:mah]
2	GO:0010389	0.0343419	regulation of G2/M transition of mitotic cell cycle	biological_process	Any process that modulates the rate or extent of progression from G2 phase to M phase of the mitotic cell cycle. [GOC:mtg_cell_cycle, PMID:17329565]
2	GO:0000086	0.0356961	G2/M transition of mitotic cell cycle	biological_process	The mitotic cell cycle transition by which a cell in G2 commits to M phase. The process begins when the kinase activity of M cyclin/CDK complex reaches a threshold high enough for the cell cycle to proceed. This is accomplished by activating a positive feedback loop that results in the accumulation of unphosphorylated and active M cyclin/CDK complex. [GOC:mtg_cell_cycle]
2	GO:0000280	0.0384659	nuclear division	biological_process	The division of a cell nucleus into two nuclei, with DNA and other nuclear contents distributed between the daughter nuclei. [GOC:mah]
2	GO:0000075	0.042864	cell cycle checkpoint	biological_process	A cell cycle process that controls cell cycle progression by monitoring the integrity of specific cell cycle events. A cell cycle checkpoint begins with detection of deficiencies or defects and ends with signal transduction. [GOC:mtg_cell_cycle]
2	GO:1901988	0.042864	negative regulation of cell cycle phase transition	biological_process	Any process that stops, prevents or reduces the frequency, rate or extent of cell cycle phase transition. [GOC:mtg_cell_cycle, GOC:TermGenie, PMID:22841721]
2	GO:0010639	0.0488394	negative regulation of organelle organization	biological_process	Any process that decreases the frequency, rate or extent of a process involved in the formation, arrangement of constituent parts, or disassembly of an organelle. [GOC:dph, GOC:tb]
2	GO:0051129	0.0488394	negative regulation of cellular component organization	biological_process	Any process that stops, prevents, or reduces the frequency, rate or extent of a process involved in the formation, arrangement of constituent parts, or disassembly of cell structures, including the plasma membrane and any external encapsulating structures such as the cell wall and cell envelope. [GOC:ai]
2	GO:0048580	0.0495205	regulation of post-embryonic development	biological_process	Any process that modulates the frequency, rate or extent of post-embryonic development. Post-embryonic development is defined as the process whose specific outcome is the progression of the organism over time, from the completion of embryonic development to the mature structure. [GOC:jid]
3	GO:0000911	3.57107e-22	cytokinesis by cell plate formation	biological_process	The process of dividing the cytoplasm of a parent cell where a structure forms in the cytoplasm and grows until reaching the plasma membrane, thereby completely separating the cytoplasms of adjacent progeny cells. An example of this is found in Arabidopsis thaliana. [GOC:clt]
3	GO:0051567	1.41709e-15	histone H3-K9 methylation	biological_process	The modification of histone H3 by addition of a methyl group to lysine at position 9 of the histone. [GOC:ai]
3	GO:0006275	7.33173e-14	regulation of DNA replication	biological_process	Any process that modulates the frequency, rate or extent of DNA replication. [GOC:go_curators]
3	GO:0008283	1.09514e-12	cell proliferation	biological_process	The multiplication or reproduction of cells, resulting in the expansion of a cell population. [GOC:mah, GOC:mb]
3	GO:0048451	9.45204e-12	petal formation	biological_process	The process that gives rise to the petal. This process pertains to the initial formation of a structure from unspecified parts. [GOC:jid]
3	GO:0048453	9.45204e-12	sepal formation	biological_process	The process that gives rise to the sepal. This process pertains to the initial formation of a structure from unspecified parts. [GOC:jid]
3	GO:0051225	9.45204e-12	spindle assembly	biological_process	The aggregation, arrangement and bonding together of a set of components to form the spindle, the array of microtubules and associated molecules that serves to move duplicated chromosomes apart. [GOC:ai, GOC:expert_rg, GOC:mtg_sensu, GOC:tb]
3	GO:0010389	3.50171e-10	regulation of G2/M transition of mitotic cell cycle	biological_process	Any process that modulates the rate or extent of progression from G2 phase to M phase of the mitotic cell cycle. [GOC:mtg_cell_cycle, PMID:17329565]
3	GO:0016572	4.03062e-09	histone phosphorylation	biological_process	The modification of histones by addition of phosphate groups. [GOC:ai]
3	GO:0000280	2.06143e-08	nuclear division	biological_process	The division of a cell nucleus into two nuclei, with DNA and other nuclear contents distributed between the daughter nuclei. [GOC:mah]
3	GO:0000226	4.65227e-08	microtubule cytoskeleton organization	biological_process	A process that is carried out at the cellular level which results in the assembly, arrangement of constituent parts, or disassembly of cytoskeletal structures comprising microtubules and their associated proteins. [GOC:mah]
3	GO:0006306	2.20793e-07	DNA methylation	biological_process	The covalent transfer of a methyl group to either N-6 of adenine or C-5 or N-4 of cytosine. [GOC:ems, ISBN:0198506732]
3	GO:0042023	6.75498e-07	DNA endoreduplication	biological_process	Regulated re-replication of DNA within a single cell cycle, resulting in an increased cell ploidy. An example of this process occurs in the synthesis of Drosophila salivary gland cell polytene chromosomes. [GOC:jl]
3	GO:0006346	5.9734e-05	methylation-dependent chromatin silencing	biological_process	Repression of transcription by methylation of DNA, leading to the formation of heterochromatin. [GOC:mah]
3	GO:0006342	7.81782e-05	chromatin silencing	biological_process	Repression of transcription by altering the structure of chromatin, e.g. by conversion of large regions of DNA into an inaccessible state often called heterochromatin. [GOC:mah, PMID:10219245]
3	GO:0007000	0.00010459	nucleolus organization	biological_process	A process that is carried out at the cellular level which results in the assembly, arrangement of constituent parts, or disassembly of the nucleolus. [GOC:dph, GOC:jid, GOC:jl, GOC:mah]
3	GO:0009909	0.000113244	regulation of flower development	biological_process	Any process that modulates the frequency, rate or extent of flower development. [GOC:go_curators]
3	GO:0006270	0.000208132	DNA replication initiation	biological_process	The process in which DNA-dependent DNA replication is started; this involves the separation of a stretch of the DNA double helix, the recruitment of DNA polymerases and the initiation of polymerase action. [ISBN:071673706X, ISBN:0815316194]
3	GO:0031048	0.000506872	chromatin silencing by small RNA	biological_process	Repression of transcription by conversion of large regions of DNA into heterochromatin, directed by small RNAs sharing sequence identity to the repressed region. [GOC:dph, GOC:mtg_lung, GOC:ns]
3	GO:0010089	0.000873204	xylem development	biological_process	The formation of the principal water-conducting tissue of a vascular plant. [GOC:tb, ISBN:0471245208]
3	GO:0051128	0.00110604	regulation of cellular component organization	biological_process	Any process that modulates the frequency, rate or extent of a process involved in the formation, arrangement of constituent parts, or disassembly of cell structures, including the plasma membrane and any external encapsulating structures such as the cell wall and cell envelope. [GOC:ai]
3	GO:0051726	0.00189183	regulation of cell cycle	biological_process	Any process that modulates the rate or extent of progression through the cell cycle. [GOC:ai, GOC:dph, GOC:tb]
3	GO:0042127	0.00304183	regulation of cell proliferation	biological_process	Any process that modulates the frequency, rate or extent of cell proliferation. [GOC:jl]
3	GO:0022603	0.00431278	regulation of anatomical structure morphogenesis	biological_process	Any process that modulates the frequency, rate or extent of anatomical structure morphogenesis. [GOC:mah]
3	GO:0052096	0.00639591	formation by symbiont of syncytium involving giant cell for nutrient acquisition from host	biological_process	The assembly by an organism of a syncytium, a nematode-induced multi-nucleate and physiologically active aggregation of fused root cells which exclusively provides the nematode with nourishment during its sedentary life, for the purpose of obtaining nutrients from its host organism. The host is defined as the larger of the organisms involved in a symbiotic interaction. [GOC:pamgo_curators]
3	GO:0030036	0.0102588	actin cytoskeleton organization	biological_process	A process that is carried out at the cellular level which results in the assembly, arrangement of constituent parts, or disassembly of cytoskeletal structures comprising actin filaments and their associated proteins. [GOC:dph, GOC:jl, GOC:mah]
3	GO:0007067	0.0117661	mitosis	biological_process	A cell cycle process comprising the steps by which the nucleus of a eukaryotic cell divides; the process involves condensation of chromosomal DNA into a highly compacted form. Canonically, mitosis produces two daughter nuclei whose chromosome complement is identical to that of the mother cell. [GOC:dph, GOC:ma, GOC:mah, ISBN:0198547684]
3	GO:0006086	0.0127519	acetyl-CoA biosynthetic process from pyruvate	biological_process	The chemical reactions and pathways resulting in the formation of acetyl-CoA from pyruvate. [GOC:dph, GOC:go_curators, GOC:tb]
3	GO:0009652	0.0127519	thigmotropism	biological_process	The movement of an organism, or part of an organism, such as leaves or tendrils, in response to a touch stimulus, usually toward or away from it. [GOC:jl, PMID:16153165]
3	GO:0010342	0.0127519	endosperm cellularization	biological_process	The separation of the multi-nucleate endosperm into individual cells. In many plant species, the endosperm that nurtures the embryo in the seed initially develops as a syncytium. This syncytial phase ends with simultaneous partitioning of the multi-nucleate cytoplasm into individual cells, a process referred to as cellularization. [PMID:12421698]
3	GO:0018105	0.0127519	peptidyl-serine phosphorylation	biological_process	The phosphorylation of peptidyl-serine to form peptidyl-O-phospho-L-serine. [RESID:AA0037]
3	GO:0018209	0.0127519	peptidyl-serine modification	biological_process	The modification of peptidyl-serine. [GOC:go_curators]
3	GO:0035404	0.0127519	histone-serine phosphorylation	biological_process	The modification of histones by addition of a phosphate group to a serine residue. [GOC:bf]
3	GO:0043987	0.0127519	histone H3-S10 phosphorylation	biological_process	The modification of histone H3 by the addition of an phosphate group to a serine residue at position 10 of the histone. [GOC:jl]
3	GO:0080175	0.0127519	phragmoplast microtubule organization	biological_process	A process that is carried out at the cellular level which results in the assembly, arrangement of constituent parts, or disassembly of structures formed of microtubules and associated proteins in phragmoplast, a plant cell specific structure that forms during late cytokinesis. Phragmoplast serves as a scaffold for cell plate assembly and subsequent formation of a new cell wall separating the two …
3	GO:0007091	0.0190683	metaphase/anaphase transition of mitotic cell cycle	biological_process	The cell cycle process in which a cell progresses from metaphase to anaphase during mitosis, triggered by the destruction of mitotic cyclins. [GOC:mtg_cell_cycle, PMID:10465783]
3	GO:0007094	0.0190683	mitotic spindle assembly checkpoint	biological_process	A cell cycle checkpoint that delays the metaphase/anaphase transition of a mitotic nuclear division until the spindle is correctly assembled and chromosomes are attached to the spindle. [GOC:mtg_cell_cycle, PMID:12360190]
3	GO:0015840	0.0190683	urea transport	biological_process	The directed movement of urea into, out of or within the cell. Urea is the water-soluble compound H2N-CO-NH2. [GOC:ai, ISBN:0198506732]
3	GO:0030071	0.0190683	regulation of mitotic metaphase/anaphase transition	biological_process	Any process that modulates the frequency, rate or extent of the onset of anaphase (chromosome movement) in the mitotic cell cycle. [GOC:mah]
3	GO:0031577	0.0190683	spindle checkpoint	biological_process	A cell cycle checkpoint that delays progression through the metaphase/anaphase transition until the spindle is correctly assembled and oriented, and chromosomes are attached to the spindle. [GOC:mah, PMID:15897186]
3	GO:0044784	0.0190683	metaphase/anaphase transition of cell cycle	biological_process	The cell cycle process in which a cell progresses from metaphase to anaphase as part of the cell cycle. [GOC:mtg_cell_cycle]
3	GO:0045839	0.0190683	negative regulation of mitosis	biological_process	Any process that stops, prevents or reduces the rate or extent of mitosis. Mitosis is the division of the eukaryotic cell nucleus to produce two daughter nuclei that, usually, contain the identical chromosome complement to their mother. [GOC:dph, GOC:go_curators, GOC:tb]
3	GO:0045841	0.0190683	negative regulation of mitotic metaphase/anaphase transition	biological_process	Any process that stops, prevents, or reduces the frequency, rate or extent of the mitotic metaphase to anaphase transition. [GOC:go_curators]
3	GO:0051784	0.0190683	negative regulation of nuclear division	biological_process	Any process that stops, prevents, or reduces the frequency, rate or extent of nuclear division, the partitioning of the nucleus and its genetic information. [GOC:ai]
3	GO:0071173	0.0190683	spindle assembly checkpoint	biological_process	A cell cycle checkpoint that delays the metaphase/anaphase transition until the spindle is correctly assembled and chromosomes are attached to the spindle. [GOC:mah]
3	GO:0071174	0.0190683	mitotic spindle checkpoint	biological_process	A cell cycle checkpoint that delays the metaphase/anaphase transition of a mitotic nuclear division until the spindle is correctly assembled and oriented, or that delays completion of anaphase until chromosomes are attached to the spindle. [GOC:mtg_cell_cycle]
3	GO:0071918	0.0190683	urea transmembrane transport	biological_process	The process in which urea, the water-soluble compound H2N-CO-NH2, is transported from one side of a membrane to the other by means of some agent such as a transporter or pore. [GOC:mah]
3	GO:1902099	0.0190683	regulation of metaphase/anaphase transition of cell cycle	biological_process	Any process that modulates the frequency, rate or extent of metaphase/anaphase transition of cell cycle. [GOC:mtg_cell_cycle, GOC:TermGenie]
3	GO:1902100	0.0190683	negative regulation of metaphase/anaphase transition of cell cycle	biological_process	Any process that stops, prevents or reduces the frequency, rate or extent of metaphase/anaphase transition of cell cycle. [GOC:mtg_cell_cycle, GOC:TermGenie]
3	GO:0033043	0.0194009	regulation of organelle organization	biological_process	Any process that modulates the frequency, rate or extent of a process involved in the formation, arrangement of constituent parts, or disassembly of an organelle. [GOC:mah]
3	GO:0030029	0.0199747	actin filament-based process	biological_process	Any cellular process that depends upon or alters the actin cytoskeleton, that part of the cytoskeleton comprising actin filaments and their associated proteins. [GOC:mah]
3	GO:0051510	0.0207766	regulation of unidimensional cell growth	biological_process	Any process that modulates the frequency, rate or extent of unidimensional cell growth, the process in which a cell irreversibly increases in size in one [spatial] dimension or along one axis. [GOC:ai]
3	GO:0022604	0.0219108	regulation of cell morphogenesis	biological_process	Any process that modulates the frequency, rate or extent of cell morphogenesis. Cell morphogenesis is the developmental process in which the shape of a cell is generated and organized. [GOC:isa_complete]
3	GO:0044036	0.0229845	cell wall macromolecule metabolic process	biological_process	The chemical reactions and pathways involving macromolecules forming, or destined to form, part of the cell wall. A cell wall is a rigid or semi-rigid envelope lying outside the cell membrane of plant, fungal and most prokaryotic cells, maintaining their shape and protecting them from osmotic lysis. [GOC:jl, GOC:mah]
3	GO:0000912	0.0253452	assembly of actomyosin apparatus involved in cytokinesis	biological_process	The assembly and arrangement of an apparatus composed of actin, myosin, and associated proteins that will function in cytokinesis. [GOC:mtg_cell_cycle]
3	GO:0000914	0.0253452	phragmoplast assembly	biological_process	The formation of a structure composed of actin, myosin, and associated proteins that will function in cytokinesis in cells that perform cytokinesis by cell plate formation. The structure usually contains antiparallel microtubules and membrane (often visible as vesicles). [GOC:clt]
3	GO:0007088	0.0253452	regulation of mitosis	biological_process	Any process that modulates the frequency, rate or extent of mitosis. [GOC:go_curators]
3	GO:0007093	0.0253452	mitotic cell cycle checkpoint	biological_process	A cell cycle checkpoint that ensures accurate chromosome replication and segregation by preventing progression through a mitotic cell cycle until conditions are suitable for the cell to proceed to the next stage. [GOC:mtg_cell_cycle]
3	GO:0031032	0.0253452	actomyosin structure organization	biological_process	A process that is carried out at the cellular level which results in the assembly, arrangement of constituent parts, or disassembly of cytoskeletal structures containing both actin and myosin or paramyosin. The myosin may be organized into filaments. [GOC:dph, GOC:jl, GOC:mah]
3	GO:0046785	0.0253452	microtubule polymerization	biological_process	The addition of tubulin heterodimers to one or both ends of a microtubule. [GOC:ai]
3	GO:1901991	0.0253452	negative regulation of mitotic cell cycle phase transition	biological_process	Any process that stops, prevents or reduces the frequency, rate or extent of mitotic cell cycle phase transition. [GOC:mtg_cell_cycle, GOC:TermGenie, PMID:22841721]
3	GO:0001558	0.0266968	regulation of cell growth	biological_process	Any process that modulates the frequency, rate, extent or direction of cell growth. [GOC:go_curators]
3	GO:0030838	0.0292345	positive regulation of actin filament polymerization	biological_process	Any process that activates or increases the frequency, rate or extent of actin polymerization. [GOC:mah]
3	GO:0045010	0.0292345	actin nucleation	biological_process	The initial step in the formation of an actin filament, in which actin monomers combine to form a new filament. Nucleation is slow relative to the subsequent addition of more monomers to extend the filament. [ISBN:0815316194]
3	GO:0010583	0.0305383	response to cyclopentenone	biological_process	Any process that results in a change in state or activity of a cell or an organism (in terms of movement, secretion, enzyme production, gene expression, etc.) as a result of a cyclopentenone stimulus. Cyclopentenones are oxylipins derived from polyunsaturated fatty acids. They are structurally similar to jasmonic acid, but contain a reactive unsaturated carbonyl structure in the cyclo-ring. Cyclo…
3	GO:0031109	0.031583	microtubule polymerization or depolymerization	biological_process	Assembly or disassembly of microtubules by the addition or removal of tubulin heterodimers from a microtubule. [GOC:mah]
3	GO:0051783	0.031583	regulation of nuclear division	biological_process	Any process that modulates the frequency, rate or extent of nuclear division, the partitioning of the nucleus and its genetic information. [GOC:ai]
3	GO:0031334	0.031865	positive regulation of protein complex assembly	biological_process	Any process that activates or increases the frequency, rate or extent of protein complex assembly. [GOC:mah]
3	GO:0032273	0.031865	positive regulation of protein polymerization	biological_process	Any process that activates or increases the frequency, rate or extent of the process of creating protein polymers. [GOC:mah]
3	GO:0008064	0.0332142	regulation of actin polymerization or depolymerization	biological_process	Any process that modulates the frequency, rate or extent of the assembly or disassembly of actin filaments by the addition or removal of actin monomers from a filament. [GOC:mah]
3	GO:0030041	0.0332142	actin filament polymerization	biological_process	Assembly of actin filaments by the addition of actin monomers to a filament. [GOC:mah]
3	GO:0030832	0.0332142	regulation of actin filament length	biological_process	Any process that controls the length of actin filaments in a cell. [GOC:dph, GOC:mah]
3	GO:0030833	0.0332142	regulation of actin filament polymerization	biological_process	Any process that modulates the frequency, rate or extent of the assembly of actin filaments by the addition of actin monomers to a filament. [GOC:mah]
3	GO:0032956	0.0332142	regulation of actin cytoskeleton organization	biological_process	Any process that modulates the frequency, rate or extent of the formation, arrangement of constituent parts, or disassembly of cytoskeletal structures comprising actin filaments and their associated proteins. [GOC:mah]
3	GO:0032970	0.0332142	regulation of actin filament-based process	biological_process	Any process that modulates the frequency, rate or extent of any cellular process that depends upon or alters the actin cytoskeleton. [GOC:mah]
3	GO:0051495	0.0332142	positive regulation of cytoskeleton organization	biological_process	Any process that activates or increases the frequency, rate or extent of the formation, arrangement of constituent parts, or disassembly of cytoskeletal structures. [GOC:ai]
3	GO:0008154	0.0359791	actin polymerization or depolymerization	biological_process	Assembly or disassembly of actin filaments by the addition or removal of actin monomers from a filament. [GOC:mah]
3	GO:0032271	0.0359791	regulation of protein polymerization	biological_process	Any process that modulates the frequency, rate or extent of the process of creating protein polymers. [GOC:mah]
3	GO:0043254	0.0359791	regulation of protein complex assembly	biological_process	Any process that modulates the frequency, rate or extent of protein complex assembly. [GOC:jl]
3	GO:0006084	0.037394	acetyl-CoA metabolic process	biological_process	The chemical reactions and pathways involving acetyl-CoA, a derivative of coenzyme A in which the sulfhydryl group is acetylated; it is a metabolite derived from several pathways (e.g. glycolysis, fatty acid oxidation, amino-acid catabolism) and is further metabolized by the tricarboxylic acid cycle. It is a key intermediate in lipid and terpenoid biosynthesis. [ISBN:0198547684]
3	GO:0051258	0.037394	protein polymerization	biological_process	The process of creating protein polymers, compounds composed of a large number of component monomers; polymeric proteins may be made up of different or identical monomers. Polymerization occurs by the addition of extra monomers to an existing poly- or oligomeric protein. [GOC:ai]
3	GO:0051493	0.037394	regulation of cytoskeleton organization	biological_process	Any process that modulates the frequency, rate or extent of the formation, arrangement of constituent parts, or disassembly of cytoskeletal structures. [GOC:ai]
3	GO:0006637	0.0388302	acyl-CoA metabolic process	biological_process	The chemical reactions and pathways involving acyl-CoA, any derivative of coenzyme A in which the sulfhydryl group is in thiolester linkage with an acyl group. [ISBN:0198506732]
3	GO:0035383	0.0388302	thioester metabolic process	biological_process	The chemical reactions and pathways involving a thioester, a compound of general formula RC(=O)SR' in which the linking oxygen in an ester is replaced by a sulfur atom. They are the product of esterification between a carboxylic acid and a thiol. [CHEBI:51277, GOC:bf, http://encyclopedia.thefreedictionary.com/Thioester]
3	GO:0044087	0.0388302	regulation of cellular component biogenesis	biological_process	Any process that modulates the frequency, rate or extent of cellular component biogenesis, a process that results in the biosynthesis of constituent macromolecules, assembly, and arrangement of constituent parts of a cellular component. [GOC:jl]
3	GO:0000278	0.0432779	mitotic cell cycle	biological_process	Progression through the phases of the mitotic cell cycle, the most common eukaryotic cell cycle, which canonically comprises four successive phases called G1, S, G2, and M and includes replication of the genome and the subsequent segregation of chromosomes into daughter cells. In some variant cell cycles nuclear replication or nuclear division may not be followed by cell division, or G1 and G2 ph…
3	GO:0000075	0.0439421	cell cycle checkpoint	biological_process	A cell cycle process that controls cell cycle progression by monitoring the integrity of specific cell cycle events. A cell cycle checkpoint begins with detection of deficiencies or defects and ends with signal transduction. [GOC:mtg_cell_cycle]
3	GO:0007349	0.0439421	cellularization	biological_process	The separation of a multi-nucleate cell or syncytium into individual cells. An example of this is found in Drosophila melanogaster embryo development. [GOC:go_curators, GOC:mtg_sensu, ISBN:0716731363]
3	GO:0009960	0.0439421	endosperm development	biological_process	The process whose specific outcome is the progression of the endosperm over time, from its formation to the mature structure. The endosperm is formed during fertilization and provides nutrients to the developing embryo. [GOC:sm]
3	GO:1901988	0.0439421	negative regulation of cell cycle phase transition	biological_process	Any process that stops, prevents or reduces the frequency, rate or extent of cell cycle phase transition. [GOC:mtg_cell_cycle, GOC:TermGenie, PMID:22841721]
3	GO:0048638	0.0450485	regulation of developmental growth	biological_process	Any process that modulates the frequency, rate or extent of developmental growth. [GOC:go_curators]
4	GO:0000911	7.69926e-22	cytokinesis by cell plate formation	biological_process	The process of dividing the cytoplasm of a parent cell where a structure forms in the cytoplasm and grows until reaching the plasma membrane, thereby completely separating the cytoplasms of adjacent progeny cells. An example of this is found in Arabidopsis thaliana. [GOC:clt]
4	GO:0016572	2.34419e-13	histone phosphorylation	biological_process	The modification of histones by addition of phosphate groups. [GOC:ai]
4	GO:0051567	9.11588e-13	histone H3-K9 methylation	biological_process	The modification of histone H3 by addition of a methyl group to lysine at position 9 of the histone. [GOC:ai]
4	GO:0006275	2.8856e-11	regulation of DNA replication	biological_process	Any process that modulates the frequency, rate or extent of DNA replication. [GOC:go_curators]
4	GO:0051225	2.06324e-09	spindle assembly	biological_process	The aggregation, arrangement and bonding together of a set of components to form the spindle, the array of microtubules and associated molecules that serves to move duplicated chromosomes apart. [GOC:ai, GOC:expert_rg, GOC:mtg_sensu, GOC:tb]
4	GO:0010389	5.76477e-08	regulation of G2/M transition of mitotic cell cycle	biological_process	Any process that modulates the rate or extent of progression from G2 phase to M phase of the mitotic cell cycle. [GOC:mtg_cell_cycle, PMID:17329565]
4	GO:0006306	8.10946e-08	DNA methylation	biological_process	The covalent transfer of a methyl group to either N-6 of adenine or C-5 or N-4 of cytosine. [GOC:ems, ISBN:0198506732]
4	GO:0031048	2.91288e-07	chromatin silencing by small RNA	biological_process	Repression of transcription by conversion of large regions of DNA into heterochromatin, directed by small RNAs sharing sequence identity to the repressed region. [GOC:dph, GOC:mtg_lung, GOC:ns]
4	GO:0006346	7.08224e-07	methylation-dependent chromatin silencing	biological_process	Repression of transcription by methylation of DNA, leading to the formation of heterochromatin. [GOC:mah]
4	GO:0009909	8.50859e-07	regulation of flower development	biological_process	Any process that modulates the frequency, rate or extent of flower development. [GOC:go_curators]
4	GO:0009957	1.05448e-06	epidermal cell fate specification	biological_process	The process in which a cell becomes capable of differentiating autonomously into an epidermal cell in an environment that is neutral with respect to the developmental pathway; upon specification, the cell fate can be reversed. [GOC:mtg_sensu, GOC:sm]
4	GO:0042127	1.24692e-06	regulation of cell proliferation	biological_process	Any process that modulates the frequency, rate or extent of cell proliferation. [GOC:jl]
4	GO:0000226	3.61584e-06	microtubule cytoskeleton organization	biological_process	A process that is carried out at the cellular level which results in the assembly, arrangement of constituent parts, or disassembly of cytoskeletal structures comprising microtubules and their associated proteins. [GOC:mah]
4	GO:0008283	7.75566e-06	cell proliferation	biological_process	The multiplication or reproduction of cells, resulting in the expansion of a cell population. [GOC:mah, GOC:mb]
4	GO:0048451	8.95917e-05	petal formation	biological_process	The process that gives rise to the petal. This process pertains to the initial formation of a structure from unspecified parts. [GOC:jid]
4	GO:0048453	8.95917e-05	sepal formation	biological_process	The process that gives rise to the sepal. This process pertains to the initial formation of a structure from unspecified parts. [GOC:jid]
4	GO:0010583	0.000327943	response to cyclopentenone	biological_process	Any process that results in a change in state or activity of a cell or an organism (in terms of movement, secretion, enzyme production, gene expression, etc.) as a result of a cyclopentenone stimulus. Cyclopentenones are oxylipins derived from polyunsaturated fatty acids. They are structurally similar to jasmonic acid, but contain a reactive unsaturated carbonyl structure in the cyclo-ring. Cyclo…
4	GO:0000280	0.000587851	nuclear division	biological_process	The division of a cell nucleus into two nuclei, with DNA and other nuclear contents distributed between the daughter nuclei. [GOC:mah]
4	GO:0042023	0.000634227	DNA endoreduplication	biological_process	Regulated re-replication of DNA within a single cell cycle, resulting in an increased cell ploidy. An example of this process occurs in the synthesis of Drosophila salivary gland cell polytene chromosomes. [GOC:jl]
4	GO:0007349	0.00123172	cellularization	biological_process	The separation of a multi-nucleate cell or syncytium into individual cells. An example of this is found in Drosophila melanogaster embryo development. [GOC:go_curators, GOC:mtg_sensu, ISBN:0716731363]
4	GO:0006342	0.00178348	chromatin silencing	biological_process	Repression of transcription by altering the structure of chromatin, e.g. by conversion of large regions of DNA into an inaccessible state often called heterochromatin. [GOC:mah, PMID:10219245]
4	GO:0051726	0.00466299	regulation of cell cycle	biological_process	Any process that modulates the rate or extent of progression through the cell cycle. [GOC:ai, GOC:dph, GOC:tb]
4	GO:0006270	0.00498418	DNA replication initiation	biological_process	The process in which DNA-dependent DNA replication is started; this involves the separation of a stretch of the DNA double helix, the recruitment of DNA polymerases and the initiation of polymerase action. [ISBN:071673706X, ISBN:0815316194]
4	GO:0022603	0.00763139	regulation of anatomical structure morphogenesis	biological_process	Any process that modulates the frequency, rate or extent of anatomical structure morphogenesis. [GOC:mah]
4	GO:0000712	0.00783499	resolution of meiotic recombination intermediates	biological_process	The cleavage and rejoining of intermediates, such as Holliday junctions, formed during meiotic recombination to produce two intact molecules in which genetic material has been exchanged. [GOC:elh, PMID:11733053]
4	GO:0007142	0.00783499	male meiosis II	biological_process	A cell cycle process comprising the steps by which a cell progresses through male meiosis II, the second meiotic division in the male germline. [GOC:dph, GOC:mah]
4	GO:0009971	0.00783499	anastral spindle assembly involved in male meiosis	biological_process	The aggregation, arrangement and bonding together of a set of components to form the anastral spindle in male meiotic cells. [GOC:tb, PMID:11973272]
4	GO:0044774	0.00783499	mitotic DNA integrity checkpoint	biological_process	A mitotic cell cycle process that controls cell cycle progression in response to changes in DNA structure by monitoring the integrity of the DNA. The DNA integrity checkpoint begins with detection of DNA damage, defects in DNA structure or DNA replication, and ends with signal transduction. [GOC:mtg_cell_cycle]
4	GO:0010440	0.00849386	stomatal lineage progression	biological_process	The process in which an unspecialized epidermal cell progresses through a series of divisions that culminate in the production of a stomatal complex. [GOC:expert_db, GOC:tb]
4	GO:0000278	0.0152678	mitotic cell cycle	biological_process	Progression through the phases of the mitotic cell cycle, the most common eukaryotic cell cycle, which canonically comprises four successive phases called G1, S, G2, and M and includes replication of the genome and the subsequent segregation of chromosomes into daughter cells. In some variant cell cycles nuclear replication or nuclear division may not be followed by cell division, or G1 and G2 ph…
4	GO:0000819	0.0156098	sister chromatid segregation	biological_process	The cell cycle process in which sister chromatids are organized and then physically separated and apportioned to two or more sets. [GOC:ai, GOC:elh]
4	GO:0009652	0.0156098	thigmotropism	biological_process	The movement of an organism, or part of an organism, such as leaves or tendrils, in response to a touch stimulus, usually toward or away from it. [GOC:jl, PMID:16153165]
4	GO:0010342	0.0156098	endosperm cellularization	biological_process	The separation of the multi-nucleate endosperm into individual cells. In many plant species, the endosperm that nurtures the embryo in the seed initially develops as a syncytium. This syncytial phase ends with simultaneous partitioning of the multi-nucleate cytoplasm into individual cells, a process referred to as cellularization. [PMID:12421698]
4	GO:0032456	0.0156098	endocytic recycling	biological_process	The directed movement of membrane-bounded vesicles from recycling endosomes back to the plasma membrane where they are recycled for further rounds of transport. [GOC:ecd, PMID:16473635]
4	GO:0007067	0.0173387	mitosis	biological_process	A cell cycle process comprising the steps by which the nucleus of a eukaryotic cell divides; the process involves condensation of chromosomal DNA into a highly compacted form. Canonically, mitosis produces two daughter nuclei whose chromosome complement is identical to that of the mother cell. [GOC:dph, GOC:ma, GOC:mah, ISBN:0198547684]
4	GO:0030036	0.0177948	actin cytoskeleton organization	biological_process	A process that is carried out at the cellular level which results in the assembly, arrangement of constituent parts, or disassembly of cytoskeletal structures comprising actin filaments and their associated proteins. [GOC:dph, GOC:jl, GOC:mah]
4	GO:0010564	0.0198562	regulation of cell cycle process	biological_process	Any process that modulates a cellular process that is involved in the progression of biochemical and morphological phases and events that occur in a cell during successive cell replication or nuclear replication events. [GOC:dph, GOC:tb]
4	GO:0007091	0.023325	metaphase/anaphase transition of mitotic cell cycle	biological_process	The cell cycle process in which a cell progresses from metaphase to anaphase during mitosis, triggered by the destruction of mitotic cyclins. [GOC:mtg_cell_cycle, PMID:10465783]
4	GO:0007093	0.023325	mitotic cell cycle checkpoint	biological_process	A cell cycle checkpoint that ensures accurate chromosome replication and segregation by preventing progression through a mitotic cell cycle until conditions are suitable for the cell to proceed to the next stage. [GOC:mtg_cell_cycle]
4	GO:0007094	0.023325	mitotic spindle assembly checkpoint	biological_process	A cell cycle checkpoint that delays the metaphase/anaphase transition of a mitotic nuclear division until the spindle is correctly assembled and chromosomes are attached to the spindle. [GOC:mtg_cell_cycle, PMID:12360190]
4	GO:0015840	0.023325	urea transport	biological_process	The directed movement of urea into, out of or within the cell. Urea is the water-soluble compound H2N-CO-NH2. [GOC:ai, ISBN:0198506732]
4	GO:0030071	0.023325	regulation of mitotic metaphase/anaphase transition	biological_process	Any process that modulates the frequency, rate or extent of the onset of anaphase (chromosome movement) in the mitotic cell cycle. [GOC:mah]
4	GO:0031577	0.023325	spindle checkpoint	biological_process	A cell cycle checkpoint that delays progression through the metaphase/anaphase transition until the spindle is correctly assembled and oriented, and chromosomes are attached to the spindle. [GOC:mah, PMID:15897186]
4	GO:0044784	0.023325	metaphase/anaphase transition of cell cycle	biological_process	The cell cycle process in which a cell progresses from metaphase to anaphase as part of the cell cycle. [GOC:mtg_cell_cycle]
4	GO:0045839	0.023325	negative regulation of mitosis	biological_process	Any process that stops, prevents or reduces the rate or extent of mitosis. Mitosis is the division of the eukaryotic cell nucleus to produce two daughter nuclei that, usually, contain the identical chromosome complement to their mother. [GOC:dph, GOC:go_curators, GOC:tb]
4	GO:0045841	0.023325	negative regulation of mitotic metaphase/anaphase transition	biological_process	Any process that stops, prevents, or reduces the frequency, rate or extent of the mitotic metaphase to anaphase transition. [GOC:go_curators]
4	GO:0051784	0.023325	negative regulation of nuclear division	biological_process	Any process that stops, prevents, or reduces the frequency, rate or extent of nuclear division, the partitioning of the nucleus and its genetic information. [GOC:ai]
4	GO:0071173	0.023325	spindle assembly checkpoint	biological_process	A cell cycle checkpoint that delays the metaphase/anaphase transition until the spindle is correctly assembled and chromosomes are attached to the spindle. [GOC:mah]
4	GO:0071174	0.023325	mitotic spindle checkpoint	biological_process	A cell cycle checkpoint that delays the metaphase/anaphase transition of a mitotic nuclear division until the spindle is correctly assembled and oriented, or that delays completion of anaphase until chromosomes are attached to the spindle. [GOC:mtg_cell_cycle]
4	GO:0071918	0.023325	urea transmembrane transport	biological_process	The process in which urea, the water-soluble compound H2N-CO-NH2, is transported from one side of a membrane to the other by means of some agent such as a transporter or pore. [GOC:mah]
4	GO:1901991	0.023325	negative regulation of mitotic cell cycle phase transition	biological_process	Any process that stops, prevents or reduces the frequency, rate or extent of mitotic cell cycle phase transition. [GOC:mtg_cell_cycle, GOC:TermGenie, PMID:22841721]
4	GO:1902099	0.023325	regulation of metaphase/anaphase transition of cell cycle	biological_process	Any process that modulates the frequency, rate or extent of metaphase/anaphase transition of cell cycle. [GOC:mtg_cell_cycle, GOC:TermGenie]
4	GO:1902100	0.023325	negative regulation of metaphase/anaphase transition of cell cycle	biological_process	Any process that stops, prevents or reduces the frequency, rate or extent of metaphase/anaphase transition of cell cycle. [GOC:mtg_cell_cycle, GOC:TermGenie]
4	GO:0051510	0.03036	regulation of unidimensional cell growth	biological_process	Any process that modulates the frequency, rate or extent of unidimensional cell growth, the process in which a cell irreversibly increases in size in one [spatial] dimension or along one axis. [GOC:ai]
4	GO:0000912	0.0309809	assembly of actomyosin apparatus involved in cytokinesis	biological_process	The assembly and arrangement of an apparatus composed of actin, myosin, and associated proteins that will function in cytokinesis. [GOC:mtg_cell_cycle]
4	GO:0000914	0.0309809	phragmoplast assembly	biological_process	The formation of a structure composed of actin, myosin, and associated proteins that will function in cytokinesis in cells that perform cytokinesis by cell plate formation. The structure usually contains antiparallel microtubules and membrane (often visible as vesicles). [GOC:clt]
4	GO:0007088	0.0309809	regulation of mitosis	biological_process	Any process that modulates the frequency, rate or extent of mitosis. [GOC:go_curators]
4	GO:0031032	0.0309809	actomyosin structure organization	biological_process	A process that is carried out at the cellular level which results in the assembly, arrangement of constituent parts, or disassembly of cytoskeletal structures containing both actin and myosin or paramyosin. The myosin may be organized into filaments. [GOC:dph, GOC:jl, GOC:mah]
4	GO:0022604	0.0319875	regulation of cell morphogenesis	biological_process	Any process that modulates the frequency, rate or extent of cell morphogenesis. Cell morphogenesis is the developmental process in which the shape of a cell is generated and organized. [GOC:isa_complete]
4	GO:0030029	0.0339384	actin filament-based process	biological_process	Any cellular process that depends upon or alters the actin cytoskeleton, that part of the cytoskeleton comprising actin filaments and their associated proteins. [GOC:mah]
4	GO:0006265	0.038578	DNA topological change	biological_process	The process in which a transformation is induced in the topological structure of a double-stranded DNA helix, resulting in a change in linking number. [ISBN:071673706X, ISBN:0935702490]
4	GO:0009558	0.038578	embryo sac cellularization	biological_process	The process in which the eight-nucleate single celled female gametophyte develops into the seven-celled female gametophyte. This mature structure contains two synergid cells and an egg cell at the micropylar end, and three antipodal cells at the other end. A binucleate endosperm mother cell is formed at the center. An example of this process is found in Arabidopsis thaliana. [GOC:jid, GOC:mtg_pla…
4	GO:0051783	0.038578	regulation of nuclear division	biological_process	Any process that modulates the frequency, rate or extent of nuclear division, the partitioning of the nucleus and its genetic information. [GOC:ai]
4	GO:0001558	0.0388302	regulation of cell growth	biological_process	Any process that modulates the frequency, rate, extent or direction of cell growth. [GOC:go_curators]
4	GO:0010498	0.043032	proteasomal protein catabolic process	biological_process	The chemical reactions and pathways resulting in the breakdown of a protein or peptide by hydrolysis of its peptide bonds that is mediated by the proteasome. [GOC:tb]
4	GO:0000075	0.0461167	cell cycle checkpoint	biological_process	A cell cycle process that controls cell cycle progression by monitoring the integrity of specific cell cycle events. A cell cycle checkpoint begins with detection of deficiencies or defects and ends with signal transduction. [GOC:mtg_cell_cycle]
4	GO:1901988	0.0461167	negative regulation of cell cycle phase transition	biological_process	Any process that stops, prevents or reduces the frequency, rate or extent of cell cycle phase transition. [GOC:mtg_cell_cycle, GOC:TermGenie, PMID:22841721]
5	GO:0000911	3.61893e-12	cytokinesis by cell plate formation	biological_process	The process of dividing the cytoplasm of a parent cell where a structure forms in the cytoplasm and grows until reaching the plasma membrane, thereby completely separating the cytoplasms of adjacent progeny cells. An example of this is found in Arabidopsis thaliana. [GOC:clt]
5	GO:0010389	4.74007e-12	regulation of G2/M transition of mitotic cell cycle	biological_process	Any process that modulates the rate or extent of progression from G2 phase to M phase of the mitotic cell cycle. [GOC:mtg_cell_cycle, PMID:17329565]
5	GO:0051567	1.5438e-09	histone H3-K9 methylation	biological_process	The modification of histone H3 by addition of a methyl group to lysine at position 9 of the histone. [GOC:ai]
5	GO:0006275	1.75534e-09	regulation of DNA replication	biological_process	Any process that modulates the frequency, rate or extent of DNA replication. [GOC:go_curators]
5	GO:0008283	1.89994e-09	cell proliferation	biological_process	The multiplication or reproduction of cells, resulting in the expansion of a cell population. [GOC:mah, GOC:mb]
5	GO:0048451	6.13297e-09	petal formation	biological_process	The process that gives rise to the petal. This process pertains to the initial formation of a structure from unspecified parts. [GOC:jid]
5	GO:0048453	6.13297e-09	sepal formation	biological_process	The process that gives rise to the sepal. This process pertains to the initial formation of a structure from unspecified parts. [GOC:jid]
5	GO:0016572	3.39867e-08	histone phosphorylation	biological_process	The modification of histones by addition of phosphate groups. [GOC:ai]
5	GO:0051225	2.17513e-07	spindle assembly	biological_process	The aggregation, arrangement and bonding together of a set of components to form the spindle, the array of microtubules and associated molecules that serves to move duplicated chromosomes apart. [GOC:ai, GOC:expert_rg, GOC:mtg_sensu, GOC:tb]
5	GO:0031048	6.58568e-07	chromatin silencing by small RNA	biological_process	Repression of transcription by conversion of large regions of DNA into heterochromatin, directed by small RNAs sharing sequence identity to the repressed region. [GOC:dph, GOC:mtg_lung, GOC:ns]
5	GO:0009909	2.61154e-06	regulation of flower development	biological_process	Any process that modulates the frequency, rate or extent of flower development. [GOC:go_curators]
5	GO:0006306	2.64372e-06	DNA methylation	biological_process	The covalent transfer of a methyl group to either N-6 of adenine or C-5 or N-4 of cytosine. [GOC:ems, ISBN:0198506732]
5	GO:0000280	2.84766e-06	nuclear division	biological_process	The division of a cell nucleus into two nuclei, with DNA and other nuclear contents distributed between the daughter nuclei. [GOC:mah]
5	GO:0006270	9.33533e-06	DNA replication initiation	biological_process	The process in which DNA-dependent DNA replication is started; this involves the separation of a stretch of the DNA double helix, the recruitment of DNA polymerases and the initiation of polymerase action. [ISBN:071673706X, ISBN:0815316194]
5	GO:0006346	2.31276e-05	methylation-dependent chromatin silencing	biological_process	Repression of transcription by methylation of DNA, leading to the formation of heterochromatin. [GOC:mah]
5	GO:0010342	7.59469e-05	endosperm cellularization	biological_process	The separation of the multi-nucleate endosperm into individual cells. In many plant species, the endosperm that nurtures the embryo in the seed initially develops as a syncytium. This syncytial phase ends with simultaneous partitioning of the multi-nucleate cytoplasm into individual cells, a process referred to as cellularization. [PMID:12421698]
5	GO:0051307	0.000226553	meiotic chromosome separation	biological_process	The process in which chromosomes are physically detached from each other during meiosis. [GOC:ai]
5	GO:0000914	0.000450547	phragmoplast assembly	biological_process	The formation of a structure composed of actin, myosin, and associated proteins that will function in cytokinesis in cells that perform cytokinesis by cell plate formation. The structure usually contains antiparallel microtubules and membrane (often visible as vesicles). [GOC:clt]
5	GO:0007088	0.000450547	regulation of mitosis	biological_process	Any process that modulates the frequency, rate or extent of mitosis. [GOC:go_curators]
5	GO:0042023	0.000845913	DNA endoreduplication	biological_process	Regulated re-replication of DNA within a single cell cycle, resulting in an increased cell ploidy. An example of this process occurs in the synthesis of Drosophila salivary gland cell polytene chromosomes. [GOC:jl]
5	GO:0009960	0.00155038	endosperm development	biological_process	The process whose specific outcome is the progression of the endosperm over time, from its formation to the mature structure. The endosperm is formed during fertilization and provides nutrients to the developing embryo. [GOC:sm]
5	GO:0051510	0.00345226	regulation of unidimensional cell growth	biological_process	Any process that modulates the frequency, rate or extent of unidimensional cell growth, the process in which a cell irreversibly increases in size in one [spatial] dimension or along one axis. [GOC:ai]
5	GO:0032875	0.00396984	regulation of DNA endoreduplication	biological_process	Any process that modulates the frequency, rate or extent of DNA endoreduplication. [GOC:mah]
5	GO:0000226	0.0043019	microtubule cytoskeleton organization	biological_process	A process that is carried out at the cellular level which results in the assembly, arrangement of constituent parts, or disassembly of cytoskeletal structures comprising microtubules and their associated proteins. [GOC:mah]
5	GO:0032147	0.00473703	activation of protein kinase activity	biological_process	Any process that initiates the activity of an inactive protein kinase. [GOC:mah]
5	GO:0010051	0.00505244	xylem and phloem pattern formation	biological_process	The regionalization process that gives rise to the patterning of the conducting tissues. An example of this process is found in Arabidopsis thaliana. [GOC:mtg_sensu, GOC:tb]
5	GO:0007000	0.00740996	nucleolus organization	biological_process	A process that is carried out at the cellular level which results in the assembly, arrangement of constituent parts, or disassembly of the nucleolus. [GOC:dph, GOC:jid, GOC:jl, GOC:mah]
5	GO:0048519	0.00771038	negative regulation of biological process	biological_process	Any process that stops, prevents, or reduces the frequency, rate or extent of a biological process. Biological processes are regulated by many means; examples include the control of gene expression, protein modification or interaction with a protein or substrate molecule. [GOC:jid]
5	GO:0007076	0.00879437	mitotic chromosome condensation	biological_process	The cell cycle process in which chromatin structure is compacted prior to and during mitosis in eukaryotic cells. [GOC:mah, ISBN:0815316194]
5	GO:0007113	0.00879437	endomitotic cell cycle	biological_process	A mitotic cell cycle in which chromosomes are replicated and sister chromatids separate, but spindle formation, nuclear membrane breakdown and nuclear division do not occur, resulting in an increased number of chromosomes in the cell. [GOC:curators, GOC:dos, GOC:expert_vm]
5	GO:0010425	0.00879437	DNA methylation on cytosine within a CNG sequence	biological_process	The covalent transfer of a methyl group, to C-5 or N-4, of a cytosine located within a CNG sequence in a DNA molecule. N stands for any nucleotide. [GOC:dph, GOC:tb, PMID:17239600]
5	GO:0045876	0.00879437	positive regulation of sister chromatid cohesion	biological_process	Any process that activates or increases the frequency, rate or extent of sister chromatid cohesion. [GOC:go_curators]
5	GO:0046938	0.00879437	phytochelatin biosynthetic process	biological_process	The chemical reactions and pathways resulting in the formation of phytochelatins, any of a group of peptides that bind metals (Cd, Zn, Cu, Pb, Hg) in thiolate coordination complexes. The structure is of the type (gamma-glutamyl-cysteinyl)n-glycine, where n is 2 to 11. [ISBN:0198506732]
5	GO:0006865	0.0112523	amino acid transport	biological_process	The directed movement of amino acids, organic acids containing one or more amino substituents, into, out of or within a cell, or between cells, by means of some agent such as a transporter or pore. [GOC:ai]
5	GO:0051302	0.014329	regulation of cell division	biological_process	Any process that modulates the frequency, rate or extent of the physical partitioning and separation of a cell into daughter cells. [GOC:go_curators]
5	GO:0071705	0.014334	nitrogen compound transport	biological_process	The directed movement of nitrogen-containing compounds into, out of or within a cell, or between cells, by means of some agent such as a transporter or pore. [CHEBI:51143, GOC:mah]
5	GO:0007067	0.0170707	mitosis	biological_process	A cell cycle process comprising the steps by which the nucleus of a eukaryotic cell divides; the process involves condensation of chromosomal DNA into a highly compacted form. Canonically, mitosis produces two daughter nuclei whose chromosome complement is identical to that of the mother cell. [GOC:dph, GOC:ma, GOC:mah, ISBN:0198547684]
5	GO:0010069	0.0175128	zygote asymmetric cytokinesis in embryo sac	biological_process	The division of the zygote in a plane perpendicular to the long axis of the embryo sac to produce a larger basal cell near the micropyle and a small terminal cell close to what was the central cell and is now the developing endosperm. An example of this process is found in Arabidopsis thaliana. [GOC:mtg_sensu, GOC:tb, ISBN:0865427429]
5	GO:0010070	0.0175128	zygote asymmetric cell division	biological_process	The division of the zygote into two daughter cells that will adopt developmentally distinct potentials. [GOC:tb]
5	GO:0010588	0.0175128	cotyledon vascular tissue pattern formation	biological_process	Vascular tissue pattern formation as it occurs in the cotyledon of vascular plants. [PMID:10559439]
5	GO:0015700	0.0175128	arsenite transport	biological_process	The directed movement of arsenite into, out of or within a cell, or between cells, by means of some agent such as a transporter or pore. [GOC:krc]
5	GO:0016145	0.0175128	S-glycoside catabolic process	biological_process	The chemical reactions and pathways resulting in the breakdown of S-glycosides, any compound in which a glycosyl group has been substituted into a thiol group. [ISBN:0198506732]
5	GO:0019759	0.0175128	glycosinolate catabolic process	biological_process	The chemical reactions and pathways resulting in the breakdown of glycosinolates, substituted thioglycosides found in rapeseed products and related cruciferae. [GOC:mah, http://www.gardeneaters.net/family_characteristics.html]
5	GO:0019762	0.0175128	glucosinolate catabolic process	biological_process	The chemical reactions and pathways resulting in the breakdown of glucosinolates, substituted thioglucosides found in rapeseed products and related cruciferae. [GOC:ai]
5	GO:0042344	0.0175128	indole glucosinolate catabolic process	biological_process	The chemical reactions and pathways resulting in the breakdown of indole glucosinolates, sulfur-containing compounds that have a common structure linked to an R group derived from tryptophan. [http://www.onelook.com]
5	GO:0080175	0.0175128	phragmoplast microtubule organization	biological_process	A process that is carried out at the cellular level which results in the assembly, arrangement of constituent parts, or disassembly of structures formed of microtubules and associated proteins in phragmoplast, a plant cell specific structure that forms during late cytokinesis. Phragmoplast serves as a scaffold for cell plate assembly and subsequent formation of a new cell wall separating the two …
5	GO:0009409	0.0183923	response to cold	biological_process	Any process that results in a change in state or activity of a cell or an organism (in terms of movement, secretion, enzyme production, gene expression, etc.) as a result of a cold stimulus, a temperature stimulus below the optimal temperature for that organism. [GOC:lr]
5	GO:0044767	0.019613	single-organism developmental process	biological_process	A biological process whose specific outcome is the progression of an integrated living unit: an anatomical structure (which may be a subcellular structure, cell, tissue, or organ), or organism over time from an initial condition to a later condition, involving only one organism. [GOC:jl]
5	GO:0015849	0.0196131	organic acid transport	biological_process	The directed movement of organic acids, any acidic compound containing carbon in covalent linkage, into, out of or within a cell, or between cells, by means of some agent such as a transporter or pore. [ISBN:0198506732]
5	GO:0046942	0.0196131	carboxylic acid transport	biological_process	The directed movement of carboxylic acids into, out of or within a cell, or between cells, by means of some agent such as a transporter or pore. Carboxylic acids are organic acids containing one or more carboxyl (COOH) groups or anions (COO-). [GOC:ai]
5	GO:0010090	0.0199367	trichome morphogenesis	biological_process	The process in which the structures of a hair cell (trichome) cell are generated and organized. This process occurs while the initially relatively unspecialized epidermal cell is acquiring the specialized features of a hair cell. An example of this process is found in Arabidopsis thaliana. [GOC:mtg_sensu, GOC:tair_curators]
5	GO:0010026	0.0241498	trichome differentiation	biological_process	The process in which a relatively unspecialized epidermal cell acquires the specialized features of a trichome cell. An example of this process is found in Arabidopsis thaliana. [GOC:mtg_sensu, PMID:9367433]
5	GO:0000186	0.0261559	activation of MAPKK activity	biological_process	The initiation of the activity of the inactive enzyme MAP kinase kinase (MAPKK). [PMID:9561267]
5	GO:0007091	0.0261559	metaphase/anaphase transition of mitotic cell cycle	biological_process	The cell cycle process in which a cell progresses from metaphase to anaphase during mitosis, triggered by the destruction of mitotic cyclins. [GOC:mtg_cell_cycle, PMID:10465783]
5	GO:0007094	0.0261559	mitotic spindle assembly checkpoint	biological_process	A cell cycle checkpoint that delays the metaphase/anaphase transition of a mitotic nuclear division until the spindle is correctly assembled and chromosomes are attached to the spindle. [GOC:mtg_cell_cycle, PMID:12360190]
5	GO:0015822	0.0261559	ornithine transport	biological_process	The directed movement of ornithine, 2,5-diaminopentanoic acid, into, out of or within a cell, or between cells, by means of some agent such as a transporter or pore. [GOC:ai]
5	GO:0015840	0.0261559	urea transport	biological_process	The directed movement of urea into, out of or within the cell. Urea is the water-soluble compound H2N-CO-NH2. [GOC:ai, ISBN:0198506732]
5	GO:0030071	0.0261559	regulation of mitotic metaphase/anaphase transition	biological_process	Any process that modulates the frequency, rate or extent of the onset of anaphase (chromosome movement) in the mitotic cell cycle. [GOC:mah]
5	GO:0031577	0.0261559	spindle checkpoint	biological_process	A cell cycle checkpoint that delays progression through the metaphase/anaphase transition until the spindle is correctly assembled and oriented, and chromosomes are attached to the spindle. [GOC:mah, PMID:15897186]
5	GO:0042343	0.0261559	indole glucosinolate metabolic process	biological_process	The chemical reactions and pathways resulting in the formation of indole glucosinolates. Glucosinolates are sulfur-containing compounds that have a common structure linked to an R group derived from tryptophan; indoles are biologically active substances based on 2,3-benzopyrrole, formed during the catabolism of tryptophan. [http://www.onelook.com/]
5	GO:0044784	0.0261559	metaphase/anaphase transition of cell cycle	biological_process	The cell cycle process in which a cell progresses from metaphase to anaphase as part of the cell cycle. [GOC:mtg_cell_cycle]
5	GO:0045839	0.0261559	negative regulation of mitosis	biological_process	Any process that stops, prevents or reduces the rate or extent of mitosis. Mitosis is the division of the eukaryotic cell nucleus to produce two daughter nuclei that, usually, contain the identical chromosome complement to their mother. [GOC:dph, GOC:go_curators, GOC:tb]
5	GO:0045841	0.0261559	negative regulation of mitotic metaphase/anaphase transition	biological_process	Any process that stops, prevents, or reduces the frequency, rate or extent of the mitotic metaphase to anaphase transition. [GOC:go_curators]
5	GO:0051784	0.0261559	negative regulation of nuclear division	biological_process	Any process that stops, prevents, or reduces the frequency, rate or extent of nuclear division, the partitioning of the nucleus and its genetic information. [GOC:ai]
5	GO:0071173	0.0261559	spindle assembly checkpoint	biological_process	A cell cycle checkpoint that delays the metaphase/anaphase transition until the spindle is correctly assembled and chromosomes are attached to the spindle. [GOC:mah]
5	GO:0071174	0.0261559	mitotic spindle checkpoint	biological_process	A cell cycle checkpoint that delays the metaphase/anaphase transition of a mitotic nuclear division until the spindle is correctly assembled and oriented, or that delays completion of anaphase until chromosomes are attached to the spindle. [GOC:mtg_cell_cycle]
5	GO:0071918	0.0261559	urea transmembrane transport	biological_process	The process in which urea, the water-soluble compound H2N-CO-NH2, is transported from one side of a membrane to the other by means of some agent such as a transporter or pore. [GOC:mah]
5	GO:0080170	0.0261559	hydrogen peroxide transmembrane transport	biological_process	The process in which hydrogen peroxide is transported from one side of a membrane to the other. This process includes the actual movement of the solute, and any regulation and preparatory steps, such as reduction of the solute. [GOC:tb]
5	GO:1902099	0.0261559	regulation of metaphase/anaphase transition of cell cycle	biological_process	Any process that modulates the frequency, rate or extent of metaphase/anaphase transition of cell cycle. [GOC:mtg_cell_cycle, GOC:TermGenie]
5	GO:1902100	0.0261559	negative regulation of metaphase/anaphase transition of cell cycle	biological_process	Any process that stops, prevents or reduces the frequency, rate or extent of metaphase/anaphase transition of cell cycle. [GOC:mtg_cell_cycle, GOC:TermGenie]
5	GO:2000123	0.0261559	positive regulation of stomatal complex development	biological_process	Any process that activates or increases the frequency, rate or extent of stomatal complex development. [GOC:obol]
5	GO:0003333	0.026491	amino acid transmembrane transport	biological_process	The directed movement of amino acids, organic acids containing one or more amino substituents across a membrane by means of some agent such as a transporter or pore. [GOC:dph, GOC:tb]
5	GO:0009886	0.0276166	post-embryonic morphogenesis	biological_process	The process, occurring after embryonic development, by which anatomical structures are generated and organized. [GOC:go_curators]
5	GO:0000165	0.0307974	MAPK cascade	biological_process	An intracellular protein kinase cascade containing at least a MAPK, a MAPKK and a MAP3K. The cascade can also contain two additional tiers: the upstream MAP4K and the downstream MAP Kinase-activated kinase (MAPKAPK). The kinases in each tier phosphorylate and activate the kinases in the downstream tier to transmit a signal within a cell. [GOC:bf, GOC:mtg_signaling_feb11, PMID:20811974, PMID:95612…
5	GO:0007243	0.0307974	intracellular protein kinase cascade	biological_process	A series of reactions in which a signal is passed on to downstream proteins within the cell by sequential protein phosphorylation and activation of the cascade components. [GOC:bf, GOC:jl, GOC:signaling]
5	GO:0015711	0.0310496	organic anion transport	biological_process	The directed movement of organic anions into, out of or within a cell, or between cells, by means of some agent such as a transporter or pore. Organic anions are atoms or small molecules with a negative charge which contain carbon in covalent linkage. [GOC:ai, GOC:krc]
5	GO:0048439	0.031827	flower morphogenesis	biological_process	The process in which the anatomical structures of the flower are generated and organized. [GOC:go_curators]
5	GO:0007093	0.0347244	mitotic cell cycle checkpoint	biological_process	A cell cycle checkpoint that ensures accurate chromosome replication and segregation by preventing progression through a mitotic cell cycle until conditions are suitable for the cell to proceed to the next stage. [GOC:mtg_cell_cycle]
5	GO:0009831	0.0347244	plant-type cell wall modification involved in multidimensional cell growth	biological_process	The series of events that occur during cell growth that result in chemical or structural changes to existing cell walls of the type composed chiefly of cellulose and pectin. An example of this is found in Arabidopsis thaliana. [GOC:lr, GOC:mtg_sensu]
5	GO:0019755	0.0347244	one-carbon compound transport	biological_process	The directed movement of one-carbon compounds into, out of or within a cell, or between cells, by means of some agent such as a transporter or pore. [GOC:ai]
5	GO:0040020	0.0347244	regulation of meiosis	biological_process	Any process that modulates the frequency, rate or extent of meiosis, the process in which the nucleus of a diploid cell divides twice forming four haploid cells, one or more of which usually function as gametes. [GOC:ems, GOC:ma]
5	GO:1901991	0.0347244	negative regulation of mitotic cell cycle phase transition	biological_process	Any process that stops, prevents or reduces the frequency, rate or extent of mitotic cell cycle phase transition. [GOC:mtg_cell_cycle, GOC:TermGenie, PMID:22841721]
5	GO:0009595	0.0355997	detection of biotic stimulus	biological_process	The series of events in which a biotic stimulus, one caused or produced by a living organism, is received and converted into a molecular signal. [GOC:hb]
5	GO:0009624	0.0355997	response to nematode	biological_process	Any process that results in a change in state or activity of a cell or an organism (in terms of movement, secretion, enzyme production, gene expression, etc.) as a result of a stimulus from a nematode. [GOC:hb]
5	GO:0042886	0.0355997	amide transport	biological_process	The directed movement of an amide, any compound containing one, two, or three acyl groups attached to a nitrogen atom, into, out of or within a cell, or between cells, by means of some agent such as a transporter or pore. [GOC:jl, ISBN:0198506732]
5	GO:0009793	0.0430973	embryo development ending in seed dormancy	biological_process	The process whose specific outcome is the progression of the embryo over time, from zygote formation to the end of seed dormancy. An example of this process is found in Arabidopsis thaliana. [GOC:go_curators, GOC:mtg_sensu]
5	GO:0005986	0.0432188	sucrose biosynthetic process	biological_process	The chemical reactions and pathways resulting in the formation of sucrose, the disaccharide fructofuranosyl-glucopyranoside. [GOC:go_curators]
5	GO:0007205	0.0432188	protein kinase C-activating G-protein coupled receptor signaling pathway	biological_process	The series of molecular signals generated as a consequence of a G-protein coupled receptor binding to its physiological ligand, where the pathway proceeds with activation of protein kinase C (PKC). PKC is activated by second messengers including diacylglycerol (DAG). [GOC:mah, GOC:signaling]
5	GO:0010092	0.0432188	specification of organ identity	biological_process	The regionalization process in which the identity of an organ primordium is specified. Identity is considered to be the aggregate of characteristics by which a structure is recognized. [GOC:tair_curators]
5	GO:0010093	0.0432188	specification of floral organ identity	biological_process	The process in which the identity of a floral organ primordium is specified. Identity is considered to be the aggregate of characteristics by which a structure is recognized. [GOC:tb]
5	GO:0010337	0.0432188	regulation of salicylic acid metabolic process	biological_process	Any process that modulates the frequency, rate or extent of the chemical reactions and pathways involving salicylic acid. [PMID:14765119]
5	GO:0019253	0.0432188	reductive pentose-phosphate cycle	biological_process	The fixation of carbon dioxide (CO2) as glucose in the chloroplasts of C3 plants; uses ATP and NADPH formed in the light reactions of photosynthesis; carbon dioxide reacts with ribulose 1,5-bisphosphate (catalyzed by the function of ribulose-bisphosphate carboxylase) to yield two molecules of 3-phosphoglycerate; these are then phosphorylated by ATP to 1,3-bisphosphateglyceraldehyde which, in turn…
5	GO:0019685	0.0432188	photosynthesis, dark reaction	biological_process	A complex cycle of enzyme-mediated reactions which catalyzes the reduction of carbon dioxide to sugar. As well as carbon dioxide the cycle requires reducing power in the form of reduced nicotinamide adenine dinucleotide phosphate (NADP) and chemical energy in the form of adenosine triphosphate (ATP). The reduced NADP (NADPH) and ATP are produced by the 'light' reactions. [ISBN:0582015952]
5	GO:0042547	0.0432188	cell wall modification involved in multidimensional cell growth	biological_process	The series of events resulting in chemical or structural changes to existing cell walls and contribute to multidimensional cell growth. [GOC:dph, GOC:jl, GOC:tb]
5	GO:0044273	0.0432188	sulfur compound catabolic process	biological_process	The chemical reactions and pathways resulting in the breakdown of compounds that contain sulfur, such as the amino acids methionine and cysteine or the tripeptide glutathione. [GOC:jl]
5	GO:1990051	0.0432188	activation of protein kinase C activity	biological_process	Any process that initiates the activity of the inactive enzyme protein kinase C. [PMID:3156004]
5	GO:0035556	0.0466612	intracellular signal transduction	biological_process	The process in which a signal is passed on to downstream components within the cell, which become activated themselves to further propagate the signal and finally trigger a change in the function or state of the cell. [GOC:signaling, ISBN:3527303782]
5	GO:0010374	0.049226	stomatal complex development	biological_process	The process whose specific outcome is the progression of the stomatal complex over time from its formation to the mature structure. The stomatal complex is the stomatal guard cells and their associated epidermal cells. [PMID:17259259]
6	GO:0010389	2.25171e-10	regulation of G2/M transition of mitotic cell cycle	biological_process	Any process that modulates the rate or extent of progression from G2 phase to M phase of the mitotic cell cycle. [GOC:mtg_cell_cycle, PMID:17329565]
6	GO:0051567	4.88747e-10	histone H3-K9 methylation	biological_process	The modification of histone H3 by addition of a methyl group to lysine at position 9 of the histone. [GOC:ai]
6	GO:0006275	1.21593e-09	regulation of DNA replication	biological_process	Any process that modulates the frequency, rate or extent of DNA replication. [GOC:go_curators]
6	GO:0006306	7.48804e-09	DNA methylation	biological_process	The covalent transfer of a methyl group to either N-6 of adenine or C-5 or N-4 of cytosine. [GOC:ems, ISBN:0198506732]
6	GO:0000911	1.04814e-08	cytokinesis by cell plate formation	biological_process	The process of dividing the cytoplasm of a parent cell where a structure forms in the cytoplasm and grows until reaching the plasma membrane, thereby completely separating the cytoplasms of adjacent progeny cells. An example of this is found in Arabidopsis thaliana. [GOC:clt]
6	GO:0008283	8.48977e-08	cell proliferation	biological_process	The multiplication or reproduction of cells, resulting in the expansion of a cell population. [GOC:mah, GOC:mb]
6	GO:0000280	1.0955e-05	nuclear division	biological_process	The division of a cell nucleus into two nuclei, with DNA and other nuclear contents distributed between the daughter nuclei. [GOC:mah]
6	GO:0006346	4.30588e-05	methylation-dependent chromatin silencing	biological_process	Repression of transcription by methylation of DNA, leading to the formation of heterochromatin. [GOC:mah]
6	GO:0016572	9.05548e-05	histone phosphorylation	biological_process	The modification of histones by addition of phosphate groups. [GOC:ai]
6	GO:0042023	0.000236042	DNA endoreduplication	biological_process	Regulated re-replication of DNA within a single cell cycle, resulting in an increased cell ploidy. An example of this process occurs in the synthesis of Drosophila salivary gland cell polytene chromosomes. [GOC:jl]
6	GO:0031048	0.000415187	chromatin silencing by small RNA	biological_process	Repression of transcription by conversion of large regions of DNA into heterochromatin, directed by small RNAs sharing sequence identity to the repressed region. [GOC:dph, GOC:mtg_lung, GOC:ns]
6	GO:0009909	0.000632161	regulation of flower development	biological_process	Any process that modulates the frequency, rate or extent of flower development. [GOC:go_curators]
6	GO:0051225	0.00075042	spindle assembly	biological_process	The aggregation, arrangement and bonding together of a set of components to form the spindle, the array of microtubules and associated molecules that serves to move duplicated chromosomes apart. [GOC:ai, GOC:expert_rg, GOC:mtg_sensu, GOC:tb]
6	GO:0048451	0.000827348	petal formation	biological_process	The process that gives rise to the petal. This process pertains to the initial formation of a structure from unspecified parts. [GOC:jid]
6	GO:0048453	0.000827348	sepal formation	biological_process	The process that gives rise to the sepal. This process pertains to the initial formation of a structure from unspecified parts. [GOC:jid]
6	GO:0031047	0.00135935	gene silencing by RNA	biological_process	Any process in which RNA molecules inactivate expression of target genes. [GOC:dph, GOC:mah, GOC:tb, PMID:15020054]
6	GO:0042127	0.00262404	regulation of cell proliferation	biological_process	Any process that modulates the frequency, rate or extent of cell proliferation. [GOC:jl]
6	GO:0016444	0.00312447	somatic cell DNA recombination	biological_process	Recombination occurring within or between DNA molecules in somatic cells. [GOC:ma]
6	GO:0007000	0.00359138	nucleolus organization	biological_process	A process that is carried out at the cellular level which results in the assembly, arrangement of constituent parts, or disassembly of the nucleolus. [GOC:dph, GOC:jid, GOC:jl, GOC:mah]
6	GO:0022603	0.0037257	regulation of anatomical structure morphogenesis	biological_process	Any process that modulates the frequency, rate or extent of anatomical structure morphogenesis. [GOC:mah]
6	GO:0006342	0.0047947	chromatin silencing	biological_process	Repression of transcription by altering the structure of chromatin, e.g. by conversion of large regions of DNA into an inaccessible state often called heterochromatin. [GOC:mah, PMID:10219245]
6	GO:0007050	0.00607611	cell cycle arrest	biological_process	A regulatory process that halts progression through the cell cycle during one of the normal phases (G1, S, G2, M). [GOC:dph, GOC:mah, GOC:tb]
6	GO:0009971	0.00607611	anastral spindle assembly involved in male meiosis	biological_process	The aggregation, arrangement and bonding together of a set of components to form the anastral spindle in male meiotic cells. [GOC:tb, PMID:11973272]
6	GO:0031508	0.00607611	centromeric heterochromatin assembly	biological_process	The assembly of chromatin into heterochromatin near the centromere. [GOC:mah]
6	GO:0090309	0.00607611	positive regulation of methylation-dependent chromatin silencing	biological_process	Any process that increases the rate, frequency, or extent of the repression of transcription by methylation of DNA, leading to the formation of heterochromatin. [GOC:BHF]
6	GO:0000724	0.00839287	double-strand break repair via homologous recombination	biological_process	The error-free repair of a double-strand break in DNA in which the broken DNA molecule is repaired using homologous sequences. A strand in the broken DNA searches for a homologous region in an intact chromosome to serve as the template for DNA synthesis. The restoration of two intact DNA molecules results in the exchange, reciprocal or nonreciprocal, of genetic material between the intact DNA mol…
6	GO:0016246	0.0119135	RNA interference	biological_process	The process in which double-stranded RNAs silence cognate genes. Involves posttranscriptional gene inactivation ('silencing') both of transgenes or dsRNA introduced into a germline, and of the host gene(s) homologous to the transgenes or dsRNA. This silencing is triggered by the introduction of transgenes or double-stranded RNA (dsRNA), and can occur through a specific decrease in the level of mR…
6	GO:0000076	0.0121163	DNA replication checkpoint	biological_process	A cell cycle checkpoint that prevents the initiation of nuclear division until DNA replication is complete, thereby ensuring that progeny inherit a full complement of the genome. [GOC:curators, GOC:rn, PMID:11728327, PMID:12537518]
6	GO:0010424	0.0121163	DNA methylation on cytosine within a CG sequence	biological_process	The covalent transfer of a methyl group to C-5 or N-4 of a cytosine located within a CG sequence in a DNA molecule. [GOC:dph, GOC:tb, PMID:17239600]
6	GO:0007267	0.0140505	cell-cell signaling	biological_process	Any process that mediates the transfer of information from one cell to another. [GOC:mah]
6	GO:0035194	0.014514	posttranscriptional gene silencing by RNA	biological_process	Any process of posttranscriptional gene inactivation (silencing) mediated by small RNA molecules that may trigger mRNA degradation or negatively regulate translation. [GOC:mah, PMID:15020054, PMID:15066275, PMID:15066283]
6	GO:0016441	0.0164133	posttranscriptional gene silencing	biological_process	The inactivation of gene expression by a posttranscriptional mechanism. [GOC:mah, PMID:15020054]
6	GO:0032776	0.0181207	DNA methylation on cytosine	biological_process	The covalent transfer of a methyl group to C-5 or N-4 of cytosine in a DNA molecule. [GOC:pf]
6	GO:0051510	0.0188564	regulation of unidimensional cell growth	biological_process	Any process that modulates the frequency, rate or extent of unidimensional cell growth, the process in which a cell irreversibly increases in size in one [spatial] dimension or along one axis. [GOC:ai]
6	GO:0022604	0.0198899	regulation of cell morphogenesis	biological_process	Any process that modulates the frequency, rate or extent of cell morphogenesis. Cell morphogenesis is the developmental process in which the shape of a cell is generated and organized. [GOC:isa_complete]
6	GO:0009616	0.0209468	virus induced gene silencing	biological_process	Specific posttranscriptional gene inactivation ('silencing') both of viral gene(s), and host gene(s) homologous to the viral genes. This silencing is triggered by viral infection, and occurs through a specific decrease in the level of mRNA of both host and viral genes. [GOC:jl]
6	GO:0052018	0.0209468	modulation by symbiont of RNA levels in host	biological_process	The alteration by an organism of the levels of RNA in the host organism. The host is defined as the larger of the organisms involved in a symbiotic interaction. [GOC:mtg_pamgo_17jul06]
6	GO:0052249	0.0209468	modulation of RNA levels in other organism involved in symbiotic interaction	biological_process	The alteration by an organism of the levels of RNA in a second organism, where the two organisms are in a symbiotic interaction. [GOC:mtg_pamgo_17jul06]
6	GO:0010087	0.0220267	phloem or xylem histogenesis	biological_process	The process whose specific outcome is the progression of phloem and/or xylem over time, from formation to the mature structure. An example of this process is found in Arabidopsis thaliana. [GOC:mtg_sensu, GOC:tb]
6	GO:0031570	0.0240896	DNA integrity checkpoint	biological_process	A cell cycle process that controls cell cycle progression in response to changes in DNA structure by monitoring the integrity of the DNA. The DNA integrity checkpoint begins with detection of DNA damage, defects in DNA structure or DNA replication, and progresses through signal transduction and ends with cell cycle effector processes. [GOC:mtg_cell_cycle]
6	GO:0001558	0.0242546	regulation of cell growth	biological_process	Any process that modulates the frequency, rate, extent or direction of cell growth. [GOC:go_curators]
6	GO:0010051	0.0242546	xylem and phloem pattern formation	biological_process	The regionalization process that gives rise to the patterning of the conducting tissues. An example of this process is found in Arabidopsis thaliana. [GOC:mtg_sensu, GOC:tb]
6	GO:0035821	0.0242546	modification of morphology or physiology of other organism	biological_process	The process in which an organism effects a change in the structure or processes of a second organism. [GOC:bf]
6	GO:0044003	0.0242546	modification by symbiont of host morphology or physiology	biological_process	The process in which an organism effects a change in the structure or processes of its host organism. The host is defined as the larger of the organisms involved in a symbiotic interaction. [GOC:cc]
6	GO:0045859	0.0242546	regulation of protein kinase activity	biological_process	Any process that modulates the frequency, rate or extent of protein kinase activity. [GOC:go_curators]
6	GO:0051817	0.0242546	modification of morphology or physiology of other organism involved in symbiotic interaction	biological_process	The process in which an organism effects a change in the structure or processes of a second organism, where the two organisms are in a symbiotic interaction. [GOC:cc]
6	GO:0044700	0.0247207	single organism signaling	biological_process	A signaling process occurring within a single organism. [GOC:jl]
6	GO:0023052	0.0249438	signaling	biological_process	The entirety of a process in which information is transmitted within a biological system. This process begins with an active signal and ends when a cellular response has been triggered. [GOC:mtg_signal, GOC:mtg_signaling_feb11, GOC:signaling]
6	GO:0001932	0.0254019	regulation of protein phosphorylation	biological_process	Any process that modulates the frequency, rate or extent of addition of phosphate groups into an amino acid in a protein. [GOC:hjd]
6	GO:0010267	0.0254019	production of ta-siRNAs involved in RNA interference	biological_process	Cleavage of double-stranded RNA to form trans-acting small interfering RNA molecules (siRNAs) of 21-23 nucleotides. ta-siRNAs arise from PolII genes and function like miRNAs to guide cleavage of target mRNAs. [GOC:tb, PMID:16129836]
6	GO:0043549	0.0254019	regulation of kinase activity	biological_process	Any process that modulates the frequency, rate or extent of kinase activity, the catalysis of the transfer of a phosphate group, usually from ATP, to a substrate molecule. [GOC:bf]
6	GO:0009555	0.027275	pollen development	biological_process	The process whose specific outcome is the progression of the pollen grain over time, from its formation to the mature structure. The process begins with the meiosis of the microsporocyte to form four haploid microspores. The nucleus of each microspore then divides by mitosis to form a two-celled organism, the pollen grain, that contains a tube cell as well as a smaller generative cell. The pollen…
6	GO:0042325	0.030207	regulation of phosphorylation	biological_process	Any process that modulates the frequency, rate or extent of addition of phosphate groups into a molecule. [GOC:jl]
6	GO:0051338	0.030207	regulation of transferase activity	biological_process	Any process that modulates the frequency, rate or extent of transferase activity, the catalysis of the transfer of a group, e.g. a methyl group, glycosyl group, acyl group, phosphorus-containing, or other groups, from one compound (generally regarded as the donor) to another compound (generally regarded as the acceptor). Transferase is the systematic name for any enzyme of EC class 2. [EC:2.-.-.-…
6	GO:0044403	0.0314608	symbiosis, encompassing mutualism through parasitism	biological_process	An interaction between two organisms living together in more or less intimate association. The term host is usually used for the larger (macro) of the two members of a symbiosis. The smaller (micro) member is called the symbiont organism. Microscopic symbionts are often referred to as endosymbionts. The various forms of symbiosis include parasitism, in which the association is disadvantageous or …
6	GO:0051701	0.0314608	interaction with host	biological_process	An interaction between two organisms living together in more or less intimate association. The term host is used for the larger (macro) of the two members of a symbiosis; the various forms of symbiosis include parasitism, commensalism and mutualism. [GOC:cc]
6	GO:0009886	0.0315647	post-embryonic morphogenesis	biological_process	The process, occurring after embryonic development, by which anatomical structures are generated and organized. [GOC:go_curators]
6	GO:0044419	0.032735	interspecies interaction between organisms	biological_process	Any process in which an organism has an effect on an organism of a different species. [GOC:cc]
6	GO:0035196	0.0366774	production of miRNAs involved in gene silencing by miRNA	biological_process	Cleavage of stem-loop RNA precursors into microRNAs (miRNAs), a class of small RNAs that primarily silence genes by blocking the translation of mRNA transcripts into protein. [GOC:dph, GOC:tb, PMID:15066275, PMID:15066283]
6	GO:0010608	0.0380043	posttranscriptional regulation of gene expression	biological_process	Any process that modulates the frequency, rate or extent of gene expression after the production of an RNA transcript. [GOC:dph, GOC:tb]
6	GO:0030422	0.0407937	production of siRNA involved in RNA interference	biological_process	Cleavage of double-stranded RNA to form small interfering RNA molecules (siRNAs) of 21-23 nucleotides, in the context of RNA interference. [GOC:mah, PMID:11524674]
6	GO:0000075	0.041785	cell cycle checkpoint	biological_process	A cell cycle process that controls cell cycle progression by monitoring the integrity of specific cell cycle events. A cell cycle checkpoint begins with detection of deficiencies or defects and ends with signal transduction. [GOC:mtg_cell_cycle]
6	GO:0010492	0.041785	maintenance of shoot apical meristem identity	biological_process	The process in which an organism retains a population of shoot apical meristem cells, preventing the commitment of all stem cell progeny to a differentiated cell fate. [GOC:dph, GOC:tb, PMID:17461786]
6	GO:1901988	0.041785	negative regulation of cell cycle phase transition	biological_process	Any process that stops, prevents or reduces the frequency, rate or extent of cell cycle phase transition. [GOC:mtg_cell_cycle, GOC:TermGenie, PMID:22841721]
6	GO:0031050	0.043631	dsRNA fragmentation	biological_process	Cleavage of double-stranded RNA molecules by an RNaseIII-family enzyme to produce small RNAs (generally 20-30 nucleotides, depending on species) with biological function. [GOC:ns]
6	GO:0035195	0.043631	gene silencing by miRNA	biological_process	Downregulation of gene expression through the action of microRNAs (miRNAs), endogenous 21-24 nucleotide small RNAs processed from stem-loop RNA precursors (pre-miRNAs). Once incorporated into a RNA-induced silencing complex (RISC), miRNAs can downregulate gene expression by either of two posttranscriptional mechanisms: mRNA cleavage or translational repression. [PMID:14744438, PMID:15066275, PMID…
6	GO:0043331	0.043631	response to dsRNA	biological_process	Any process that results in a change in state or activity of a cell or an organism (in terms of movement, secretion, enzyme production, gene expression, etc.) as a result of a double-stranded RNA stimulus. [GOC:jl]
6	GO:0070918	0.043631	production of small RNA involved in gene silencing by RNA	biological_process	The process in which a double-stranded RNA precursor is processed into short (20-30 nt) fragments. RNA cleavage is catalyzed by a Dicer endonuclease. [GOC:mah, PMID:19239886]
6	GO:0071359	0.043631	cellular response to dsRNA	biological_process	Any process that results in a change in state or activity of a cell (in terms of movement, secretion, enzyme production, gene expression, etc.) as a result of a double-stranded RNA stimulus. [GOC:mah]
6	GO:0051607	0.0465402	defense response to virus	biological_process	Reactions triggered in response to the presence of a virus that act to protect the cell or organism. [GOC:ai]
7	GO:0019458	0.00783499	methionine catabolic process via 2-oxobutanoate	biological_process	The chemical reactions and pathways resulting in the breakdown of methionine, via the intermediate 2-oxobutanoate. [GOC:go_curators]
7	GO:0019593	0.00783499	mannitol biosynthetic process	biological_process	The chemical reactions and pathways resulting in the formation of mannitol, the alditol derived from D-mannose by reduction of the aldehyde group. [ISBN:0198506732]
7	GO:0032197	0.00783499	transposition, RNA-mediated	biological_process	Any process involved in a type of transpositional recombination which occurs via an RNA intermediate. [GOC:jp, ISBN:1555812090]
7	GO:0090241	0.00783499	negative regulation of histone H4 acetylation	biological_process	Any process that decreases the rate, frequency, or extent of histone H4 acetylation, the modification of histone H4 by the addition of an acetyl group. [GOC:dph, GOC:tb]
7	GO:0048443	0.0140507	stamen development	biological_process	The process whose specific outcome is the progression of the stamen over time, from its formation to the mature structure. [GOC:go_curators]
7	GO:0048466	0.0140507	androecium development	biological_process	The process whose specific outcome is the progression of the androecium over time, from its formation to the mature structure. [GOC:go_curators]
7	GO:0006346	0.0152429	methylation-dependent chromatin silencing	biological_process	Repression of transcription by methylation of DNA, leading to the formation of heterochromatin. [GOC:mah]
7	GO:0006344	0.0156098	maintenance of chromatin silencing	biological_process	The maintenance of chromatin in a transcriptionally silent state such as heterochromatin. [GOC:mah]
7	GO:0010588	0.0156098	cotyledon vascular tissue pattern formation	biological_process	Vascular tissue pattern formation as it occurs in the cotyledon of vascular plants. [PMID:10559439]
7	GO:0015692	0.0156098	lead ion transport	biological_process	The directed movement of lead (Pb) ions into, out of or within a cell, or between cells, by means of some agent such as a transporter or pore. [GOC:ai]
7	GO:0051289	0.0156098	protein homotetramerization	biological_process	The formation of a protein homotetramer, a macromolecular structure consisting of four noncovalently associated identical subunits. [GOC:go_curators]
7	GO:0051574	0.0156098	positive regulation of histone H3-K9 methylation	biological_process	Any process that activates or increases the frequency, rate or extent of the covalent addition of a methyl group to the lysine at position 9 of histone H3. [GOC:ai]
7	GO:0071421	0.0156098	manganese ion transmembrane transport	biological_process	A process in which a manganese ion is transported from one side of a membrane to the other by means of some agent such as a transporter or pore. [GOC:mah]
7	GO:0080086	0.0156098	stamen filament development	biological_process	The process whose specific outcome is the progression of the filament over time, from its formation to the mature structure. Filament is the stalk of a stamen. [PMID:19139039, PO:0009067]
7	GO:0080175	0.0156098	phragmoplast microtubule organization	biological_process	A process that is carried out at the cellular level which results in the assembly, arrangement of constituent parts, or disassembly of structures formed of microtubules and associated proteins in phragmoplast, a plant cell specific structure that forms during late cytokinesis. Phragmoplast serves as a scaffold for cell plate assembly and subsequent formation of a new cell wall separating the two …
7	GO:2000379	0.0156098	positive regulation of reactive oxygen species metabolic process	biological_process	Any process that activates or increases the frequency, rate or extent of reactive oxygen species metabolic process. [GOC:mah]
7	GO:0006828	0.023325	manganese ion transport	biological_process	The directed movement of manganese (Mn) ions into, out of or within a cell, or between cells, by means of some agent such as a transporter or pore. [GOC:ai]
7	GO:0009970	0.023325	cellular response to sulfate starvation	biological_process	Any process that results in a change in state or activity of a cell (in terms of movement, secretion, enzyme production, gene expression, etc.) as a result of deprivation of sulfate. [GOC:sm]
7	GO:0031058	0.023325	positive regulation of histone modification	biological_process	Any process that activates or increases the frequency, rate or extent of the covalent alteration of a histone. [GOC:mah]
7	GO:0031062	0.023325	positive regulation of histone methylation	biological_process	Any process that activates or increases the frequency, rate or extent of the covalent addition of methyl groups to histones. [GOC:mah]
7	GO:0051262	0.023325	protein tetramerization	biological_process	The formation of a protein tetramer, a macromolecular structure consisting of four noncovalently associated identical or nonidentical subunits. [GOC:ecd]
7	GO:0051570	0.023325	regulation of histone H3-K9 methylation	biological_process	Any process that modulates the frequency, rate or extent of the covalent addition of a methyl group to the lysine at position 9 of histone H3. [GOC:ai]
7	GO:0008283	0.0234089	cell proliferation	biological_process	The multiplication or reproduction of cells, resulting in the expansion of a cell population. [GOC:mah, GOC:mb]
7	GO:0016246	0.0235742	RNA interference	biological_process	The process in which double-stranded RNAs silence cognate genes. Involves posttranscriptional gene inactivation ('silencing') both of transgenes or dsRNA introduced into a germline, and of the host gene(s) homologous to the transgenes or dsRNA. This silencing is triggered by the introduction of transgenes or double-stranded RNA (dsRNA), and can occur through a specific decrease in the level of mR…
7	GO:0015996	0.0256865	chlorophyll catabolic process	biological_process	The chemical reactions and pathways resulting in the breakdown of chlorophyll, any compound of magnesium complexed in a porphyrin (tetrapyrrole) ring and which functions as a photosynthetic pigment, into less complex products. [GOC:jl]
7	GO:0046149	0.0256865	pigment catabolic process	biological_process	The chemical reactions and pathways resulting in the breakdown of a pigment, any general or particular coloring matter in living organisms, e.g. melanin. [ISBN:0198506732]
7	GO:0009267	0.0268033	cellular response to starvation	biological_process	Any process that results in a change in state or activity of a cell (in terms of movement, secretion, enzyme production, gene expression, etc.) as a result of deprivation of nourishment. [GOC:jl]
7	GO:0006787	0.0272088	porphyrin-containing compound catabolic process	biological_process	The chemical reactions and pathways resulting in the breakdown of any member of a large group of derivatives or analogs of porphyrin. Porphyrin consists of a ring of four pyrrole nuclei linked each to the next at their alpha positions through a methine group. [GOC:jl, ISBN:0198506732]
7	GO:0033015	0.0272088	tetrapyrrole catabolic process	biological_process	The chemical reactions and pathways leading to the breakdown of tetrapyrroles, natural pigments containing four pyrrole rings joined by one-carbon units linking position 2 of one pyrrole ring to position 5 of the next. [CHEBI:26932, GOC:mah]
7	GO:0051187	0.0272088	cofactor catabolic process	biological_process	The chemical reactions and pathways resulting in the breakdown of a cofactor, a substance that is required for the activity of an enzyme or other protein. [GOC:ai]
7	GO:0035194	0.0285026	posttranscriptional gene silencing by RNA	biological_process	Any process of posttranscriptional gene inactivation (silencing) mediated by small RNA molecules that may trigger mRNA degradation or negatively regulate translation. [GOC:mah, PMID:15020054, PMID:15066275, PMID:15066283]
7	GO:0042594	0.0285026	response to starvation	biological_process	Any process that results in a change in state or activity of a cell or an organism (in terms of movement, secretion, enzyme production, gene expression, etc.) as a result of a starvation stimulus, deprivation of nourishment. [GOC:go_curators]
7	GO:0072593	0.0286169	reactive oxygen species metabolic process	biological_process	The chemical reactions and pathways involving a reactive oxygen species, any molecules or ions formed by the incomplete one-electron reduction of oxygen. They contribute to the microbicidal activity of phagocytes, regulation of signal transduction and gene expression, and the oxidative damage to biopolymers. [CHEBI:26523, GOC:mah]
7	GO:0051704	0.0289693	multi-organism process	biological_process	A biological process which involves another organism of the same or different species. [GOC:jl]
7	GO:0009620	0.0304953	response to fungus	biological_process	Any process that results in a change in state or activity of a cell or an organism (in terms of movement, secretion, enzyme production, gene expression, etc.) as a result of a stimulus from a fungus. [GOC:hb]
7	GO:0000912	0.0309809	assembly of actomyosin apparatus involved in cytokinesis	biological_process	The assembly and arrangement of an apparatus composed of actin, myosin, and associated proteins that will function in cytokinesis. [GOC:mtg_cell_cycle]
7	GO:0000914	0.0309809	phragmoplast assembly	biological_process	The formation of a structure composed of actin, myosin, and associated proteins that will function in cytokinesis in cells that perform cytokinesis by cell plate formation. The structure usually contains antiparallel microtubules and membrane (often visible as vesicles). [GOC:clt]
7	GO:0031032	0.0309809	actomyosin structure organization	biological_process	A process that is carried out at the cellular level which results in the assembly, arrangement of constituent parts, or disassembly of cytoskeletal structures containing both actin and myosin or paramyosin. The myosin may be organized into filaments. [GOC:dph, GOC:jl, GOC:mah]
7	GO:0031060	0.0309809	regulation of histone methylation	biological_process	Any process that modulates the frequency, rate or extent of the covalent addition of methyl groups to histones. [GOC:mah]
7	GO:0031669	0.0311573	cellular response to nutrient levels	biological_process	Any process that results in a change in state or activity of a cell (in terms of movement, secretion, enzyme production, gene expression, etc.) as a result of a stimulus reflecting the presence, absence, or concentration of nutrients. [GOC:mah]
7	GO:0016441	0.0320703	posttranscriptional gene silencing	biological_process	The inactivation of gene expression by a posttranscriptional mechanism. [GOC:mah, PMID:15020054]
7	GO:0009414	0.033786	response to water deprivation	biological_process	Any process that results in a change in state or activity of a cell or an organism (in terms of movement, secretion, enzyme production, gene expression, etc.) as a result of a water deprivation stimulus, prolonged deprivation of water. [GOC:lr]
7	GO:0009607	0.0341816	response to biotic stimulus	biological_process	Any process that results in a change in state or activity of a cell or an organism (in terms of movement, secretion, enzyme production, gene expression, etc.) as a result of a biotic stimulus, a stimulus caused or produced by a living organism. [GOC:hb]
7	GO:0051707	0.0341816	response to other organism	biological_process	Any process that results in a change in state or activity of a cell or an organism (in terms of movement, secretion, enzyme production, gene expression, etc.) as a result of a stimulus from another living organism. [GOC:ai]
7	GO:0009415	0.0344682	response to water stimulus	biological_process	Any process that results in a change in state or activity of a cell or an organism (in terms of movement, secretion, enzyme production, gene expression, etc.) as a result of a stimulus reflecting the presence, absence, or concentration of water. [GOC:jl]
7	GO:0045892	0.035857	negative regulation of transcription, DNA-dependent	biological_process	Any process that stops, prevents, or reduces the frequency, rate or extent of cellular DNA-dependent transcription. [GOC:go_curators, GOC:txnOH]
7	GO:0051253	0.035857	negative regulation of RNA metabolic process	biological_process	Any process that stops, prevents, or reduces the frequency, rate or extent of the chemical reactions and pathways involving RNA. [GOC:ai]
7	GO:0031667	0.0358623	response to nutrient levels	biological_process	Any process that results in a change in state or activity of a cell or an organism (in terms of movement, secretion, enzyme production, gene expression, etc.) as a result of a stimulus reflecting the presence, absence, or concentration of nutrients. [GOC:mah]
7	GO:0007010	0.0362798	cytoskeleton organization	biological_process	A process that is carried out at the cellular level which results in the assembly, arrangement of constituent parts, or disassembly of cytoskeletal structures. [GOC:dph, GOC:jl, GOC:mah]
7	GO:0005986	0.038578	sucrose biosynthetic process	biological_process	The chemical reactions and pathways resulting in the formation of sucrose, the disaccharide fructofuranosyl-glucopyranoside. [GOC:go_curators]
7	GO:0006349	0.038578	regulation of gene expression by genetic imprinting	biological_process	Heritable alterations in the activity of a gene that depend on whether it passed through the paternal or the maternal germline, but that are not encoded by DNA itself. [GOC:ems, ISBN:0198506732, PMID:11498578]
7	GO:0006730	0.038578	one-carbon metabolic process	biological_process	The chemical reactions and pathways involving the transfer of one-carbon units in various oxidation states. [GOC:hjd, GOC:mah, GOC:pde]
7	GO:0010325	0.038578	raffinose family oligosaccharide biosynthetic process	biological_process	The chemical reactions and pathways resulting in the formation of raffinose family oligosaccharides (RFOs, such as raffinose, stachyose, verbascose and other molecules with a higher degree of galactosyl polymerization). [GOC:tair_curators]
7	GO:0015691	0.038578	cadmium ion transport	biological_process	The directed movement of cadmium (Cd) ions into, out of or within a cell, or between cells, by means of some agent such as a transporter or pore. [GOC:ai]
7	GO:0016093	0.038578	polyprenol metabolic process	biological_process	The chemical reactions and pathways involving polyprenols, prenols with more than 4 isoprenoid residues, which may be all-trans, or a mixture of cis and trans. [http://www.chem.qmul.ac.uk/iupac/misc/prenol.html#p2, ISBN:0198547684]
7	GO:0016094	0.038578	polyprenol biosynthetic process	biological_process	The chemical reactions and pathways resulting in the formation of polyprenols, prenols with more than 4 isoprenoid residues, which may be all-trans, or a mixture of cis and trans. [GOC:go_curators, http://www.chem.qmul.ac.uk/iupac/misc/prenol.html#p2]
7	GO:0019348	0.038578	dolichol metabolic process	biological_process	The chemical reactions and pathways involving dolichols, any 2,3-dihydropolyprenol derived from four or more linked isoprene units. [ISBN:0198506732]
7	GO:0019408	0.038578	dolichol biosynthetic process	biological_process	The chemical reactions and pathways resulting in the formation of dolichols, any 2,3-dihydropolyprenol derived from four or more linked isoprene units. [ISBN:0198506732]
7	GO:0051260	0.038578	protein homooligomerization	biological_process	The process of creating protein oligomers, compounds composed of a small number, usually between three and ten, of identical component monomers. Oligomers may be formed by the polymerization of a number of monomers or the depolymerization of a large protein polymer. [GOC:ai]
7	GO:0071514	0.038578	genetic imprinting	biological_process	Any process that modulates the frequency, rate or extent of the chemical reactions and pathways involving macromolecules by a mechanism that is mediated by DNA, is mitotically or meiotically heritable, or is stably self-propagated in the cytoplasm of a resting cell, and does not entail a change in DNA sequence. [GOC:mah, GOC:vw]
7	GO:2001252	0.038578	positive regulation of chromosome organization	biological_process	Any process that activates or increases the frequency, rate or extent of chromosome organization. [GOC:obol]
7	GO:0045934	0.0387317	negative regulation of nucleobase-containing compound metabolic process	biological_process	Any cellular process that stops, prevents, or reduces the frequency, rate or extent of the chemical reactions and pathways involving nucleobases, nucleosides, nucleotides and nucleic acids. [GOC:go_curators]
7	GO:0048438	0.0387317	floral whorl development	biological_process	The process whose specific outcome is the progression of a floral whorl over time, from its formation to the mature structure. A floral whorl is a circular arrangement of parts of a flower arising from a stem of a plant. [GOC:dph, GOC:go_curators, GOC:PO_curators, GOC:tb, PO:0025023]
7	GO:0044036	0.0388524	cell wall macromolecule metabolic process	biological_process	The chemical reactions and pathways involving macromolecules forming, or destined to form, part of the cell wall. A cell wall is a rigid or semi-rigid envelope lying outside the cell membrane of plant, fungal and most prokaryotic cells, maintaining their shape and protecting them from osmotic lysis. [GOC:jl, GOC:mah]
7	GO:0010558	0.0402177	negative regulation of macromolecule biosynthetic process	biological_process	Any process that decreases the rate, frequency or extent of the chemical reactions and pathways resulting in the formation of a macromolecule, any molecule of high relative molecular mass, the structure of which essentially comprises the multiple repetition of units derived, actually or conceptually, from molecules of low relative molecular mass. [GOC:dph, GOC:tb]
7	GO:0051172	0.0402177	negative regulation of nitrogen compound metabolic process	biological_process	Any process that stops, prevents, or reduces the frequency, rate or extent of the chemical reactions and pathways involving nitrogen or nitrogenous compounds. [GOC:ai, GOC:tb]
7	GO:2000113	0.0402177	negative regulation of cellular macromolecule biosynthetic process	biological_process	Any process that stops, prevents, or reduces the frequency, rate or extent of cellular macromolecule biosynthetic process. [GOC:obol]
7	GO:0031327	0.044075	negative regulation of cellular biosynthetic process	biological_process	Any process that stops, prevents, or reduces the frequency, rate or extent of the chemical reactions and pathways resulting in the formation of substances, carried out by individual cells. [GOC:mah]
7	GO:0009890	0.0448709	negative regulation of biosynthetic process	biological_process	Any process that stops, prevents, or reduces the rate of the chemical reactions and pathways resulting in the formation of substances. [GOC:go_curators]
7	GO:0031668	0.0452037	cellular response to extracellular stimulus	biological_process	Any process that results in a change in state or activity of a cell (in terms of movement, secretion, enzyme production, gene expression, etc.) as a result of an extracellular stimulus. [GOC:mah]
7	GO:0044030	0.0461167	regulation of DNA methylation	biological_process	Any process that modulates the frequency, rate or extent of the covalent transfer of a methyl group to either N-6 of adenine or C-5 or N-4 of cytosine. [GOC:jl]
7	GO:0048829	0.0461167	root cap development	biological_process	The process whose specific outcome is the progression of the root cap over time, from its formation to the mature structure. The root cap protects the root meristem from friction as the root grows through the soil. The cap is made up of a group of parenchyma cells which secrete a glycoprotein mucilage as a lubricant. [GOC:tb]
7	GO:0050832	0.0463098	defense response to fungus	biological_process	Reactions triggered in response to the presence of a fungus that act to protect the cell or organism. [GOC:ai]
7	GO:0071496	0.0463098	cellular response to external stimulus	biological_process	Any process that results in a change in state or activity of a cell (in terms of movement, secretion, enzyme production, gene expression, etc.) as a result of an external stimulus. [GOC:mah]
8	GO:0009831	0.000132687	plant-type cell wall modification involved in multidimensional cell growth	biological_process	The series of events that occur during cell growth that result in chemical or structural changes to existing cell walls of the type composed chiefly of cellulose and pectin. An example of this is found in Arabidopsis thaliana. [GOC:lr, GOC:mtg_sensu]
8	GO:0009828	0.000460259	plant-type cell wall loosening	biological_process	The series of events causing chemical and structural alterations of an existing cellulose and pectin-containing cell wall that results in greater extensibility of the wall. An example of this is found in Arabidopsis thaliana. [GOC:lr, GOC:mtg_sensu]
8	GO:0006949	0.000784318	syncytium formation	biological_process	The formation of a syncytium, a mass of cytoplasm containing several nuclei enclosed within a single plasma membrane. Syncytia are normally derived from single cells that fuse or fail to complete cell division. [ISBN:0198506732]
8	GO:0016036	0.00167718	cellular response to phosphate starvation	biological_process	Any process that results in a change in state or activity of a cell (in terms of movement, secretion, enzyme production, gene expression, etc.) as a result of deprivation of phosphate. [GOC:jl]
8	GO:0009826	0.00463797	unidimensional cell growth	biological_process	The process in which a cell irreversibly increases in size in one [spatial] dimension or along one axis, resulting in the morphogenesis of the cell. [ISBN:0943088399]
8	GO:0010245	0.00479693	radial microtubular system formation	biological_process	Formation of radial microtubular systems during male meiotic cytokinesis in plants. [GOC:syr]
8	GO:0010266	0.00479693	response to vitamin B1	biological_process	Any process that results in a change in state or activity of a cell or an organism (in terms of movement, secretion, enzyme production, gene expression, etc.) as a result of a vitamin B1 stimulus. [GOC:pz]
8	GO:0000710	0.00957161	meiotic mismatch repair	biological_process	A system for the identification and correction of base-base mismatches, small insertion-deletion loops, and regions of heterology that are present in duplex DNA formed with strands from two recombining molecules. Correction of the mismatch can result in non-Mendelian segregation of alleles following meiosis. [GOC:elh, PMID:10357855]
8	GO:0007112	0.00957161	male meiosis cytokinesis	biological_process	A cell cycle process that occurs as part of the male meiotic cell cycle and results in the division of the cytoplasm of a cell to produce two daughter cells. [GOC:ai]
8	GO:0009228	0.00957161	thiamine biosynthetic process	biological_process	The chemical reactions and pathways resulting in the formation of thiamine (vitamin B1), a water soluble vitamin present in fresh vegetables and meats, especially liver. [CHEBI:18385, GOC:jl, ISBN:0198506732]
8	GO:0030643	0.00957161	cellular phosphate ion homeostasis	biological_process	Any process involved in the maintenance of an internal steady state of phosphate ions at the level of a cell. [GOC:mah]
8	GO:0043570	0.00957161	maintenance of DNA repeat elements	biological_process	Any process involved in sustaining the fidelity and copy number of DNA repeat elements. [GOC:jl]
8	GO:0019374	0.0113461	galactolipid metabolic process	biological_process	The chemical reactions and pathways involving galactolipids, any glycolipid containing one of more residues of galactose and/or N-acetylgalactosamine. [ISBN:0198506732]
8	GO:0019375	0.0113461	galactolipid biosynthetic process	biological_process	The chemical reactions and pathways resulting in the formation of galactolipids, any glycolipid containing one of more residues of galactose and/or N-acetylgalactosamine. [ISBN:0198506732]
8	GO:0051510	0.0119981	regulation of unidimensional cell growth	biological_process	Any process that modulates the frequency, rate or extent of unidimensional cell growth, the process in which a cell irreversibly increases in size in one [spatial] dimension or along one axis. [GOC:ai]
8	GO:0009247	0.0126663	glycolipid biosynthetic process	biological_process	The chemical reactions and pathways resulting in the formation of glycolipid, a class of 1,2-di-O-acylglycerols joined at oxygen 3 by a glycosidic linkage to a carbohydrate part (usually a mono-, di- or tri-saccharide). [CHEBI:33563, GOC:go_curators]
8	GO:0022604	0.0126663	regulation of cell morphogenesis	biological_process	Any process that modulates the frequency, rate or extent of cell morphogenesis. Cell morphogenesis is the developmental process in which the shape of a cell is generated and organized. [GOC:isa_complete]
8	GO:0000018	0.0143241	regulation of DNA recombination	biological_process	Any process that modulates the frequency, rate or extent of DNA recombination, a DNA metabolic process in which a new genotype is formed by reassortment of genes resulting in gene combinations different from those that were present in the parents. [GOC:go_curators, ISBN:0198506732]
8	GO:0045910	0.0143241	negative regulation of DNA recombination	biological_process	Any process that stops, prevents, or reduces the frequency, rate or extent of DNA recombination. [GOC:go_curators]
8	GO:2000123	0.0143241	positive regulation of stomatal complex development	biological_process	Any process that activates or increases the frequency, rate or extent of stomatal complex development. [GOC:obol]
8	GO:0031324	0.0154964	negative regulation of cellular metabolic process	biological_process	Any process that stops, prevents, or reduces the frequency, rate or extent of the chemical reactions and pathways by which individual cells transform chemical substances. [GOC:mah]
8	GO:0001558	0.0154973	regulation of cell growth	biological_process	Any process that modulates the frequency, rate, extent or direction of cell growth. [GOC:go_curators]
8	GO:0006664	0.0154973	glycolipid metabolic process	biological_process	The chemical reactions and pathways involving glycolipids, a class of 1,2-di-O-acylglycerols joined at oxygen 3 by a glycosidic linkage to a carbohydrate part (usually a mono-, di- or tri-saccharide). Some substances classified as bacterial glycolipids have the sugar group acylated by one or more fatty acids and the glycerol group may be absent. [CHEBI:33563, ISBN:0198547684]
8	GO:0016045	0.0190546	detection of bacterium	biological_process	The series of events in which a stimulus from a bacterium is received and converted into a molecular signal. [GOC:hb]
8	GO:0016998	0.0190546	cell wall macromolecule catabolic process	biological_process	The chemical reactions and pathways resulting in the breakdown of macromolecules that form part of a cell wall. [GOC:go_curators]
8	GO:2000112	0.0202882	regulation of cellular macromolecule biosynthetic process	biological_process	Any process that modulates the frequency, rate or extent of cellular macromolecule biosynthetic process. [GOC:obol]
8	GO:0010389	0.0210376	regulation of G2/M transition of mitotic cell cycle	biological_process	Any process that modulates the rate or extent of progression from G2 phase to M phase of the mitotic cell cycle. [GOC:mtg_cell_cycle, PMID:17329565]
8	GO:0010556	0.0210585	regulation of macromolecule biosynthetic process	biological_process	Any process that modulates the rate, frequency or extent of the chemical reactions and pathways resulting in the formation of a macromolecule, any molecule of high relative molecular mass, the structure of which essentially comprises the multiple repetition of units derived, actually or conceptually, from molecules of low relative molecular mass. [GOC:dph, GOC:tb]
8	GO:0048638	0.0213607	regulation of developmental growth	biological_process	Any process that modulates the frequency, rate or extent of developmental growth. [GOC:go_curators]
8	GO:0000086	0.0218875	G2/M transition of mitotic cell cycle	biological_process	The mitotic cell cycle transition by which a cell in G2 commits to M phase. The process begins when the kinase activity of M cyclin/CDK complex reaches a threshold high enough for the cell cycle to proceed. This is accomplished by activating a positive feedback loop that results in the accumulation of unphosphorylated and active M cyclin/CDK complex. [GOC:mtg_cell_cycle]
8	GO:0019219	0.0221726	regulation of nucleobase-containing compound metabolic process	biological_process	Any cellular process that modulates the frequency, rate or extent of the chemical reactions and pathways involving nucleobases, nucleosides, nucleotides and nucleic acids. [GOC:go_curators]
8	GO:0000280	0.0236297	nuclear division	biological_process	The division of a cell nucleus into two nuclei, with DNA and other nuclear contents distributed between the daughter nuclei. [GOC:mah]
8	GO:0009558	0.0237632	embryo sac cellularization	biological_process	The process in which the eight-nucleate single celled female gametophyte develops into the seven-celled female gametophyte. This mature structure contains two synergid cells and an egg cell at the micropylar end, and three antipodal cells at the other end. A binucleate endosperm mother cell is formed at the center. An example of this process is found in Arabidopsis thaliana. [GOC:jid, GOC:mtg_pla…
8	GO:0051053	0.0237632	negative regulation of DNA metabolic process	biological_process	Any process that stops, prevents, or reduces the frequency, rate or extent of the chemical reactions and pathways involving DNA. [GOC:ai]
8	GO:0080092	0.0237632	regulation of pollen tube growth	biological_process	Any process that modulates the frequency, rate or extent of pollen tube growth. [PMID:19208902]
8	GO:0051171	0.0243548	regulation of nitrogen compound metabolic process	biological_process	Any process that modulates the frequency, rate or extent of the chemical reactions and pathways involving nitrogen or nitrogenous compounds. [GOC:ai, GOC:tb]
8	GO:0046467	0.0245217	membrane lipid biosynthetic process	biological_process	The chemical reactions and pathways resulting in the formation of membrane lipids, any lipid found in or associated with a biological membrane. [GOC:ai]
8	GO:1901990	0.0245217	regulation of mitotic cell cycle phase transition	biological_process	Any process that modulates the frequency, rate or extent of mitotic cell cycle phase transition. [GOC:mtg_cell_cycle, GOC:TermGenie, PMID:22841721]
8	GO:0040008	0.0251161	regulation of growth	biological_process	Any process that modulates the frequency, rate or extent of the growth of all or part of an organism so that it occurs at its proper speed, either globally or in a specific part of the organism's development. [GOC:ems, GOC:mah]
8	GO:0022603	0.0254274	regulation of anatomical structure morphogenesis	biological_process	Any process that modulates the frequency, rate or extent of anatomical structure morphogenesis. [GOC:mah]
8	GO:1901987	0.0254274	regulation of cell cycle phase transition	biological_process	Any process that modulates the frequency, rate or extent of cell cycle phase transition. [GOC:mtg_cell_cycle, GOC:TermGenie, PMID:22841721]
8	GO:0044772	0.0263467	mitotic cell cycle phase transition	biological_process	The cell cycle process by which a cell commits to entering the next mitotic cell cycle phase. [GOC:mtg_cell_cycle]
8	GO:0080167	0.0263467	response to karrikin	biological_process	Any process that results in a change in state or activity of a cell or an organism (in terms of movement, secretion, enzyme production, gene expression, etc.) as a result of a karrikin stimulus. Karrikins are signaling molecules in smoke from burning vegetation that trigger seed germination for many angiosperms (flowering plants). [PMID:20351290]
8	GO:0044770	0.0272794	cell cycle phase transition	biological_process	The cell cycle process by which a cell commits to entering the next cell cycle phase. [GOC:mtg_cell_cycle]
8	GO:0010769	0.0284499	regulation of cell morphogenesis involved in differentiation	biological_process	Any process that modulates the frequency, rate or extent of cell morphogenesis contributing to cell differentiation. Cell morphogenesis involved in differentiation is the change in form (cell shape and size) that occurs when relatively unspecialized cells acquire specialized structural and/or functional features that characterize the cells, tissues, or organs of the mature organism or some other …
8	GO:2000038	0.0284499	regulation of stomatal complex development	biological_process	Any process that modulates the frequency, rate or extent of stomatal complex development. [GOC:obol]
8	GO:0031326	0.029576	regulation of cellular biosynthetic process	biological_process	Any process that modulates the frequency, rate or extent of the chemical reactions and pathways resulting in the formation of substances, carried out by individual cells. [GOC:mah]
8	GO:0009889	0.0303823	regulation of biosynthetic process	biological_process	Any process that modulates the frequency, rate or extent of the chemical reactions and pathways resulting in the formation of substances. [GOC:go_curators]
8	GO:0010605	0.0313443	negative regulation of macromolecule metabolic process	biological_process	Any process that decreases the frequency, rate or extent of the chemical reactions and pathways involving macromolecules, any molecule of high relative molecular mass, the structure of which essentially comprises the multiple repetition of units derived, actually or conceptually, from molecules of low relative molecular mass. [GOC:dph, GOC:tb]
8	GO:0009059	0.0316445	macromolecule biosynthetic process	biological_process	The chemical reactions and pathways resulting in the formation of a macromolecule, any molecule of high relative molecular mass, the structure of which essentially comprises the multiple repetition of units derived, actually or conceptually, from molecules of low relative molecular mass. [CHEBI:33694, GOC:mah]
8	GO:0006643	0.03214	membrane lipid metabolic process	biological_process	The chemical reactions and pathways involving membrane lipids, any lipid found in or associated with a biological membrane. [GOC:ai]
8	GO:0007349	0.0331148	cellularization	biological_process	The separation of a multi-nucleate cell or syncytium into individual cells. An example of this is found in Drosophila melanogaster embryo development. [GOC:go_curators, GOC:mtg_sensu, ISBN:0716731363]
8	GO:0060284	0.0331148	regulation of cell development	biological_process	Any process that modulates the rate, frequency or extent of the progression of the cell over time, from its formation to the mature structure. Cell development does not include the steps involved in committing a cell to a specific fate. [GOC:dph, GOC:tb]
8	GO:0048285	0.0341735	organelle fission	biological_process	The creation of two or more organelles by division of one organelle. [GOC:jid]
8	GO:0009892	0.038046	negative regulation of metabolic process	biological_process	Any process that stops, prevents, or reduces the frequency, rate or extent of the chemical reactions and pathways within a cell or an organism. [GOC:go_curators]
8	GO:0007346	0.0383876	regulation of mitotic cell cycle	biological_process	Any process that modulates the rate or extent of progress through the mitotic cell cycle. [GOC:dph, GOC:go_curators, GOC:tb]
8	GO:0045934	0.0428357	negative regulation of nucleobase-containing compound metabolic process	biological_process	Any cellular process that stops, prevents, or reduces the frequency, rate or extent of the chemical reactions and pathways involving nucleobases, nucleosides, nucleotides and nucleic acids. [GOC:go_curators]
8	GO:0051172	0.0441496	negative regulation of nitrogen compound metabolic process	biological_process	Any process that stops, prevents, or reduces the frequency, rate or extent of the chemical reactions and pathways involving nitrogen or nitrogenous compounds. [GOC:ai, GOC:tb]
8	GO:0080022	0.04698	primary root development	biological_process	The process whose specific outcome is the progression of the primary root over time, from its formation to the mature structure. The primary root develops directly from the embryonic radicle. [GOC:dhl]
8	GO:0060255	0.049373	regulation of macromolecule metabolic process	biological_process	Any process that modulates the frequency, rate or extent of the chemical reactions and pathways involving macromolecules, any molecule of high relative molecular mass, the structure of which essentially comprises the multiple repetition of units derived, actually or conceptually, from molecules of low relative molecular mass. [GOC:dph, GOC:tb]
9	GO:0008283	4.61117e-12	cell proliferation	biological_process	The multiplication or reproduction of cells, resulting in the expansion of a cell population. [GOC:mah, GOC:mb]
9	GO:0051567	4.33682e-11	histone H3-K9 methylation	biological_process	The modification of histone H3 by addition of a methyl group to lysine at position 9 of the histone. [GOC:ai]
9	GO:0006270	4.62453e-09	DNA replication initiation	biological_process	The process in which DNA-dependent DNA replication is started; this involves the separation of a stretch of the DNA double helix, the recruitment of DNA polymerases and the initiation of polymerase action. [ISBN:071673706X, ISBN:0815316194]
9	GO:0000911	3.35372e-08	cytokinesis by cell plate formation	biological_process	The process of dividing the cytoplasm of a parent cell where a structure forms in the cytoplasm and grows until reaching the plasma membrane, thereby completely separating the cytoplasms of adjacent progeny cells. An example of this is found in Arabidopsis thaliana. [GOC:clt]
9	GO:0009909	1.08285e-07	regulation of flower development	biological_process	Any process that modulates the frequency, rate or extent of flower development. [GOC:go_curators]
9	GO:0006275	1.29934e-07	regulation of DNA replication	biological_process	Any process that modulates the frequency, rate or extent of DNA replication. [GOC:go_curators]
9	GO:0006306	1.31212e-07	DNA methylation	biological_process	The covalent transfer of a methyl group to either N-6 of adenine or C-5 or N-4 of cytosine. [GOC:ems, ISBN:0198506732]
9	GO:0006346	7.95379e-06	methylation-dependent chromatin silencing	biological_process	Repression of transcription by methylation of DNA, leading to the formation of heterochromatin. [GOC:mah]
9	GO:0010075	1.38868e-05	regulation of meristem growth	biological_process	Any process involved in maintaining the size and shape of a meristem. [GOC:tb]
9	GO:0031048	2.41678e-05	chromatin silencing by small RNA	biological_process	Repression of transcription by conversion of large regions of DNA into heterochromatin, directed by small RNAs sharing sequence identity to the repressed region. [GOC:dph, GOC:mtg_lung, GOC:ns]
9	GO:0006268	0.000163885	DNA unwinding involved in replication	biological_process	The process in which interchain hydrogen bonds between two strands of DNA are broken or 'melted', generating unpaired template strands for DNA replication. [ISBN:071673706X, ISBN:0815316194]
9	GO:0048449	0.000261166	floral organ formation	biological_process	The process that gives rise to floral organs. This process pertains to the initial formation of a structure from unspecified parts. [GOC:jid, GOC:PO_curators, PO:0025395]
9	GO:0000226	0.000302442	microtubule cytoskeleton organization	biological_process	A process that is carried out at the cellular level which results in the assembly, arrangement of constituent parts, or disassembly of cytoskeletal structures comprising microtubules and their associated proteins. [GOC:mah]
9	GO:0010389	0.000367898	regulation of G2/M transition of mitotic cell cycle	biological_process	Any process that modulates the rate or extent of progression from G2 phase to M phase of the mitotic cell cycle. [GOC:mtg_cell_cycle, PMID:17329565]
9	GO:0010424	0.000422234	DNA methylation on cytosine within a CG sequence	biological_process	The covalent transfer of a methyl group to C-5 or N-4 of a cytosine located within a CG sequence in a DNA molecule. [GOC:dph, GOC:tb, PMID:17239600]
9	GO:0010051	0.00127396	xylem and phloem pattern formation	biological_process	The regionalization process that gives rise to the patterning of the conducting tissues. An example of this process is found in Arabidopsis thaliana. [GOC:mtg_sensu, GOC:tb]
9	GO:0016132	0.00177395	brassinosteroid biosynthetic process	biological_process	The chemical reactions and pathways resulting in the formation of brassinosteroids, any of a group of steroid derivatives that occur at very low concentrations in plant tissues and may have hormone-like effects. [ISBN:0192801023]
9	GO:0007067	0.0018164	mitosis	biological_process	A cell cycle process comprising the steps by which the nucleus of a eukaryotic cell divides; the process involves condensation of chromosomal DNA into a highly compacted form. Canonically, mitosis produces two daughter nuclei whose chromosome complement is identical to that of the mother cell. [GOC:dph, GOC:ma, GOC:mah, ISBN:0198547684]
9	GO:0048438	0.00196176	floral whorl development	biological_process	The process whose specific outcome is the progression of a floral whorl over time, from its formation to the mature structure. A floral whorl is a circular arrangement of parts of a flower arising from a stem of a plant. [GOC:dph, GOC:go_curators, GOC:PO_curators, GOC:tb, PO:0025023]
9	GO:0007169	0.00196877	transmembrane receptor protein tyrosine kinase signaling pathway	biological_process	A series of molecular signals initiated by the binding of an extracellular ligand to a receptor on the surface of the target cell where the receptor possesses tyrosine kinase activity, and ending with regulation of a downstream cellular process, e.g. transcription. [GOC:ceb, GOC:signaling]
9	GO:0051726	0.00229733	regulation of cell cycle	biological_process	Any process that modulates the rate or extent of progression through the cell cycle. [GOC:ai, GOC:dph, GOC:tb]
9	GO:0006323	0.00325359	DNA packaging	biological_process	Any process in which DNA and associated proteins are formed into a compact, orderly structure. [GOC:mah, ISBN:0815316194]
9	GO:0048439	0.00397156	flower morphogenesis	biological_process	The process in which the anatomical structures of the flower are generated and organized. [GOC:go_curators]
9	GO:0051445	0.00599813	regulation of meiotic cell cycle	biological_process	Any process that modulates the rate or extent of progression through the meiotic cell cycle. [GOC:ai, GOC:dph, GOC:tb]
9	GO:0000075	0.00828439	cell cycle checkpoint	biological_process	A cell cycle process that controls cell cycle progression by monitoring the integrity of specific cell cycle events. A cell cycle checkpoint begins with detection of deficiencies or defects and ends with signal transduction. [GOC:mtg_cell_cycle]
9	GO:0016572	0.00889299	histone phosphorylation	biological_process	The modification of histones by addition of phosphate groups. [GOC:ai]
9	GO:0007015	0.00933826	actin filament organization	biological_process	A process that is carried out at the cellular level which results in the assembly, arrangement of constituent parts, or disassembly of cytoskeletal structures comprising actin filaments. Includes processes that control the spatial distribution of actin filaments, such as organizing filaments into meshworks, bundles, or other structures, as by cross-linking. [GOC:mah]
9	GO:0033043	0.0103872	regulation of organelle organization	biological_process	Any process that modulates the frequency, rate or extent of a process involved in the formation, arrangement of constituent parts, or disassembly of an organelle. [GOC:mah]
9	GO:0031507	0.0108975	heterochromatin assembly	biological_process	The assembly of chromatin into heterochromatin, a compact and highly condensed form that is often, but not always, transcriptionally silent. [GOC:mah]
9	GO:0070828	0.0108975	heterochromatin organization	biological_process	Any process that results in the specification, formation or maintenance of the physical structure of eukaryotic heterochromatin, a compact and highly condensed form of chromatin. [GOC:mah]
9	GO:0010090	0.0113075	trichome morphogenesis	biological_process	The process in which the structures of a hair cell (trichome) cell are generated and organized. This process occurs while the initially relatively unspecialized epidermal cell is acquiring the specialized features of a hair cell. An example of this process is found in Arabidopsis thaliana. [GOC:mtg_sensu, GOC:tair_curators]
9	GO:0010015	0.0124684	root morphogenesis	biological_process	The process in which the anatomical structures of roots are generated and organized. The root is the usually underground part of a seed plant body that originates from the hypocotyl, functions as an organ of absorption, aeration, and food storage or as a means of anchorage and support. [GOC:sm, ISBN:0877797099]
9	GO:0010026	0.0151885	trichome differentiation	biological_process	The process in which a relatively unspecialized epidermal cell acquires the specialized features of a trichome cell. An example of this process is found in Arabidopsis thaliana. [GOC:mtg_sensu, PMID:9367433]
9	GO:0021700	0.0162234	developmental maturation	biological_process	A developmental process, independent of morphogenetic (shape) change, that is required for an anatomical structure, cell or cellular component to attain its fully functional state. [GO_REF:0000021, GOC:cls, GOC:dgh, GOC:dph, GOC:jid, GOC:mtg_15jun06]
9	GO:0045787	0.0205574	positive regulation of cell cycle	biological_process	Any process that activates or increases the rate or extent of progression through the cell cycle. [GOC:go_curators]
9	GO:0000070	0.0206268	mitotic sister chromatid segregation	biological_process	The cell cycle process in which replicated homologous chromosomes are organized and then physically separated and apportioned to two sets during the mitotic cell cycle. Each replicated chromosome, composed of two sister chromatids, aligns at the cell equator, paired with its homologous partner. One homolog of each morphologic type goes into each of the resulting chromosome sets. [GOC:ai]
9	GO:0000077	0.0206268	DNA damage checkpoint	biological_process	A cell cycle checkpoint that regulates progression through the cell cycle in response to DNA damage. A DNA damage checkpoint may blocks cell cycle progression (in G1, G2 or metaphase) or slow the rate at which S phase proceeds. [GOC:mtg_cell_cycle]
9	GO:0006182	0.0206268	cGMP biosynthetic process	biological_process	The chemical reactions and pathways resulting in the formation of cyclic GMP, guanosine 3',5'-phosphate. [ISBN:0198506732]
9	GO:0007076	0.0206268	mitotic chromosome condensation	biological_process	The cell cycle process in which chromatin structure is compacted prior to and during mitosis in eukaryotic cells. [GOC:mah, ISBN:0815316194]
9	GO:0018107	0.0206268	peptidyl-threonine phosphorylation	biological_process	The phosphorylation of peptidyl-threonine to form peptidyl-O-phospho-L-threonine. [RESID:AA0038]
9	GO:0018210	0.0206268	peptidyl-threonine modification	biological_process	The modification of peptidyl-threonine. [GOC:go_curators]
9	GO:0031055	0.0206268	chromatin remodeling at centromere	biological_process	Dynamic structural changes in centromeric DNA. [GOC:mah]
9	GO:0031508	0.0206268	centromeric heterochromatin assembly	biological_process	The assembly of chromatin into heterochromatin near the centromere. [GOC:mah]
9	GO:0031937	0.0206268	positive regulation of chromatin silencing	biological_process	Any process that activates or increases the frequency, rate or extent of chromatin silencing. [GOC:mah]
9	GO:0032411	0.0206268	positive regulation of transporter activity	biological_process	Any process that activates or increases the activity of a transporter. [GOC:mah]
9	GO:0032414	0.0206268	positive regulation of ion transmembrane transporter activity	biological_process	Any process that activates or increases the activity of an ion transporter. [GOC:mah, GOC:tb]
9	GO:0034508	0.0206268	centromere complex assembly	biological_process	The aggregation, arrangement and bonding together of proteins and centromeric DNA molecules to form a centromeric protein-DNA complex. Includes the formation of the chromatin structures which form a platform for the kinetochore, and assembly of the kinetochore onto this specialized chromatin. In fission yeast and higher eukaryotes this process also includes the formation of heterochromatin at the…
9	GO:0035405	0.0206268	histone-threonine phosphorylation	biological_process	The modification of histones by addition of a phosphate group to a threonine residue. [GOC:bf]
9	GO:0035407	0.0206268	histone H3-T11 phosphorylation	biological_process	The modification of histone H3 by the addition of an phosphate group to a threonine residue at position 11 of the histone. [GOC:bf]
9	GO:0046068	0.0206268	cGMP metabolic process	biological_process	The chemical reactions and pathways involving cyclic GMP, guanosine 3',5'-phosphate. [GOC:go_curators]
9	GO:0071277	0.0206268	cellular response to calcium ion	biological_process	Any process that results in a change in state or activity of a cell (in terms of movement, secretion, enzyme production, gene expression, etc.) as a result of a calcium ion stimulus. [GOC:mah]
9	GO:0071588	0.0206268	hydrogen peroxide mediated signaling pathway	biological_process	A series of molecular signals mediated by the detection of hydrogen peroxide (H2O2). [GOC:mah, PMID:17043891]
9	GO:0072355	0.0206268	histone H3-T3 phosphorylation	biological_process	The modification of histone H3 by the addition of an phosphate group to a threonine residue at position 3 of the histone. [GOC:mah]
9	GO:0090308	0.0206268	regulation of methylation-dependent chromatin silencing	biological_process	Any process that modulates the rate, frequency, or extent of the repression of transcription by methylation of DNA, leading to the formation of heterochromatin. [GOC:BHF]
9	GO:0090309	0.0206268	positive regulation of methylation-dependent chromatin silencing	biological_process	Any process that increases the rate, frequency, or extent of the repression of transcription by methylation of DNA, leading to the formation of heterochromatin. [GOC:BHF]
9	GO:1901527	0.0206268	abscisic acid mediated signaling pathway involved in stomatal movement	biological_process	Any abscisic acid mediated signaling pathway that is involved in stomatal movement. [GOC:TermGenie, PMID:22730405]
9	GO:1901528	0.0206268	hydrogen peroxide mediated signaling pathway involved in stomatal movement	biological_process	Any hydrogen peroxide mediated signaling pathway that is involved in stomatal movement. [GOC:TermGenie]
9	GO:1901529	0.0206268	positive regulation of anion channel activity	biological_process	Any process that activates or increases the frequency, rate or extent of anion channel activity. [GOC:TermGenie]
9	GO:0006310	0.0230975	DNA recombination	biological_process	Any process in which a new genotype is formed by reassortment of genes resulting in gene combinations different from those that were present in the parents. In eukaryotes genetic recombination can occur by chromosome assortment, intrachromosomal recombination, or nonreciprocal interchromosomal recombination. Intrachromosomal recombination occurs by crossing over. In bacteria it may occur by genet…
9	GO:0016246	0.0230975	RNA interference	biological_process	The process in which double-stranded RNAs silence cognate genes. Involves posttranscriptional gene inactivation ('silencing') both of transgenes or dsRNA introduced into a germline, and of the host gene(s) homologous to the transgenes or dsRNA. This silencing is triggered by the introduction of transgenes or double-stranded RNA (dsRNA), and can occur through a specific decrease in the level of mR…
9	GO:0043473	0.0246976	pigmentation	biological_process	The deposition or aggregation of coloring matter in an organism, tissue or cell. [GOC:jl]
9	GO:0043476	0.0246976	pigment accumulation	biological_process	The aggregation of coloring matter in a particular location in an organism, tissue or cell, occurring in response to some external stimulus. [GOC:jl]
9	GO:0043478	0.0246976	pigment accumulation in response to UV light	biological_process	The aggregation of coloring matter in a particular location in an organism, tissue or cell, occurring in response to a UV light stimulus. [GOC:jl]
9	GO:0043479	0.0246976	pigment accumulation in tissues in response to UV light	biological_process	The aggregation of coloring matter in a particular location in a tissue, occurring in response to a UV light stimulus. [GOC:jl]
9	GO:0043480	0.0246976	pigment accumulation in tissues	biological_process	The aggregation of coloring matter in a particular location in a tissue, occurring in response to an external stimulus. [GOC:jl]
9	GO:0043481	0.0246976	anthocyanin accumulation in tissues in response to UV light	biological_process	The aggregation of the pigment anthocyanin in a particular location in a tissue, occurring in response to a UV light stimulus. [GOC:jl]
9	GO:0006333	0.0253033	chromatin assembly or disassembly	biological_process	The formation or destruction of chromatin structures. [GOC:mah]
9	GO:0007051	0.0253033	spindle organization	biological_process	A process that is carried out at the cellular level which results in the assembly, arrangement of constituent parts, or disassembly of the spindle, the array of microtubules and associated molecules that forms between opposite poles of a eukaryotic cell during DNA segregation and serves to move the duplicated chromosomes apart. [GOC:mah]
9	GO:0048447	0.0253033	sepal morphogenesis	biological_process	The process in which the anatomical structures of the sepal are generated and organized. [GOC:go_curators]
9	GO:0048451	0.0253033	petal formation	biological_process	The process that gives rise to the petal. This process pertains to the initial formation of a structure from unspecified parts. [GOC:jid]
9	GO:0048453	0.0253033	sepal formation	biological_process	The process that gives rise to the sepal. This process pertains to the initial formation of a structure from unspecified parts. [GOC:jid]
9	GO:0051225	0.0253033	spindle assembly	biological_process	The aggregation, arrangement and bonding together of a set of components to form the spindle, the array of microtubules and associated molecules that serves to move duplicated chromosomes apart. [GOC:ai, GOC:expert_rg, GOC:mtg_sensu, GOC:tb]
9	GO:0009913	0.0261026	epidermal cell differentiation	biological_process	The process in which a relatively unspecialized cell acquires specialized features of an epidermal cell, any of the cells making up the epidermis. [GOC:dph, GOC:go_curators, GOC:mtg_sensu, GOC:sdb_2009, GOC:tb]
9	GO:0030855	0.0261026	epithelial cell differentiation	biological_process	The process in which a relatively unspecialized cell acquires specialized features of an epithelial cell, any of the cells making up an epithelium. [GOC:ecd, PMID:11839751]
9	GO:0060429	0.0261026	epithelium development	biological_process	The process whose specific outcome is the progression of an epithelium over time, from its formation to the mature structure. An epithelium is a tissue that covers the internal or external surfaces of an anatomical structure. [GOC:dph, GOC:mtg_lung]
9	GO:0008544	0.0269011	epidermis development	biological_process	The process whose specific outcome is the progression of the epidermis over time, from its formation to the mature structure. The epidermis is the outer epithelial layer of a plant or animal, it may be a single layer that produces an extracellular material (e.g. the cuticle of arthropods) or a complex stratified squamous epithelium, as in the case of many vertebrate species. [GOC:go_curators, UBE…
9	GO:0048446	0.0275101	petal morphogenesis	biological_process	The process in which the anatomical structures of the petal are generated and organized. [GOC:go_curators]
9	GO:0009799	0.027801	specification of symmetry	biological_process	The establishment of an organism's body plan or part of an organism such that a similar arrangement in form and relationship of parts around a common axis, or around each side of a plane is created. [GOC:go_curators]
9	GO:0009855	0.027801	determination of bilateral symmetry	biological_process	The establishment of an organism's body plan or part of an organism with respect to a single longitudinal plane. The pattern can either be symmetric, such that the halves are mirror images, or asymmetric where the pattern deviates from this symmetry. [GOC:go_curators]
9	GO:0009292	0.0283818	genetic transfer	biological_process	In the absence of a sexual life cycle, the process involved in the introduction of genetic information to create a genetically different individual. [GOC:clt]
9	GO:0009294	0.0283818	DNA mediated transformation	biological_process	The introduction and uptake of foreign genetic material (DNA or RNA) into a cell, and often the expression of that genetic material. [ISBN:0716720094, Wikipedia:Transformation_(genetics)]
9	GO:0010311	0.0283818	lateral root formation	biological_process	The process that gives rise to a lateral root. This process pertains to the initial formation of a structure from unspecified parts. A lateral root primordium represents an organized group of cells derived from the root pericycle that will differentiate into a new root, as opposed to the initiation of the main root from the embryo proper. [GOC:tair_curators, PMID:17259263]
9	GO:0031497	0.0283818	chromatin assembly	biological_process	The assembly of DNA, histone proteins, other associated proteins, and sometimes RNA, into chromatin structure, beginning with the formation of the basic unit, the nucleosome, followed by organization of the nucleosomes into higher order structures, ultimately giving rise to a complex organization of specific domains within the nucleus. [http://www.infobiogen.fr/services/chromcancer/IntroItems/Chr…
9	GO:0051607	0.0294362	defense response to virus	biological_process	Reactions triggered in response to the presence of a virus that act to protect the cell or organism. [GOC:ai]
9	GO:0048442	0.0298163	sepal development	biological_process	The process whose specific outcome is the progression of the sepal over time, from its formation to the mature structure. [GOC:go_curators]
9	GO:0048464	0.0298163	flower calyx development	biological_process	The process whose specific outcome is the progression of the flower calyx over time, from its formation to the mature structure. [GOC:go_curators]
9	GO:0035194	0.0305154	posttranscriptional gene silencing by RNA	biological_process	Any process of posttranscriptional gene inactivation (silencing) mediated by small RNA molecules that may trigger mRNA degradation or negatively regulate translation. [GOC:mah, PMID:15020054, PMID:15066275, PMID:15066283]
9	GO:0009790	0.0316184	embryo development	biological_process	The process whose specific outcome is the progression of an embryo from its formation until the end of its embryonic life stage. The end of the embryonic stage is organism-specific. For example, for mammals, the process would begin with zygote formation and end with birth. For insects, the process would begin at zygote formation and end with larval hatching. For plant zygotic embryos, this would …
9	GO:0022622	0.0321999	root system development	biological_process	The process whose specific outcome is the progression of the root system over time, from its formation to the mature structure. [GOC:isa_complete]
9	GO:0048364	0.0321999	root development	biological_process	The process whose specific outcome is the progression of the root over time, from its formation to the mature structure. The root is the water- and mineral-absorbing part of a plant which is usually underground, does not bear leaves, tends to grow downwards and is typically derived from the radicle of the embryo. [GOC:jid, PO:0009005]
9	GO:0048527	0.0322215	lateral root development	biological_process	The process whose specific outcome is the progression of the lateral root over time, from its formation to the mature structure. A lateral root is one formed from pericycle cells located on the xylem radius of the root, as opposed to the initiation of the main root from the embryo proper. [GOC:tb]
9	GO:0070925	0.0322215	organelle assembly	biological_process	The aggregation, arrangement and bonding together of a set of components to form an organelle. An organelle is an organized structure of distinctive morphology and function. Includes the nucleus, mitochondria, plastids, vacuoles, vesicles, ribosomes and the cytoskeleton. Excludes the plasma membrane. [GOC:mah]
9	GO:0016444	0.0326717	somatic cell DNA recombination	biological_process	Recombination occurring within or between DNA molecules in somatic cells. [GOC:ma]
9	GO:0071396	0.0328004	cellular response to lipid	biological_process	Any process that results in a change in state or activity of a cell (in terms of movement, secretion, enzyme production, gene expression, etc.) as a result of a lipid stimulus. [GOC:mah]
9	GO:0097306	0.0333916	cellular response to alcohol	biological_process	Any process that results in a change in state or activity of a cell (in terms of movement, secretion, enzyme production, gene expression, etc.) as a result of an alcohol stimulus. [CHEBI:30879, GOC:pr]
9	GO:0010638	0.0346789	positive regulation of organelle organization	biological_process	Any process that increases the frequency, rate or extent of a process involved in the formation, arrangement of constituent parts, or disassembly of an organelle. [GOC:dph, GOC:tb]
9	GO:0071555	0.034867	cell wall organization	biological_process	A process that results in the assembly, arrangement of constituent parts, or disassembly of the cell wall, the rigid or semi-rigid envelope lying outside the cell membrane of plant, fungal and most prokaryotic cells, maintaining their shape and protecting them from osmotic lysis. [GOC:mah]
9	GO:0044272	0.0356448	sulfur compound biosynthetic process	biological_process	The chemical reactions and pathways resulting in the formation of compounds that contain sulfur, such as the amino acids methionine and cysteine or the tripeptide glutathione. [GOC:jl]
9	GO:0016441	0.0362081	posttranscriptional gene silencing	biological_process	The inactivation of gene expression by a posttranscriptional mechanism. [GOC:mah, PMID:15020054]
9	GO:0048469	0.0371224	cell maturation	biological_process	A developmental process, independent of morphogenetic (shape) change, that is required for a cell to attain its fully functional state. [GOC:go_curators]
9	GO:0048764	0.0371224	trichoblast maturation	biological_process	A developmental process, independent of morphogenetic (shape) change, that is required for a trichoblast cell to attain its fully functional state. [GOC:jid]
9	GO:0048765	0.0371224	root hair cell differentiation	biological_process	The process in which a relatively unspecialized cell acquires specialized features of a root hair cell. [GOC:jid]
9	GO:0007000	0.0371976	nucleolus organization	biological_process	A process that is carried out at the cellular level which results in the assembly, arrangement of constituent parts, or disassembly of the nucleolus. [GOC:dph, GOC:jid, GOC:jl, GOC:mah]
9	GO:0051130	0.0384568	positive regulation of cellular component organization	biological_process	Any process that activates or increases the frequency, rate or extent of a process involved in the formation, arrangement of constituent parts, or disassembly of cell structures, including the plasma membrane and any external encapsulating structures such as the cell wall and cell envelope. [GOC:ai]
9	GO:0006974	0.0392845	response to DNA damage stimulus	biological_process	Any process that results in a change in state or activity of a cell (in terms of movement, secretion, enzyme production, gene expression, etc.) as a result of a stimulus indicating damage to its DNA from environmental insults or errors during metabolism. [GOC:go_curators]
9	GO:0009738	0.0392845	abscisic acid mediated signaling pathway	biological_process	A series of molecular signals mediated by the detection of abscisic acid. [GOC:sm]
9	GO:0010054	0.0397527	trichoblast differentiation	biological_process	The process in which a relatively unspecialized cell acquires the specialized features of a trichoblast, a root epidermal cell that will give rise to a root hair. [GOC:tb]
9	GO:0048441	0.040026	petal development	biological_process	The process whose specific outcome is the progression of the petal over time, from its formation to the mature structure. [GOC:go_curators]
9	GO:0048465	0.040026	corolla development	biological_process	The process whose specific outcome is the progression of the corolla over time, from its formation to the mature structure. [GOC:go_curators]
9	GO:0000819	0.0408314	sister chromatid segregation	biological_process	The cell cycle process in which sister chromatids are organized and then physically separated and apportioned to two or more sets. [GOC:ai, GOC:elh]
9	GO:0010069	0.0408314	zygote asymmetric cytokinesis in embryo sac	biological_process	The division of the zygote in a plane perpendicular to the long axis of the embryo sac to produce a larger basal cell near the micropyle and a small terminal cell close to what was the central cell and is now the developing endosperm. An example of this process is found in Arabidopsis thaliana. [GOC:mtg_sensu, GOC:tb, ISBN:0865427429]
9	GO:0010070	0.0408314	zygote asymmetric cell division	biological_process	The division of the zygote into two daughter cells that will adopt developmentally distinct potentials. [GOC:tb]
9	GO:0010588	0.0408314	cotyledon vascular tissue pattern formation	biological_process	Vascular tissue pattern formation as it occurs in the cotyledon of vascular plants. [PMID:10559439]
9	GO:0015692	0.0408314	lead ion transport	biological_process	The directed movement of lead (Pb) ions into, out of or within a cell, or between cells, by means of some agent such as a transporter or pore. [GOC:ai]
9	GO:0030261	0.0408314	chromosome condensation	biological_process	The progressive compaction of dispersed interphase chromatin into threadlike chromosomes prior to mitotic or meiotic nuclear division, or during apoptosis, in eukaryotic cells. [GOC:mah, ISBN:0815316194]
9	GO:0051446	0.0408314	positive regulation of meiotic cell cycle	biological_process	Any process that activates or increases the frequency, rate or extent of progression through the meiotic cell cycle. [GOC:ai, GOC:dph, GOC:tb]
9	GO:0071421	0.0408314	manganese ion transmembrane transport	biological_process	A process in which a manganese ion is transported from one side of a membrane to the other by means of some agent such as a transporter or pore. [GOC:mah]
9	GO:0080060	0.0408314	integument development	biological_process	The process whose specific outcome is the progression of the integument over time, from its formation to the mature structure. Integument is one of the layers of tissue that usually covers the ovule, enveloping the nucellus and forming the micropyle at the apex. [PMID:19054366, PO:0020021]
9	GO:2000012	0.0408314	regulation of auxin polar transport	biological_process	Any process that modulates the frequency, rate or extent of auxin polar transport. [GOC:obol]
9	GO:2000379	0.0408314	positive regulation of reactive oxygen species metabolic process	biological_process	Any process that activates or increases the frequency, rate or extent of reactive oxygen species metabolic process. [GOC:mah]
9	GO:0045229	0.0409905	external encapsulating structure organization	biological_process	A process that is carried out at the cellular level which results in the assembly, arrangement of constituent parts, or disassembly of external structures that lie outside the plasma membrane and surround the entire cell. [GOC:ai, GOC:dph, GOC:jl, GOC:mah]
9	GO:0008356	0.041948	asymmetric cell division	biological_process	The asymmetric division of cells to produce two daughter cells with different developmental potentials. It is of fundamental significance for the generation of cell diversity. [PMID:11672519]
9	GO:0010101	0.041948	post-embryonic root morphogenesis	biological_process	The process in which the anatomical structures of the post-embryonic root are generated and organized. The post-embryonic root is the root formed after the embryonic phase has been completed. [GOC:tb]
9	GO:0010102	0.041948	lateral root morphogenesis	biological_process	The process in which the anatomical structures of a lateral root are generated and organized. A lateral root is one formed from pericycle cells located on the xylem radius of the root, as opposed to the initiation of the main root from the embryo proper. [GOC:tair_curators]
9	GO:0022607	0.0420807	cellular component assembly	biological_process	The aggregation, arrangement and bonding together of a cellular component. [GOC:isa_complete]
9	GO:0009310	0.0428214	amine catabolic process	biological_process	The chemical reactions and pathways resulting in the breakdown of any organic compound that is weakly basic in character and contains an amino or a substituted amino group. Amines are called primary, secondary, or tertiary according to whether one, two, or three carbon atoms are attached to the nitrogen atom. [GOC:jl, ISBN:0198506732]
9	GO:0042402	0.0428214	cellular biogenic amine catabolic process	biological_process	The chemical reactions and pathways occurring at the level of individual cells resulting in the breakdown of biogenic amines, any of a group of naturally occurring, biologically active amines, such as norepinephrine, histamine, and serotonin, many of which act as neurotransmitters. [GOC:go_curators, GOC:jl, ISBN:0198506732]
9	GO:0051128	0.0439162	regulation of cellular component organization	biological_process	Any process that modulates the frequency, rate or extent of a process involved in the formation, arrangement of constituent parts, or disassembly of cell structures, including the plasma membrane and any external encapsulating structures such as the cell wall and cell envelope. [GOC:ai]
9	GO:0000902	0.0443084	cell morphogenesis	biological_process	The developmental process in which the size or shape of a cell is generated and organized. [GOC:clt, GOC:dph, GOC:go_curators, GOC:tb]
9	GO:0048440	0.0445498	carpel development	biological_process	The process whose specific outcome is the progression of the carpel over time, from its formation to the mature structure. A carpel is an organ (generally believed to be a modified foliar unit) at the centre of a flower, bearing one or more ovules and having its margins fused together or with other carpels to enclose the ovule in an ovary, and consisting also of a stigma and usually a style. [GOC…
9	GO:0010053	0.0453627	root epidermal cell differentiation	biological_process	The process in which a relatively unspecialized cell in the root epidermis acquires the specialized features of a trichoblast or atrichoblast. [GOC:tb]
9	GO:0006338	0.046912	chromatin remodeling	biological_process	Dynamic structural changes to eukaryotic chromatin occurring throughout the cell division cycle. These changes range from the local changes necessary for transcriptional regulation to global changes necessary for chromosome segregation. [GOC:jid, PMID:12697820]
9	GO:0009615	0.0488958	response to virus	biological_process	Any process that results in a change in state or activity of a cell or an organism (in terms of movement, secretion, enzyme production, gene expression, etc.) as a result of a stimulus from a virus. [GOC:hb]
9	GO:0010162	0.0488958	seed dormancy process	biological_process	A dormancy process in which dormancy (sometimes called a dormant state) is induced, maintained or broken in a seed. Seed dormancy is a suspension of most physiological activity and growth in a seed, including the embryo contained therein, that can be reactivated. It often requires special conditions for reactivation, such as specific temperature, scarification, or leaching of inhibitors. [GOC:lr,…
9	GO:0022611	0.0488958	dormancy process	biological_process	A developmental process in which dormancy (sometimes called a dormant state) is induced, maintained or broken. Dormancy is a suspension of most physiological activity and growth that can be reactivated. [GOC:isa_complete, GOC:PO_curators, PO_REF:00009]
10	GO:0031062	0.00119227	positive regulation of histone methylation	biological_process	Any process that activates or increases the frequency, rate or extent of the covalent addition of methyl groups to histones. [GOC:mah]
10	GO:0051567	0.00141816	histone H3-K9 methylation	biological_process	The modification of histone H3 by addition of a methyl group to lysine at position 9 of the histone. [GOC:ai]
10	GO:0006346	0.00216944	methylation-dependent chromatin silencing	biological_process	Repression of transcription by methylation of DNA, leading to the formation of heterochromatin. [GOC:mah]
10	GO:0009944	0.00324336	polarity specification of adaxial/abaxial axis	biological_process	The process resulting in the establishment of polarity along the adaxial/abaxial axis. Adaxial refers to being situated toward an axis of an anatomical structure. Abaxial refers to being situated away from an axis of an anatomical structure. [GOC:dph, GOC:tb]
10	GO:0006306	0.00480737	DNA methylation	biological_process	The covalent transfer of a methyl group to either N-6 of adenine or C-5 or N-4 of cytosine. [GOC:ems, ISBN:0198506732]
10	GO:0009855	0.00515112	determination of bilateral symmetry	biological_process	The establishment of an organism's body plan or part of an organism with respect to a single longitudinal plane. The pattern can either be symmetric, such that the halves are mirror images, or asymmetric where the pattern deviates from this symmetry. [GOC:go_curators]
10	GO:0048767	0.00561482	root hair elongation	biological_process	The process in which the root hair grows longer. [GOC:jid, PMID:12468740]
10	GO:0031048	0.00643595	chromatin silencing by small RNA	biological_process	Repression of transcription by conversion of large regions of DNA into heterochromatin, directed by small RNAs sharing sequence identity to the repressed region. [GOC:dph, GOC:mtg_lung, GOC:ns]
10	GO:0010073	0.00704767	meristem maintenance	biological_process	Any process involved in maintaining the identity, size and shape of a meristem. [GOC:tb]
10	GO:0009933	0.00718452	meristem structural organization	biological_process	Organization of a region of tissue in a plant that is composed of one or more undifferentiated cells capable of undergoing mitosis and differentiation, thereby effecting growth and development of a plant by giving rise to more meristem or specialized tissue. [GOC:sm, ISBN:0198547684]
10	GO:0048575	0.00791481	short-day photoperiodism, flowering	biological_process	A change from vegetative to reproductive phase as a result of detection of, or exposure to, a period of light that falls short of the critical day length. The critical day length varies between species. Although the term is short-day is used, most species actually respond to the duration of the night, so that the response will occur when a period of darkness exceeds the number of hours defined by…
10	GO:0051049	0.00980283	regulation of transport	biological_process	Any process that modulates the frequency, rate or extent of the directed movement of substances (such as macromolecules, small molecules, ions) into, out of or within a cell, or between cells, by means of some agent such as a transporter or pore. [GOC:ai]
10	GO:0009124	0.0104146	nucleoside monophosphate biosynthetic process	biological_process	The chemical reactions and pathways resulting in the formation of a nucleoside monophosphate, a compound consisting of a nucleobase linked to a deoxyribose or ribose sugar esterified with phosphate on the sugar. [GOC:go_curators, ISBN:0198506732]
10	GO:0010639	0.0104146	negative regulation of organelle organization	biological_process	Any process that decreases the frequency, rate or extent of a process involved in the formation, arrangement of constituent parts, or disassembly of an organelle. [GOC:dph, GOC:tb]
10	GO:0051129	0.0104146	negative regulation of cellular component organization	biological_process	Any process that stops, prevents, or reduces the frequency, rate or extent of a process involved in the formation, arrangement of constituent parts, or disassembly of cell structures, including the plasma membrane and any external encapsulating structures such as the cell wall and cell envelope. [GOC:ai]
10	GO:0071555	0.0112492	cell wall organization	biological_process	A process that results in the assembly, arrangement of constituent parts, or disassembly of the cell wall, the rigid or semi-rigid envelope lying outside the cell membrane of plant, fungal and most prokaryotic cells, maintaining their shape and protecting them from osmotic lysis. [GOC:mah]
10	GO:0071554	0.0116033	cell wall organization or biogenesis	biological_process	A process that results in the biosynthesis of constituent macromolecules, assembly, arrangement of constituent parts, or disassembly of a cell wall. [GOC:mah]
10	GO:0009698	0.0130636	phenylpropanoid metabolic process	biological_process	The chemical reactions and pathways involving aromatic derivatives of trans-cinnamic acid. [GOC:jl]
10	GO:0009123	0.0132149	nucleoside monophosphate metabolic process	biological_process	The chemical reactions and pathways involving a nucleoside monophosphate, a compound consisting of a nucleobase linked to a deoxyribose or ribose sugar esterified with phosphate on the sugar. [GOC:go_curators, ISBN:0198506732]
10	GO:0045229	0.0136896	external encapsulating structure organization	biological_process	A process that is carried out at the cellular level which results in the assembly, arrangement of constituent parts, or disassembly of external structures that lie outside the plasma membrane and surround the entire cell. [GOC:ai, GOC:dph, GOC:jl, GOC:mah]
10	GO:0009804	0.014804	coumarin metabolic process	biological_process	The chemical reactions and pathways involving coumarins, compounds derived from the phenylacrylic skeleton of cinnamic acids. [GOC:lr, GOC:yl]
10	GO:0009805	0.014804	coumarin biosynthetic process	biological_process	The chemical reactions and pathways resulting in the formation of coumarins, a class of compounds derived from the phenylacrylic skeleton of cinnamic acids. [GOC:lr, GOC:yl]
10	GO:0010014	0.0163201	meristem initiation	biological_process	Initiation of a region of tissue in a plant that is composed of one or more undifferentiated cells capable of undergoing mitosis and differentiation, thereby effecting growth and development of a plant by giving rise to more meristem or specialized tissue. [GOC:sm]
10	GO:0048609	0.0181312	multicellular organismal reproductive process	biological_process	The process, occurring above the cellular level, that is pertinent to the reproductive function of a multicellular organism. This includes the integrated processes at the level of tissues and organs. [GOC:dph, GOC:jid, GOC:tb]
10	GO:0010431	0.0181346	seed maturation	biological_process	A process in seed development that occurs after embryogenesis by which a quiescent state is established in a seed. Seed maturation is characterized by storage compound accumulation, acquisition of desiccation tolerance, growth arrest and the entry into a dormancy period of variable length that is broken upon germination. [PMID:16096971]
10	GO:0048366	0.018466	leaf development	biological_process	The process whose specific outcome is the progression of the leaf over time, from its formation to the mature structure. [GOC:go_curators]
10	GO:0010359	0.0196652	regulation of anion channel activity	biological_process	Any process that modulates the frequency, rate or extent of anion channel activity. [PMID:17319842]
10	GO:0006059	0.0201471	hexitol metabolic process	biological_process	The chemical reactions and pathways involving hexitols, any alditol with a chain of six carbon atoms in the molecule. [ISBN:0198506732]
10	GO:0006106	0.0201471	fumarate metabolic process	biological_process	The chemical reactions and pathways involving fumarate, the anion of trans-1,2-ethenedicarboxylic acid, the diastereoisomer of maleate. It is a key intermediate in metabolism and is formed in the TCA cycle from succinate and converted into malate. [ISBN:0198506732]
10	GO:0007135	0.0201471	meiosis II	biological_process	A cell cycle process comprising the steps by which a cell progresses through the second phase of meiosis, in which cells divide and separate the two chromatids in each chromosome. [GOC:dph, GOC:mah, ISBN:0198547684]
10	GO:0007142	0.0201471	male meiosis II	biological_process	A cell cycle process comprising the steps by which a cell progresses through male meiosis II, the second meiotic division in the male germline. [GOC:dph, GOC:mah]
10	GO:0010068	0.0201471	protoderm histogenesis	biological_process	The formation of the primary meristem or meristematic tissue that gives rise to the epidermis. [GOC:tb, ISBN:0471245208]
10	GO:0010248	0.0201471	establishment or maintenance of transmembrane electrochemical gradient	biological_process	The directed movement of ions to establish or maintain an electrochemical gradient across a membrane by means of some agent such as a transporter or pore. [GOC:mah, GOC:sm]
10	GO:0016075	0.0201471	rRNA catabolic process	biological_process	The chemical reactions and pathways resulting in the breakdown of rRNA, ribosomal RNA, a structural constituent of ribosomes. [GOC:ai]
10	GO:0019322	0.0201471	pentose biosynthetic process	biological_process	The chemical reactions and pathways resulting in the formation of a pentose, any monosaccharide with a chain of five carbon atoms in the molecule. [ISBN:0198506732]
10	GO:0019401	0.0201471	alditol biosynthetic process	biological_process	The chemical reactions and pathways resulting in the formation of alditols, any polyhydric alcohol derived from the acyclic form of a monosaccharide by reduction of its aldehyde or keto group to an alcoholic group. [ISBN:0198506732]
10	GO:0019406	0.0201471	hexitol biosynthetic process	biological_process	The chemical reactions and pathways resulting in the formation of hexitols, any alditol with a chain of six carbon atoms in the molecule. [ISBN:0198506732]
10	GO:0019567	0.0201471	arabinose biosynthetic process	biological_process	The chemical reactions and pathways resulting in the formation of arabinose, arabino-pentose. [GOC:ai]
10	GO:0019593	0.0201471	mannitol biosynthetic process	biological_process	The chemical reactions and pathways resulting in the formation of mannitol, the alditol derived from D-mannose by reduction of the aldehyde group. [ISBN:0198506732]
10	GO:0019594	0.0201471	mannitol metabolic process	biological_process	The chemical reactions and pathways involving mannitol, the alditol derived from D-mannose by reduction of the aldehyde group. [ISBN:0198506732]
10	GO:0031055	0.0201471	chromatin remodeling at centromere	biological_process	Dynamic structural changes in centromeric DNA. [GOC:mah]
10	GO:0031057	0.0201471	negative regulation of histone modification	biological_process	Any process that stops, prevents, or reduces the frequency, rate or extent of the covalent alteration of a histone. [GOC:mah]
10	GO:0031508	0.0201471	centromeric heterochromatin assembly	biological_process	The assembly of chromatin into heterochromatin near the centromere. [GOC:mah]
10	GO:0031937	0.0201471	positive regulation of chromatin silencing	biological_process	Any process that activates or increases the frequency, rate or extent of chromatin silencing. [GOC:mah]
10	GO:0032196	0.0201471	transposition	biological_process	Any process involved in mediating the movement of discrete segments of DNA between nonhomologous sites. [GOC:jp, ISBN:1555812090]
10	GO:0032197	0.0201471	transposition, RNA-mediated	biological_process	Any process involved in a type of transpositional recombination which occurs via an RNA intermediate. [GOC:jp, ISBN:1555812090]
10	GO:0034508	0.0201471	centromere complex assembly	biological_process	The aggregation, arrangement and bonding together of proteins and centromeric DNA molecules to form a centromeric protein-DNA complex. Includes the formation of the chromatin structures which form a platform for the kinetochore, and assembly of the kinetochore onto this specialized chromatin. In fission yeast and higher eukaryotes this process also includes the formation of heterochromatin at the…
10	GO:0035065	0.0201471	regulation of histone acetylation	biological_process	Any process that modulates the frequency, rate or extent of the addition of an acetyl group to a histone protein. [GOC:bf]
10	GO:0035067	0.0201471	negative regulation of histone acetylation	biological_process	Any process that stops, prevents, or reduces the frequency, rate or extent of the addition of an acetyl group to a histone protein. [GOC:bf]
10	GO:0042178	0.0201471	xenobiotic catabolic process	biological_process	The chemical reactions and pathways resulting in the breakdown of a xenobiotic compound, a compound foreign to living organisms. Used of chemical compounds, e.g. a xenobiotic chemical, such as a pesticide. [GOC:jl]
10	GO:0048498	0.0201471	establishment of petal orientation	biological_process	The process that determines the orientation of petals with reference to the central axis. [GOC:tb, PMID:10572040]
10	GO:0048559	0.0201471	establishment of floral organ orientation	biological_process	The process that determines the orientation of the floral organs with reference to the central axis of the flower. [GOC:jid]
10	GO:0048560	0.0201471	establishment of anatomical structure orientation	biological_process	The process that determines the orientation of an anatomical structure with reference to an axis. [GOC:jid]
10	GO:0048561	0.0201471	establishment of organ orientation	biological_process	The process that determines the orientation of an organ or tissue with reference to an axis. [GOC:jid]
10	GO:0051016	0.0201471	barbed-end actin filament capping	biological_process	The binding of a protein or protein complex to the barbed (or plus) end of an actin filament, thus preventing the addition, exchange or removal of further actin subunits. [ISBN:071673706X]
10	GO:0051569	0.0201471	regulation of histone H3-K4 methylation	biological_process	Any process that modulates the frequency, rate or extent of the covalent addition of a methyl group to the lysine at position 4 of histone H3. [GOC:ai]
10	GO:0051571	0.0201471	positive regulation of histone H3-K4 methylation	biological_process	Any process that activates or increases the frequency, rate or extent of the covalent addition of a methyl group to the lysine at position 4 of histone H3. [GOC:mah]
10	GO:0061085	0.0201471	regulation of histone H3-K27 methylation	biological_process	Any process that modulates the rate, frequency, or extent of histone H3-K27 methylation. Histone H3-K27 methylation is the modification of histone H3 by addition of a methyl group to lysine at position 27 of the histone. [GOC:dph, GOC:tb]
10	GO:0061087	0.0201471	positive regulation of histone H3-K27 methylation	biological_process	Any process that increases the rate, frequency, or extent of histone H3-K27 methylation. Histone H3-K27 methylation is the modification of histone H3 by addition of a methyl group to lysine at position 27 of the histone. [GOC:dph, GOC:tb]
10	GO:0090239	0.0201471	regulation of histone H4 acetylation	biological_process	Any process that modulates the rate, frequency, or extent of histone H4 acetylation, the modification of histone H4 by the addition of an acetyl group. [GOC:dph, GOC:tb]
10	GO:0090241	0.0201471	negative regulation of histone H4 acetylation	biological_process	Any process that decreases the rate, frequency, or extent of histone H4 acetylation, the modification of histone H4 by the addition of an acetyl group. [GOC:dph, GOC:tb]
10	GO:0090308	0.0201471	regulation of methylation-dependent chromatin silencing	biological_process	Any process that modulates the rate, frequency, or extent of the repression of transcription by methylation of DNA, leading to the formation of heterochromatin. [GOC:BHF]
10	GO:0090309	0.0201471	positive regulation of methylation-dependent chromatin silencing	biological_process	Any process that increases the rate, frequency, or extent of the repression of transcription by methylation of DNA, leading to the formation of heterochromatin. [GOC:BHF]
10	GO:0090428	0.0201471	perianth development	biological_process	The process whose specific outcome is the progression of the perianth over time, from its formation to the mature structure. The perianth is a collective phyllome structure composed of two or more petals, sepals, or tepals. [GOC:tb, PO:0009058]
10	GO:1901983	0.0201471	regulation of protein acetylation	biological_process	Any process that modulates the frequency, rate or extent of protein acetylation. [GOC:TermGenie, PMID:22117195]
10	GO:1901984	0.0201471	negative regulation of protein acetylation	biological_process	Any process that stops, prevents or reduces the frequency, rate or extent of protein acetylation. [GOC:TermGenie, PMID:22117195]
10	GO:2000756	0.0201471	regulation of peptidyl-lysine acetylation	biological_process	Any process that modulates the frequency, rate or extent of peptidyl-lysine acetylation. [GOC:obol]
10	GO:2000757	0.0201471	negative regulation of peptidyl-lysine acetylation	biological_process	Any process that stops, prevents or reduces the frequency, rate or extent of peptidyl-lysine acetylation. [GOC:obol]
10	GO:2001251	0.0201471	negative regulation of chromosome organization	biological_process	Any process that stops, prevents or reduces the frequency, rate or extent of chromosome organization. [GOC:obol]
10	GO:0032504	0.0202272	multicellular organism reproduction	biological_process	The biological process in which new individuals are produced by one or two multicellular organisms. The new individuals inherit some proportion of their genetic material from the parent or parents. [GOC:isa_complete, GOC:jid]
10	GO:0016246	0.0210988	RNA interference	biological_process	The process in which double-stranded RNAs silence cognate genes. Involves posttranscriptional gene inactivation ('silencing') both of transgenes or dsRNA introduced into a germline, and of the host gene(s) homologous to the transgenes or dsRNA. This silencing is triggered by the introduction of transgenes or double-stranded RNA (dsRNA), and can occur through a specific decrease in the level of mR…
10	GO:0010089	0.0218117	xylem development	biological_process	The formation of the principal water-conducting tissue of a vascular plant. [GOC:tb, ISBN:0471245208]
10	GO:0008283	0.0224874	cell proliferation	biological_process	The multiplication or reproduction of cells, resulting in the expansion of a cell population. [GOC:mah, GOC:mb]
10	GO:0009825	0.0228812	multidimensional cell growth	biological_process	The process in which a cell irreversibly increases in size in two or three [spatial] dimensions or along two or three axes. [ISBN:0943088399]
10	GO:0043269	0.0232411	regulation of ion transport	biological_process	Any process that modulates the frequency, rate or extent of the directed movement of charged atoms or small charged molecules into, out of or within a cell, or between cells, by means of some agent such as a transporter or pore. [GOC:jl]
10	GO:0044702	0.0232782	single organism reproductive process	biological_process	A biological process that directly contributes to the process of producing new individuals, involving a single organism. [GOC:jl]
10	GO:0009826	0.025766	unidimensional cell growth	biological_process	The process in which a cell irreversibly increases in size in one [spatial] dimension or along one axis, resulting in the morphogenesis of the cell. [ISBN:0943088399]
10	GO:0009740	0.0258858	gibberellic acid mediated signaling pathway	biological_process	A series of molecular signals mediated by the detection of gibberellic acid. [GOC:sm]
10	GO:0010476	0.0258858	gibberellin mediated signaling pathway	biological_process	The series of molecular signals generated as a consequence of gibberellin stimulus. [PMID:17521411]
10	GO:0048439	0.0258858	flower morphogenesis	biological_process	The process in which the anatomical structures of the flower are generated and organized. [GOC:go_curators]
10	GO:0048827	0.0267755	phyllome development	biological_process	The process whose specific outcome is the progression of a phyllome over time, from its formation to the mature structure. A phyllome is a collective term for all the different types of leaves appearing on plants. [GOC:devbiol, GOC:tb, PO:0006001]
10	GO:0022898	0.0271671	regulation of transmembrane transporter activity	biological_process	Any process that modulates the frequency, rate or extent of transmembrane transporter activity. [GOC:dph, GOC:mtg_cardio, GOC:mtg_transport]
10	GO:0032409	0.0271671	regulation of transporter activity	biological_process	Any process that modulates the activity of a transporter. [GOC:mah]
10	GO:0032412	0.0271671	regulation of ion transmembrane transporter activity	biological_process	Any process that modulates the activity of an ion transporter. [GOC:mah, GOC:tb]
10	GO:0040034	0.0271671	regulation of development, heterochronic	biological_process	Any process that modulates the consistent predetermined time point at which an integrated living unit or organism progresses from an initial condition to a later condition and the rate at which this time point is reached. [PMID:9442909]
10	GO:0035194	0.0279374	posttranscriptional gene silencing by RNA	biological_process	Any process of posttranscriptional gene inactivation (silencing) mediated by small RNA molecules that may trigger mRNA degradation or negatively regulate translation. [GOC:mah, PMID:15020054, PMID:15066275, PMID:15066283]
10	GO:0009963	0.0280655	positive regulation of flavonoid biosynthetic process	biological_process	Any process that activates or increases the frequency, rate or extent of the chemical reactions and pathways resulting in the formation of flavonoids. [GOC:tb]
10	GO:0071370	0.0280655	cellular response to gibberellin stimulus	biological_process	Any process that results in a change in state or activity of a cell (in terms of movement, secretion, enzyme production, gene expression, etc.) as a result of a gibberellin stimulus. [GOC:mah]
10	GO:0009556	0.0312832	microsporogenesis	biological_process	The process in which the microsporocyte undergoes meiosis, giving rise to four haploid microspores. [GOC:mtg_plant, GOC:tb]
10	GO:0048236	0.0312832	plant-type spore development	biological_process	The process whose specific outcome is the progression of the spore over time, from its formation to the mature structure. The spore gives rise to gametophytes. [GOC:jid, http://www.m-w.com]
10	GO:0033043	0.0318293	regulation of organelle organization	biological_process	Any process that modulates the frequency, rate or extent of a process involved in the formation, arrangement of constituent parts, or disassembly of an organelle. [GOC:mah]
10	GO:0016441	0.0331984	posttranscriptional gene silencing	biological_process	The inactivation of gene expression by a posttranscriptional mechanism. [GOC:mah, PMID:15020054]
10	GO:0048646	0.0345138	anatomical structure formation involved in morphogenesis	biological_process	The developmental process pertaining to the initial formation of an anatomical structure from unspecified parts. This process begins with the specific processes that contribute to the appearance of the discrete structure and ends when the structural rudiment is recognizable. An anatomical structure is any biological entity that occupies space and is distinguished from its surroundings. Anatomical…
10	GO:0009932	0.0346039	cell tip growth	biological_process	Growth that occurs specifically at the tip of a cell. [GOC:jid]
10	GO:0042335	0.0356278	cuticle development	biological_process	The chemical reactions and pathways resulting in the formation of a cuticle, the outer layer of some animals and plants, which acts to prevent water loss. [ISBN:0192800825]
10	GO:0010608	0.037304	posttranscriptional regulation of gene expression	biological_process	Any process that modulates the frequency, rate or extent of gene expression after the production of an RNA transcript. [GOC:dph, GOC:tb]
10	GO:0048441	0.0377272	petal development	biological_process	The process whose specific outcome is the progression of the petal over time, from its formation to the mature structure. [GOC:go_curators]
10	GO:0048465	0.0377272	corolla development	biological_process	The process whose specific outcome is the progression of the corolla over time, from its formation to the mature structure. [GOC:go_curators]
10	GO:0006260	0.03865	DNA replication	biological_process	The cellular metabolic process in which a cell duplicates one or more molecules of DNA. DNA replication begins when specific sequences, known as origins of replication, are recognized and bound by initiation proteins, and ends when the original DNA molecule has been completely duplicated and the copies topologically separated. The unit of replication usually corresponds to the genome of the cell,…
10	GO:0071897	0.03865	DNA biosynthetic process	biological_process	The cellular DNA metabolic process resulting in the formation of DNA, deoxyribonucleic acid, one of the two main types of nucleic acid, consisting of a long unbranched macromolecule formed from one or two strands of linked deoxyribonucleotides, the 3'-phosphate group of each constituent deoxyribonucleotide being joined in 3',5'-phosphodiester linkage to the 5'-hydroxyl group of the deoxyribose mo…
10	GO:0006072	0.0398915	glycerol-3-phosphate metabolic process	biological_process	The chemical reactions and pathways involving glycerol-3-phosphate, a phosphoric monoester of glycerol. [GOC:go_curators, ISBN:0198506732]
10	GO:0006166	0.0398915	purine ribonucleoside salvage	biological_process	Any process which produces a purine nucleoside from derivatives of it, without de novo synthesis. [GOC:jl]
10	GO:0006169	0.0398915	adenosine salvage	biological_process	Any process that generates adenosine, adenine riboside, from derivatives of it without de novo synthesis. [GOC:jl]
10	GO:0006344	0.0398915	maintenance of chromatin silencing	biological_process	The maintenance of chromatin in a transcriptionally silent state such as heterochromatin. [GOC:mah]
10	GO:0006805	0.0398915	xenobiotic metabolic process	biological_process	The chemical reactions and pathways involving a xenobiotic compound, a compound foreign to living organisms. Used of chemical compounds, e.g. a xenobiotic chemical, such as a pesticide. [GOC:cab2]
10	GO:0009157	0.0398915	deoxyribonucleoside monophosphate biosynthetic process	biological_process	The chemical reactions and pathways resulting in the formation of a deoxyribonucleoside monophosphate, a compound consisting of a nucleobase linked to a deoxyribose sugar esterified with phosphate on the sugar. [GOC:go_curators, ISBN:0198506732]
10	GO:0009162	0.0398915	deoxyribonucleoside monophosphate metabolic process	biological_process	The chemical reactions and pathways involving a deoxyribonucleoside monophosphate, a compound consisting of a nucleobase linked to a deoxyribose sugar esterified with phosphate on the sugar. [GOC:go_curators, ISBN:0198506732]
10	GO:0010424	0.0398915	DNA methylation on cytosine within a CG sequence	biological_process	The covalent transfer of a methyl group to C-5 or N-4 of a cytosine located within a CG sequence in a DNA molecule. [GOC:dph, GOC:tb, PMID:17239600]
10	GO:0010582	0.0398915	floral meristem determinacy	biological_process	The process in which a floral meristem becomes determinate (i.e. ceases to produce lateral organs and may or may not terminally differentiate). [PMID:18441215]
10	GO:0010599	0.0398915	production of lsiRNA involved in RNA interference	biological_process	Cleavage of double-stranded RNA to form lsiRNA (long small interfering RNA), a class of siRNAs 30 to 40 nt in length. lsiRNAs are induced by pathogen infection or under specific growth conditions. [PMID:18003861]
10	GO:0015712	0.0398915	hexose phosphate transport	biological_process	The directed movement of hexose phosphate into, out of or within a cell, or between cells, by means of some agent such as a transporter or pore. [GOC:krc]
10	GO:0015760	0.0398915	glucose-6-phosphate transport	biological_process	The directed movement of glucose-6-phosphate into, out of or within a cell, or between cells, by means of some agent such as a transporter or pore. Glucose-6-phosphate is a monophosphorylated derivative of glucose with the phosphate group attached to C-6. [GOC:ai]
10	GO:0019566	0.0398915	arabinose metabolic process	biological_process	The chemical reactions and pathways involving arabinose, arabino-pentose. L-Arabinose occurs both free, for example in the heartwood of many conifers, and in the combined state, as a constituent of plant hemicelluloses, bacterial polysaccharides etc. D-arabinose is a constituent of arabinonucleosides. [ISBN:0198506732]
10	GO:0042372	0.0398915	phylloquinone biosynthetic process	biological_process	The chemical reactions and pathways resulting in the formation of phylloquinone, vitamin K1, a quinone-derived compound synthesized by green plants. [GOC:jl, http://www.dentistry.leeds.ac.uk/biochem/thcme/vitamins.html#k]
10	GO:0042374	0.0398915	phylloquinone metabolic process	biological_process	The chemical reactions and pathways involving phylloquinone, a quinone-derived compound synthesized by green plants. Phylloquinone has vitamin K activity and is known as vitamin K1. [GOC:jl, http://www.dentistry.leeds.ac.uk/biochem/thcme/vitamins.html#k]
10	GO:0043174	0.0398915	nucleoside salvage	biological_process	Any process which produces a nucleotide, a nucleobase linked to either beta-D-ribofuranose (ribonucleoside) or 2-deoxy-beta-D-ribofuranose (a deoxyribonucleotide), from derivatives of it without de novo synthesis. [GOC:jl]
10	GO:0043967	0.0398915	histone H4 acetylation	biological_process	The modification of histone H4 by the addition of an acetyl group. [GOC:jl]
10	GO:0046086	0.0398915	adenosine biosynthetic process	biological_process	The chemical reactions and pathways resulting in the formation of adenosine, adenine riboside, a ribonucleoside found widely distributed in cells of every type as the free nucleoside and in combination in nucleic acids and various nucleoside coenzymes. [GOC:go_curators]
10	GO:0046621	0.0398915	negative regulation of organ growth	biological_process	Any process that stops, prevents, or reduces the frequency, rate or extent of growth of an organ of an organism. [GOC:bf, GOC:tb]
10	GO:0051574	0.0398915	positive regulation of histone H3-K9 methylation	biological_process	Any process that activates or increases the frequency, rate or extent of the covalent addition of a methyl group to the lysine at position 9 of histone H3. [GOC:ai]
10	GO:0052646	0.0398915	alditol phosphate metabolic process	biological_process	The chemical reactions and pathways involving alditol phosphates, any phosphorylated polyhydric alcohol derived from the acyclic form of a monosaccharide by reduction of its aldehyde or keto group to an alcoholic group. [CHEBI:22297, ISBN:0198506732]
10	GO:0071466	0.0398915	cellular response to xenobiotic stimulus	biological_process	Any process that results in a change in state or activity of a cell (in terms of movement, secretion, enzyme production, gene expression, etc.) as a result of a xenobiotic compound stimulus. Xenobiotic compounds are compounds foreign to living organisms. [GOC:mah]
10	GO:0044070	0.0401902	regulation of anion transport	biological_process	Any process that modulates the frequency, rate or extent of the directed movement of anions, atoms or small molecules with a net negative charge into, out of or within a cell, or between cells, by means of some agent such as a transporter or pore. [GOC:jl]
10	GO:0010087	0.0403757	phloem or xylem histogenesis	biological_process	The process whose specific outcome is the progression of phloem and/or xylem over time, from formation to the mature structure. An example of this process is found in Arabidopsis thaliana. [GOC:mtg_sensu, GOC:tb]
10	GO:0043090	0.0403757	amino acid import	biological_process	The directed movement of amino acids into a cell or organelle. [GOC:jl]
10	GO:0042545	0.0414367	cell wall modification	biological_process	The series of events leading to chemical and structural alterations of an existing cell wall that can result in loosening, increased extensibility or disassembly. [GOC:jl]
10	GO:0009965	0.0421819	leaf morphogenesis	biological_process	The process in which the anatomical structures of the leaf are generated and organized. [GOC:go_curators]
10	GO:0009749	0.043116	response to glucose stimulus	biological_process	Any process that results in a change in state or activity of a cell or an organism (in terms of movement, secretion, enzyme production, gene expression, etc.) as a result of a glucose stimulus. [GOC:jl]
10	GO:0009962	0.043116	regulation of flavonoid biosynthetic process	biological_process	Any process that modulates the frequency, rate or extent of the chemical reactions and pathways resulting in the formation of flavonoids. [GOC:tb]
10	GO:0046777	0.0434469	protein autophosphorylation	biological_process	The phosphorylation by a protein of one or more of its own amino acid residues, or residues on an identical protein. [ISBN:0198506732]
10	GO:0006468	0.0450903	protein phosphorylation	biological_process	The process of introducing a phosphate group on to a protein. [GOC:hb]
10	GO:0010162	0.0455113	seed dormancy process	biological_process	A dormancy process in which dormancy (sometimes called a dormant state) is induced, maintained or broken in a seed. Seed dormancy is a suspension of most physiological activity and growth in a seed, including the embryo contained therein, that can be reactivated. It often requires special conditions for reactivation, such as specific temperature, scarification, or leaching of inhibitors. [GOC:lr,…
10	GO:0022611	0.0455113	dormancy process	biological_process	A developmental process in which dormancy (sometimes called a dormant state) is induced, maintained or broken. Dormancy is a suspension of most physiological activity and growth that can be reactivated. [GOC:isa_complete, GOC:PO_curators, PO_REF:00009]
10	GO:0010051	0.0459473	xylem and phloem pattern formation	biological_process	The regionalization process that gives rise to the patterning of the conducting tissues. An example of this process is found in Arabidopsis thaliana. [GOC:mtg_sensu, GOC:tb]
10	GO:0016572	0.0459473	histone phosphorylation	biological_process	The modification of histones by addition of phosphate groups. [GOC:ai]
10	GO:0009664	0.0471748	plant-type cell wall organization	biological_process	A process that results in the assembly and arrangement of constituent parts of the cellulose and pectin-containing cell wall, or in the disassembly of the cellulose and pectin-containing cell wall. This process is carried out at the cellular level. An example of this process is found in Arabidopsis thaliana. [GOC:jid, GOC:mtg_sensu]
10	GO:0006598	0.0499272	polyamine catabolic process	biological_process	The chemical reactions and pathways resulting in the breakdown of polyamines, any organic compound containing two or more amino groups. [ISBN:0198506732]
10	GO:0042375	0.0499272	quinone cofactor metabolic process	biological_process	The chemical reactions and pathways involving quinone cofactors. [GOC:go_curators]
10	GO:0045426	0.0499272	quinone cofactor biosynthetic process	biological_process	The chemical reactions and pathways resulting in the formation of any quinone cofactor, such as menaquinone (vitamin K2), ubiquinone (coenzyme Q) or phylloquinone (vitamin K1). [GOC:mb]
10	GO:1901661	0.0499272	quinone metabolic process	biological_process	The chemical reactions and pathways involving quinone. [GOC:pr, GOC:TermGenie]
10	GO:1901663	0.0499272	quinone biosynthetic process	biological_process	The chemical reactions and pathways resulting in the formation of quinone. [GOC:pr, GOC:TermGenie]
11	GO:0006268	5.89407e-09	DNA unwinding involved in replication	biological_process	The process in which interchain hydrogen bonds between two strands of DNA are broken or 'melted', generating unpaired template strands for DNA replication. [ISBN:071673706X, ISBN:0815316194]
11	GO:0006275	8.0434e-09	regulation of DNA replication	biological_process	Any process that modulates the frequency, rate or extent of DNA replication. [GOC:go_curators]
11	GO:0006306	8.20538e-08	DNA methylation	biological_process	The covalent transfer of a methyl group to either N-6 of adenine or C-5 or N-4 of cytosine. [GOC:ems, ISBN:0198506732]
11	GO:0051567	1.25501e-07	histone H3-K9 methylation	biological_process	The modification of histone H3 by addition of a methyl group to lysine at position 9 of the histone. [GOC:ai]
11	GO:0008283	3.06789e-07	cell proliferation	biological_process	The multiplication or reproduction of cells, resulting in the expansion of a cell population. [GOC:mah, GOC:mb]
11	GO:0006270	7.75487e-05	DNA replication initiation	biological_process	The process in which DNA-dependent DNA replication is started; this involves the separation of a stretch of the DNA double helix, the recruitment of DNA polymerases and the initiation of polymerase action. [ISBN:071673706X, ISBN:0815316194]
11	GO:0006086	0.000258271	acetyl-CoA biosynthetic process from pyruvate	biological_process	The chemical reactions and pathways resulting in the formation of acetyl-CoA from pyruvate. [GOC:dph, GOC:go_curators, GOC:tb]
11	GO:0019288	0.000270932	isopentenyl diphosphate biosynthetic process, mevalonate-independent pathway	biological_process	The chemical reactions and pathways resulting in the formation of isopentenyl diphosphate by the mevalonate-independent pathway. Isopentenyl diphosphate (IPP) is the fundamental unit in isoprenoid biosynthesis and is biosynthesized from pyruvate and glyceraldehyde 3-phosphate via intermediates, including 1-deoxy-D-xylulose 5-phosphate. [GOC:go_curators, MetaCyc:NONMEVIPP-PWY]
11	GO:0006636	0.000417895	unsaturated fatty acid biosynthetic process	biological_process	The chemical reactions and pathways resulting in the formation of an unsaturated fatty acid, any fatty acid containing one or more double bonds between carbon atoms. [GOC:mah, MetaCyc:PWY-762, MetaCyc:PWY-782]
11	GO:0009106	0.000448165	lipoate metabolic process	biological_process	The chemical reactions and pathways involving lipoate, 1,2-dithiolane-3-pentanoate, the anion derived from lipoic acid. [GOC:ai, ISBN:0198506732]
11	GO:0010075	0.000580326	regulation of meristem growth	biological_process	Any process involved in maintaining the size and shape of a meristem. [GOC:tb]
11	GO:0006084	0.000806391	acetyl-CoA metabolic process	biological_process	The chemical reactions and pathways involving acetyl-CoA, a derivative of coenzyme A in which the sulfhydryl group is acetylated; it is a metabolite derived from several pathways (e.g. glycolysis, fatty acid oxidation, amino-acid catabolism) and is further metabolized by the tricarboxylic acid cycle. It is a key intermediate in lipid and terpenoid biosynthesis. [ISBN:0198547684]
11	GO:0006766	0.00089096	vitamin metabolic process	biological_process	The chemical reactions and pathways involving vitamins. Vitamin is a general term for a number of unrelated organic substances that occur in many foods in small amounts and that are necessary in trace amounts for the normal metabolic functioning of the body. Vitamins may be water-soluble or fat-soluble and usually serve as components of coenzyme systems. [GOC:ai]
11	GO:0010389	0.00089096	regulation of G2/M transition of mitotic cell cycle	biological_process	Any process that modulates the rate or extent of progression from G2 phase to M phase of the mitotic cell cycle. [GOC:mtg_cell_cycle, PMID:17329565]
11	GO:0006546	0.000974041	glycine catabolic process	biological_process	The chemical reactions and pathways resulting in the breakdown of glycine, aminoethanoic acid. [GOC:go_curators]
11	GO:0000280	0.00118449	nuclear division	biological_process	The division of a cell nucleus into two nuclei, with DNA and other nuclear contents distributed between the daughter nuclei. [GOC:mah]
11	GO:0042023	0.00129663	DNA endoreduplication	biological_process	Regulated re-replication of DNA within a single cell cycle, resulting in an increased cell ploidy. An example of this process occurs in the synthesis of Drosophila salivary gland cell polytene chromosomes. [GOC:jl]
11	GO:0046686	0.0016944	response to cadmium ion	biological_process	Any process that results in a change in state or activity of a cell or an organism (in terms of movement, secretion, enzyme production, gene expression, etc.) as a result of a cadmium (Cd) ion stimulus. [GOC:ai]
11	GO:0000911	0.00170986	cytokinesis by cell plate formation	biological_process	The process of dividing the cytoplasm of a parent cell where a structure forms in the cytoplasm and grows until reaching the plasma membrane, thereby completely separating the cytoplasms of adjacent progeny cells. An example of this is found in Arabidopsis thaliana. [GOC:clt]
11	GO:0019344	0.0018034	cysteine biosynthetic process	biological_process	The chemical reactions and pathways resulting in the formation of cysteine, 2-amino-3-mercaptopropanoic acid. [GOC:go_curators]
11	GO:0009909	0.0022016	regulation of flower development	biological_process	Any process that modulates the frequency, rate or extent of flower development. [GOC:go_curators]
11	GO:0019253	0.00250187	reductive pentose-phosphate cycle	biological_process	The fixation of carbon dioxide (CO2) as glucose in the chloroplasts of C3 plants; uses ATP and NADPH formed in the light reactions of photosynthesis; carbon dioxide reacts with ribulose 1,5-bisphosphate (catalyzed by the function of ribulose-bisphosphate carboxylase) to yield two molecules of 3-phosphoglycerate; these are then phosphorylated by ATP to 1,3-bisphosphateglyceraldehyde which, in turn…
11	GO:0042744	0.00374926	hydrogen peroxide catabolic process	biological_process	The chemical reactions and pathways resulting in the breakdown of hydrogen peroxide (H2O2). [GOC:jl]
11	GO:0009653	0.00426883	anatomical structure morphogenesis	biological_process	The process in which anatomical structures are generated and organized. Morphogenesis pertains to the creation of form. [GOC:go_curators, ISBN:0521436125]
11	GO:0006733	0.00446087	oxidoreduction coenzyme metabolic process	biological_process	The chemical reactions and pathways involving coenzymes that are required, in addition to an enzyme and a substrate, for an oxidoreductase reaction to proceed. [GOC:mah]
11	GO:0046165	0.00572701	alcohol biosynthetic process	biological_process	The chemical reactions and pathways resulting in the formation of alcohols, any of a class of compounds containing one or more hydroxyl groups attached to a saturated carbon atom. [CHEBI:30879, GOC:ai]
11	GO:0015995	0.00664155	chlorophyll biosynthetic process	biological_process	The chemical reactions and pathways resulting in the formation of chlorophyll, any compound of magnesium complexed in a porphyrin (tetrapyrrole) ring and which functions as a photosynthetic pigment, from less complex precursors. [GOC:jl]
11	GO:0019751	0.00671441	polyol metabolic process	biological_process	The chemical reactions and pathways involving a polyol, any alcohol containing three or more hydroxyl groups attached to saturated carbon atoms. [CHEBI:26191, GOC:go_curators]
11	GO:0051726	0.00841258	regulation of cell cycle	biological_process	Any process that modulates the rate or extent of progression through the cell cycle. [GOC:ai, GOC:dph, GOC:tb]
11	GO:0009142	0.00863442	nucleoside triphosphate biosynthetic process	biological_process	The chemical reactions and pathways resulting in the formation of a nucleoside triphosphate, a compound consisting of a nucleobase linked to a deoxyribose or ribose sugar esterified with triphosphate on the sugar. [GOC:go_curators, ISBN:0198506732]
11	GO:0009736	0.00902634	cytokinin mediated signaling pathway	biological_process	A series of molecular signals induced by the detection of cytokinin. [GOC:sm]
11	GO:0009773	0.00902634	photosynthetic electron transport in photosystem I	biological_process	A photosynthetic electron transport chain in which electrons move from the primary electron acceptor (Quinone, X) through a chain of electron transport molecules in the thylakoid membrane until they reach ferredoxin which passes the electron to the ultimate electron acceptor; NADP. [GOC:jid, ISBN:0716731363, ISBN:0816017360]
11	GO:0050790	0.00904547	regulation of catalytic activity	biological_process	Any process that modulates the activity of an enzyme. [GOC:ai]
11	GO:0016458	0.0091752	gene silencing	biological_process	Any transcriptional or post-transcriptional process carried out at the cellular level that results in long-term gene inactivation. [GOC:dph, GOC:jid, GOC:tb]
11	GO:0071555	0.0091752	cell wall organization	biological_process	A process that results in the assembly, arrangement of constituent parts, or disassembly of the cell wall, the rigid or semi-rigid envelope lying outside the cell membrane of plant, fungal and most prokaryotic cells, maintaining their shape and protecting them from osmotic lysis. [GOC:mah]
11	GO:1901659	0.0106854	glycosyl compound biosynthetic process	biological_process	The chemical reactions and pathways resulting in the formation of glycosyl compound. [GOC:pr, GOC:TermGenie]
11	GO:0009695	0.0109271	jasmonic acid biosynthetic process	biological_process	The chemical reactions and pathways resulting in the formation of jasmonic acid, a fatty acid derivative. [ISBN:0387969845]
11	GO:0006342	0.0126973	chromatin silencing	biological_process	Repression of transcription by altering the structure of chromatin, e.g. by conversion of large regions of DNA into an inaccessible state often called heterochromatin. [GOC:mah, PMID:10219245]
11	GO:0045814	0.0131894	negative regulation of gene expression, epigenetic	biological_process	Any epigenetic process that stops, prevents or reduces the rate of gene expression. [GOC:go_curators]
11	GO:0005976	0.0131962	polysaccharide metabolic process	biological_process	The chemical reactions and pathways involving a polysaccharide, a polymer of many (typically more than 10) monosaccharide residues linked glycosidically. [CHEBI:18154, ISBN:0198547684]
11	GO:0044262	0.0138285	cellular carbohydrate metabolic process	biological_process	The chemical reactions and pathways involving carbohydrates, any of a group of organic compounds based of the general formula Cx(H2O)y, as carried out by individual cells. [GOC:jl]
11	GO:0043085	0.0148105	positive regulation of catalytic activity	biological_process	Any process that activates or increases the activity of an enzyme. [GOC:jl, GOC:tb]
11	GO:0044093	0.0154759	positive regulation of molecular function	biological_process	Any process that activates or increases the rate or extent of a molecular function, an elemental biological activity occurring at the molecular level, such as catalysis or binding. [GO:jl]
11	GO:0009694	0.0156591	jasmonic acid metabolic process	biological_process	The chemical reactions and pathways involving jasmonic acid, a fatty acid derivative with the formula (1R-(1 alpha, 2 beta(Z)))-3-oxo-2-(2-pentenyl)cyclopentaneacetic acid. [ISBN:0387969845]
11	GO:0008105	0.0161497	asymmetric protein localization	biological_process	Any process in which a protein is transported to, or maintained in, a specific location such that it is distributed asymmetrically. [GOC:ma]
11	GO:0009200	0.0161497	deoxyribonucleoside triphosphate metabolic process	biological_process	The chemical reactions and pathways involving a deoxyribonucleoside triphosphate, a compound consisting of a nucleobase linked to a deoxyribose sugar esterified with triphosphate on the sugar. [GOC:go_curators, ISBN:0198506732]
11	GO:0009202	0.0161497	deoxyribonucleoside triphosphate biosynthetic process	biological_process	The chemical reactions and pathways resulting in the formation of a deoxyribonucleoside triphosphate, a compound consisting of a nucleobase linked to a deoxyribose sugar esterified with triphosphate on the sugar. [GOC:go_curators, ISBN:0198506732]
11	GO:0010581	0.0161497	regulation of starch biosynthetic process	biological_process	An process which modulate the frequency, rate or extent of starch biosynthesis, the chemical reactions and pathways resulting in the formation of starch. [GOC:tb]
11	GO:0010962	0.0161497	regulation of glucan biosynthetic process	biological_process	Any process that modulates the rate, frequency, or extent of glucan biosynthesis. Glucan biosynthetic processes are the chemical reactions and pathways resulting in the formation of glucans, polysaccharides consisting only of glucose residues. [GOC:dph, GOC:tb]
11	GO:0015904	0.0161497	tetracycline transport	biological_process	The directed movement of tetracycline into, out of or within a cell, or between cells, by means of some agent such as a transporter or pore. Tetracycline is a broad spectrum antibiotic that blocks binding of aminoacyl tRNA to the ribosomes of both Gram-positive and Gram-negative organisms (and those of organelles). [CHEBI:27902, GOC:curators]
11	GO:0032885	0.0161497	regulation of polysaccharide biosynthetic process	biological_process	Any process that modulates the frequency, rate or extent of the chemical reactions and pathways resulting in the formation of polysaccharides. [GOC:mah]
11	GO:0042891	0.0161497	antibiotic transport	biological_process	The directed movement of an antibiotic, a substance produced by or derived from certain fungi, bacteria, and other organisms, that can destroy or inhibit the growth of other microorganisms, into, out of or within a cell, or between cells, by means of some agent such as a transporter or pore. [GOC:jl]
11	GO:0043433	0.0161497	negative regulation of sequence-specific DNA binding transcription factor activity	biological_process	Any process that stops, prevents, or reduces the frequency, rate or extent of the activity of a transcription factor, any factor involved in the initiation or regulation of transcription. [GOC:jl]
11	GO:0045176	0.0161497	apical protein localization	biological_process	Any process in which a protein is transported to, or maintained in, apical regions of the cell. [GOC:bf]
11	GO:0051090	0.0161497	regulation of sequence-specific DNA binding transcription factor activity	biological_process	Any process that modulates the frequency, rate or extent of the activity of a transcription factor, any factor involved in the initiation or regulation of transcription. [GOC:ai]
11	GO:0055047	0.0161497	generative cell mitosis	biological_process	The process in which the generative cell divides by mitosis to form two haploid cells. These will subsequently differentiate into sperm cells. [GOC:mtg_plant]
11	GO:1901998	0.0161497	toxin transport	biological_process	The directed movement of a toxin into, out of or within a cell, or between cells, by means of some agent such as a transporter or pore. [GOC:dph, GOC:TermGenie, PMID:17118486]
11	GO:0010817	0.016413	regulation of hormone levels	biological_process	Any process that modulates the levels of hormone within an organism or a tissue. A hormone is any substance formed in very small amounts in one specialized organ or group of cells and carried (sometimes in the bloodstream) to another organ or group of cells in the same organism, upon which it has a specific regulatory action. [GOC:BHF, GOC:dph, GOC:tb]
11	GO:0045934	0.016413	negative regulation of nucleobase-containing compound metabolic process	biological_process	Any cellular process that stops, prevents, or reduces the frequency, rate or extent of the chemical reactions and pathways involving nucleobases, nucleosides, nucleotides and nucleic acids. [GOC:go_curators]
11	GO:0009657	0.0168748	plastid organization	biological_process	A process that is carried out at the cellular level which results in the assembly, arrangement of constituent parts, or disassembly of a plastid. [GOC:mah]
11	GO:0010558	0.0174358	negative regulation of macromolecule biosynthetic process	biological_process	Any process that decreases the rate, frequency or extent of the chemical reactions and pathways resulting in the formation of a macromolecule, any molecule of high relative molecular mass, the structure of which essentially comprises the multiple repetition of units derived, actually or conceptually, from molecules of low relative molecular mass. [GOC:dph, GOC:tb]
11	GO:0051172	0.0174358	negative regulation of nitrogen compound metabolic process	biological_process	Any process that stops, prevents, or reduces the frequency, rate or extent of the chemical reactions and pathways involving nitrogen or nitrogenous compounds. [GOC:ai, GOC:tb]
11	GO:2000113	0.0174358	negative regulation of cellular macromolecule biosynthetic process	biological_process	Any process that stops, prevents, or reduces the frequency, rate or extent of cellular macromolecule biosynthetic process. [GOC:obol]
11	GO:0052541	0.0179383	plant-type cell wall cellulose metabolic process	biological_process	The chemical reactions and pathways involving cellulose, a linear beta1-4 glucan of molecular mass 50-400 kDa with the pyranose units in the -4C1 conformation, as part of the organization and biogenesis of the cell wall. [GOC:mah, ISBN:0198506732]
11	GO:0043647	0.0184076	inositol phosphate metabolic process	biological_process	The chemical reactions and pathways involving inositol phosphate, 1,2,3,4,5,6-cyclohexanehexol, with one or more phosphate groups attached. [CHEBI:24848, GOC:jl]
11	GO:0044036	0.0191035	cell wall macromolecule metabolic process	biological_process	The chemical reactions and pathways involving macromolecules forming, or destined to form, part of the cell wall. A cell wall is a rigid or semi-rigid envelope lying outside the cell membrane of plant, fungal and most prokaryotic cells, maintaining their shape and protecting them from osmotic lysis. [GOC:jl, GOC:mah]
11	GO:0031327	0.0201893	negative regulation of cellular biosynthetic process	biological_process	Any process that stops, prevents, or reduces the frequency, rate or extent of the chemical reactions and pathways resulting in the formation of substances, carried out by individual cells. [GOC:mah]
11	GO:0016444	0.0207101	somatic cell DNA recombination	biological_process	Recombination occurring within or between DNA molecules in somatic cells. [GOC:ma]
11	GO:0009890	0.0207746	negative regulation of biosynthetic process	biological_process	Any process that stops, prevents, or reduces the rate of the chemical reactions and pathways resulting in the formation of substances. [GOC:go_curators]
11	GO:0009108	0.0215144	coenzyme biosynthetic process	biological_process	The chemical reactions and pathways resulting in the formation of coenzymes, any of various nonprotein organic cofactors that are required, in addition to an enzyme and a substrate, for an enzymatic reaction to proceed. [GOC:ai]
11	GO:0016144	0.0215144	S-glycoside biosynthetic process	biological_process	The chemical reactions and pathways resulting in the formation of S-glycosides, any compound in which a glycosyl group has been substituted into a thiol group. [ISBN:0198506732]
11	GO:0019758	0.0215144	glycosinolate biosynthetic process	biological_process	The chemical reactions and pathways resulting in the formation of glycosinolates, substituted thioglycosides found in rapeseed products and related cruciferae. [GOC:mah, http://www.gardeneaters.net/family_characteristics.html]
11	GO:0019761	0.0215144	glucosinolate biosynthetic process	biological_process	The chemical reactions and pathways resulting in the formation of glucosinolates, substituted thioglucosides found in rapeseed products and related cruciferae. [GOC:ai]
11	GO:0010304	0.0236478	PSII associated light-harvesting complex II catabolic process	biological_process	The chemical reactions and pathways resulting in the breakdown of one or more components of the light-harvesting complex of photosystem II. [GOC:mah, PMID:16157880]
11	GO:0031408	0.0236478	oxylipin biosynthetic process	biological_process	The chemical reactions and pathways resulting in the formation of any oxylipin, any of a group of biologically active compounds formed by oxidative metabolism of polyunsaturated fatty acids. [GOC:mah, PMID:11960741]
11	GO:0008356	0.0267453	asymmetric cell division	biological_process	The asymmetric division of cells to produce two daughter cells with different developmental potentials. It is of fundamental significance for the generation of cell diversity. [PMID:11672519]
11	GO:0031407	0.0267453	oxylipin metabolic process	biological_process	The chemical reactions and pathways involving any oxylipin, any of a group of biologically active compounds formed by oxidative metabolism of polyunsaturated fatty acids. [GOC:mah, PMID:11960741]
11	GO:0009117	0.0291372	nucleotide metabolic process	biological_process	The chemical reactions and pathways involving a nucleotide, a nucleoside that is esterified with (ortho)phosphate or an oligophosphate at any hydroxyl group on the glycose moiety; may be mono-, di- or triphosphate; this definition includes cyclic nucleotides (nucleoside cyclic phosphates). [GOC:ma]
11	GO:0006073	0.029493	cellular glucan metabolic process	biological_process	The chemical reactions and pathways involving glucans, polysaccharides consisting only of glucose residues. [ISBN:0198547684]
11	GO:0044042	0.029493	glucan metabolic process	biological_process	The chemical reactions and pathways involving glucans, polysaccharides consisting only of glucose residues. [GOC:jl]
11	GO:0005975	0.0301305	carbohydrate metabolic process	biological_process	The chemical reactions and pathways involving carbohydrates, any of a group of organic compounds based of the general formula Cx(H2O)y. Includes the formation of carbohydrate derivatives by the addition of a carbohydrate residue to another molecule. [GOC:mah, ISBN:0198506732]
11	GO:0016128	0.0316509	phytosteroid metabolic process	biological_process	The chemical reactions and pathways involving phytosteroids, steroids of higher plants that differ from animal steroids in having substitutions at C24 and/or a double bond at C22. Phytosteroids are so named because they occur in higher plants; some, notably ergosterol, are also found in fungi. [GOC:mah, ISBN:0198547684]
11	GO:0016129	0.0316509	phytosteroid biosynthetic process	biological_process	The chemical reactions and pathways resulting in the formation of phytosteroids, steroids that differ from animal steroids in having substitutions at C24 and/or a double bond at C22. Phytosteroids are so named because they occur in higher plants; some, notably ergosterol, are also found in fungi. [GOC:go_curators, GOC:mah, ISBN:0471331309]
11	GO:0016131	0.0316509	brassinosteroid metabolic process	biological_process	The chemical reactions and pathways involving brassinosteroids, any of a group of steroid derivatives that occur at very low concentrations in plant tissues and may have hormone-like effects. [ISBN:0192801023]
11	GO:0016132	0.0316509	brassinosteroid biosynthetic process	biological_process	The chemical reactions and pathways resulting in the formation of brassinosteroids, any of a group of steroid derivatives that occur at very low concentrations in plant tissues and may have hormone-like effects. [ISBN:0192801023]
11	GO:0000082	0.0320411	G1/S transition of mitotic cell cycle	biological_process	The mitotic cell cycle transition by which a cell in G1 commits to S phase. The process begins with the build up of G1 cyclin-dependent kinase (G1 CDK), resulting in the activation of transcription of G1 cyclins. The process ends with the positive feedback of the G1 cyclins on the G1 CDK which commits the cell to S phase, in which DNA replication is initiated. [GOC:mtg_cell_cycle]
11	GO:0006021	0.0320411	inositol biosynthetic process	biological_process	The chemical reactions and pathways resulting in the formation of inositol, 1,2,3,4,5,6-cyclohexanehexol, a growth factor for animals and microorganisms. [CHEBI:24848, ISBN:0198547684]
11	GO:0006072	0.0320411	glycerol-3-phosphate metabolic process	biological_process	The chemical reactions and pathways involving glycerol-3-phosphate, a phosphoric monoester of glycerol. [GOC:go_curators, ISBN:0198506732]
11	GO:0006471	0.0320411	protein ADP-ribosylation	biological_process	The transfer, from NAD, of ADP-ribose to protein amino acids. [GOC:pr, RESID:AA0040, RESID:AA0168, RESID:AA0169, RESID:AA0231, RESID:AA0237, RESID:AA0295]
11	GO:0006657	0.0320411	CDP-choline pathway	biological_process	The phosphatidylcholine biosynthetic process that begins with the phosphorylation of choline and ends with the combination of CDP-choline with diacylglycerol to form phosphatidylcholine. [ISBN:0471331309, MetaCyc:PWY3O-450]
11	GO:0008156	0.0320411	negative regulation of DNA replication	biological_process	Any process that stops, prevents, or reduces the frequency, rate or extent of DNA replication. [GOC:go_curators]
11	GO:0010069	0.0320411	zygote asymmetric cytokinesis in embryo sac	biological_process	The division of the zygote in a plane perpendicular to the long axis of the embryo sac to produce a larger basal cell near the micropyle and a small terminal cell close to what was the central cell and is now the developing endosperm. An example of this process is found in Arabidopsis thaliana. [GOC:mtg_sensu, GOC:tb, ISBN:0865427429]
11	GO:0010070	0.0320411	zygote asymmetric cell division	biological_process	The division of the zygote into two daughter cells that will adopt developmentally distinct potentials. [GOC:tb]
11	GO:0010082	0.0320411	regulation of root meristem growth	biological_process	Any process involved in maintaining the size and shape of a root meristem. [GOC:tb]
11	GO:0010424	0.0320411	DNA methylation on cytosine within a CG sequence	biological_process	The covalent transfer of a methyl group to C-5 or N-4 of a cytosine located within a CG sequence in a DNA molecule. [GOC:dph, GOC:tb, PMID:17239600]
11	GO:0019287	0.0320411	isopentenyl diphosphate biosynthetic process, mevalonate pathway	biological_process	The chemical reactions and pathways resulting in the formation of isopentenyl diphosphate, via the intermediate mevalonate. This pathway converts acetate, in the form of acetyl-CoA, to isopentenyl diphosphate (IPP), the fundamental unit in isoprenoid biosynthesis, through a series of mevalonate intermediates. [GOC:go_curators, MetaCyc:PWY-922]
11	GO:0032876	0.0320411	negative regulation of DNA endoreduplication	biological_process	Any process that stops, prevents, or reduces the frequency, rate or extent of DNA endoreduplication. [GOC:mah]
11	GO:0032881	0.0320411	regulation of polysaccharide metabolic process	biological_process	Any process that modulates the frequency, rate or extent of the chemical reactions and pathways involving polysaccharides. [GOC:mah]
11	GO:0042754	0.0320411	negative regulation of circadian rhythm	biological_process	Any process that stops, prevents, or reduces the frequency, rate or extent of a circadian rhythm behavior. [GOC:go_curators]
11	GO:0051446	0.0320411	positive regulation of meiotic cell cycle	biological_process	Any process that activates or increases the frequency, rate or extent of progression through the meiotic cell cycle. [GOC:ai, GOC:dph, GOC:tb]
11	GO:0052646	0.0320411	alditol phosphate metabolic process	biological_process	The chemical reactions and pathways involving alditol phosphates, any phosphorylated polyhydric alcohol derived from the acyclic form of a monosaccharide by reduction of its aldehyde or keto group to an alcoholic group. [CHEBI:22297, ISBN:0198506732]
11	GO:2000104	0.0320411	negative regulation of DNA-dependent DNA replication	biological_process	Any process that stops, prevents, or reduces the frequency, rate or extent of DNA-dependent DNA replication. [GOC:mah]
11	GO:2000904	0.0320411	regulation of starch metabolic process	biological_process	Any process that modulates the frequency, rate or extent of starch metabolic process. [GOC:obol]
11	GO:0016143	0.0339279	S-glycoside metabolic process	biological_process	The chemical reactions and pathways involving S-glycosides, any compound in which a glycosyl group has been substituted into a thiol group. [ISBN:0198506732]
11	GO:0019757	0.0339279	glycosinolate metabolic process	biological_process	The chemical reactions and pathways involving glycosinolates, substituted thioglycosides found in rapeseed products and related cruciferae. [GOC:mah, http://www.gardeneaters.net/family_characteristics.html]
11	GO:0019760	0.0339279	glucosinolate metabolic process	biological_process	The chemical reactions and pathways involving glucosinolates, substituted thioglucosides found in rapeseed products and related cruciferae. They are metabolized to a variety of toxic products which are most likely the cause of hepatocytic necrosis in animals and humans. [CHEBI:24279, GOC:curators]
11	GO:0016126	0.0353572	sterol biosynthetic process	biological_process	The chemical reactions and pathways resulting in the formation of sterols, steroids with one or more hydroxyl groups and a hydrocarbon side-chain in the molecule. [GOC:go_curators]
11	GO:0016125	0.0368211	sterol metabolic process	biological_process	The chemical reactions and pathways involving sterols, steroids with one or more hydroxyl groups and a hydrocarbon side-chain in the molecule. [ISBN:0198547684]
11	GO:0010207	0.0383197	photosystem II assembly	biological_process	The aggregation, arrangement and bonding together of a set of components to form a photosystem II complex on the thylakoid membrane. The photosystem II complex consists of at least 20 polypeptides and around 80 cofactors in most organisms. [GOC:aa, GOC:pz]
11	GO:0009409	0.0403172	response to cold	biological_process	Any process that results in a change in state or activity of a cell or an organism (in terms of movement, secretion, enzyme production, gene expression, etc.) as a result of a cold stimulus, a temperature stimulus below the optimal temperature for that organism. [GOC:lr]
11	GO:0019748	0.0428667	secondary metabolic process	biological_process	The chemical reactions and pathways resulting in many of the chemical changes of compounds that are not necessarily required for growth and maintenance of cells, and are often unique to a taxon. In multicellular organisms secondary metabolism is generally carried out in specific cell types, and may be useful for the organism as a whole. In unicellular organisms, secondary metabolism is often used…
11	GO:0048449	0.0430235	floral organ formation	biological_process	The process that gives rise to floral organs. This process pertains to the initial formation of a structure from unspecified parts. [GOC:jid, GOC:PO_curators, PO:0025395]
11	GO:0045892	0.0442086	negative regulation of transcription, DNA-dependent	biological_process	Any process that stops, prevents, or reduces the frequency, rate or extent of cellular DNA-dependent transcription. [GOC:go_curators, GOC:txnOH]
11	GO:0051253	0.0442086	negative regulation of RNA metabolic process	biological_process	Any process that stops, prevents, or reduces the frequency, rate or extent of the chemical reactions and pathways involving RNA. [GOC:ai]
11	GO:0009886	0.0442485	post-embryonic morphogenesis	biological_process	The process, occurring after embryonic development, by which anatomical structures are generated and organized. [GOC:go_curators]
11	GO:0051302	0.0444324	regulation of cell division	biological_process	Any process that modulates the frequency, rate or extent of the physical partitioning and separation of a cell into daughter cells. [GOC:go_curators]
11	GO:0042446	0.0446608	hormone biosynthetic process	biological_process	The chemical reactions and pathways resulting in the formation of any hormone, naturally occurring substances secreted by specialized cells that affects the metabolism or behavior of other cells possessing functional receptors for the hormone. [CHEBI:24621, GOC:jl]
11	GO:0006355	0.0452915	regulation of transcription, DNA-dependent	biological_process	Any process that modulates the frequency, rate or extent of cellular DNA-dependent transcription. [GOC:go_curators, GOC:txnOH]
11	GO:0031324	0.0462501	negative regulation of cellular metabolic process	biological_process	Any process that stops, prevents, or reduces the frequency, rate or extent of the chemical reactions and pathways by which individual cells transform chemical substances. [GOC:mah]
11	GO:0019252	0.0463329	starch biosynthetic process	biological_process	The chemical reactions and pathways resulting in the formation of starch, the most important reserve polysaccharide in plants. [GOC:ai]
11	GO:0006656	0.0476783	phosphatidylcholine biosynthetic process	biological_process	The chemical reactions and pathways resulting in the formation of phosphatidylcholines, any of a class of glycerophospholipids in which the phosphatidyl group is esterified to the hydroxyl group of choline. [ISBN:0198506732]
11	GO:0009772	0.0476783	photosynthetic electron transport in photosystem II	biological_process	A photosynthetic electron transport chain in which electrons move from the primary electron acceptor (Quinone, Q) through a chain of electron transport molecules in the thylakoid membrane until they reach the ultimate electron acceptor of Photosystem II, which is plastocyanin (PC). The electron is then passed to the P700 chlorophyll a molecules of the reaction centre of photosystem I. [GOC:jid, I…
11	GO:0010216	0.0476783	maintenance of DNA methylation	biological_process	Any process involved in maintaining the methylation state of a nucleotide sequence. [PMID:11898023]
11	GO:0015988	0.0476783	energy coupled proton transmembrane transport, against electrochemical gradient	biological_process	The transport of protons across a membrane and against an electrochemical gradient, using energy from a source such as ATP hydrolysis, light, or electron transport. [GOC:mah]
11	GO:0015991	0.0476783	ATP hydrolysis coupled proton transport	biological_process	The transport of protons against an electrochemical gradient, using energy from ATP hydrolysis. [GOC:mah, GOC:vw]
11	GO:0019464	0.0476783	glycine decarboxylation via glycine cleavage system	biological_process	The chemical reactions and pathways resulting in the breakdown of glycine by oxidative cleavage to carbon dioxide, ammonia, and a methylene group, mediated by enzymes of the glycine cleavage complex. [MetaCyc:GLYCLEAV-PWY]
11	GO:0032776	0.0476783	DNA methylation on cytosine	biological_process	The covalent transfer of a methyl group to C-5 or N-4 of cytosine in a DNA molecule. [GOC:pf]
11	GO:0042549	0.0476783	photosystem II stabilization	biological_process	The stabilization of the photosystem II protein complex, resulting from the phosphorylation of its structural protein subunits, in a cell actively involved in photosynthesis. [GOC:go_curators]
11	GO:0045493	0.0476783	xylan catabolic process	biological_process	The chemical reactions and pathways resulting in the breakdown of xylan, a polymer containing a beta-1,4-linked D-xylose backbone. [GOC:go_curators, PMID:11931668]
11	GO:0046470	0.0476783	phosphatidylcholine metabolic process	biological_process	The chemical reactions and pathways involving phosphatidylcholines, any of a class of glycerophospholipids in which the phosphatidyl group is esterified to the hydroxyl group of choline. They are important constituents of cell membranes. [ISBN:0198506732]
11	GO:0052546	0.0483719	cell wall pectin metabolic process	biological_process	The chemical reactions and pathways involving pectin, a polymer containing a backbone of alpha-1,4-linked D-galacturonic acid residues, as part of the organization and biogenesis of the cell wall. [GOC:ai]
11	GO:2001141	0.048556	regulation of RNA biosynthetic process	biological_process	Any process that modulates the frequency, rate or extent of RNA biosynthetic process. [GOC:dph]
11	GO:0006694	0.049781	steroid biosynthetic process	biological_process	The chemical reactions and pathways resulting in the formation of steroids, compounds with a 1,2,cyclopentanoperhydrophenanthrene nucleus; includes de novo formation and steroid interconversion by modification. [GOC:go_curators]
12	GO:0051567	1.42511e-09	histone H3-K9 methylation	biological_process	The modification of histone H3 by addition of a methyl group to lysine at position 9 of the histone. [GOC:ai]
12	GO:0006306	6.97662e-08	DNA methylation	biological_process	The covalent transfer of a methyl group to either N-6 of adenine or C-5 or N-4 of cytosine. [GOC:ems, ISBN:0198506732]
12	GO:0000911	1.10103e-07	cytokinesis by cell plate formation	biological_process	The process of dividing the cytoplasm of a parent cell where a structure forms in the cytoplasm and grows until reaching the plasma membrane, thereby completely separating the cytoplasms of adjacent progeny cells. An example of this is found in Arabidopsis thaliana. [GOC:clt]
12	GO:0008283	2.28857e-06	cell proliferation	biological_process	The multiplication or reproduction of cells, resulting in the expansion of a cell population. [GOC:mah, GOC:mb]
12	GO:0000724	3.40367e-06	double-strand break repair via homologous recombination	biological_process	The error-free repair of a double-strand break in DNA in which the broken DNA molecule is repaired using homologous sequences. A strand in the broken DNA searches for a homologous region in an intact chromosome to serve as the template for DNA synthesis. The restoration of two intact DNA molecules results in the exchange, reciprocal or nonreciprocal, of genetic material between the intact DNA mol…
12	GO:0006275	3.15661e-05	regulation of DNA replication	biological_process	Any process that modulates the frequency, rate or extent of DNA replication. [GOC:go_curators]
12	GO:0006270	6.48422e-05	DNA replication initiation	biological_process	The process in which DNA-dependent DNA replication is started; this involves the separation of a stretch of the DNA double helix, the recruitment of DNA polymerases and the initiation of polymerase action. [ISBN:071673706X, ISBN:0815316194]
12	GO:0006268	0.000132121	DNA unwinding involved in replication	biological_process	The process in which interchain hydrogen bonds between two strands of DNA are broken or 'melted', generating unpaired template strands for DNA replication. [ISBN:071673706X, ISBN:0815316194]
12	GO:0006084	0.000279677	acetyl-CoA metabolic process	biological_process	The chemical reactions and pathways involving acetyl-CoA, a derivative of coenzyme A in which the sulfhydryl group is acetylated; it is a metabolite derived from several pathways (e.g. glycolysis, fatty acid oxidation, amino-acid catabolism) and is further metabolized by the tricarboxylic acid cycle. It is a key intermediate in lipid and terpenoid biosynthesis. [ISBN:0198547684]
12	GO:0000084	0.000365159	S phase of mitotic cell cycle	biological_process	S phase occurring as part of the mitotic cell cycle. S phase is the part of the cell cycle during which DNA synthesis takes place. A mitotic cell cycle is one which canonically comprises four successive phases called G1, S, G2, and M and includes replication of the genome and the subsequent segregation of chromosomes into daughter cells. [GOC:dph, GOC:mah, ISBN:0815316194]
12	GO:0007129	0.000399817	synapsis	biological_process	The cell cycle process in which the side by side pairing and physical juxtaposition of homologous chromosomes is created at the metaphase plate. [GOC:elh]
12	GO:0015979	0.000544707	photosynthesis	biological_process	The synthesis by organisms of organic chemical compounds, especially carbohydrates, from carbon dioxide (CO2) using energy obtained from light rather than from the oxidation of chemical compounds. [ISBN:0198547684]
12	GO:0006271	0.00108169	DNA strand elongation involved in DNA replication	biological_process	The process in which a DNA strand is synthesized from template DNA during replication by the action of polymerases, which add nucleotides to the 3' end of the nascent DNA strand. [ISBN:071673706X, ISBN:0815316194]
12	GO:0007067	0.00139017	mitosis	biological_process	A cell cycle process comprising the steps by which the nucleus of a eukaryotic cell divides; the process involves condensation of chromosomal DNA into a highly compacted form. Canonically, mitosis produces two daughter nuclei whose chromosome complement is identical to that of the mother cell. [GOC:dph, GOC:ma, GOC:mah, ISBN:0198547684]
12	GO:0010075	0.00160992	regulation of meristem growth	biological_process	Any process involved in maintaining the size and shape of a meristem. [GOC:tb]
12	GO:0006260	0.00186128	DNA replication	biological_process	The cellular metabolic process in which a cell duplicates one or more molecules of DNA. DNA replication begins when specific sequences, known as origins of replication, are recognized and bound by initiation proteins, and ends when the original DNA molecule has been completely duplicated and the copies topologically separated. The unit of replication usually corresponds to the genome of the cell,…
12	GO:0006269	0.0021362	DNA replication, synthesis of RNA primer	biological_process	The synthesis of a short RNA polymer, usually 4-15 nucleotides long, using one strand of unwound DNA as a template; the RNA then serves as a primer from which DNA polymerases extend synthesis. [PMID:11395402]
12	GO:0048439	0.00306034	flower morphogenesis	biological_process	The process in which the anatomical structures of the flower are generated and organized. [GOC:go_curators]
12	GO:0006576	0.00357255	cellular biogenic amine metabolic process	biological_process	The chemical reactions and pathways occurring at the level of individual cells involving any of a group of naturally occurring, biologically active amines, such as norepinephrine, histamine, and serotonin, many of which act as neurotransmitters. [GOC:jl, ISBN:0395825172]
12	GO:0000038	0.00384918	very long-chain fatty acid metabolic process	biological_process	The chemical reactions and pathways involving a fatty acid which has a chain length greater than C22. [CHEBI:27283, GOC:hjd]
12	GO:0048438	0.00408786	floral whorl development	biological_process	The process whose specific outcome is the progression of a floral whorl over time, from its formation to the mature structure. A floral whorl is a circular arrangement of parts of a flower arising from a stem of a plant. [GOC:dph, GOC:go_curators, GOC:PO_curators, GOC:tb, PO:0025023]
12	GO:0010564	0.00470341	regulation of cell cycle process	biological_process	Any process that modulates a cellular process that is involved in the progression of biochemical and morphological phases and events that occur in a cell during successive cell replication or nuclear replication events. [GOC:dph, GOC:tb]
12	GO:0048449	0.00470341	floral organ formation	biological_process	The process that gives rise to floral organs. This process pertains to the initial formation of a structure from unspecified parts. [GOC:jid, GOC:PO_curators, PO:0025395]
12	GO:0006091	0.00479308	generation of precursor metabolites and energy	biological_process	The chemical reactions and pathways resulting in the formation of precursor metabolites, substances from which energy is derived, and any process involved in the liberation of energy from these substances. [GOC:jl]
12	GO:0042446	0.00499206	hormone biosynthetic process	biological_process	The chemical reactions and pathways resulting in the formation of any hormone, naturally occurring substances secreted by specialized cells that affects the metabolism or behavior of other cells possessing functional receptors for the hormone. [CHEBI:24621, GOC:jl]
12	GO:0031047	0.00573897	gene silencing by RNA	biological_process	Any process in which RNA molecules inactivate expression of target genes. [GOC:dph, GOC:mah, GOC:tb, PMID:15020054]
12	GO:0009909	0.00695745	regulation of flower development	biological_process	Any process that modulates the frequency, rate or extent of flower development. [GOC:go_curators]
12	GO:0048229	0.0082911	gametophyte development	biological_process	The process whose specific outcome is the progression of the gametophyte over time, from its formation to the mature structure. The gametophyte is the gamete-producing individual or phase in the life cycle having alternation of generations. An example of this process is found in Arabidopsis thaliana. [GOC:jid, PO:0009004]
12	GO:0006346	0.00895953	methylation-dependent chromatin silencing	biological_process	Repression of transcription by methylation of DNA, leading to the formation of heterochromatin. [GOC:mah]
12	GO:0007062	0.00968594	sister chromatid cohesion	biological_process	The cell cycle process in which the sister chromatids of a replicated chromosome are associated with each other. [GOC:jh, GOC:mah, ISBN:0815316194]
12	GO:0045229	0.0101396	external encapsulating structure organization	biological_process	A process that is carried out at the cellular level which results in the assembly, arrangement of constituent parts, or disassembly of external structures that lie outside the plasma membrane and surround the entire cell. [GOC:ai, GOC:dph, GOC:jl, GOC:mah]
12	GO:0010389	0.0121803	regulation of G2/M transition of mitotic cell cycle	biological_process	Any process that modulates the rate or extent of progression from G2 phase to M phase of the mitotic cell cycle. [GOC:mtg_cell_cycle, PMID:17329565]
12	GO:0006568	0.0129846	tryptophan metabolic process	biological_process	The chemical reactions and pathways involving tryptophan, the chiral amino acid 2-amino-3-(1H-indol-3-yl)propanoic acid. [ISBN:0198547684]
12	GO:0006586	0.0129846	indolalkylamine metabolic process	biological_process	The chemical reactions and pathways involving indolalkylamines, indole or indole derivatives containing a primary, secondary, or tertiary amine group. [CHEBI:38631, GOC:curators]
12	GO:0000086	0.0130949	G2/M transition of mitotic cell cycle	biological_process	The mitotic cell cycle transition by which a cell in G2 commits to M phase. The process begins when the kinase activity of M cyclin/CDK complex reaches a threshold high enough for the cell cycle to proceed. This is accomplished by activating a positive feedback loop that results in the accumulation of unphosphorylated and active M cyclin/CDK complex. [GOC:mtg_cell_cycle]
12	GO:0048481	0.0140523	ovule development	biological_process	The process whose specific outcome is the progression of the ovule over time, from its formation to the mature structure. The ovule is the structure in seed plants enclosing the female gametophyte, and is composed of the nucellus, one or two integuments, and the funiculus; it develops into the seed. [GOC:tb]
12	GO:0007389	0.0141885	pattern specification process	biological_process	Any developmental process that results in the creation of defined areas or spaces within an organism to which cells respond and eventually are instructed to differentiate. [GOC:go_curators, GOC:isa_complete, ISBN:0521436125]
12	GO:0046165	0.0141885	alcohol biosynthetic process	biological_process	The chemical reactions and pathways resulting in the formation of alcohols, any of a class of compounds containing one or more hydroxyl groups attached to a saturated carbon atom. [CHEBI:30879, GOC:ai]
12	GO:0048609	0.0141885	multicellular organismal reproductive process	biological_process	The process, occurring above the cellular level, that is pertinent to the reproductive function of a multicellular organism. This includes the integrated processes at the level of tissues and organs. [GOC:dph, GOC:jid, GOC:tb]
12	GO:0019684	0.0147329	photosynthesis, light reaction	biological_process	The light reactions of photosynthesis, which take place in photosystems II and I. Light energy is harvested and used to power the transfer of electrons among a series of electron donors and acceptors. The final electron acceptor is NADP+, which is reduced to NADPH. NADPH generated from light reactions is used in sugar synthesis in dark reactions. Light reactions also generate a proton motive forc…
12	GO:0006301	0.014857	postreplication repair	biological_process	The conversion of DNA-damage induced single-stranded gaps into large molecular weight DNA after replication. Includes pathways that remove replication-blocking lesions in conjunction with DNA replication. [GOC:elh]
12	GO:0035670	0.0150531	plant-type ovary development	biological_process	The process whose specific outcome is the progression of an ovary that produces an ovule over time, from its formation to the mature structure. The ovary is the enlarged basal portion of a carpel and matures into a fruit. An ovule is the multicellular structure that gives rise to and contains the female reproductive cells, and develops into a seed. [GOC:bf, GOC:tb, ISBN:0879015322]
12	GO:0044283	0.0151141	small molecule biosynthetic process	biological_process	The chemical reactions and pathways resulting in the formation of small molecules, any low molecular weight, monomeric, non-encoded molecule. [GOC:curators, GOC:pde, GOC:vw]
12	GO:0032504	0.0158663	multicellular organism reproduction	biological_process	The biological process in which new individuals are produced by one or two multicellular organisms. The new individuals inherit some proportion of their genetic material from the parent or parents. [GOC:isa_complete, GOC:jid]
12	GO:1901990	0.0160978	regulation of mitotic cell cycle phase transition	biological_process	Any process that modulates the frequency, rate or extent of mitotic cell cycle phase transition. [GOC:mtg_cell_cycle, GOC:TermGenie, PMID:22841721]
12	GO:0007017	0.0164557	microtubule-based process	biological_process	Any cellular process that depends upon or alters the microtubule cytoskeleton, that part of the cytoskeleton comprising microtubules and their associated proteins. [GOC:mah]
12	GO:1901987	0.0171871	regulation of cell cycle phase transition	biological_process	Any process that modulates the frequency, rate or extent of cell cycle phase transition. [GOC:mtg_cell_cycle, GOC:TermGenie, PMID:22841721]
12	GO:0009555	0.0172166	pollen development	biological_process	The process whose specific outcome is the progression of the pollen grain over time, from its formation to the mature structure. The process begins with the meiosis of the microsporocyte to form four haploid microspores. The nucleus of each microspore then divides by mitosis to form a two-celled organism, the pollen grain, that contains a tube cell as well as a smaller generative cell. The pollen…
12	GO:1901617	0.0175701	organic hydroxy compound biosynthetic process	biological_process	The chemical reactions and pathways resulting in the formation of organic hydroxy compound. [GOC:pr, GOC:TermGenie]
12	GO:0044702	0.0183171	single organism reproductive process	biological_process	A biological process that directly contributes to the process of producing new individuals, involving a single organism. [GOC:jl]
12	GO:0044772	0.0183214	mitotic cell cycle phase transition	biological_process	The cell cycle process by which a cell commits to entering the next mitotic cell cycle phase. [GOC:mtg_cell_cycle]
12	GO:0000028	0.0191877	ribosomal small subunit assembly	biological_process	The aggregation, arrangement and bonding together of constituent RNAs and proteins to form the small ribosomal subunit. [GOC:jl]
12	GO:0000731	0.0191877	DNA synthesis involved in DNA repair	biological_process	Synthesis of DNA that proceeds from the broken 3' single-strand DNA end uses the homologous intact duplex as the template. [PMID:10357855]
12	GO:0006273	0.0191877	lagging strand elongation	biological_process	The synthesis of DNA from a template strand in a net 3' to 5' direction. Lagging strand DNA elongation proceeds by discontinuous synthesis of short stretches of DNA, known as Okazaki fragments, from RNA primers; these fragments are then joined by DNA ligase. Although each segment of nascent DNA is synthesized in the 5' to 3' direction, the overall direction of lagging strand synthesis is 3' to 5'…
12	GO:0006287	0.0191877	base-excision repair, gap-filling	biological_process	Repair of the damaged strand by the combined action of an apurinic endouclease that degrades a few bases on the damaged strand and a polymerase that synthesizes a 'patch' in the 5' to 3' direction, using the undamaged strand as a template. [ISBN:1550091131]
12	GO:0006297	0.0191877	nucleotide-excision repair, DNA gap filling	biological_process	Repair of the gap in the DNA helix by DNA polymerase and DNA ligase after the portion of the strand containing the lesion has been removed by pyrimidine-dimer repair enzymes. [ISBN:0815316194]
12	GO:0006407	0.0191877	rRNA export from nucleus	biological_process	The directed movement of rRNA from the nucleus to the cytoplasm; the rRNA is usually in the form of ribonucleoproteins. [GOC:ma, GOC:mah]
12	GO:0009445	0.0191877	putrescine metabolic process	biological_process	The chemical reactions and pathways involving putrescine, 1,4-diaminobutane; putrescine can be formed by decarboxylation of ornithine and is the metabolic precursor of spermidine and spermine. [GOC:ai]
12	GO:0009446	0.0191877	putrescine biosynthetic process	biological_process	The chemical reactions and pathways resulting in the formation of putrescine, 1,4-diaminobutane; putrescine can be synthesized from arginine or ornithine and is the metabolic precursor of spermidine and spermine. [GOC:go_curators, ISBN:0198506732]
12	GO:0009953	0.0191877	dorsal/ventral pattern formation	biological_process	The regionalization process in which the areas along the dorsal/ventral axis are established that will lead to differences in cell differentiation. The dorsal/ventral axis is defined by a line that runs orthogonal to both the anterior/posterior and left/right axes. The dorsal end is defined by the upper or back side of an organism. The ventral end is defined by the lower or front side of an organ…
12	GO:0018871	0.0191877	1-aminocyclopropane-1-carboxylate metabolic process	biological_process	The chemical reactions and pathways involving 1-aminocyclopropane-1-carboxylate, the anion of 1-aminocyclopropane-1-carboxylic acid, a natural product found in plant tissues. It is a key intermediate in the biosynthesis of ethylene (ethene), a fruit-ripening hormone in plants. [UM-BBD_pathwayID:acp]
12	GO:0019985	0.0191877	translesion synthesis	biological_process	The replication of damaged DNA by synthesis across a lesion in the template strand; a specialized DNA polymerase or replication complex inserts a defined nucleotide across from the lesion which allows DNA synthesis to continue beyond the lesion. This process can be mutagenic depending on the damaged nucleotide and the inserted nucleotide. [GOC:elh, PMID:10535901]
12	GO:0032352	0.0191877	positive regulation of hormone metabolic process	biological_process	Any process that activates or increases the frequency, rate or extent of the chemical reactions and pathways involving any hormone. [GOC:mah]
12	GO:0033240	0.0191877	positive regulation of cellular amine metabolic process	biological_process	Any process that activates or increases the frequency, rate or extent of the chemical reactions and pathways involving amines. [GOC:mah]
12	GO:0033567	0.0191877	DNA replication, Okazaki fragment processing	biological_process	The DNA metabolic process, occurring during lagging strand synthesis, by which RNA primers are removed from Okazaki fragments, the resulting gaps filled by DNA polymerization, and the ends ligated to form a continuous strand. [GOC:mah, ISBN:0716720094]
12	GO:0042218	0.0191877	1-aminocyclopropane-1-carboxylate biosynthetic process	biological_process	The chemical reactions and pathways resulting in the formation of 1-aminocyclopropane-1-carboxylate, a natural product found in plant tissues. It is a key intermediate in the biosynthesis of ethylene (ethene), a fruit-ripening hormone in plants. [GOC:go_curators]
12	GO:0042255	0.0191877	ribosome assembly	biological_process	The aggregation, arrangement and bonding together of the mature ribosome and of its subunits. [GOC:ma]
12	GO:0042276	0.0191877	error-prone translesion synthesis	biological_process	The conversion of DNA-damage induced single-stranded gaps into large molecular weight DNA after replication by using a specialized DNA polymerase or replication complex to insert a defined nucleotide across the lesion. This process does not remove the replication-blocking lesions and causes an increase in the endogenous mutation level. For example, in E. coli, a low fidelity DNA polymerase, pol V…
12	GO:0043137	0.0191877	DNA replication, removal of RNA primer	biological_process	Removal of the Okazaki RNA primer from the lagging strand of replicating DNA, by a combination of the actions of DNA polymerase, DNA helicase and an endonuclease. [GOC:jl, PMID:12424238]
12	GO:0043988	0.0191877	histone H3-S28 phosphorylation	biological_process	The modification of histone H3 by the addition of an phosphate group to a serine residue at position 28 of the histone. [GOC:jl]
12	GO:0045004	0.0191877	DNA replication proofreading	biological_process	Correction of replication errors by DNA polymerase using a 3'-5' exonuclease activity. [GOC:ai]
12	GO:0045005	0.0191877	maintenance of fidelity involved in DNA-dependent DNA replication	biological_process	A DNA metabolic process that prevents or corrects errors to ensure that DNA is replicated accurately. Errors can be corrected either by intrinsic DNA polymerase proofreading activity or via mismatch repair. [GOC:mah, GOC:vw]
12	GO:0045764	0.0191877	positive regulation of cellular amino acid metabolic process	biological_process	Any process that activates or increases the frequency, rate or extent of the chemical reactions and pathways involving amino acid. [GOC:go_curators]
12	GO:0048262	0.0191877	determination of dorsal/ventral asymmetry	biological_process	Determination of asymmetry from the dorsal to the ventral side; as, the dorsoventral axis. [GOC:jid]
12	GO:0048263	0.0191877	determination of dorsal identity	biological_process	Determination of the identity of part of an organism or organ where those parts are of the type that occur in the dorsal region. Identity is considered to be the aggregate of characteristics by which a structure is recognized. [GOC:jid]
12	GO:0051029	0.0191877	rRNA transport	biological_process	The directed movement of rRNA, ribosomal ribonucleic acid, into, out of or within a cell, or between cells, by means of some agent such as a transporter or pore. [GOC:ai]
12	GO:0055047	0.0191877	generative cell mitosis	biological_process	The process in which the generative cell divides by mitosis to form two haploid cells. These will subsequently differentiate into sperm cells. [GOC:mtg_plant]
12	GO:0060964	0.0191877	regulation of gene silencing by miRNA	biological_process	Any process that modulates the rate, frequency, or extent of the downregulation of gene expression through the action of microRNAs (miRNAs), endogenous 21-24 nucleotide small RNAs processed from stem-loop RNA precursors (pre-miRNAs). Once incorporated into a RNA-induced silencing complex (RISC), miRNAs can downregulate gene expression by either of two posttranscriptional mechanisms: mRNA cleavage…
12	GO:0060966	0.0191877	regulation of gene silencing by RNA	biological_process	Any process that regulates the rate, frequency, or extent of gene silencing by RNA. Gene silencing by RNA is the process in which RNA molecules inactivate expression of target genes. [GOC:dph, GOC:tb]
12	GO:0080088	0.0191877	spermidine hydroxycinnamate conjugate biosynthetic process	biological_process	The chemical reactions and pathways resulting in the formation of spermidine hydroxycinnamate conjugates. [PMID:19077165]
12	GO:0080121	0.0191877	AMP transport	biological_process	The directed movement of AMP, adenosine monophosphate, into, out of or within a cell, or between cells, by means of some agent such as a transporter or pore. [PMID:18923018]
12	GO:0090355	0.0191877	positive regulation of auxin metabolic process	biological_process	Any process that increases the frequency, rate or extent of the chemical reactions and pathways involving auxins, plant hormones that regulate aspects of plant growth. [GOC:tb]
12	GO:0090358	0.0191877	positive regulation of tryptophan metabolic process	biological_process	Any process that increases the frequency, rate or extent of the chemical reactions and pathways involving tryptophan, the chiral amino acid 2-amino-3-(1H-indol-3-yl)propanoic acid. [GOC:tb]
12	GO:0044770	0.0195013	cell cycle phase transition	biological_process	The cell cycle process by which a cell commits to entering the next cell cycle phase. [GOC:mtg_cell_cycle]
12	GO:0006261	0.0202442	DNA-dependent DNA replication	biological_process	A DNA replication process that uses parental DNA as a template for the DNA-dependent DNA polymerases that synthesize the new strands. [GOC:mah, ISBN:0198506732]
12	GO:0046173	0.0209486	polyol biosynthetic process	biological_process	The chemical reactions and pathways resulting in the formation of a polyol, any alcohol containing three or more hydroxyl groups attached to saturated carbon atoms. [CHEBI:26191]
12	GO:0022412	0.0233189	cellular process involved in reproduction in multicellular organism	biological_process	A process, occurring at the cellular level, that is involved in the reproductive function of a multicellular organism. [GOC:isa_complete]
12	GO:0071555	0.0239385	cell wall organization	biological_process	A process that results in the assembly, arrangement of constituent parts, or disassembly of the cell wall, the rigid or semi-rigid envelope lying outside the cell membrane of plant, fungal and most prokaryotic cells, maintaining their shape and protecting them from osmotic lysis. [GOC:mah]
12	GO:0042546	0.0245146	cell wall biogenesis	biological_process	A cellular process that results in the biosynthesis of constituent macromolecules, assembly, and arrangement of constituent parts of a cell wall. Includes biosynthesis of constituent macromolecules, such as proteins and polysaccharides, and those macromolecular modifications that are involved in synthesis or assembly of the cellular component. A cell wall is the rigid or semi-rigid envelope lying…
12	GO:0031048	0.0260995	chromatin silencing by small RNA	biological_process	Repression of transcription by conversion of large regions of DNA into heterochromatin, directed by small RNAs sharing sequence identity to the repressed region. [GOC:dph, GOC:mtg_lung, GOC:ns]
12	GO:0044085	0.0266662	cellular component biogenesis	biological_process	A process that results in the biosynthesis of constituent macromolecules, assembly, and arrangement of constituent parts of a cellular component. Includes biosynthesis of constituent macromolecules, and those macromolecular modifications that are involved in synthesis or assembly of the cellular component. [GOC:jl, GOC:mah]
12	GO:0016444	0.0285809	somatic cell DNA recombination	biological_process	Recombination occurring within or between DNA molecules in somatic cells. [GOC:ma]
12	GO:0006066	0.0298811	alcohol metabolic process	biological_process	The chemical reactions and pathways involving alcohols, any of a class of compounds containing one or more hydroxyl groups attached to a saturated carbon atom. [CHEBI:30879, ISBN:0198506732]
12	GO:0042335	0.0325705	cuticle development	biological_process	The chemical reactions and pathways resulting in the formation of a cuticle, the outer layer of some animals and plants, which acts to prevent water loss. [ISBN:0192800825]
12	GO:0007276	0.035597	gamete generation	biological_process	The generation and maintenance of gametes in a multicellular organism. A gamete is a haploid reproductive cell. [GOC:ems, GOC:mtg_sensu]
12	GO:0007346	0.035597	regulation of mitotic cell cycle	biological_process	Any process that modulates the rate or extent of progress through the mitotic cell cycle. [GOC:dph, GOC:go_curators, GOC:tb]
12	GO:0048440	0.035597	carpel development	biological_process	The process whose specific outcome is the progression of the carpel over time, from its formation to the mature structure. A carpel is an organ (generally believed to be a modified foliar unit) at the centre of a flower, bearing one or more ovules and having its margins fused together or with other carpels to enclose the ovule in an ovary, and consisting also of a stigma and usually a style. [GOC…
12	GO:0007020	0.0357075	microtubule nucleation	biological_process	The 'de novo' formation of a microtubule, in which tubulin heterodimers form metastable oligomeric aggregates, some of which go on to support formation of a complete microtubule. Microtubule nucleation usually occurs from a specific site within a cell. [ISBN:0815316194]
12	GO:0009310	0.0357075	amine catabolic process	biological_process	The chemical reactions and pathways resulting in the breakdown of any organic compound that is weakly basic in character and contains an amino or a substituted amino group. Amines are called primary, secondary, or tertiary according to whether one, two, or three carbon atoms are attached to the nitrogen atom. [GOC:jl, ISBN:0198506732]
12	GO:0042402	0.0357075	cellular biogenic amine catabolic process	biological_process	The chemical reactions and pathways occurring at the level of individual cells resulting in the breakdown of biogenic amines, any of a group of naturally occurring, biologically active amines, such as norepinephrine, histamine, and serotonin, many of which act as neurotransmitters. [GOC:go_curators, GOC:jl, ISBN:0198506732]
12	GO:0042430	0.0357075	indole-containing compound metabolic process	biological_process	The chemical reactions and pathways involving compounds that contain an indole (2,3-benzopyrrole) skeleton. [CHEBI:24828, GOC:jl, GOC:mah]
12	GO:0000723	0.0367642	telomere maintenance	biological_process	Any process that contributes to the maintenance of proper telomeric length and structure by affecting and monitoring the activity of telomeric proteins and the length of telomeric DNA. These processes includes those that shorten and lengthen the telomeric DNA sequences. [GOC:elh, PMID:11092831]
12	GO:0008356	0.0367642	asymmetric cell division	biological_process	The asymmetric division of cells to produce two daughter cells with different developmental potentials. It is of fundamental significance for the generation of cell diversity. [PMID:11672519]
12	GO:0032200	0.0367642	telomere organization	biological_process	A process that is carried out at the cellular level which results in the assembly, arrangement of constituent parts, or disassembly of telomeres, terminal regions of a linear chromosome that include the telomeric DNA repeats and associated proteins. [GOC:dph, GOC:jl, GOC:mah]
12	GO:0060249	0.0367642	anatomical structure homeostasis	biological_process	A homeostatic process involved in the maintenance of an internal steady state within a defined anatomical structure of an organism, including control of cellular proliferation and death and control of metabolic function. An anatomical structure is any biological entity that occupies space and is distinguished from its surroundings. Anatomical structures can be macroscopic such as a carpel, or mic…
12	GO:0007010	0.0369314	cytoskeleton organization	biological_process	A process that is carried out at the cellular level which results in the assembly, arrangement of constituent parts, or disassembly of cytoskeletal structures. [GOC:dph, GOC:jl, GOC:mah]
12	GO:0000226	0.0371224	microtubule cytoskeleton organization	biological_process	A process that is carried out at the cellular level which results in the assembly, arrangement of constituent parts, or disassembly of cytoskeletal structures comprising microtubules and their associated proteins. [GOC:mah]
12	GO:0000278	0.0371224	mitotic cell cycle	biological_process	Progression through the phases of the mitotic cell cycle, the most common eukaryotic cell cycle, which canonically comprises four successive phases called G1, S, G2, and M and includes replication of the genome and the subsequent segregation of chromosomes into daughter cells. In some variant cell cycles nuclear replication or nuclear division may not be followed by cell division, or G1 and G2 ph…
12	GO:0000076	0.0380103	DNA replication checkpoint	biological_process	A cell cycle checkpoint that prevents the initiation of nuclear division until DNA replication is complete, thereby ensuring that progeny inherit a full complement of the genome. [GOC:curators, GOC:rn, PMID:11728327, PMID:12537518]
12	GO:0000447	0.0380103	endonucleolytic cleavage in ITS1 to separate SSU-rRNA from 5.8S rRNA and LSU-rRNA from tricistronic rRNA transcript (SSU-rRNA, 5.8S rRNA, LSU-rRNA)	biological_process	Endonucleolytic cleavage between the SSU-rRNA and the 5.8S rRNA of an rRNA molecule originally produced as a tricistronic rRNA transcript that contained the Small SubUnit (SSU) rRNA, the 5.8S rRNA, and the Large SubUnit (LSU) rRNA, in that order, from 5' to 3' along the primary transcript. [GOC:curators, PMID:10690410]
12	GO:0000460	0.0380103	maturation of 5.8S rRNA	biological_process	Any process involved in the maturation of a precursor 5.8S ribosomal RNA (rRNA) molecule into a mature 5.8S rRNA molecule. [GOC:curators]
12	GO:0000461	0.0380103	endonucleolytic cleavage to generate mature 3'-end of SSU-rRNA from (SSU-rRNA, 5.8S rRNA, LSU-rRNA)	biological_process	Endonucleolytic cleavage at the 3'-end of the SSU-rRNA from an originally tricistronic rRNA transcript that contained the Small Subunit (SSU) rRNA, the 5.8S rRNA, and the Large Subunit (LSU) rRNA in that order from 5' to 3' along the primary transcript, to produce the mature end of the SSU-rRNA. [GOC:krc, PMID:10690410]
12	GO:0000466	0.0380103	maturation of 5.8S rRNA from tricistronic rRNA transcript (SSU-rRNA, 5.8S rRNA, LSU-rRNA)	biological_process	Any process involved in the maturation of an rRNA molecule originally produced as part of a tricistronic rRNA transcript that contained the Small SubUnit (SSU) rRNA, the 5.8S rRNA, and the Large SubUnit (LSU) rRNA, in that order, from 5' to 3' along the primary transcript. [GOC:curators, PMID:10690410]
12	GO:0000479	0.0380103	endonucleolytic cleavage of tricistronic rRNA transcript (SSU-rRNA, 5.8S rRNA, LSU-rRNA)	biological_process	Endonucleolytic cleavage of a pre-rRNA molecule originally produced as a tricistronic rRNA transcript that contains the Small SubUnit (SSU) rRNA, the 5.8S rRNA, and the Large SubUnit (LSU) rRNA, in that order, from 5' to 3' along the primary transcript. Primary ribosomal RNA transcripts with three genes, in this order, are produced in the nuclei of many eukaryotic species, including S. cerevisiae…
12	GO:0006021	0.0380103	inositol biosynthetic process	biological_process	The chemical reactions and pathways resulting in the formation of inositol, 1,2,3,4,5,6-cyclohexanehexol, a growth factor for animals and microorganisms. [CHEBI:24848, ISBN:0198547684]
12	GO:0010082	0.0380103	regulation of root meristem growth	biological_process	Any process involved in maintaining the size and shape of a root meristem. [GOC:tb]
12	GO:0015866	0.0380103	ADP transport	biological_process	The directed movement of ADP, adenosine diphosphate, into, out of or within a cell, or between cells, by means of some agent such as a transporter or pore. [GOC:ai]
12	GO:0018105	0.0380103	peptidyl-serine phosphorylation	biological_process	The phosphorylation of peptidyl-serine to form peptidyl-O-phospho-L-serine. [RESID:AA0037]
12	GO:0018209	0.0380103	peptidyl-serine modification	biological_process	The modification of peptidyl-serine. [GOC:go_curators]
12	GO:0019287	0.0380103	isopentenyl diphosphate biosynthetic process, mevalonate pathway	biological_process	The chemical reactions and pathways resulting in the formation of isopentenyl diphosphate, via the intermediate mevalonate. This pathway converts acetate, in the form of acetyl-CoA, to isopentenyl diphosphate (IPP), the fundamental unit in isoprenoid biosynthesis, through a series of mevalonate intermediates. [GOC:go_curators, MetaCyc:PWY-922]
12	GO:0031125	0.0380103	rRNA 3'-end processing	biological_process	Any process involved in forming the mature 3' end of an rRNA molecule. [GOC:mah]
12	GO:0035404	0.0380103	histone-serine phosphorylation	biological_process	The modification of histones by addition of a phosphate group to a serine residue. [GOC:bf]
12	GO:0043987	0.0380103	histone H3-S10 phosphorylation	biological_process	The modification of histone H3 by the addition of an phosphate group to a serine residue at position 10 of the histone. [GOC:jl]
12	GO:0051026	0.0380103	chiasma assembly	biological_process	The cell cycle process in which a connection between chromatids assembles, indicating where an exchange of homologous segments has taken place by the crossing-over of non-sister chromatids. [http://www.onelook.com]
12	GO:0060147	0.0380103	regulation of posttranscriptional gene silencing	biological_process	Any process that modulates the frequency, rate or extent of the inactivation of gene expression by a posttranscriptional mechanism. [GOC:dph]
12	GO:0080060	0.0380103	integument development	biological_process	The process whose specific outcome is the progression of the integument over time, from its formation to the mature structure. Integument is one of the layers of tissue that usually covers the ovule, enveloping the nucellus and forming the micropyle at the apex. [PMID:19054366, PO:0020021]
12	GO:0090357	0.0380103	regulation of tryptophan metabolic process	biological_process	Any process that modulates the frequency, rate or extent of the chemical reactions and pathways involving tryptophan, the chiral amino acid 2-amino-3-(1H-indol-3-yl)propanoic acid. [GOC:tb]
12	GO:0007131	0.0381569	reciprocal meiotic recombination	biological_process	The cell cycle process in which double strand breaks are formed and repaired through a double Holliday junction intermediate. This results in the equal exchange of genetic material between non-sister chromatids in a pair of homologous chromosomes. These reciprocal recombinant products ensure the proper segregation of homologous chromosomes during meiosis I and create genetic diversity. [PMID:2087…
12	GO:0035825	0.0381569	reciprocal DNA recombination	biological_process	A DNA recombination process that results in the equal exchange of genetic material between the recombining DNA molecules. [GOC:mah, PMID:11139492, PMID:17304215]
12	GO:0044711	0.0385361	single-organism biosynthetic process	biological_process	A biosynthetic process - chemical reactions and pathways resulting in the formation of substances - involving a single organism. [GOC:jl]
12	GO:0034622	0.0386579	cellular macromolecular complex assembly	biological_process	The aggregation, arrangement and bonding together of a set of macromolecules to form a complex, carried out at the cellular level. [GOC:mah]
12	GO:0016572	0.0406901	histone phosphorylation	biological_process	The modification of histones by addition of phosphate groups. [GOC:ai]
12	GO:1901264	0.0411529	carbohydrate derivative transport	biological_process	The directed movement of a carbohydrate derivative into, out of or within a cell, or between cells, by means of some agent such as a transporter or pore. [GOC:bf, GOC:jl, GOC:TermGenie]
12	GO:0032535	0.0429057	regulation of cellular component size	biological_process	A process that modulates the size of a cellular component. [GOC:mah]
12	GO:0048467	0.0429057	gynoecium development	biological_process	The process whose specific outcome is the progression of the gynoecium over time, from its formation to the mature structure. The gynoecium is the collective name for the carpels of a flower. [GOC:go_curators, PO:0008062]
12	GO:0090066	0.0429057	regulation of anatomical structure size	biological_process	Any process that modulates the size of an anatomical structure. [GOC:dph, GOC:tb]
12	GO:0072330	0.0438082	monocarboxylic acid biosynthetic process	biological_process	The chemical reactions and pathways resulting in the formation of monocarboxylic acids, any organic acid containing one carboxyl (-COOH) group. [CHEBI:25384, GOC:mah]
12	GO:0009698	0.0448557	phenylpropanoid metabolic process	biological_process	The chemical reactions and pathways involving aromatic derivatives of trans-cinnamic acid. [GOC:jl]
12	GO:0071554	0.0454307	cell wall organization or biogenesis	biological_process	A process that results in the biosynthesis of constituent macromolecules, assembly, arrangement of constituent parts, or disassembly of a cell wall. [GOC:mah]
12	GO:0010332	0.0457277	response to gamma radiation	biological_process	Any process that results in a change in state or activity of a cell or an organism (in terms of movement, secretion, enzyme production, gene expression, etc.) as a result of a gamma radiation stimulus. Gamma radiation is a form of electromagnetic radiation (EMR) or light emission of a specific frequency produced from sub-atomic particle interaction, such as electron-positron annihilation and radi…
12	GO:0034754	0.046005	cellular hormone metabolic process	biological_process	The chemical reactions and pathways involving any hormone, naturally occurring substances secreted by specialized cells that affects the metabolism or behavior of other cells possessing functional receptors for the hormone, as carried out by individual cells. [GOC:mah]
12	GO:0046148	0.046107	pigment biosynthetic process	biological_process	The chemical reactions and pathways resulting in the formation of a pigment, any general or particular coloring matter in living organisms, e.g. melanin. [ISBN:0198506732]
12	GO:1901566	0.0462291	organonitrogen compound biosynthetic process	biological_process	The chemical reactions and pathways resulting in the formation of organonitrogen compound. [GOC:pr, GOC:TermGenie]
12	GO:0030154	0.0464759	cell differentiation	biological_process	The process in which relatively unspecialized cells, e.g. embryonic or regenerative cells, acquire specialized structural and/or functional features that characterize the cells, tissues, or organs of the mature organism or some other relatively stable phase of the organism's life history. Differentiation includes the processes involved in commitment of a cell to a specific fate and its subsequent…
12	GO:0010026	0.0468548	trichome differentiation	biological_process	The process in which a relatively unspecialized epidermal cell acquires the specialized features of a trichome cell. An example of this process is found in Arabidopsis thaliana. [GOC:mtg_sensu, PMID:9367433]
12	GO:0009913	0.0480374	epidermal cell differentiation	biological_process	The process in which a relatively unspecialized cell acquires specialized features of an epidermal cell, any of the cells making up the epidermis. [GOC:dph, GOC:go_curators, GOC:mtg_sensu, GOC:sdb_2009, GOC:tb]
12	GO:0030855	0.0480374	epithelial cell differentiation	biological_process	The process in which a relatively unspecialized cell acquires specialized features of an epithelial cell, any of the cells making up an epithelium. [GOC:ecd, PMID:11839751]
12	GO:0060429	0.0480374	epithelium development	biological_process	The process whose specific outcome is the progression of an epithelium over time, from its formation to the mature structure. An epithelium is a tissue that covers the internal or external surfaces of an anatomical structure. [GOC:dph, GOC:mtg_lung]
12	GO:0009790	0.0481221	embryo development	biological_process	The process whose specific outcome is the progression of an embryo from its formation until the end of its embryonic life stage. The end of the embryonic stage is organism-specific. For example, for mammals, the process would begin with zygote formation and end with birth. For insects, the process would begin at zygote formation and end with larval hatching. For plant zygotic embryos, this would …
12	GO:0016128	0.0487852	phytosteroid metabolic process	biological_process	The chemical reactions and pathways involving phytosteroids, steroids of higher plants that differ from animal steroids in having substitutions at C24 and/or a double bond at C22. Phytosteroids are so named because they occur in higher plants; some, notably ergosterol, are also found in fungi. [GOC:mah, ISBN:0198547684]
12	GO:0016129	0.0487852	phytosteroid biosynthetic process	biological_process	The chemical reactions and pathways resulting in the formation of phytosteroids, steroids that differ from animal steroids in having substitutions at C24 and/or a double bond at C22. Phytosteroids are so named because they occur in higher plants; some, notably ergosterol, are also found in fungi. [GOC:go_curators, GOC:mah, ISBN:0471331309]
12	GO:0016131	0.0487852	brassinosteroid metabolic process	biological_process	The chemical reactions and pathways involving brassinosteroids, any of a group of steroid derivatives that occur at very low concentrations in plant tissues and may have hormone-like effects. [ISBN:0192801023]
12	GO:0016132	0.0487852	brassinosteroid biosynthetic process	biological_process	The chemical reactions and pathways resulting in the formation of brassinosteroids, any of a group of steroid derivatives that occur at very low concentrations in plant tissues and may have hormone-like effects. [ISBN:0192801023]
12	GO:0071669	0.0489028	plant-type cell wall organization or biogenesis	biological_process	A process that results in the biosynthesis of constituent macromolecules, assembly, arrangement of constituent parts, or disassembly of a cellulose- and pectin-containing cell wall. [GOC:ecd, GOC:mah]
12	GO:1901605	0.0491465	alpha-amino acid metabolic process	biological_process	The chemical reactions and pathways involving an alpha-amino acid. [GOC:TermGenie]
12	GO:0008544	0.0492851	epidermis development	biological_process	The process whose specific outcome is the progression of the epidermis over time, from its formation to the mature structure. The epidermis is the outer epithelial layer of a plant or animal, it may be a single layer that produces an extracellular material (e.g. the cuticle of arthropods) or a complex stratified squamous epithelium, as in the case of many vertebrate species. [GOC:go_curators, UBE…
12	GO:0042440	0.0492851	pigment metabolic process	biological_process	The chemical reactions and pathways involving pigment, any general or particular coloring matter in living organisms, e.g. melanin. [GOC:jl, ISBN:0198506732]
13	GO:0010075	4.59626e-07	regulation of meristem growth	biological_process	Any process involved in maintaining the size and shape of a meristem. [GOC:tb]
13	GO:0008361	1.43308e-05	regulation of cell size	biological_process	Any process that modulates the size of a cell. [GOC:go_curators]
13	GO:0000272	5.61081e-05	polysaccharide catabolic process	biological_process	The chemical reactions and pathways resulting in the breakdown of a polysaccharide, a polymer of many (typically more than 10) monosaccharide residues linked glycosidically. [CHEBI:18154, GOC:go_curators]
13	GO:0008356	6.12123e-05	asymmetric cell division	biological_process	The asymmetric division of cells to produce two daughter cells with different developmental potentials. It is of fundamental significance for the generation of cell diversity. [PMID:11672519]
13	GO:0048767	0.000137954	root hair elongation	biological_process	The process in which the root hair grows longer. [GOC:jid, PMID:12468740]
13	GO:0007169	0.00036557	transmembrane receptor protein tyrosine kinase signaling pathway	biological_process	A series of molecular signals initiated by the binding of an extracellular ligand to a receptor on the surface of the target cell where the receptor possesses tyrosine kinase activity, and ending with regulation of a downstream cellular process, e.g. transcription. [GOC:ceb, GOC:signaling]
13	GO:0009926	0.000406696	auxin polar transport	biological_process	The unidirectional movement of auxin in the stem from tip to base along the vector of gravity or basipetally. [GOC:sm]
13	GO:0010050	0.000450986	vegetative phase change	biological_process	Any process involved in the transition of a plant from a juvenile phase of vegetative development to an adult phase of vegetative development. [GOC:tb]
13	GO:0010215	0.000595251	cellulose microfibril organization	biological_process	A process that is carried out at the cellular level which results in the assembly, arrangement of constituent parts, or disassembly of a cellulose microfibril, any of the cellulose structures laid down in orthogonal layers in a plant cell wall. [GOC:mah, PMID:12468730]
13	GO:0009825	0.000952116	multidimensional cell growth	biological_process	The process in which a cell irreversibly increases in size in two or three [spatial] dimensions or along two or three axes. [ISBN:0943088399]
13	GO:0043481	0.000952116	anthocyanin accumulation in tissues in response to UV light	biological_process	The aggregation of the pigment anthocyanin in a particular location in a tissue, occurring in response to a UV light stimulus. [GOC:jl]
13	GO:0048438	0.0021923	floral whorl development	biological_process	The process whose specific outcome is the progression of a floral whorl over time, from its formation to the mature structure. A floral whorl is a circular arrangement of parts of a flower arising from a stem of a plant. [GOC:dph, GOC:go_curators, GOC:PO_curators, GOC:tb, PO:0025023]
13	GO:0009832	0.00324427	plant-type cell wall biogenesis	biological_process	A cellular process that results in the biosynthesis of constituent macromolecules, assembly, and arrangement of constituent parts of a cellulose and pectin-containing cell wall. An example of this is found in Arabidopsis thaliana. [GOC:go_curators, GOC:lr, GOC:mtg_sensu]
13	GO:0071555	0.00403313	cell wall organization	biological_process	A process that results in the assembly, arrangement of constituent parts, or disassembly of the cell wall, the rigid or semi-rigid envelope lying outside the cell membrane of plant, fungal and most prokaryotic cells, maintaining their shape and protecting them from osmotic lysis. [GOC:mah]
13	GO:0005982	0.00459783	starch metabolic process	biological_process	The chemical reactions and pathways involving starch, the most important reserve polysaccharide in plants. It is a glucan consisting of two components, amylose and amylopectin, which are both glucose homopolymers. Starch is synthesized as a temporary storage form of carbon and can be catabolized to produce sucrose. [ISBN:0198506732]
13	GO:0003002	0.00734904	regionalization	biological_process	The pattern specification process that results in the subdivision of an axis or axes in space to define an area or volume in which specific patterns of cell differentiation will take place or in which cells interpret a specific environment. [GOC:dph, GOC:isa_complete]
13	GO:0009855	0.00801382	determination of bilateral symmetry	biological_process	The establishment of an organism's body plan or part of an organism with respect to a single longitudinal plane. The pattern can either be symmetric, such that the halves are mirror images, or asymmetric where the pattern deviates from this symmetry. [GOC:go_curators]
13	GO:0009932	0.00887308	cell tip growth	biological_process	Growth that occurs specifically at the tip of a cell. [GOC:jid]
13	GO:0030029	0.00928583	actin filament-based process	biological_process	Any cellular process that depends upon or alters the actin cytoskeleton, that part of the cytoskeleton comprising actin filaments and their associated proteins. [GOC:mah]
13	GO:0007389	0.00950502	pattern specification process	biological_process	Any developmental process that results in the creation of defined areas or spaces within an organism to which cells respond and eventually are instructed to differentiate. [GOC:go_curators, GOC:isa_complete, ISBN:0521436125]
13	GO:0048443	0.0134141	stamen development	biological_process	The process whose specific outcome is the progression of the stamen over time, from its formation to the mature structure. [GOC:go_curators]
13	GO:0048466	0.0134141	androecium development	biological_process	The process whose specific outcome is the progression of the androecium over time, from its formation to the mature structure. [GOC:go_curators]
13	GO:0010468	0.0138943	regulation of gene expression	biological_process	Any process that modulates the frequency, rate or extent of gene expression. Gene expression is the process in which a gene's coding sequence is converted into a mature gene product or products (proteins or RNA). This includes the production of an RNA transcript as well as any processing to produce a mature RNA product or an mRNA (for protein-coding genes) and the translation of that mRNA into pr…
13	GO:0010090	0.0141277	trichome morphogenesis	biological_process	The process in which the structures of a hair cell (trichome) cell are generated and organized. This process occurs while the initially relatively unspecialized epidermal cell is acquiring the specialized features of a hair cell. An example of this process is found in Arabidopsis thaliana. [GOC:mtg_sensu, GOC:tair_curators]
13	GO:0006110	0.0142309	regulation of glycolysis	biological_process	Any process that modulates the frequency, rate or extent of glycolysis. [GOC:go_curators]
13	GO:0010906	0.0142309	regulation of glucose metabolic process	biological_process	Any process that modulates the rate, frequency or extent of glucose metabolism. Glucose metabolic processes are the chemical reactions and pathways involving glucose, the aldohexose gluco-hexose. [GOC:BHF, GOC:tb]
13	GO:0031936	0.0142309	negative regulation of chromatin silencing	biological_process	Any process that stops, prevents, or reduces the frequency, rate or extent of chromatin silencing. [GOC:mah]
13	GO:0043470	0.0142309	regulation of carbohydrate catabolic process	biological_process	Any process that modulates the frequency, rate, or extent of the chemical reactions and pathways resulting in the breakdown of carbohydrates. [GOC:mlg]
13	GO:0043471	0.0142309	regulation of cellular carbohydrate catabolic process	biological_process	Any process that modulates the frequency, rate, or extent of the chemical reactions and pathways resulting in the breakdown of carbohydrates, carried out by individual cells. [GOC:jl]
13	GO:0045815	0.0142309	positive regulation of gene expression, epigenetic	biological_process	Any epigenetic process that activates or increases the rate of gene expression. [GOC:go_curators]
13	GO:0060969	0.0142309	negative regulation of gene silencing	biological_process	Any process that decreases the rate, frequency, or extent of gene silencing, the transcriptional or post-transcriptional process carried out at the cellular level that results in long-term gene inactivation. [GOC:dph, GOC:tb]
13	GO:0097359	0.0142309	UDP-glucosylation	biological_process	The covalent attachment of a UDP-glucose residue to a substrate molecule. [GOC:al]
13	GO:1901957	0.0142309	regulation of cutin biosynthetic process	biological_process	Any process that modulates the frequency, rate or extent of cutin biosynthetic process. [GOC:tb, GOC:TermGenie, PMID:23243127]
13	GO:1901959	0.0142309	positive regulation of cutin biosynthetic process	biological_process	Any process that activates or increases the frequency, rate or extent of cutin biosynthetic process. [GOC:tb, GOC:TermGenie, PMID:23243127]
13	GO:0009616	0.0152719	virus induced gene silencing	biological_process	Specific posttranscriptional gene inactivation ('silencing') both of viral gene(s), and host gene(s) homologous to the viral genes. This silencing is triggered by viral infection, and occurs through a specific decrease in the level of mRNA of both host and viral genes. [GOC:jl]
13	GO:0052018	0.0152719	modulation by symbiont of RNA levels in host	biological_process	The alteration by an organism of the levels of RNA in the host organism. The host is defined as the larger of the organisms involved in a symbiotic interaction. [GOC:mtg_pamgo_17jul06]
13	GO:0052249	0.0152719	modulation of RNA levels in other organism involved in symbiotic interaction	biological_process	The alteration by an organism of the levels of RNA in a second organism, where the two organisms are in a symbiotic interaction. [GOC:mtg_pamgo_17jul06]
13	GO:0010026	0.0180558	trichome differentiation	biological_process	The process in which a relatively unspecialized epidermal cell acquires the specialized features of a trichome cell. An example of this process is found in Arabidopsis thaliana. [GOC:mtg_sensu, PMID:9367433]
13	GO:0042335	0.0186437	cuticle development	biological_process	The chemical reactions and pathways resulting in the formation of a cuticle, the outer layer of some animals and plants, which acts to prevent water loss. [ISBN:0192800825]
13	GO:0010051	0.0188365	xylem and phloem pattern formation	biological_process	The regionalization process that gives rise to the patterning of the conducting tissues. An example of this process is found in Arabidopsis thaliana. [GOC:mtg_sensu, GOC:tb]
13	GO:0035821	0.0188365	modification of morphology or physiology of other organism	biological_process	The process in which an organism effects a change in the structure or processes of a second organism. [GOC:bf]
13	GO:0044003	0.0188365	modification by symbiont of host morphology or physiology	biological_process	The process in which an organism effects a change in the structure or processes of its host organism. The host is defined as the larger of the organisms involved in a symbiotic interaction. [GOC:cc]
13	GO:0051817	0.0188365	modification of morphology or physiology of other organism involved in symbiotic interaction	biological_process	The process in which an organism effects a change in the structure or processes of a second organism, where the two organisms are in a symbiotic interaction. [GOC:cc]
13	GO:0010267	0.0201186	production of ta-siRNAs involved in RNA interference	biological_process	Cleavage of double-stranded RNA to form trans-acting small interfering RNA molecules (siRNAs) of 21-23 nucleotides. ta-siRNAs arise from PolII genes and function like miRNAs to guide cleavage of target mRNAs. [GOC:tb, PMID:16129836]
13	GO:0000904	0.0212578	cell morphogenesis involved in differentiation	biological_process	The change in form (cell shape and size) that occurs when relatively unspecialized cells, e.g. embryonic or regenerative cells, acquire specialized structural and/or functional features that characterize the cells, tissues, or organs of the mature organism or some other relatively stable phase of the organism's life history. [GOC:go_curators]
13	GO:0009746	0.0246027	response to hexose stimulus	biological_process	Any process that results in a change in state or activity of a cell or an organism (in terms of movement, secretion, enzyme production, gene expression, etc.) as a result of a hexose stimulus. [GOC:jl]
13	GO:0034284	0.0256407	response to monosaccharide stimulus	biological_process	Any process that results in a change in state or activity of a cell or an organism (in terms of movement, secretion, enzyme production, gene expression, etc.) as a result of a monosaccharide stimulus. [GOC:mah]
13	GO:0044403	0.0272358	symbiosis, encompassing mutualism through parasitism	biological_process	An interaction between two organisms living together in more or less intimate association. The term host is usually used for the larger (macro) of the two members of a symbiosis. The smaller (micro) member is called the symbiont organism. Microscopic symbionts are often referred to as endosymbionts. The various forms of symbiosis include parasitism, in which the association is disadvantageous or …
13	GO:0051701	0.0272358	interaction with host	biological_process	An interaction between two organisms living together in more or less intimate association. The term host is used for the larger (macro) of the two members of a symbiosis; the various forms of symbiosis include parasitism, commensalism and mutualism. [GOC:cc]
13	GO:0000255	0.0282615	allantoin metabolic process	biological_process	The chemical reactions and pathways involving allantoin, (2,5-dioxo-4-imidazolidinyl)urea, an intermediate or end product of purine catabolism. [GOC:mah, ISBN:0198547684]
13	GO:0000256	0.0282615	allantoin catabolic process	biological_process	The chemical reactions and pathways resulting in the breakdown of allantoin, (2,5-dioxo-4-imidazolidinyl)urea. [GOC:mah, ISBN:0198547684]
13	GO:0006011	0.0282615	UDP-glucose metabolic process	biological_process	The chemical reactions and pathways involving UDP-glucose, uridinediphosphoglucose, a substance composed of glucose in glycosidic linkage with uridine diphosphate. [GOC:ai]
13	GO:0010052	0.0282615	guard cell differentiation	biological_process	The process in which a guard mother cell acquires the specialized features of a guard cell. [GOC:expert_db, GOC:tb]
13	GO:0010160	0.0282615	formation of organ boundary	biological_process	The regionalization process that specifies organ primordium boundaries resulting in a restriction of organogenesis to a limited spatial domain and keeping the organ separate from surrounding tissues. [GOC:dph, GOC:isa_complete, PMID:9611175]
13	GO:0010199	0.0282615	organ boundary specification between lateral organs and the meristem	biological_process	The process in which boundaries between lateral organs and the meristem is established and maintained. [PMID:12068116]
13	GO:0010441	0.0282615	guard cell development	biological_process	The process whose specific outcome is the progression of the guard cell over time, from its formation to the mature structure. [GOC:tb]
13	GO:0010442	0.0282615	guard cell morphogenesis	biological_process	Generation and organization of the polarized cell that is capable of turgor driven movement. [GOC:expert_db, GOC:tb]
13	GO:0010599	0.0282615	production of lsiRNA involved in RNA interference	biological_process	Cleavage of double-stranded RNA to form lsiRNA (long small interfering RNA), a class of siRNAs 30 to 40 nt in length. lsiRNAs are induced by pathogen infection or under specific growth conditions. [PMID:18003861]
13	GO:0015712	0.0282615	hexose phosphate transport	biological_process	The directed movement of hexose phosphate into, out of or within a cell, or between cells, by means of some agent such as a transporter or pore. [GOC:krc]
13	GO:0015760	0.0282615	glucose-6-phosphate transport	biological_process	The directed movement of glucose-6-phosphate into, out of or within a cell, or between cells, by means of some agent such as a transporter or pore. Glucose-6-phosphate is a monophosphorylated derivative of glucose with the phosphate group attached to C-6. [GOC:ai]
13	GO:0042754	0.0282615	negative regulation of circadian rhythm	biological_process	Any process that stops, prevents, or reduces the frequency, rate or extent of a circadian rhythm behavior. [GOC:go_curators]
13	GO:0043605	0.0282615	cellular amide catabolic process	biological_process	The chemical reactions and pathways resulting in the breakdown of an amide, any derivative of an oxoacid in which an acidic hydroxy group has been replaced by an amino or substituted amino group. [CHEBI:32988]
13	GO:0048859	0.0282615	formation of anatomical boundary	biological_process	The process in which the limits of an anatomical structure are generated. An anatomical structure is any biological entity that occupies space and is distinguished from its surroundings. Anatomical structures can be macroscopic such as a carpel, or microscopic such as an acrosome. [GO_REF:0000021, GOC:mtg_15jun06]
13	GO:0080060	0.0282615	integument development	biological_process	The process whose specific outcome is the progression of the integument over time, from its formation to the mature structure. Integument is one of the layers of tissue that usually covers the ovule, enveloping the nucellus and forming the micropyle at the apex. [PMID:19054366, PO:0020021]
13	GO:0090436	0.0282615	leaf pavement cell development	biological_process	The process whose specific outcome is the progression of an leaf pavement cell over time, from its formation to the mature structure. Cell development does not include the steps involved in committing a cell to a leaf pavement cell fate. [GOC:tb]
13	GO:0044419	0.0288004	interspecies interaction between organisms	biological_process	Any process in which an organism has an effect on an organism of a different species. [GOC:cc]
13	GO:0006084	0.030412	acetyl-CoA metabolic process	biological_process	The chemical reactions and pathways involving acetyl-CoA, a derivative of coenzyme A in which the sulfhydryl group is acetylated; it is a metabolite derived from several pathways (e.g. glycolysis, fatty acid oxidation, amino-acid catabolism) and is further metabolized by the tricarboxylic acid cycle. It is a key intermediate in lipid and terpenoid biosynthesis. [ISBN:0198547684]
13	GO:0040029	0.0314014	regulation of gene expression, epigenetic	biological_process	Any process that modulates the frequency, rate or extent of gene expression; the process is mitotically or meiotically heritable, or is stably self-propagated in the cytoplasm of a resting cell, and does not entail a change in DNA sequence. [PMID:10521337, PMID:11498582]
13	GO:0006637	0.0320703	acyl-CoA metabolic process	biological_process	The chemical reactions and pathways involving acyl-CoA, any derivative of coenzyme A in which the sulfhydryl group is in thiolester linkage with an acyl group. [ISBN:0198506732]
13	GO:0035383	0.0320703	thioester metabolic process	biological_process	The chemical reactions and pathways involving a thioester, a compound of general formula RC(=O)SR' in which the linking oxygen in an ester is replaced by a sulfur atom. They are the product of esterification between a carboxylic acid and a thiol. [CHEBI:51277, GOC:bf, http://encyclopedia.thefreedictionary.com/Thioester]
13	GO:0009808	0.0322243	lignin metabolic process	biological_process	The chemical reactions and pathways involving lignins, a class of polymers of phenylpropanoid units. [GOC:lr, GOC:yl]
13	GO:0035196	0.0337753	production of miRNAs involved in gene silencing by miRNA	biological_process	Cleavage of stem-loop RNA precursors into microRNAs (miRNAs), a class of small RNAs that primarily silence genes by blocking the translation of mRNA transcripts into protein. [GOC:dph, GOC:tb, PMID:15066275, PMID:15066283]
13	GO:0006928	0.0352923	cellular component movement	biological_process	The directed, self-propelled movement of a cellular component without the involvement of an external agent such as a transporter or a pore. [GOC:dgh, GOC:dph, GOC:jl, GOC:mlg]
13	GO:0030048	0.0352923	actin filament-based movement	biological_process	Movement of organelles or other particles along actin filaments, or sliding of actin filaments past each other, mediated by motor proteins. [GOC:BHF, GOC:mah]
13	GO:0060255	0.0370208	regulation of macromolecule metabolic process	biological_process	Any process that modulates the frequency, rate or extent of the chemical reactions and pathways involving macromolecules, any molecule of high relative molecular mass, the structure of which essentially comprises the multiple repetition of units derived, actually or conceptually, from molecules of low relative molecular mass. [GOC:dph, GOC:tb]
13	GO:0030422	0.0391678	production of siRNA involved in RNA interference	biological_process	Cleavage of double-stranded RNA to form small interfering RNA molecules (siRNAs) of 21-23 nucleotides, in the context of RNA interference. [GOC:mah, PMID:11524674]
13	GO:0009643	0.0420946	photosynthetic acclimation	biological_process	A response to light intensity in which exposure to medium-intensity light results in increased tolerance to high-intensity light. [GOC:mah, PMID:11069694]
13	GO:0010158	0.0420946	abaxial cell fate specification	biological_process	The process in which a cell becomes capable of differentiating autonomously into an abaxial cell in an environment that is neutral with respect to the developmental pathway; upon specification, the cell fate can be reversed. [GOC:mg]
13	GO:0015717	0.0420946	triose phosphate transport	biological_process	The directed movement of triose phosphate into, out of or within a cell, or between cells, by means of some agent such as a transporter or pore. [GOC:krc]
13	GO:0015988	0.0420946	energy coupled proton transmembrane transport, against electrochemical gradient	biological_process	The transport of protons across a membrane and against an electrochemical gradient, using energy from a source such as ATP hydrolysis, light, or electron transport. [GOC:mah]
13	GO:0015991	0.0420946	ATP hydrolysis coupled proton transport	biological_process	The transport of protons against an electrochemical gradient, using energy from ATP hydrolysis. [GOC:mah, GOC:vw]
13	GO:0031935	0.0420946	regulation of chromatin silencing	biological_process	Any process that affects the rate, extent or location of chromatin silencing. [GOC:mah]
13	GO:0035436	0.0420946	triose phosphate transmembrane transport	biological_process	The directed movement of triose phosphate across a membrane by means of some agent such as a transporter or pore. Triose phosphate is any organic three carbon compound phosphate ester. [GOC:bf, ISBN:0198506732]
13	GO:0000271	0.0421191	polysaccharide biosynthetic process	biological_process	The chemical reactions and pathways resulting in the formation of a polysaccharide, a polymer of many (typically more than 10) monosaccharide residues linked glycosidically. [CHEBI:18154, GOC:go_curators]
13	GO:0031050	0.0429918	dsRNA fragmentation	biological_process	Cleavage of double-stranded RNA molecules by an RNaseIII-family enzyme to produce small RNAs (generally 20-30 nucleotides, depending on species) with biological function. [GOC:ns]
13	GO:0035195	0.0429918	gene silencing by miRNA	biological_process	Downregulation of gene expression through the action of microRNAs (miRNAs), endogenous 21-24 nucleotide small RNAs processed from stem-loop RNA precursors (pre-miRNAs). Once incorporated into a RNA-induced silencing complex (RISC), miRNAs can downregulate gene expression by either of two posttranscriptional mechanisms: mRNA cleavage or translational repression. [PMID:14744438, PMID:15066275, PMID…
13	GO:0043331	0.0429918	response to dsRNA	biological_process	Any process that results in a change in state or activity of a cell or an organism (in terms of movement, secretion, enzyme production, gene expression, etc.) as a result of a double-stranded RNA stimulus. [GOC:jl]
13	GO:0070918	0.0429918	production of small RNA involved in gene silencing by RNA	biological_process	The process in which a double-stranded RNA precursor is processed into short (20-30 nt) fragments. RNA cleavage is catalyzed by a Dicer endonuclease. [GOC:mah, PMID:19239886]
13	GO:0071359	0.0429918	cellular response to dsRNA	biological_process	Any process that results in a change in state or activity of a cell (in terms of movement, secretion, enzyme production, gene expression, etc.) as a result of a double-stranded RNA stimulus. [GOC:mah]
13	GO:0009743	0.0454927	response to carbohydrate stimulus	biological_process	Any process that results in a change in state or activity of a cell or an organism (in terms of movement, secretion, enzyme production, gene expression, etc.) as a result of a carbohydrate stimulus. [GOC:jl]
13	GO:0016458	0.0454927	gene silencing	biological_process	Any transcriptional or post-transcriptional process carried out at the cellular level that results in long-term gene inactivation. [GOC:dph, GOC:jid, GOC:tb]
13	GO:0051607	0.0469964	defense response to virus	biological_process	Reactions triggered in response to the presence of a virus that act to protect the cell or organism. [GOC:ai]
13	GO:0009664	0.0473513	plant-type cell wall organization	biological_process	A process that results in the assembly and arrangement of constituent parts of the cellulose and pectin-containing cell wall, or in the disassembly of the cellulose and pectin-containing cell wall. This process is carried out at the cellular level. An example of this process is found in Arabidopsis thaliana. [GOC:jid, GOC:mtg_sensu]
13	GO:0010150	0.0486128	leaf senescence	biological_process	The process that occurs in a leaf near the end of its active life that is associated with the dismantling of cell components and membranes, loss of functional chloroplasts, and an overall decline in metabolism. [ISBN:0387987819]
13	GO:0009744	0.0488699	response to sucrose stimulus	biological_process	Any process that results in a change in state or activity of a cell or an organism (in terms of movement, secretion, enzyme production, gene expression, etc.) as a result of a sucrose stimulus. [GOC:jl]
13	GO:0034285	0.0488699	response to disaccharide stimulus	biological_process	Any process that results in a change in state or activity of a cell or an organism (in terms of movement, secretion, enzyme production, gene expression, etc.) as a result of a disaccharide stimulus. [GOC:sart]
14	GO:0010417	0.000387165	glucuronoxylan biosynthetic process	biological_process	The chemical reactions and pathways resulting in the formation of glucuronoxylan, a polymer containing a beta-1,4-linked D-xylose backbone substituted with glucuronic acid residues. [GOC:tair_curators]
14	GO:0055062	0.00176937	phosphate ion homeostasis	biological_process	Any process involved in the maintenance of an internal steady state of phosphate ions within an organism or cell. [GOC:jid, GOC:mah]
14	GO:0043405	0.00557333	regulation of MAP kinase activity	biological_process	Any process that modulates the frequency, rate or extent of MAP kinase activity. [GOC:dph, GOC:go_curators]
14	GO:0006323	0.00639739	DNA packaging	biological_process	Any process in which DNA and associated proteins are formed into a compact, orderly structure. [GOC:mah, ISBN:0815316194]
14	GO:0010389	0.00643663	regulation of G2/M transition of mitotic cell cycle	biological_process	Any process that modulates the rate or extent of progression from G2 phase to M phase of the mitotic cell cycle. [GOC:mtg_cell_cycle, PMID:17329565]
14	GO:0009202	0.00815478	deoxyribonucleoside triphosphate biosynthetic process	biological_process	The chemical reactions and pathways resulting in the formation of a deoxyribonucleoside triphosphate, a compound consisting of a nucleobase linked to a deoxyribose sugar esterified with triphosphate on the sugar. [GOC:go_curators, ISBN:0198506732]
14	GO:0010398	0.00815478	xylogalacturonan metabolic process	biological_process	The chemical reactions and pathways involving xylogalacturonan, a pectin characterized by a backbone of alpha-(1->4)-linked D-galacturonic acid residues substituted on C-3 with beta-D-xylopyranose residues. [GOC:tair_curators]
14	GO:0019593	0.00815478	mannitol biosynthetic process	biological_process	The chemical reactions and pathways resulting in the formation of mannitol, the alditol derived from D-mannose by reduction of the aldehyde group. [ISBN:0198506732]
14	GO:0042178	0.00815478	xenobiotic catabolic process	biological_process	The chemical reactions and pathways resulting in the breakdown of a xenobiotic compound, a compound foreign to living organisms. Used of chemical compounds, e.g. a xenobiotic chemical, such as a pesticide. [GOC:jl]
14	GO:0051052	0.00926762	regulation of DNA metabolic process	biological_process	Any process that modulates the frequency, rate or extent of the chemical reactions and pathways involving DNA. [GOC:ai]
14	GO:0000724	0.0147876	double-strand break repair via homologous recombination	biological_process	The error-free repair of a double-strand break in DNA in which the broken DNA molecule is repaired using homologous sequences. A strand in the broken DNA searches for a homologous region in an intact chromosome to serve as the template for DNA synthesis. The restoration of two intact DNA molecules results in the exchange, reciprocal or nonreciprocal, of genetic material between the intact DNA mol…
14	GO:0000725	0.0147876	recombinational repair	biological_process	A DNA repair process that involves the exchange, reciprocal or nonreciprocal, of genetic material between the broken DNA molecule and a homologous region of DNA. [GOC:elh]
14	GO:0006101	0.0162444	citrate metabolic process	biological_process	The chemical reactions and pathways involving citrate, 2-hydroxy-1,2,3-propanetricarboyxlate. Citrate is widely distributed in nature and is an important intermediate in the TCA cycle and the glyoxylate cycle. [ISBN:0198506732]
14	GO:0009268	0.0162444	response to pH	biological_process	Any process that results in a change in state or activity of a cell or an organism (in terms of movement, secretion, enzyme production, gene expression, etc.) as a result of a pH stimulus. [GOC:jl]
14	GO:0009432	0.0162444	SOS response	biological_process	An error-prone process for repairing damaged microbial DNA. [GOC:jl, PMID:16000023]
14	GO:0030002	0.0162444	cellular anion homeostasis	biological_process	Any process involved in the maintenance of an internal steady state of anions at the level of a cell. [GOC:ceb, GOC:mah]
14	GO:0030261	0.0162444	chromosome condensation	biological_process	The progressive compaction of dispersed interphase chromatin into threadlike chromosomes prior to mitotic or meiotic nuclear division, or during apoptosis, in eukaryotic cells. [GOC:mah, ISBN:0815316194]
14	GO:0030643	0.0162444	cellular phosphate ion homeostasis	biological_process	Any process involved in the maintenance of an internal steady state of phosphate ions at the level of a cell. [GOC:mah]
14	GO:0072502	0.0162444	cellular trivalent inorganic anion homeostasis	biological_process	Any process involved in the maintenance of an internal steady state of trivalent inorganic anions at the level of a cell. [GOC:mah]
14	GO:1900056	0.0162444	negative regulation of leaf senescence	biological_process	Any process that stops, prevents or reduces the frequency, rate or extent of leaf senescence. [GOC:TermGenie]
14	GO:0000105	0.0242692	histidine biosynthetic process	biological_process	The chemical reactions and pathways resulting in the formation of histidine, 2-amino-3-(1H-imidazol-4-yl)propanoic acid. [GOC:go_curators]
14	GO:0006547	0.0242692	histidine metabolic process	biological_process	The chemical reactions and pathways involving histidine, 2-amino-3-(1H-imidazol-4-yl)propanoic acid. [GOC:go_curators]
14	GO:0009075	0.0242692	histidine family amino acid metabolic process	biological_process	The chemical reactions and pathways involving amino acids of the histidine family. [GOC:ai]
14	GO:0009076	0.0242692	histidine family amino acid biosynthetic process	biological_process	The chemical reactions and pathways resulting in the formation of amino acids of the histidine family. [GOC:ai]
14	GO:0010117	0.0242692	photoprotection	biological_process	Protection mechanism used by plants under conditions of excess energy absorption as a consequence of the light reactions of photosynthesis. [GOC:mg]
14	GO:0052803	0.0242692	imidazole-containing compound metabolic process	biological_process	The chemical reactions and pathways involving imidazoles, five-membered organic heterocycle containing two nitrogen atoms at positions 1 and 3, or any of its derivatives; compounds containing an imidazole skeleton. [CHEBI:24780]
14	GO:1900055	0.0242692	regulation of leaf senescence	biological_process	Any process that modulates the frequency, rate or extent of leaf senescence. [GOC:TermGenie]
14	GO:0006302	0.026078	double-strand break repair	biological_process	The repair of double-strand breaks in DNA via homologous and nonhomologous mechanisms to reform a continuous DNA helix. [GOC:elh]
14	GO:0006310	0.0261744	DNA recombination	biological_process	Any process in which a new genotype is formed by reassortment of genes resulting in gene combinations different from those that were present in the parents. In eukaryotes genetic recombination can occur by chromosome assortment, intrachromosomal recombination, or nonreciprocal interchromosomal recombination. Intrachromosomal recombination occurs by crossing over. In bacteria it may occur by genet…
14	GO:0008283	0.0266864	cell proliferation	biological_process	The multiplication or reproduction of cells, resulting in the expansion of a cell population. [GOC:mah, GOC:mb]
14	GO:0006281	0.0279228	DNA repair	biological_process	The process of restoring DNA after damage. Genomes are subject to damage by chemical and physical agents in the environment (e.g. UV and ionizing radiations, chemical mutagens, fungal and bacterial toxins, etc.) and by free radicals or alkylating agents endogenously generated in metabolism. DNA is also damaged because of errors during its replication. A variety of different DNA repair pathways ha…
14	GO:0006275	0.0316031	regulation of DNA replication	biological_process	Any process that modulates the frequency, rate or extent of DNA replication. [GOC:go_curators]
14	GO:0006102	0.0322299	isocitrate metabolic process	biological_process	The chemical reactions and pathways involving isocitrate, the anion of isocitric acid, 1-hydroxy-1,2,3-propanetricarboxylic acid. Isocitrate is an important intermediate in the TCA cycle and the glycoxylate cycle. [ISBN:0198506732]
14	GO:0015860	0.0322299	purine nucleoside transmembrane transport	biological_process	The directed movement of a purine nucleoside across a membrane. A purine nucleoside is a purine base covalently bonded to a ribose or deoxyribose sugar. [GOC:ai, GOC:vw]
14	GO:0015867	0.0322299	ATP transport	biological_process	The directed movement of ATP, adenosine triphosphate, into, out of or within a cell, or between cells, by means of some agent such as a transporter or pore. [GOC:ai]
14	GO:0072350	0.0322299	tricarboxylic acid metabolic process	biological_process	The chemical reactions and pathways involving dicarboxylic acids, any organic acid containing three carboxyl (COOH) groups or anions (COO-). [CHEBI:27093, GOC:mah]
14	GO:1901642	0.0322299	nucleoside transmembrane transport	biological_process	The directed movement of nucleoside across a membrane. [GOC:pr, GOC:TermGenie]
14	GO:0006094	0.037579	gluconeogenesis	biological_process	The formation of glucose from noncarbohydrate precursors, such as pyruvate, amino acids and glycerol. [MetaCyc:GLUCONEO-PWY]
14	GO:0006974	0.037579	response to DNA damage stimulus	biological_process	Any process that results in a change in state or activity of a cell (in terms of movement, secretion, enzyme production, gene expression, etc.) as a result of a stimulus indicating damage to its DNA from environmental insults or errors during metabolism. [GOC:go_curators]
14	GO:0006260	0.0383591	DNA replication	biological_process	The cellular metabolic process in which a cell duplicates one or more molecules of DNA. DNA replication begins when specific sequences, known as origins of replication, are recognized and bound by initiation proteins, and ends when the original DNA molecule has been completely duplicated and the copies topologically separated. The unit of replication usually corresponds to the genome of the cell,…
14	GO:0071897	0.0383591	DNA biosynthetic process	biological_process	The cellular DNA metabolic process resulting in the formation of DNA, deoxyribonucleic acid, one of the two main types of nucleic acid, consisting of a long unbranched macromolecule formed from one or two strands of linked deoxyribonucleotides, the 3'-phosphate group of each constituent deoxyribonucleotide being joined in 3',5'-phosphodiester linkage to the 5'-hydroxyl group of the deoxyribose mo…
14	GO:0019319	0.0396914	hexose biosynthetic process	biological_process	The chemical reactions and pathways resulting in the formation of hexose, any monosaccharide with a chain of six carbon atoms in the molecule. [ISBN:0198506732]
14	GO:0007131	0.039881	reciprocal meiotic recombination	biological_process	The cell cycle process in which double strand breaks are formed and repaired through a double Holliday junction intermediate. This results in the equal exchange of genetic material between non-sister chromatids in a pair of homologous chromosomes. These reciprocal recombinant products ensure the proper segregation of homologous chromosomes during meiosis I and create genetic diversity. [PMID:2087…
14	GO:0035825	0.039881	reciprocal DNA recombination	biological_process	A DNA recombination process that results in the equal exchange of genetic material between the recombining DNA molecules. [GOC:mah, PMID:11139492, PMID:17304215]
14	GO:0005986	0.0401269	sucrose biosynthetic process	biological_process	The chemical reactions and pathways resulting in the formation of sucrose, the disaccharide fructofuranosyl-glucopyranoside. [GOC:go_curators]
14	GO:0007140	0.0401269	male meiosis	biological_process	A cell cycle process comprising the steps by which a cell progresses through the nuclear division phase of a meiotic cell cycle in the male germline. [GOC:dph, GOC:mah]
14	GO:0010206	0.0401269	photosystem II repair	biological_process	Proteolysis of the damaged D1 protein and re-assembly of a new D1 subunit in the photosystem II following photoinhibition. [GOC:sm]
14	GO:0010325	0.0401269	raffinose family oligosaccharide biosynthetic process	biological_process	The chemical reactions and pathways resulting in the formation of raffinose family oligosaccharides (RFOs, such as raffinose, stachyose, verbascose and other molecules with a higher degree of galactosyl polymerization). [GOC:tair_curators]
14	GO:0015868	0.0401269	purine ribonucleotide transport	biological_process	The directed movement of a purine ribonucleotide, any compound consisting of a purine ribonucleoside (a purine organic base attached to a ribose sugar) esterified with (ortho)phosphate, into, out of or within a cell. [GOC:ai]
14	GO:0030091	0.0401269	protein repair	biological_process	The process of restoring a protein to its original state after damage by such things as oxidation or spontaneous decomposition of residues. [GOC:mlg]
14	GO:0051503	0.0401269	adenine nucleotide transport	biological_process	The directed movement of adenine nucleotides, ATP, ADP, and/or AMP, into, out of or within a cell, or between cells, by means of some agent such as a transporter or pore. [GOC:ai]
14	GO:0072530	0.0401269	purine-containing compound transmembrane transport	biological_process	The directed movement of a purine-containing compound across a membrane. A purine-containing compound is any compound that contains purine or a formal derivative thereof. [CHEBI:26401, GOC:mah]
14	GO:0007127	0.0417651	meiosis I	biological_process	A cell cycle process comprising the steps by which a cell progresses through the first phase of meiosis, in which cells divide and homologous chromosomes are paired and segregated from each other, producing two daughter cells. [GOC:dph, GOC:mah, PMID:9334324]
14	GO:0046364	0.0475516	monosaccharide biosynthetic process	biological_process	The chemical reactions and pathways resulting in the formation of monosaccharides, polyhydric alcohols containing either an aldehyde or a keto group and between three to ten or more carbon atoms. [ISBN:0198506732]
14	GO:0015858	0.0479607	nucleoside transport	biological_process	The directed movement of a nucleoside, a nucleobase linked to either beta-D-ribofuranose (ribonucleoside) or 2-deoxy-beta-D-ribofuranose, (a deoxyribonucleotide), into, out of or within a cell, or between cells, by means of some agent such as a transporter or pore. [GOC:ai]
15	GO:0007005	0.000731622	mitochondrion organization	biological_process	A process that is carried out at the cellular level which results in the assembly, arrangement of constituent parts, or disassembly of a mitochondrion; includes mitochondrial morphogenesis and distribution, and replication of the mitochondrial genome as well as synthesis of new mitochondrial components. [GOC:dph, GOC:jl, GOC:mah, GOC:sgd_curators, PMID:9786946]
15	GO:0006760	0.00473632	folic acid-containing compound metabolic process	biological_process	The chemical reactions and pathways involving a folic acid-containing compound, i.e. any of a group of heterocyclic compounds based on the pteroic acid skeleton conjugated with one or more L-glutamic acid or L-glutamate units. [CHEBI:37445, GOC:ai, GOC:mah]
15	GO:0010229	0.00748026	inflorescence development	biological_process	The process whose specific outcome is the progression of an inflorescence over time, from its formation to the mature structure. [GOC:tb]
15	GO:0009944	0.00801222	polarity specification of adaxial/abaxial axis	biological_process	The process resulting in the establishment of polarity along the adaxial/abaxial axis. Adaxial refers to being situated toward an axis of an anatomical structure. Abaxial refers to being situated away from an axis of an anatomical structure. [GOC:dph, GOC:tb]
15	GO:0006796	0.00845758	phosphate-containing compound metabolic process	biological_process	The chemical reactions and pathways involving the phosphate group, the anion or salt of any phosphoric acid. [GOC:ai]
15	GO:0048609	0.00896812	multicellular organismal reproductive process	biological_process	The process, occurring above the cellular level, that is pertinent to the reproductive function of a multicellular organism. This includes the integrated processes at the level of tissues and organs. [GOC:dph, GOC:jid, GOC:tb]
15	GO:0032875	0.00906323	regulation of DNA endoreduplication	biological_process	Any process that modulates the frequency, rate or extent of DNA endoreduplication. [GOC:mah]
15	GO:0051510	0.0112265	regulation of unidimensional cell growth	biological_process	Any process that modulates the frequency, rate or extent of unidimensional cell growth, the process in which a cell irreversibly increases in size in one [spatial] dimension or along one axis. [GOC:ai]
15	GO:0044702	0.0113687	single organism reproductive process	biological_process	A biological process that directly contributes to the process of producing new individuals, involving a single organism. [GOC:jl]
15	GO:0010154	0.0115261	fruit development	biological_process	The process whose specific outcome is the progression of the fruit over time, from its formation to the mature structure. The fruit is a reproductive body of a seed plant. [GOC:sm]
15	GO:0022604	0.0121302	regulation of cell morphogenesis	biological_process	Any process that modulates the frequency, rate or extent of cell morphogenesis. Cell morphogenesis is the developmental process in which the shape of a cell is generated and organized. [GOC:isa_complete]
15	GO:0010162	0.0122226	seed dormancy process	biological_process	A dormancy process in which dormancy (sometimes called a dormant state) is induced, maintained or broken in a seed. Seed dormancy is a suspension of most physiological activity and growth in a seed, including the embryo contained therein, that can be reactivated. It often requires special conditions for reactivation, such as specific temperature, scarification, or leaching of inhibitors. [GOC:lr,…
15	GO:0022611	0.0122226	dormancy process	biological_process	A developmental process in which dormancy (sometimes called a dormant state) is induced, maintained or broken. Dormancy is a suspension of most physiological activity and growth that can be reactivated. [GOC:isa_complete, GOC:PO_curators, PO_REF:00009]
15	GO:0006184	0.0130746	GTP catabolic process	biological_process	The chemical reactions and pathways resulting in the breakdown of GTP, guanosine triphosphate. [ISBN:0198506732]
15	GO:0046039	0.0130746	GTP metabolic process	biological_process	The chemical reactions and pathways involving GTP, guanosine triphosphate. [GOC:go_curators]
15	GO:1901069	0.0130746	guanosine-containing compound catabolic process	biological_process	The chemical reactions and pathways resulting in the breakdown of guanosine-containing compounds (guanosines). [GOC:TermGenie]
15	GO:0000072	0.0134314	M phase specific microtubule process	biological_process	A microtubule-based process that occurs only during M phase of the cell cycle. [GOC:mah]
15	GO:0000279	0.0134314	M phase	biological_process	A cell cycle process comprising the steps by which a cell progresses through M phase, the part of the cell cycle comprising nuclear division. [GOC:dph, GOC:mah, ISBN:0815316194]
15	GO:0000733	0.0134314	DNA strand renaturation	biological_process	The identification and annealing of complementary base pairs in single-strand DNA. [GOC:elh]
15	GO:0000957	0.0134314	mitochondrial RNA catabolic process	biological_process	The chemical reactions and pathways resulting in the breakdown of RNA transcribed from the mitochondrial genome and occurring in the mitochondrion. [GOC:krc, GOC:mah]
15	GO:0000963	0.0134314	mitochondrial RNA processing	biological_process	The conversion of a primary RNA molecule transcribed from a mitochondrial genome into one or more mature RNA molecules; occurs in the mitochondrion. [GOC:krc, GOC:mah]
15	GO:0006029	0.0134314	proteoglycan metabolic process	biological_process	The chemical reactions and pathways involving proteoglycans, any glycoprotein in which the carbohydrate units are glycosaminoglycans. [GOC:mah, ISBN:0198506732]
15	GO:0006493	0.0134314	protein O-linked glycosylation	biological_process	A protein glycosylation process in which a carbohydrate or carbohydrate derivative unit is added to a protein via the hydroxyl group of peptidyl-serine, peptidyl-threonine, peptidyl-hydroxylysine, or peptidyl-hydroxyproline, or via the phenol group of peptidyl-tyrosine, forming an O-glycan. [GOC:pr, ISBN:0879695595, RESID:AA0153, RESID:AA0154, RESID:AA0155, RESID:AA0157, RESID:AA0212]
15	GO:0010159	0.0134314	specification of organ position	biological_process	The regionalization process in which information that determines the correct position at which organ primordia are formed is generated and perceived resulting in correct positioning of the new organ. [PMID:9611175]
15	GO:0010358	0.0134314	leaf shaping	biological_process	The developmental process that pertains to the organization of a leaf in three-dimensional space once the structure has initially formed. [GOC:tb, PMID:16971475]
15	GO:0010384	0.0134314	cell wall proteoglycan metabolic process	biological_process	The chemical reactions and pathways involving cell wall peptidoglycan, a group of glycoproteins that consist of a core-protein backbone O-glycosylated by one or more complex carbohydrates. [GOC:tair_curators]
15	GO:0010404	0.0134314	cell wall hydroxyproline-rich glycoprotein metabolic process	biological_process	The chemical reactions and pathways involving a cell wall hydroxyproline-rich glycoprotein that consist of a core-protein backbone O-glycosylated by one or more complex carbohydrates. [GOC:tair_curators]
15	GO:0010405	0.0134314	arabinogalactan protein metabolic process	biological_process	The chemical reactions and pathways involving a cell wall arabinogalactan II glycoprotein, which is composed of a group of core protein of highly varying length and domain complexity. These are O-glycosylated at one or more hydroxyproline residues by arabinogalactan (AG) type II groups, which consist of (1->3)-beta-galactan and (1->6)-beta-linked galactan chains connected to each other by (1->3,1…
15	GO:0015729	0.0134314	oxaloacetate transport	biological_process	The directed movement of oxaloacetate, the anion of oxobutanedioic acid, into, out of or within a cell, or between cells, by means of some agent such as a transporter or pore. [GOC:krc]
15	GO:0015742	0.0134314	alpha-ketoglutarate transport	biological_process	The directed movement of alpha-ketoglutarate into, out of or within a cell, or between cells, by means of some agent such as a transporter or pore. [GOC:krc]
15	GO:0018258	0.0134314	protein O-linked glycosylation via hydroxyproline	biological_process	The glycosylation of proteins via 04 atom of hydroxyproline to form O4-glycosyl-L-hydroxyproline; the most common form is arabinofuranosyl-4-proline. [RESID:AA0212]
15	GO:0019322	0.0134314	pentose biosynthetic process	biological_process	The chemical reactions and pathways resulting in the formation of a pentose, any monosaccharide with a chain of five carbon atoms in the molecule. [ISBN:0198506732]
15	GO:0019567	0.0134314	arabinose biosynthetic process	biological_process	The chemical reactions and pathways resulting in the formation of arabinose, arabino-pentose. [GOC:ai]
15	GO:0036292	0.0134314	DNA rewinding	biological_process	The process in which interchain hydrogen bonds between two single-stranded DNA (ssDNA) are reformed to regenerate double-stranded DNA (dsDNA). ssDNA is often bound and stabilized by proteins such as replication protein A (RPA) to form ssDNA bubbles. The bubbles can be rewound by ATP-dependent motors to reform base pairs between strands and thus dsDNA. [PMID:21078962, PMID:22704558, PMID:22705370,…
15	GO:0042964	0.0134314	thioredoxin biosynthetic process	biological_process	The chemical reactions and pathways resulting in the formation of thioredoxin, a small disulfide-containing redox protein that serves as a general protein disulfide oxidoreductase. [GOC:go_curators]
15	GO:0043988	0.0134314	histone H3-S28 phosphorylation	biological_process	The modification of histone H3 by the addition of an phosphate group to a serine residue at position 28 of the histone. [GOC:jl]
15	GO:0046900	0.0134314	tetrahydrofolylpolyglutamate metabolic process	biological_process	The chemical reactions and pathways involving tetrahydrofolylpolyglutamate, a folate derivative comprising tetrahydrofolate attached to a chain of glutamate residues. [GOC:ai]
15	GO:0071423	0.0134314	malate transmembrane transport	biological_process	A process in which a malate ion is transported from one side of a membrane to the other by means of some agent such as a transporter or pore. [GOC:mah]
15	GO:0019321	0.0146094	pentose metabolic process	biological_process	The chemical reactions and pathways involving a pentose, any monosaccharide with a chain of five carbon atoms in the molecule. [ISBN:0198506732]
15	GO:0001558	0.0161544	regulation of cell growth	biological_process	Any process that modulates the frequency, rate, extent or direction of cell growth. [GOC:go_curators]
15	GO:1901068	0.0161544	guanosine-containing compound metabolic process	biological_process	The chemical reactions and pathways involving guanosine-containing compounds (guanosines). [GOC:TermGenie]
15	GO:0009933	0.016955	meristem structural organization	biological_process	Organization of a region of tissue in a plant that is composed of one or more undifferentiated cells capable of undergoing mitosis and differentiation, thereby effecting growth and development of a plant by giving rise to more meristem or specialized tissue. [GOC:sm, ISBN:0198547684]
15	GO:0048532	0.016955	anatomical structure arrangement	biological_process	The process that gives rise to the configuration of the constituent parts of an anatomical structure. This process pertains to the physical shaping of a rudimentary structure. Anatomical structures can be macroscopic such as a carpel, or microscopic such as an acrosome. [GOC:go_curators]
15	GO:0000338	0.0172638	protein deneddylation	biological_process	The removal of a ubiquitin-like protein of the NEDD8 type from a protein. [GOC:krc]
15	GO:0010388	0.0172638	cullin deneddylation	biological_process	The modification of cullins by removal of ubiquitin-like protein NEDD8 (RUB1). [PMID:17307927]
15	GO:0043414	0.0173012	macromolecule methylation	biological_process	The covalent attachment of a methyl residue to one or more monomeric units in a polypeptide, polynucleotide, polysaccharide, or other biological macromolecule. [GOC:go_curators]
15	GO:0009117	0.01767	nucleotide metabolic process	biological_process	The chemical reactions and pathways involving a nucleotide, a nucleoside that is esterified with (ortho)phosphate or an oligophosphate at any hydroxyl group on the glycose moiety; may be mono-, di- or triphosphate; this definition includes cyclic nucleotides (nucleoside cyclic phosphates). [GOC:ma]
15	GO:0006753	0.0182334	nucleoside phosphate metabolic process	biological_process	The chemical reactions and pathways involving any phosphorylated nucleoside. [GOC:mah]
15	GO:0043412	0.0183364	macromolecule modification	biological_process	The covalent alteration of one or more monomeric units in a polypeptide, polynucleotide, polysaccharide, or other biological macromolecule, resulting in a change in its properties. [GOC:go_curators]
15	GO:0010431	0.0186884	seed maturation	biological_process	A process in seed development that occurs after embryogenesis by which a quiescent state is established in a seed. Seed maturation is characterized by storage compound accumulation, acquisition of desiccation tolerance, growth arrest and the entry into a dormancy period of variable length that is broken upon germination. [PMID:16096971]
15	GO:0006325	0.019289	chromatin organization	biological_process	Any process that results in the specification, formation or maintenance of the physical structure of eukaryotic chromatin. [GOC:mah]
15	GO:0044267	0.0213615	cellular protein metabolic process	biological_process	The chemical reactions and pathways involving a specific protein, rather than of proteins in general, occurring at the level of an individual cell. Includes cellular protein modification. [GOC:jl]
15	GO:0051276	0.0216818	chromosome organization	biological_process	A process that is carried out at the cellular level that results in the assembly, arrangement of constituent parts, or disassembly of chromosomes, structures composed of a very long molecule of DNA and associated proteins that carries hereditary information. [GOC:ai, GOC:dph, GOC:jl, GOC:mah]
15	GO:0006626	0.0221195	protein targeting to mitochondrion	biological_process	The process of directing proteins towards and into the mitochondrion, usually mediated by mitochondrial proteins that recognize signals contained within the imported protein. [GOC:mcc, ISBN:0716731363]
15	GO:0070585	0.0221195	protein localization to mitochondrion	biological_process	A process in which a protein is transported to, or maintained in, a location within the mitochondrion. [GOC:ecd]
15	GO:0072655	0.0221195	establishment of protein localization to mitochondrion	biological_process	The directed movement of a protein to a specific location in the mitochondrion. [GOC:mah]
15	GO:0055086	0.0222334	nucleobase-containing small molecule metabolic process	biological_process	The cellular chemical reactions and pathways involving a nucleobase-containing small molecule: a nucleobase, a nucleoside, or a nucleotide. [GOC:vw]
15	GO:0009914	0.0247988	hormone transport	biological_process	The directed movement of hormones into, out of or within a cell, or between cells, by means of some agent such as a transporter or pore. [GOC:tb]
15	GO:0060918	0.0247988	auxin transport	biological_process	The directed movement of auxin into, out of or within a cell, or between cells, by means of some agent such as a transporter or pore. [GOC:dph, GOC:tb]
15	GO:0048638	0.0259169	regulation of developmental growth	biological_process	Any process that modulates the frequency, rate or extent of developmental growth. [GOC:go_curators]
15	GO:0048316	0.0262333	seed development	biological_process	The process whose specific outcome is the progression of the seed over time, from its formation to the mature structure. A seed is a propagating organ formed in the sexual reproductive cycle of gymnosperms and angiosperms, consisting of a protective coat enclosing an embryo and food reserves. [GOC:jid, PO:0009010]
15	GO:0006101	0.0266845	citrate metabolic process	biological_process	The chemical reactions and pathways involving citrate, 2-hydroxy-1,2,3-propanetricarboyxlate. Citrate is widely distributed in nature and is an important intermediate in the TCA cycle and the glyoxylate cycle. [ISBN:0198506732]
15	GO:0009157	0.0266845	deoxyribonucleoside monophosphate biosynthetic process	biological_process	The chemical reactions and pathways resulting in the formation of a deoxyribonucleoside monophosphate, a compound consisting of a nucleobase linked to a deoxyribose sugar esterified with phosphate on the sugar. [GOC:go_curators, ISBN:0198506732]
15	GO:0009162	0.0266845	deoxyribonucleoside monophosphate metabolic process	biological_process	The chemical reactions and pathways involving a deoxyribonucleoside monophosphate, a compound consisting of a nucleobase linked to a deoxyribose sugar esterified with phosphate on the sugar. [GOC:go_curators, ISBN:0198506732]
15	GO:0009432	0.0266845	SOS response	biological_process	An error-prone process for repairing damaged microbial DNA. [GOC:jl, PMID:16000023]
15	GO:0010071	0.0266845	root meristem specification	biological_process	The specification of a meristem which will give rise to a primary or lateral root. [GOC:ascb_2009, GOC:dph, GOC:tb]
15	GO:0010450	0.0266845	inflorescence meristem growth	biological_process	The increase in size or mass of an inflorescence meristem, a population of undifferentiated cells in a plant shoot which produces small leaves and then floral meristems, which will give rise to flowers. [GOC:tb]
15	GO:0015743	0.0266845	malate transport	biological_process	The directed movement of malate into, out of or within a cell, or between cells, by means of some agent such as a transporter or pore. [GOC:krc]
15	GO:0018105	0.0266845	peptidyl-serine phosphorylation	biological_process	The phosphorylation of peptidyl-serine to form peptidyl-O-phospho-L-serine. [RESID:AA0037]
15	GO:0018209	0.0266845	peptidyl-serine modification	biological_process	The modification of peptidyl-serine. [GOC:go_curators]
15	GO:0019566	0.0266845	arabinose metabolic process	biological_process	The chemical reactions and pathways involving arabinose, arabino-pentose. L-Arabinose occurs both free, for example in the heartwood of many conifers, and in the combined state, as a constituent of plant hemicelluloses, bacterial polysaccharides etc. D-arabinose is a constituent of arabinonucleosides. [ISBN:0198506732]
15	GO:0019676	0.0266845	ammonia assimilation cycle	biological_process	The pathway by which ammonia is processed and incorporated into a cell. In an energy-rich (glucose-containing), nitrogen-poor environment, glutamine synthetase and glutamate synthase form an ammonia assimilatory cycle, in which ammonia is incorporated into L-glutamate to form L-glutamine, which then combines with alpha-ketoglutarate to regenerate L-glutamate. This ATP-dependent cycle is essential…
15	GO:0035404	0.0266845	histone-serine phosphorylation	biological_process	The modification of histones by addition of a phosphate group to a serine residue. [GOC:bf]
15	GO:0043987	0.0266845	histone H3-S10 phosphorylation	biological_process	The modification of histone H3 by the addition of an phosphate group to a serine residue at position 10 of the histone. [GOC:jl]
15	GO:0048826	0.0266845	cotyledon morphogenesis	biological_process	The process in which the anatomical structures of the cotyledon are generated and organized. The cotyledon is the modified leaf (seed leaf), found as part of the embryo in plant seeds. It is involved in either storage or absorption of food reserves. Dicotyledonous seeds contain two cotyledons, while monocotyledonous seeds contain only one. The cotyledons may appear above ground and show photosynt…
15	GO:0051131	0.0266845	chaperone-mediated protein complex assembly	biological_process	The aggregation, arrangement and bonding together of a set of components to form a protein complex, mediated by chaperone molecules that do not form part of the finished complex. [GOC:ai]
15	GO:0080086	0.0266845	stamen filament development	biological_process	The process whose specific outcome is the progression of the filament over time, from its formation to the mature structure. Filament is the stalk of a stamen. [PMID:19139039, PO:0009067]
15	GO:0032259	0.0272764	methylation	biological_process	The process in which a methyl group is covalently attached to a molecule. [GOC:mah]
15	GO:0048589	0.0272764	developmental growth	biological_process	The increase in size or mass of an entire organism, a part of an organism or a cell, where the increase in size or mass has the specific outcome of the progression of the organism over time from one condition to another. [GOC:go_curators]
15	GO:0019538	0.0274654	protein metabolic process	biological_process	The chemical reactions and pathways involving a specific protein, rather than of proteins in general. Includes protein modification. [GOC:ma]
15	GO:0016579	0.0289597	protein deubiquitination	biological_process	The removal of one or more ubiquitin groups from a protein. [GOC:ai]
15	GO:0009733	0.0309157	response to auxin stimulus	biological_process	Any process that results in a change in state or activity of a cell or an organism (in terms of movement, secretion, enzyme production, gene expression, etc.) as a result of an auxin stimulus. [GOC:jl]
15	GO:0001708	0.0317333	cell fate specification	biological_process	The process involved in the specification of cell identity. Once specification has taken place, a cell will be committed to differentiate down a specific pathway if left in its normal environment. [GOC:go_curators]
15	GO:0051302	0.0317333	regulation of cell division	biological_process	Any process that modulates the frequency, rate or extent of the physical partitioning and separation of a cell into daughter cells. [GOC:go_curators]
15	GO:0022603	0.0322297	regulation of anatomical structure morphogenesis	biological_process	Any process that modulates the frequency, rate or extent of anatomical structure morphogenesis. [GOC:mah]
15	GO:0040008	0.032708	regulation of growth	biological_process	Any process that modulates the frequency, rate or extent of the growth of all or part of an organism so that it occurs at its proper speed, either globally or in a specific part of the organism's development. [GOC:ems, GOC:mah]
15	GO:0040007	0.0331347	growth	biological_process	The increase in size or mass of an entire organism, a part of an organism or a cell. [GOC:bf, GOC:ma]
15	GO:0030029	0.0335043	actin filament-based process	biological_process	Any cellular process that depends upon or alters the actin cytoskeleton, that part of the cytoskeleton comprising actin filaments and their associated proteins. [GOC:mah]
15	GO:0009640	0.0346795	photomorphogenesis	biological_process	The control of plant growth, development, and differentiation by the duration and nature of light, independent of photosynthesis. [GOC:lr]
15	GO:0006464	0.0356843	cellular protein modification process	biological_process	The covalent alteration of one or more amino acids occurring in proteins, peptides and nascent polypeptides (co-translational, post-translational modifications) occurring at the level of an individual cell. Includes the modification of charged tRNAs that are destined to occur in a protein (pre-translation modification). [GOC:go_curators]
15	GO:0036211	0.0356843	protein modification process	biological_process	The covalent alteration of one or more amino acids occurring in proteins, peptides and nascent polypeptides (co-translational, post-translational modifications). Includes the modification of charged tRNAs that are destined to occur in a protein (pre-translation modification). [GOC:bf, GOC:jl]
15	GO:0007017	0.0374701	microtubule-based process	biological_process	Any cellular process that depends upon or alters the microtubule cytoskeleton, that part of the cytoskeleton comprising microtubules and their associated proteins. [GOC:mah]
15	GO:0008361	0.0375785	regulation of cell size	biological_process	Any process that modulates the size of a cell. [GOC:go_curators]
15	GO:0009225	0.0375785	nucleotide-sugar metabolic process	biological_process	The cellular chemical reactions and pathways involving nucleotide-sugars, any nucleotide in which the distal phosphoric residue of a nucleoside 5'-diphosphate is in glycosidic linkage with a monosaccharide or monosaccharide derivative. [ISBN:0198506732]
15	GO:0043648	0.0375785	dicarboxylic acid metabolic process	biological_process	The chemical reactions and pathways involving dicarboxylic acids, any organic acid containing two carboxyl (COOH) groups or anions (COO-). [ISBN:0198506732]
15	GO:0000266	0.0397617	mitochondrial fission	biological_process	The division of a mitochondrion within a cell to form two or more separate mitochondrial compartments. [PMID:11038192]
15	GO:0006541	0.0397617	glutamine metabolic process	biological_process	The chemical reactions and pathways involving glutamine, 2-amino-4-carbamoylbutanoic acid. [GOC:ai]
15	GO:0010158	0.0397617	abaxial cell fate specification	biological_process	The process in which a cell becomes capable of differentiating autonomously into an abaxial cell in an environment that is neutral with respect to the developmental pathway; upon specification, the cell fate can be reversed. [GOC:mg]
15	GO:0015813	0.0397617	L-glutamate transport	biological_process	The directed movement of L-glutamate, the L enantiomer anion of 2-aminopentanedioic acid, into, out of or within a cell, or between cells, by means of some agent such as a transporter or pore. [GOC:ai, GOC:dph, GOC:tb]
15	GO:0016570	0.040913	histone modification	biological_process	The covalent alteration of one or more amino acid residues within a histone protein. [GOC:krc]
15	GO:0046686	0.0431872	response to cadmium ion	biological_process	Any process that results in a change in state or activity of a cell or an organism (in terms of movement, secretion, enzyme production, gene expression, etc.) as a result of a cadmium (Cd) ion stimulus. [GOC:ai]
15	GO:0009826	0.0437226	unidimensional cell growth	biological_process	The process in which a cell irreversibly increases in size in one [spatial] dimension or along one axis, resulting in the morphogenesis of the cell. [ISBN:0943088399]
15	GO:0045165	0.0438003	cell fate commitment	biological_process	The commitment of cells to specific cell fates and their capacity to differentiate into particular kinds of cells. Positional information is established through protein signals that emanate from a localized source within a cell (the initial one-cell zygote) or within a developmental field. [ISBN:0716731185]
15	GO:0009165	0.0459388	nucleotide biosynthetic process	biological_process	The chemical reactions and pathways resulting in the formation of nucleotides, any nucleoside that is esterified with (ortho)phosphate or an oligophosphate at any hydroxyl group on the glycose moiety; may be mono-, di- or triphosphate; this definition includes cyclic-nucleotides (nucleoside cyclic phosphates). [GOC:go_curators]
15	GO:1901293	0.0470717	nucleoside phosphate biosynthetic process	biological_process	The chemical reactions and pathways resulting in the formation of a nucleoside phosphate. [GOC:TermGenie]
15	GO:0016571	0.0493875	histone methylation	biological_process	The modification of histones by addition of methyl groups. [GOC:ai]
16	GO:0006094	2.78714e-05	gluconeogenesis	biological_process	The formation of glucose from noncarbohydrate precursors, such as pyruvate, amino acids and glycerol. [MetaCyc:GLUCONEO-PWY]
16	GO:0009220	4.55115e-05	pyrimidine ribonucleotide biosynthetic process	biological_process	The chemical reactions and pathways resulting in the formation of a pyrimidine ribonucleotide, a compound consisting of nucleoside (a pyrimidine base linked to a ribose sugar) esterified with a phosphate group at either the 3' or 5'-hydroxyl group of the sugar. [GOC:go_curators, ISBN:0198506732]
16	GO:0046686	7.67667e-05	response to cadmium ion	biological_process	Any process that results in a change in state or activity of a cell or an organism (in terms of movement, secretion, enzyme production, gene expression, etc.) as a result of a cadmium (Cd) ion stimulus. [GOC:ai]
16	GO:0019761	0.000349588	glucosinolate biosynthetic process	biological_process	The chemical reactions and pathways resulting in the formation of glucosinolates, substituted thioglucosides found in rapeseed products and related cruciferae. [GOC:ai]
16	GO:0019344	0.000644219	cysteine biosynthetic process	biological_process	The chemical reactions and pathways resulting in the formation of cysteine, 2-amino-3-mercaptopropanoic acid. [GOC:go_curators]
16	GO:0001510	0.0009141	RNA methylation	biological_process	Posttranscriptional addition of a methyl group to either a nucleotide or 2'-O ribose in a polyribonucleotide. Usually uses S-adenosylmethionine as a cofactor. [GOC:hjd]
16	GO:0009154	0.00187068	purine ribonucleotide catabolic process	biological_process	The chemical reactions and pathways resulting in the breakdown of a purine ribonucleotide, a compound consisting of ribonucleoside (a purine base linked to a ribose sugar) esterified with a phosphate group at either the 3' or 5'-hydroxyl group of the sugar. [GOC:go_curators, ISBN:0198506732]
16	GO:0009207	0.00187068	purine ribonucleoside triphosphate catabolic process	biological_process	The chemical reactions and pathways resulting in the breakdown of purine ribonucleoside triphosphate, a compound consisting of a purine base linked to a ribose sugar esterified with triphosphate on the sugar. [GOC:go_curators, ISBN:0198506732]
16	GO:0046130	0.00205214	purine ribonucleoside catabolic process	biological_process	The chemical reactions and pathways resulting in the breakdown of any purine ribonucleoside, a nucleoside in which purine base is linked to a ribose (beta-D-ribofuranose) molecule. [GOC:ai]
16	GO:0019288	0.00293482	isopentenyl diphosphate biosynthetic process, mevalonate-independent pathway	biological_process	The chemical reactions and pathways resulting in the formation of isopentenyl diphosphate by the mevalonate-independent pathway. Isopentenyl diphosphate (IPP) is the fundamental unit in isoprenoid biosynthesis and is biosynthesized from pyruvate and glyceraldehyde 3-phosphate via intermediates, including 1-deoxy-D-xylulose 5-phosphate. [GOC:go_curators, MetaCyc:NONMEVIPP-PWY]
16	GO:0046835	0.00350369	carbohydrate phosphorylation	biological_process	The process of introducing a phosphate group into a carbohydrate, any organic compound based on the general formula Cx(H2O)y. [ISBN:0198506732]
16	GO:0006098	0.00435286	pentose-phosphate shunt	biological_process	The process in which glucose is oxidized, coupled to NADPH synthesis. Glucose 6-P is oxidized with the formation of carbon dioxide (CO2), ribulose 5-phosphate and reduced NADP; ribulose 5-P then enters a series of reactions interconverting sugar phosphates. The pentose phosphate pathway is a major source of reducing equivalents for biosynthesis reactions and is also important for the conversion o…
16	GO:0040034	0.00446564	regulation of development, heterochronic	biological_process	Any process that modulates the consistent predetermined time point at which an integrated living unit or organism progresses from an initial condition to a later condition and the rate at which this time point is reached. [PMID:9442909]
16	GO:0042401	0.00446564	cellular biogenic amine biosynthetic process	biological_process	The chemical reactions and pathways occurring at the level of individual cells resulting in the formation of any of a group of naturally occurring, biologically active amines, such as norepinephrine, histamine, and serotonin, many of which act as neurotransmitters. [GOC:jl, ISBN:0395825172]
16	GO:0009409	0.00515592	response to cold	biological_process	Any process that results in a change in state or activity of a cell or an organism (in terms of movement, secretion, enzyme production, gene expression, etc.) as a result of a cold stimulus, a temperature stimulus below the optimal temperature for that organism. [GOC:lr]
16	GO:0010498	0.00523764	proteasomal protein catabolic process	biological_process	The chemical reactions and pathways resulting in the breakdown of a protein or peptide by hydrolysis of its peptide bonds that is mediated by the proteasome. [GOC:tb]
16	GO:0009684	0.00544044	indoleacetic acid biosynthetic process	biological_process	The chemical reactions and pathways resulting in the formation of indole-3-acetic acid, a compound which functions as a growth regulator in plants. [ISBN:0387969845]
16	GO:0019321	0.00557244	pentose metabolic process	biological_process	The chemical reactions and pathways involving a pentose, any monosaccharide with a chain of five carbon atoms in the molecule. [ISBN:0198506732]
16	GO:0048513	0.0066347	organ development	biological_process	Development of a tissue or tissues that work together to perform a specific function or functions. Development pertains to the process whose specific outcome is the progression of a structure over time, from its formation to the mature structure. Organs are commonly observed as visibly distinct structures, but may also exist as loosely associated clusters of cells that work together to perform a …
16	GO:0006779	0.00710783	porphyrin-containing compound biosynthetic process	biological_process	The chemical reactions and pathways resulting in the formation of any member of a large group of derivatives or analogs of porphyrin. Porphyrin consists of a ring of four pyrrole nuclei linked each to the next at their alpha positions through a methine group. [GOC:jl, ISBN:0198506732]
16	GO:0016043	0.00772056	cellular component organization	biological_process	A process that results in the assembly, arrangement of constituent parts, or disassembly of a cellular component. [GOC:ai, GOC:jl, GOC:mah]
16	GO:0006096	0.00827266	glycolysis	biological_process	The chemical reactions and pathways resulting in the breakdown of a monosaccharide (generally glucose) into pyruvate, with the concomitant production of a small amount of ATP. Glycolysis begins with phosphorylation of a monosaccharide (generally glucose) on the sixth carbon by a hexokinase, and ends with the production of pyruvate. Pyruvate may be converted to ethanol, lactate, or other small mol…
16	GO:0009743	0.00997057	response to carbohydrate stimulus	biological_process	Any process that results in a change in state or activity of a cell or an organism (in terms of movement, secretion, enzyme production, gene expression, etc.) as a result of a carbohydrate stimulus. [GOC:jl]
16	GO:0019684	0.0101793	photosynthesis, light reaction	biological_process	The light reactions of photosynthesis, which take place in photosystems II and I. Light energy is harvested and used to power the transfer of electrons among a series of electron donors and acceptors. The final electron acceptor is NADP+, which is reduced to NADPH. NADPH generated from light reactions is used in sugar synthesis in dark reactions. Light reactions also generate a proton motive forc…
16	GO:0016036	0.0105239	cellular response to phosphate starvation	biological_process	Any process that results in a change in state or activity of a cell (in terms of movement, secretion, enzyme production, gene expression, etc.) as a result of deprivation of phosphate. [GOC:jl]
16	GO:0042254	0.0111045	ribosome biogenesis	biological_process	A cellular process that results in the biosynthesis of constituent macromolecules, assembly, and arrangement of constituent parts of ribosome subunits; includes transport to the sites of protein synthesis. [GOC:ma]
16	GO:0032879	0.0112998	regulation of localization	biological_process	Any process that modulates the frequency, rate or extent of any process in which a cell, a substance, or a cellular entity is transported to, or maintained in, a specific location. [GOC:mah]
16	GO:0006364	0.0121877	rRNA processing	biological_process	Any process involved in the conversion of a primary ribosomal RNA (rRNA) transcript into one or more mature rRNA molecules. [GOC:curators]
16	GO:0019374	0.0124321	galactolipid metabolic process	biological_process	The chemical reactions and pathways involving galactolipids, any glycolipid containing one of more residues of galactose and/or N-acetylgalactosamine. [ISBN:0198506732]
16	GO:0019375	0.0124321	galactolipid biosynthetic process	biological_process	The chemical reactions and pathways resulting in the formation of galactolipids, any glycolipid containing one of more residues of galactose and/or N-acetylgalactosamine. [ISBN:0198506732]
16	GO:0016072	0.0127332	rRNA metabolic process	biological_process	The chemical reactions and pathways involving rRNA, ribosomal RNA, a structural constituent of ribosomes. [ISBN:0198506732]
16	GO:0044767	0.0129825	single-organism developmental process	biological_process	A biological process whose specific outcome is the progression of an integrated living unit: an anatomical structure (which may be a subcellular structure, cell, tissue, or organ), or organism over time from an initial condition to a later condition, involving only one organism. [GOC:jl]
16	GO:0022613	0.0130461	ribonucleoprotein complex biogenesis	biological_process	A cellular process that results in the biosynthesis of constituent macromolecules, assembly, and arrangement of constituent parts of a complex containing RNA and proteins. Includes the biosynthesis of the constituent RNA and protein molecules, and those macromolecular modifications that are involved in synthesis or assembly of the ribonucleoprotein complex. [GOC:isa_complete, GOC:mah]
16	GO:0048367	0.0130515	shoot system development	biological_process	The process whose specific outcome is the progression of the shoot system over time, from its formation to the mature structure. [GOC:go_curators]
16	GO:0055082	0.0132517	cellular chemical homeostasis	biological_process	Any biological process involved in the maintenance of an internal steady state of a chemical at the level of the cell. [GOC:isa_complete, GOC:jid]
16	GO:0000162	0.0137843	tryptophan biosynthetic process	biological_process	The chemical reactions and pathways resulting in the formation of tryptophan, the chiral amino acid 2-amino-3-(1H-indol-3-yl)propanoic acid; tryptophan is synthesized from chorismate via anthranilate. [GOC:mah, ISBN:0471331309, MetaCyc:TRPSYN-PWY]
16	GO:0046219	0.0137843	indolalkylamine biosynthetic process	biological_process	The chemical reactions and pathways resulting in the formation of indolalkylamines, indole or indole derivatives containing a primary, secondary, or tertiary amine group. [CHEBI:38631, GOC:curators]
16	GO:0060284	0.0137843	regulation of cell development	biological_process	Any process that modulates the rate, frequency or extent of the progression of the cell over time, from its formation to the mature structure. Cell development does not include the steps involved in committing a cell to a specific fate. [GOC:dph, GOC:tb]
16	GO:0034660	0.0139534	ncRNA metabolic process	biological_process	The chemical reactions and pathways involving non-coding RNA transcripts (ncRNAs). [GOC:mah]
16	GO:0009247	0.0151512	glycolipid biosynthetic process	biological_process	The chemical reactions and pathways resulting in the formation of glycolipid, a class of 1,2-di-O-acylglycerols joined at oxygen 3 by a glycosidic linkage to a carbohydrate part (usually a mono-, di- or tri-saccharide). [CHEBI:33563, GOC:go_curators]
16	GO:0034599	0.0155277	cellular response to oxidative stress	biological_process	Any process that results in a change in state or activity of a cell (in terms of movement, secretion, enzyme production, gene expression, etc.) as a result of oxidative stress, a state often resulting from exposure to high levels of reactive oxygen species, e.g. superoxide anions, hydrogen peroxide (H2O2), and hydroxyl radicals. [GOC:mah]
16	GO:0009790	0.0156397	embryo development	biological_process	The process whose specific outcome is the progression of an embryo from its formation until the end of its embryonic life stage. The end of the embryonic stage is organism-specific. For example, for mammals, the process would begin with zygote formation and end with birth. For insects, the process would begin at zygote formation and end with larval hatching. For plant zygotic embryos, this would …
16	GO:1901701	0.0156689	cellular response to oxygen-containing compound	biological_process	Any process that results in a change in state or activity of a cell (in terms of movement, secretion, enzyme production, gene expression, etc.) as a result of an oxygen-containing compound stimulus. [GOC:pr, GOC:TermGenie]
16	GO:0001708	0.0177458	cell fate specification	biological_process	The process involved in the specification of cell identity. Once specification has taken place, a cell will be committed to differentiate down a specific pathway if left in its normal environment. [GOC:go_curators]
16	GO:0010043	0.0177458	response to zinc ion	biological_process	Any process that results in a change in state or activity of a cell or an organism (in terms of movement, secretion, enzyme production, gene expression, etc.) as a result of a zinc ion stimulus. [GOC:sm]
16	GO:0009746	0.0179286	response to hexose stimulus	biological_process	Any process that results in a change in state or activity of a cell or an organism (in terms of movement, secretion, enzyme production, gene expression, etc.) as a result of a hexose stimulus. [GOC:jl]
16	GO:0043623	0.0181501	cellular protein complex assembly	biological_process	The aggregation, arrangement and bonding together of a set of components to form a protein complex, occurring at the level of an individual cell. [GOC:jl]
16	GO:0009310	0.0182188	amine catabolic process	biological_process	The chemical reactions and pathways resulting in the breakdown of any organic compound that is weakly basic in character and contains an amino or a substituted amino group. Amines are called primary, secondary, or tertiary according to whether one, two, or three carbon atoms are attached to the nitrogen atom. [GOC:jl, ISBN:0198506732]
16	GO:0042402	0.0182188	cellular biogenic amine catabolic process	biological_process	The chemical reactions and pathways occurring at the level of individual cells resulting in the breakdown of biogenic amines, any of a group of naturally occurring, biologically active amines, such as norepinephrine, histamine, and serotonin, many of which act as neurotransmitters. [GOC:go_curators, GOC:jl, ISBN:0198506732]
16	GO:0034284	0.0189842	response to monosaccharide stimulus	biological_process	Any process that results in a change in state or activity of a cell or an organism (in terms of movement, secretion, enzyme production, gene expression, etc.) as a result of a monosaccharide stimulus. [GOC:mah]
16	GO:0006184	0.019887	GTP catabolic process	biological_process	The chemical reactions and pathways resulting in the breakdown of GTP, guanosine triphosphate. [ISBN:0198506732]
16	GO:0046039	0.019887	GTP metabolic process	biological_process	The chemical reactions and pathways involving GTP, guanosine triphosphate. [GOC:go_curators]
16	GO:1901069	0.019887	guanosine-containing compound catabolic process	biological_process	The chemical reactions and pathways resulting in the breakdown of guanosine-containing compounds (guanosines). [GOC:TermGenie]
16	GO:0034470	0.019996	ncRNA processing	biological_process	Any process that results in the conversion of one or more primary non-coding RNA (ncRNA) transcripts into one or more mature ncRNA molecules. [GOC:mah]
16	GO:0042742	0.0207798	defense response to bacterium	biological_process	Reactions triggered in response to the presence of a bacterium that act to protect the cell or organism. [GOC:jl]
16	GO:0048827	0.0211436	phyllome development	biological_process	The process whose specific outcome is the progression of a phyllome over time, from its formation to the mature structure. A phyllome is a collective term for all the different types of leaves appearing on plants. [GOC:devbiol, GOC:tb, PO:0006001]
16	GO:0006200	0.0215855	ATP catabolic process	biological_process	The chemical reactions and pathways resulting in the breakdown of ATP, adenosine 5'-triphosphate, a universally important coenzyme and enzyme regulator. [GOC:ai]
16	GO:0006664	0.0216464	glycolipid metabolic process	biological_process	The chemical reactions and pathways involving glycolipids, a class of 1,2-di-O-acylglycerols joined at oxygen 3 by a glycosidic linkage to a carbohydrate part (usually a mono-, di- or tri-saccharide). Some substances classified as bacterial glycolipids have the sugar group acylated by one or more fatty acids and the glycerol group may be absent. [CHEBI:33563, ISBN:0198547684]
16	GO:0042744	0.0216464	hydrogen peroxide catabolic process	biological_process	The chemical reactions and pathways resulting in the breakdown of hydrogen peroxide (H2O2). [GOC:jl]
16	GO:0006595	0.0227253	polyamine metabolic process	biological_process	The chemical reactions and pathways involving polyamines, any organic compound containing two or more amino groups. [ISBN:0198506732]
16	GO:0010187	0.0228108	negative regulation of seed germination	biological_process	Any process that stops, prevents, or reduces the frequency, rate or extent of seed germination. [GOC:tb]
16	GO:0048506	0.0228108	regulation of timing of meristematic phase transition	biological_process	Any process that modulates the rate, frequency or extent of a change in identity of a meristem at a characteristic predetermined time point. [GOC:dph, GOC:jid, GOC:tb]
16	GO:0048510	0.0228108	regulation of timing of transition from vegetative to reproductive phase	biological_process	The process controlling the point in time during development when a vegetative meristem will change its identity to become an inflorescence or floral meristem, and/or the rate at which the change occurs. [GOC:jid, PMID:8974397]
16	GO:0071822	0.0229515	protein complex subunit organization	biological_process	Any process in which macromolecules aggregate, disaggregate, or are modified, resulting in the formation, disassembly, or alteration of a protein complex. [GOC:mah]
16	GO:0019941	0.0232974	modification-dependent protein catabolic process	biological_process	The chemical reactions and pathways resulting in the breakdown of a protein or peptide by hydrolysis of its peptide bonds, initiated by the covalent modification of the target protein. [GOC:go_curators]
16	GO:0043632	0.0232974	modification-dependent macromolecule catabolic process	biological_process	The chemical reactions and pathways resulting in the breakdown of a macromolecule, initiated by covalent modification of the target molecule. [GOC:jl]
16	GO:0019725	0.0236308	cellular homeostasis	biological_process	Any process involved in the maintenance of an internal steady state at the level of the cell. [GOC:isa_complete, GOC:jl, ISBN:0395825172]
16	GO:0080129	0.0248858	proteasome core complex assembly	biological_process	The aggregation, arrangement and bonding together of a mature, active 20S proteasome core particle complex that does not contain any regulatory particles. [PMID:12401807, PMID:17971041]
16	GO:0006833	0.0249018	water transport	biological_process	The directed movement of water (H2O) into, out of or within a cell, or between cells, by means of some agent such as a transporter or pore. [GOC:ai]
16	GO:0042044	0.0249018	fluid transport	biological_process	The directed movement of substances that are in liquid form in normal living conditions into, out of or within a cell, or between cells, by means of some agent such as a transporter or pore. [GOC:ai]
16	GO:0006260	0.0250345	DNA replication	biological_process	The cellular metabolic process in which a cell duplicates one or more molecules of DNA. DNA replication begins when specific sequences, known as origins of replication, are recognized and bound by initiation proteins, and ends when the original DNA molecule has been completely duplicated and the copies topologically separated. The unit of replication usually corresponds to the genome of the cell,…
16	GO:0071897	0.0250345	DNA biosynthetic process	biological_process	The cellular DNA metabolic process resulting in the formation of DNA, deoxyribonucleic acid, one of the two main types of nucleic acid, consisting of a long unbranched macromolecule formed from one or two strands of linked deoxyribonucleotides, the 3'-phosphate group of each constituent deoxyribonucleotide being joined in 3',5'-phosphodiester linkage to the 5'-hydroxyl group of the deoxyribose mo…
16	GO:0070301	0.0254438	cellular response to hydrogen peroxide	biological_process	Any process that results in a change in state or activity of a cell (in terms of movement, secretion, enzyme production, gene expression, etc.) as a result of a hydrogen peroxide (H2O2) stimulus. [CHEBI:16240, GOC:mah]
16	GO:1901068	0.0254438	guanosine-containing compound metabolic process	biological_process	The chemical reactions and pathways involving guanosine-containing compounds (guanosines). [GOC:TermGenie]
16	GO:0034622	0.0260183	cellular macromolecular complex assembly	biological_process	The aggregation, arrangement and bonding together of a set of macromolecules to form a complex, carried out at the cellular level. [GOC:mah]
16	GO:0006420	0.0268628	arginyl-tRNA aminoacylation	biological_process	The process of coupling arginine to arginyl-tRNA, catalyzed by arginyl-tRNA synthetase. In tRNA aminoacylation, the amino acid is first activated by linkage to AMP and then transferred to either the 2'- or the 3'-hydroxyl group of the 3'-adenosine residue of the tRNA. [GOC:mcc, ISBN:0716730510]
16	GO:0006898	0.0268628	receptor-mediated endocytosis	biological_process	An endocytosis process in which cell surface receptors ensure specificity of transport. A specific receptor on the cell surface binds tightly to the extracellular macromolecule (the ligand) that it recognizes; the plasma-membrane region containing the receptor-ligand complex then undergoes endocytosis, forming a transport vesicle containing the receptor-ligand complex and excluding most other pla…
16	GO:0008272	0.0268628	sulfate transport	biological_process	The directed movement of sulfate into, out of or within a cell, or between cells, by means of some agent such as a transporter or pore. [GOC:krc]
16	GO:0009200	0.0268628	deoxyribonucleoside triphosphate metabolic process	biological_process	The chemical reactions and pathways involving a deoxyribonucleoside triphosphate, a compound consisting of a nucleobase linked to a deoxyribose sugar esterified with triphosphate on the sugar. [GOC:go_curators, ISBN:0198506732]
16	GO:0009202	0.0268628	deoxyribonucleoside triphosphate biosynthetic process	biological_process	The chemical reactions and pathways resulting in the formation of a deoxyribonucleoside triphosphate, a compound consisting of a nucleobase linked to a deoxyribose sugar esterified with triphosphate on the sugar. [GOC:go_curators, ISBN:0198506732]
16	GO:0009759	0.0268628	indole glucosinolate biosynthetic process	biological_process	The chemical reactions and pathways resulting in the formation of indole glucosinolates, sulfur-containing compounds that have a common structure linked to an R group derived from tryptophan. [GOC:ai]
16	GO:0010275	0.0268628	NAD(P)H dehydrogenase complex assembly	biological_process	The aggregation, arrangement and bonding together of a set of components to form NAD(P)H dehydrogenase complex, which is involved in electron transport from an unidentified electron donor, possibly NAD(P)H or ferredoxin(Fd) to the plastoquinone pool. [GOC:sm]
16	GO:0010358	0.0268628	leaf shaping	biological_process	The developmental process that pertains to the organization of a leaf in three-dimensional space once the structure has initially formed. [GOC:tb, PMID:16971475]
16	GO:0017145	0.0268628	stem cell division	biological_process	The self-renewing division of a stem cell. A stem cell is an undifferentiated cell, in the embryo or adult, that can undergo unlimited division and give rise to one or several different cell types. [GOC:jid, ISBN:0582227089]
[truncated: 6,554 more rows]

## Sheet: A GO category and all clusters
GO_id	Clusters	Name	Namespace	Definition
[truncated: 3,146 more rows]

## Sheet: GO - CCNM
Metabolite	Biosynthesis	Catabolism	Metabolism	Transport
[truncated: 46 more rows]
